# Supplementary material for: Extensive and coordinated control of allele-specific expression by both transcription and translation in Candida albicans
Source: HighWire-hosted journal article supplement (doi:10.1101/gr.166322.113), 2014-04-14
Supplement: SuppTable3.xlsx [file SuppTable3.xlsx]

## Sheet: Sheet1
A21_GFF_Index	ORF_Name	CGDID	CommonName	CAL_Name	Chromosome	Coding_strand	#_of_ORF_SNPs	#_of_SNP_Windows	mRNA_A	mRNA_B	mRNA Reads	FP_A	FP_B	FP Reads	Length	HMM_Length	BS_Mean	BS_Std	ABS(BS_Mean)	Z-Score	mRNA_ALFD	FP_ALFD	TE_ALFD	MINCOUNTS>4
4671	orf19.4236	CAL0000185		CAL0000185	5	C	17	14	1360	2090	11203	2494	2132	17409	1722	1826	0.845872	0.105079	0.845872	8.04987	-0.619896	0.226254	0.84615	1
3682	orf19.169	CAL0003197	CHO2	CAL0003197	R	W	19	17	905	825	8295	452	794	5269	2667	2681	-0.949895	0.133404	0.949895	7.12044	0.133524	-0.812816	-0.94634	1
252	orf19.1105.2	CAL0006784	PGA56	CAL0006784	5	W	1	8	16672	12776	126313	4471	13518	470533	255	1217	-1.99772	0.297222	1.99772	6.72131	0.383991	-1.59621	-1.9802	1
1465	orf19.1565	CAL0005565		CAL0005565	2	C	17	9	163	508	4381	389	2573	13060	1842	1914	-1.0832	0.176977	1.0832	6.12057	-1.63996	-2.72561	-1.08565	1
5701	orf19.3547	CAL0005913		CAL0005913	2	C	41	20	3323	2824	12159	4451	5293	31066	2004	2017	-0.485143	0.082596	0.485143	5.87369	0.234746	-0.249956	-0.484702	1
6130	orf19.490	CAL0005861	MNN12	CAL0005861	R	W	5	4	259	348	3077	185	742	3677	528	555	-1.59043	0.277868	1.59043	5.72367	-0.426135	-2.00389	-1.57776	1
257	orf19.5064.1	CAL0120819	ERD1	CAL0120819	1	W	0	2	406	839	10714	109	46	12660	192	461	2.26909	0.399237	2.26909	5.68356	-1.04719	1.24462	2.29181	1
3028	orf19.4311	CAL0000917		CAL0000917	5	W	2	4	6376	7898	60212	22417	22131	317877	456	643	0.326605	0.059988	0.326605	5.44451	-0.308836	0.0185246	0.32736	1
6174	orf19.3947	CAL0002982		CAL0002982	5	W	4	3	596	427	3164	901	1110	8176	339	387	-0.782852	0.145048	0.782852	5.39719	0.481076	-0.300961	-0.782037	1
1237	orf19.1064	CAL0001207	ACS2	CAL0001207	1	C	-1	7	2744	2728	54556	9126	11915	206498	3	4	-0.39475	0.077163	0.39475	5.11579	0.00843684	-0.384724	-0.393161	1
5457	orf19.4674.1	CAF0007466	ASK1	CAF0007466	4	W	2	3	9428	6095	47774	16550	16065	156624	231	442	-0.598004	0.11926	0.598004	5.01429	0.629326	0.0429102	-0.586415	1
2942	orf19.1026.1	CAL0120491		CAL0120491	1	W	1	3	88	100	801	7	106	1609	270	391	-3.74621	0.759292	3.74621	4.93382	-0.184425	-3.92057	-3.73614	1
1024	orf19.5515	CAL0006092		CAL0006092	6	C	13	6	754	875	7039	1459	1014	8691	981	1038	0.743165	0.153112	0.743165	4.85373	-0.214718	0.524922	0.739641	1
3301	orf19.5806	CAL0002252		CAL0002252	2	C	4	5	2119	2618	45767	7526	5769	215306	1500	1605	0.676241	0.139543	0.676241	4.84611	-0.305082	0.383562	0.688644	1
5547	orf19.4009	CAL0004650	TCP1	CAL0004650	5	C	2	3	656	434	4928	591	664	9273	522	589	-0.762115	0.158649	0.762115	4.80378	0.596001	-0.168025	-0.764026	1
1660	orf19.2954	CAL0006052		CAL0006052	1	W	2	4	1638	970	12516	1139	1110	28481	603	675	-0.710656	0.14941	0.710656	4.75642	0.755879	0.0372081	-0.718671	1
5481	orf19.6385	CAL0001406		CAL0001406	R	C	1	2	1124	1303	57781	1431	1017	461492	2334	2422	0.707733	0.149602	0.707733	4.73077	-0.213195	0.492704	0.705899	1
1286	orf19.665	CAL0001059	MTG2	CAL0001059	1	W	11	8	769	1171	5442	3678	3940	23572	804	922	0.505105	0.107166	0.505105	4.7133	-0.606686	-0.0992741	0.507411	1
4114	orf19.6312	CAL0001259	RPB8	CAL0001259	R	W	2	2	11529	12718	240455	30025	26402	775645	756	882	0.328707	0.069871	0.328707	4.70448	-0.141604	0.185517	0.327121	1
604	orf19.4477	CAL0001962		CAL0001962	1	C	8	9	287	480	2876	179	835	4161	1014	1100	-1.49408	0.318096	1.49408	4.69694	-0.741984	-2.22182	-1.47983	1
5555	orf19.4152	CAL0005746		CAL0005746	5	C	19	15	16246	15045	177117	76345	85784	1232825	3153	3431	-0.280439	0.060893	0.280439	4.60544	0.1108	-0.168175	-0.278975	1
316	orf19.2862	CAL0005171	RIB1	CAL0005171	R	C	6	6	152	87	1278	434	528	5697	1029	1039	-1.09573	0.242314	1.09573	4.52196	0.804984	-0.282843	-1.08783	1
215	orf19.4865	CAL0005434	CPP1	CAL0005434	1	W	14	10	420	667	6132	1034	970	12942	1857	1878	0.76647	0.169624	0.76647	4.51864	-0.667297	0.0921795	0.759477	1
346	orf19.3523	CAL0005839	ITR1	CAL0005839	2	C	15	11	187	255	2388	306	196	1993	2238	2246	1.09681	0.245919	1.09681	4.46005	-0.447459	0.642678	1.09014	1
2552	orf19.5113	CAL0002509		CAL0002509	1	C	3	2	51	42	486	33	214	824	1047	1061	-3.00589	0.674155	3.00589	4.45874	0.280108	-2.69707	-2.97718	1
1942	orf19.3221	CAL0003247	CPA2	CAL0003247	R	W	8	7	54	26	1291	1274	80	5243	3450	3465	2.86146	0.651156	2.86146	4.39443	1.05445	3.99322	2.93877	1
6175	orf19.1295	CAL0003105	VAS1	CAL0003105	2	C	15	11	2562	3108	36284	3930	3358	75344	3360	3482	0.511528	0.117037	0.511528	4.37065	-0.278716	0.226927	0.505643	1
3621	orf19.2795	CAL0004304	LHP1	CAL0004304	1	C	10	7	1951	1560	12479	6036	6819	54098	975	1019	-0.497451	0.115524	0.497451	4.30604	0.322668	-0.175967	-0.498635	1
4822	orf19.1872	CAL0001764		CAL0001764	2	W	4	6	1265	1538	13326	2707	1860	43511	636	785	0.821554	0.190989	0.821554	4.30158	-0.281918	0.541392	0.82331	1
2521	orf19.1762	CAL0000898	OCA1	CAL0000898	2	C	5	6	130	98	1062	103	210	2132	810	843	-1.44679	0.343217	1.44679	4.21538	0.407658	-1.02774	-1.4354	1
5538	orf19.2765	CAL0004255	PGA62	CAL0004255	4	W	0	5	2591	4065	59348	1210	1036	484734	642	1067	0.875995	0.208581	0.875995	4.19978	-0.649746	0.223983	0.873729	1
2293	orf19.4718	CAL0004378	CWH41	CAL0004378	4	C	7	8	1246	1000	13766	1421	1639	42701	2109	2207	-0.522304	0.12471	0.522304	4.18815	0.317304	-0.205909	-0.523213	1
6056	orf19.150	CAL0003142	TIM17	CAL0003142	2	W	1	2	161	123	4870	296	584	21799	465	556	-1.34811	0.323072	1.34811	4.17278	0.388402	-0.980371	-1.36877	1
2468	orf19.5742	CAL0001441		CAL0001441	6	W	60	36	141	127	1200	78	15	431	5673	5673	2.2667	0.547285	2.2667	4.14172	0.150867	2.37851	2.22764	1
367	orf19.2396	CAL0000841	IFR2	CAL0000841	R	W	4	3	509	1089	15258	1106	3476	47486	1077	1235	-0.563732	0.136425	0.563732	4.13218	-1.09727	-1.65208	-0.55481	1
4596	orf19.6271	CAL0000561	PBR1	CAL0000561	1	C	4	4	208	220	4104	47	131	7299	2133	2160	-1.40263	0.343566	1.40263	4.08257	-0.08092	-1.47883	-1.39791	1
2656	orf19.3223.1	CAF0007445		CAF0007445	R	W	2	1	465	639	7177	661	1557	23523	297	298	-0.749352	0.185161	0.749352	4.04703	-0.458585	-1.23605	-0.777462	1
2853	orf19.3227	CAL0003260	FTH2	CAL0003260	R	C	8	7	180	225	3087	369	246	3131	1536	1564	0.90745	0.225157	0.90745	4.0303	-0.321928	0.584963	0.906891	1
4247	orf19.930	CAL0003655		CAL0003655	5	W	2	2	7091	6974	227533	49596	64751	860342	906	1089	-0.403316	0.100322	0.403316	4.02021	0.0240027	-0.384679	-0.408681	1
4261	orf19.4532	CAL0002719		CAL0002719	1	W	14	8	1219	1327	7983	2920	4497	23848	1065	1085	-0.499299	0.1245	0.499299	4.01043	-0.12247	-0.622995	-0.500524	1
2936	orf19.4413	CAL0001750		CAL0001750	4	W	2	2	947	1213	15474	5132	4125	67105	450	451	0.662968	0.167993	0.662968	3.9464	-0.357143	0.315127	0.67227	1
6179	orf19.1839	CAL0001661	RPA190	CAL0001661	1	C	34	23	1804	1720	23425	4524	5519	61978	4998	5061	-0.356017	0.090222	0.356017	3.94601	0.0687908	-0.286808	-0.355599	1
837	orf19.5079	CAL0001762		CAL0001762	1	W	11	8	378	201	5813	240	25	3596	4473	4488	2.47005	0.627043	2.47005	3.9392	0.911191	3.26303	2.35184	1
3356	orf19.5383	CAL0004402	CHS8	CAL0004402	3	W	1	2	878	851	57890	2174	2940	670303	2688	2994	-0.475241	0.121091	0.475241	3.92466	0.0450618	-0.435464	-0.480526	1
2823	orf19.1236	CAL0002882	GVP36	CAL0002882	4	C	7	8	942	726	7023	2413	2688	20463	966	1057	-0.528692	0.135156	0.528692	3.91172	0.375758	-0.155705	-0.531463	1
775	orf19.1042	CAL0001151	POR1	CAL0001151	1	C	3	6	3786	5085	56041	12936	11873	254823	849	1093	0.550737	0.141452	0.550737	3.89346	-0.425573	0.123707	0.54928	1
2208	orf19.1095	CAL0001281	GLE2	CAL0001281	6	C	5	6	616	724	8042	1162	986	13440	1152	1240	0.473418	0.121597	0.473418	3.89334	-0.233059	0.236951	0.47001	1
1693	orf19.2672	CAL0003511	NCP1	CAL0003511	4	W	14	14	1752	1135	12502	1713	1468	17465	2043	2200	-0.40268	0.106206	0.40268	3.7915	0.62631	0.222673	-0.403637	1
1939	orf19.1235	CAL0002880	HOM3	CAL0002880	4	W	15	14	678	966	6508	1721	1853	21384	1635	1704	0.404948	0.107193	0.404948	3.77775	-0.510738	-0.106616	0.404122	1
190	orf19.3625	CAL0000348		CAL0000348	2	C	6	4	110	183	1274	76	31	770	1050	1058	2.10067	0.56244	2.10067	3.73493	-0.73434	1.29373	2.02807	1
4248	orf19.1376	CAL0003912		CAL0003912	2	W	8	6	605	587	4719	4143	2668	25888	888	1127	0.589452	0.158638	0.589452	3.7157	0.0435746	0.634917	0.591343	1
2388	orf19.4616	CAL0003616		CAL0003616	4	W	3	3	1518	964	21984	1643	1369	30644	780	865	-0.39097	0.105237	0.39097	3.71514	0.655067	0.26321	-0.391857	1
69	orf19.5732	CAL0001419		CAL0001419	6	W	8	8	446	347	5406	1614	1824	20411	1602	1603	-0.544884	0.147283	0.544884	3.69957	0.362108	-0.176465	-0.538573	1
5393	orf19.6231	CAL0000474		CAL0000474	1	C	3	3	416	458	3570	1301	971	11368	432	500	0.555335	0.150176	0.555335	3.69789	-0.138764	0.422078	0.560842	1
3350	orf19.2283	CAL0006377	DQD1	CAL0006377	2	C	1	1	128	139	4692	455	223	13638	441	534	1.13686	0.307607	1.13686	3.69581	-0.118941	1.02882	1.14776	1
1291	orf19.4230	CAL0000170	PTH2	CAL0000170	5	W	6	7	818	1205	6587	1696	1781	19408	837	957	0.488809	0.133048	0.488809	3.67393	-0.55886	-0.0705513	0.488309	1
568	orf19.92	CAL0000704	ERG11	CAL0000704	6	C	40	17	850	1004	6874	2925	4336	21468	2691	2725	-0.327926	0.08939	0.327926	3.66849	-0.240225	-0.567928	-0.327704	1
1163	orf19.4482	CAL0001993		CAL0001993	1	W	6	3	50	26	1309	135	11	1449	1767	1767	2.72118	0.742558	2.72118	3.6646	0.943416	3.61738	2.67397	1
2886	orf19.3895	CAL0002204		CAL0002204	5	C	21	12	5495	3602	42141	38238	31029	261339	1752	2153	-0.308467	0.084516	0.308467	3.64981	0.609321	0.30139	-0.307931	1
1059	orf19.84	CAL0000681	ASR3	CAL0000681	6	C	-1	5	41	47	998	68	9	690	12	13	3.23912	0.889518	3.23912	3.64144	-0.197037	2.91754	3.11457	1
1938	orf19.4048	CAL0004818	VCX1	CAL0004818	5	W	4	4	528	416	10200	341	552	7514	1113	1130	-1.03302	0.286594	1.03302	3.60447	0.343954	-0.694897	-1.03885	1
1940	orf19.2259	CAL0006298		CAL0006298	2	C	10	5	1119	675	6098	2607	2403	21665	816	839	-0.611482	0.169757	0.611482	3.6021	0.729251	0.117554	-0.611697	1
3937	orf19.3722	CAL0001135		CAL0001135	R	C	15	11	767	625	6857	474	590	7800	2550	2572	-0.611764	0.170126	0.611764	3.59595	0.29537	-0.315828	-0.611198	1
3378	orf19.2371	CAL0000780		CAL0000780	7	C	10	7	2439	4243	25887	392	1017	10475	954	1096	-0.579958	0.162178	0.579958	3.57606	-0.798795	-1.37539	-0.576599	1
2882	orf19.4092	CAL0004969	PES1	CAL0004969	2	C	1	1	34	17	1036	68	102	3417	498	536	-1.61428	0.451539	1.61428	3.57507	1	-0.584963	-1.58496	1
4697	orf19.3554	CAL0005926	BUD14	CAL0005926	2	C	5	7	2473	2204	34073	5537	6560	72117	1314	1476	-0.410415	0.11481	0.410415	3.57473	0.166138	-0.244591	-0.410729	1
3474	orf19.5547	CAL0006170		CAL0006170	6	W	3	4	1912	1953	8837	2770	1795	21728	324	466	0.667277	0.190674	0.667277	3.49957	-0.0306094	0.625902	0.656512	1
4726	orf19.4192	CAL0005886		CAL0005886	6	W	3	3	95	89	2278	48	116	3511	1629	1630	-1.37092	0.392126	1.37092	3.49611	0.0941222	-1.27302	-1.36714	1
5334	orf19.687	CAL0001139		CAL0001139	6	W	9	7	131	83	1320	158	215	2514	1686	1699	-1.09458	0.314659	1.09458	3.47861	0.658384	-0.444412	-1.1028	1
4964	orf19.1940	CAL0002581		CAL0002581	5	C	8	5	334	380	2692	469	851	4303	741	762	-0.670042	0.192737	0.670042	3.47646	-0.186151	-0.859571	-0.67342	1
759	orf19.1853	CAL0001692	HHT2	CAL0001692	R	W	1	1	1910	1660	46402	7732	4096	231810	411	507	0.745205	0.214939	0.745205	3.46705	0.202389	0.916626	0.714237	1
2830	orf19.3914	CAL0002861		CAL0002861	5	C	9	7	1176	1250	9237	1022	1498	11048	1296	1356	-0.462562	0.133732	0.462562	3.45887	-0.08804	-0.551642	-0.463602	1
2487	orf19.3744	CAL0001199	IFC1	CAL0001199	R	C	3	3	56	41	2218	62	118	4729	2238	2247	-1.39364	0.403684	1.39364	3.45231	0.449803	-0.928447	-1.37825	1
674	orf19.3618	CAL0000321	TLO9	CAL0000321	2	W	7	7	2698	2656	38876	25106	17209	365594	1602	2214	0.518534	0.150546	0.518534	3.44436	0.0226352	0.544869	0.522234	1
6012	orf19.4626	CAL0003644		CAL0003644	4	C	7	6	159	222	2086	248	180	2512	1182	1194	0.953704	0.277408	0.953704	3.43791	-0.481533	0.462343	0.943876	1
1963	orf19.4907	CAL0006205		CAL0006205	1	C	11	10	125	242	2228	575	684	4629	1818	1938	0.705338	0.205332	0.705338	3.43511	-0.953079	-0.250434	0.702645	1
6027	orf19.4131	CAL0005666		CAL0005666	5	C	29	11	866	983	6794	1089	1693	10827	2586	2610	-0.45803	0.13394	0.45803	3.41967	-0.182824	-0.636578	-0.453754	1
2356	orf19.2185	CAL0005449	NSA1	CAL0005449	2	C	6	4	408	340	4733	878	1175	11343	1221	1256	-0.682594	0.199783	0.682594	3.41668	0.263034	-0.420368	-0.683402	1
1556	orf19.4736	CAL0004429	TPO3	CAL0004429	1	W	10	9	443	76	3360	845	72	3653	1656	1674	1.02632	0.303535	1.02632	3.38123	2.54324	3.55288	1.00965	1
2946	orf19.649	CAL0001014		CAL0001014	R	W	28	18	646	853	6082	667	624	6018	2913	2937	0.49485	0.146404	0.49485	3.38003	-0.401012	0.0961407	0.497152	1
990	orf19.3366.1	CAF0006984		CAF0006984	4	W	2	1	603	463	4134	1542	2008	14039	252	253	-0.759919	0.226195	0.759919	3.35957	0.381146	-0.380957	-0.762102	1
2437	orf19.3183	CAL0002418		CAL0002418	5	W	7	5	317	487	2837	1547	1429	10002	675	699	0.729386	0.217447	0.729386	3.35432	-0.619439	0.114467	0.733906	1
2400	orf19.4730	CAL0004420		CAL0004420	1	W	2	2	53	54	1194	180	84	2629	723	724	1.12646	0.336677	1.12646	3.34581	-0.026967	1.09954	1.1265	1
4252	orf19.2570	CAL0002517	MCI4	CAL0002517	R	W	5	5	1673	1792	8799	9411	8364	37808	420	511	0.268934	0.080963	0.268934	3.32169	-0.0991332	0.170155	0.269288	1
1453	orf19.1354	CAL0003857	UCF1	CAL0003857	2	C	7	6	420	140	1449	382	213	1860	606	644	-0.742907	0.223758	0.742907	3.32014	1.58496	0.842719	-0.742243	1
6147	orf19.5280	CAL0003639		CAL0003639	1	W	7	2	767	715	11349	283	422	12423	1662	1697	-0.673806	0.203096	0.673806	3.31767	0.101283	-0.576441	-0.677724	1
1553	orf19.105	CAL0002967	HAL22	CAL0002967	6	W	9	7	137	436	2302	285	501	3657	1077	1195	0.850088	0.257628	0.850088	3.29967	-1.67015	-0.813849	0.856304	1
1278	orf19.5079.1	CAL0120823	QDR1	CAL0120823	1	C	0	2	613	748	11792	119	42	18343	387	599	1.85463	0.562914	1.85463	3.29469	-0.287151	1.5025	1.78965	1
1981	orf19.1528	CAL0005448		CAL0005448	2	W	3	3	307	281	5461	281	448	11155	1056	1210	-0.797132	0.242358	0.797132	3.28907	0.127669	-0.672929	-0.800597	1
5044	orf19.412	CAL0005572	LAS1	CAL0005572	1	C	-1	7	1330	1009	11981	2342	2211	18816	21	22	-0.31144	0.095386	0.31144	3.26505	0.3985	0.0830421	-0.315458	1
4888	orf19.5854.1	CAF0007057		CAF0007057	3	W	15	6	204	202	568	116	46	255	480	637	1.33476	0.412128	1.33476	3.23871	0.0142139	1.33442	1.32021	1
6052	orf19.4377	CAL0001119	PPH3	CAL0001119	R	C	5	4	303	220	969	898	943	4656	393	412	-0.529635	0.163888	0.529635	3.23169	0.461814	-0.0705423	-0.532357	1
2269	orf19.2372	CAL0000782		CAL0000782	7	C	44	25	1312	1878	15986	237	501	3164	4701	4726	-0.561151	0.17423	0.561151	3.22075	-0.517429	-1.07992	-0.562494	1
4652	orf19.1950	CAL0002596		CAL0002596	5	W	6	5	109	85	412	145	42	529	471	490	1.44465	0.449302	1.44465	3.21532	0.358793	1.78759	1.4288	1
6186	orf19.1806	CAL0001582		CAL0001582	R	W	8	4	99	84	1292	351	508	4826	1077	1168	-0.772951	0.240597	0.772951	3.21264	0.237039	-0.533357	-0.770397	1
5308	orf19.5813	CAL0002273	EBP7	CAL0002273	2	W	0	2	20	25	454	47	15	2384	558	582	2.02548	0.632063	2.02548	3.20456	-0.321928	1.6477	1.96963	1
1248	orf19.4815	CAL0005315		CAL0005315	1	W	20	11	933	872	5257	2407	3102	21511	1401	1416	-0.459366	0.143836	0.459366	3.19368	0.0975489	-0.365963	-0.463511	1
4294	orf19.3126	CAL0002267	CCT6	CAL0002267	4	C	5	3	370	226	10146	2000	1919	33349	1680	1731	-0.657488	0.206059	0.657488	3.19078	0.711202	0.0596453	-0.651557	1
839	orf19.2236	CAL0006246	FHL1	CAL0006246	2	C	18	15	183	165	2320	207	321	5161	3459	3474	-0.786416	0.247338	0.786416	3.17952	0.149378	-0.632943	-0.78232	1
4198	orf19.807	CAL0002612		CAL0002612	2	W	18	12	605	869	4722	1444	1618	11683	1689	1762	0.358122	0.11273	0.358122	3.17681	-0.522421	-0.164141	0.35828	1
5088	orf19.1772	CAL0000929		CAL0000929	2	C	12	12	260	331	4255	350	280	5274	2955	2990	0.667125	0.210157	0.667125	3.17441	-0.34832	0.321928	0.670248	1
3489	orf19.2929	CAL0005999	GSC1	CAL0005999	1	C	16	12	1121	1105	24320	3084	2278	81416	5694	5753	0.41212	0.130255	0.41212	3.16395	0.0207399	0.437035	0.416295	1
3705	orf19.1389	CAL0003946		CAL0003946	2	W	4	6	2153	1816	12889	2146	2472	20780	492	766	-0.450494	0.143086	0.450494	3.14841	0.245584	-0.204029	-0.449613	1
2482	orf19.2831	CAL0005108	RPC31	CAL0005108	R	C	1	2	82	87	3250	5	27	5803	870	976	-2.4173	0.767867	2.4173	3.14808	-0.0853915	-2.43296	-2.34757	1
2251	orf19.225	CAL0003924		CAL0003924	2	C	10	7	233	140	1663	127	25	831	1086	1098	1.66241	0.528253	1.66241	3.14699	0.734903	2.34483	1.60993	1
1592	orf19.1697	CAL0000191		CAL0000191	3	C	4	4	837	926	14431	2154	1704	35756	1062	1152	0.497771	0.158621	0.497771	3.13812	-0.145785	0.338093	0.483877	1
1344	orf19.4199	CAL0005895		CAL0005895	6	W	9	7	105	137	1425	218	146	2451	1572	1587	0.963439	0.307611	0.963439	3.132	-0.383787	0.57836	0.962146	1
4801	orf19.449	CAL0005709	RPL17B	CAL0005709	1	C	12	8	63	35	358	98	132	749	1197	1197	-1.30901	0.418645	1.30901	3.12677	0.847997	-0.429684	-1.27768	1
579	orf19.2418	CAL0001483		CAL0001483	R	C	9	3	173	227	985	432	351	2002	576	597	0.687271	0.219917	0.687271	3.12514	-0.39192	0.29956	0.691481	1
5669	orf19.729.1	CAL0001799	ARP2	CAL0001799	R	W	11	7	155	124	2055	151	215	3201	2640	2654	-0.831785	0.266778	0.831785	3.11789	0.321928	-0.509788	-0.831716	1
3538	orf19.4956	CAL0006334	ECM25	CAL0006334	1	C	9	10	934	834	14629	1411	1772	34453	2988	3222	-0.486312	0.156023	0.486312	3.11693	0.163375	-0.328661	-0.492036	1
5488	orf19.4765	CAL0004519	ARG81	CAL0004519	1	C	5	7	898	647	7419	9509	8623	77480	660	913	-0.331466	0.106399	0.331466	3.11531	0.47295	0.141104	-0.331846	1
4436	orf19.926	CAL0003631		CAL0003631	5	C	18	11	312	476	4459	436	417	4627	2100	2131	0.674978	0.217056	0.674978	3.1097	-0.609416	0.0642808	0.673696	1
1716	orf19.1161	CAL0002069	PLD1	CAL0002069	1	W	27	21	336	399	6467	545	431	8042	5133	5175	0.582576	0.189312	0.582576	3.07733	-0.247928	0.338568	0.586496	1
2324	orf19.2298	CAL0006417	WBP1	CAL0006417	1	W	1	1	94	145	11603	40	142	24297	1314	1354	-1.18893	0.387842	1.18893	3.06551	-0.62532	-1.82782	-1.2025	1
3520	orf19.3402	CAL0004863		CAL0004863	6	C	-1	6	179	149	1300	85	151	686	1176	1177	-1.08774	0.35618	1.08774	3.0539	0.264647	-0.829014	-1.09366	1
1385	orf19.1828	CAL0001634	BUD16	CAL0001634	1	W	16	9	296	260	1570	175	263	1530	1050	1065	-0.777336	0.254707	0.777336	3.05188	0.187086	-0.587708	-0.774793	1
2155	orf19.5230	CAL0003535		CAL0003535	1	C	3	4	621	620	11447	704	452	24144	1011	1113	0.650282	0.213657	0.650282	3.04358	0.00232505	0.639253	0.636928	1
1293	orf19.6854	CAL0005797		CAL0005797	1	W	6	5	6103	5855	87272	31880	36475	723258	1641	1642	-0.253818	0.083482	0.253818	3.04039	0.0598494	-0.194256	-0.254106	1
2057	orf19.1186	CAL0002131		CAL0002131	6	W	7	2	151	249	2198	276	267	2532	693	708	0.768343	0.254008	0.768343	3.02488	-0.721597	0.0478285	0.769426	1
5352	orf19.2609	CAL0003365	CET1	CAL0003365	R	C	5	6	240	274	3703	277	196	8186	1563	1641	0.69151	0.229657	0.69151	3.01106	-0.191141	0.499032	0.690174	1
4449	orf19.405	CAL0005539	HTS1	CAL0005539	1	C	6	2	206	205	3854	162	267	6534	1251	1295	-0.728265	0.242725	0.728265	3.00037	0.00702043	-0.720846	-0.727866	1
1600	orf19.5735	CAL0001424	ALS1	CAL0001424	6	C	3	2	49	69	2254	194	119	3314	1191	1216	1.20809	0.403342	1.20809	2.9952	-0.493815	0.705095	1.19891	1
331	orf19.4639	CAL0003680	PWP1	CAL0003680	4	C	2	3	150	196	4476	242	132	5162	675	831	1.21469	0.407225	1.21469	2.98286	-0.385891	0.874469	1.26036	1
2679	orf19.2305	CAL0000648		CAL0000648	1	C	2	2	191	182	3087	370	556	9697	375	419	-0.663606	0.223957	0.663606	2.9631	0.0696342	-0.58756	-0.657194	1
5129	orf19.1768	CAL0000904		CAL0000904	2	W	14	11	33	13	456	10	32	226	3135	3135	-3.02588	1.02262	3.02588	2.95895	1.34395	-1.67807	-3.02203	1
4501	orf19.1485	CAL0004737		CAL0004737	2	C	2	4	1336	1095	9349	1601	1828	13053	342	539	-0.484384	0.163838	0.484384	2.95648	0.286989	-0.191293	-0.478282	1
880	orf19.6259	CAL0000517		CAL0000517	1	C	19	8	544	681	2789	1028	925	5113	1125	1141	0.475831	0.161123	0.475831	2.95322	-0.324048	0.152315	0.476363	1
1274	orf19.3415.1	CAF0006985	ACF2	CAF0006985	6	W	1	1	6022	6064	111987	18977	24160	458602	396	397	-0.328082	0.111223	0.328082	2.94977	-0.010027	-0.348369	-0.338341	1
2498	orf19.4127	CAL0005635		CAL0005635	2	C	-1	7	300	402	4149	668	605	8681	57	58	0.567366	0.192748	0.567366	2.94356	-0.422233	0.142913	0.565146	1
609	orf19.6314	CAL0001261		CAL0001261	R	W	2	4	757	730	6369	481	645	14998	447	679	-0.468632	0.160294	0.468632	2.92358	0.0523968	-0.423262	-0.475659	1
4825	orf19.1517	CAL0005414	ARO3	CAL0005414	2	W	3	3	1175	1120	19267	2128	1561	44887	1116	1117	0.378023	0.129439	0.378023	2.92047	0.069162	0.447028	0.377866	1
17	orf19.3991	CAL0003171		CAL0003171	5	C	12	11	217	181	2241	129	188	2093	2202	2376	-0.805433	0.277113	0.805433	2.90651	0.261705	-0.543362	-0.805067	1
26	orf19.2867	CAL0005176		CAL0005176	4	W	10	8	125	167	2935	505	418	6621	2019	2032	0.693904	0.238867	0.693904	2.90498	-0.41792	0.27278	0.6907	1
793	orf19.714	CAL0001741		CAL0001741	R	C	3	7	447	377	3168	625	750	4752	660	1085	-0.50367	0.173427	0.50367	2.90422	0.24571	-0.263034	-0.508745	1
395	orf19.2286	CAL0006381		CAL0006381	2	W	7	6	1939	1720	15040	6392	7233	67271	957	989	-0.345925	0.119918	0.345925	2.88468	0.172904	-0.178327	-0.351231	1
3835	orf19.755	CAL0001865		CAL0001865	1	C	1	2	254	226	3251	696	1306	10304	363	461	-1.03496	0.359423	1.03496	2.8795	0.168506	-0.907996	-1.0765	1
5395	orf19.2631	CAL0003427		CAL0003427	4	W	6	20	1020	1136	10696	614	950	12408	990	4126	-0.469274	0.162974	0.469274	2.87944	-0.155394	-0.629689	-0.474295	1
3994	orf19.1466	CAL0004656	REX2	CAL0004656	2	W	2	2	96	89	2700	61	105	5293	714	781	-0.898568	0.312162	0.898568	2.87853	0.109229	-0.783508	-0.892737	1
3308	orf19.5645	CAL0000641		CAL0000641	4	C	3	3	602	501	19370	976	1062	22105	1323	1386	-0.38424	0.133804	0.38424	2.87166	0.264953	-0.121831	-0.386784	1
1521	orf19.4966	CAL0006367	COX19	CAL0006367	1	C	3	3	165	62	5083	93	91	13379	2196	2215	-1.35302	0.472375	1.35302	2.86428	1.41213	0.0313642	-1.38076	1
4445	orf19.2511.1	CAF0006955	MRPL33	CAF0006955	3	W	1	3	347	377	3106	803	470	9747	291	428	0.926581	0.324228	0.926581	2.85781	-0.119629	0.772739	0.892368	1
2592	orf19.3335	CAL0004121		CAL0004121	1	W	0	3	1121	1551	18659	66	51	47396	603	742	0.821909	0.287752	0.821909	2.85631	-0.468412	0.371969	0.840381	1
2965	orf19.1339	CAL0003799	CPY1	CAL0003799	7	W	10	8	1098	857	11979	1135	1134	16181	1629	1728	-0.359332	0.125901	0.359332	2.85408	0.357511	0.00127166	-0.356239	1
441	orf19.1946	CAL0002587		CAL0002587	5	C	3	4	489	997	12369	1169	1567	20100	900	933	0.60979	0.215841	0.60979	2.82518	-1.02776	-0.42273	0.605029	1
2506	orf19.3178	CAL0002401		CAL0002401	5	W	18	11	173	244	1404	274	246	1886	1542	1556	0.65093	0.231047	0.65093	2.81731	-0.496109	0.155518	0.651627	1
3785	orf19.2722	CAL0004197	CGR1	CAL0004197	4	C	6	5	120	158	1783	188	402	3037	1023	1032	-0.703573	0.250132	0.703573	2.81281	-0.39689	-1.09646	-0.699573	1
3219	orf19.4750	CAL0004474		CAL0004474	1	C	30	18	223	219	1250	98	48	591	2103	2103	1.01375	0.360435	1.01375	2.81258	0.0261128	1.02975	1.00363	1
1538	orf19.2028	CAL0004365	MXR1	CAL0004365	2	C	2	2	208	159	3365	529	783	7731	558	610	-0.929094	0.330664	0.929094	2.80978	0.387557	-0.565745	-0.953301	1
5529	orf19.248	CAL0003993	APL5	CAL0003993	3	W	19	12	298	251	5155	220	284	4190	3300	3314	-0.620987	0.221379	0.620987	2.80509	0.247625	-0.368387	-0.616012	1
1711	orf19.3102	CAL0002214	CTA6	CAL0002214	4	W	7	4	70	105	842	152	110	1342	642	655	1.08379	0.386778	1.08379	2.8021	-0.584963	0.466568	1.05153	1
592	orf19.6382	CAL0001399		CAL0001399	R	C	19	15	209	162	2979	88	19	1541	4473	4484	1.94371	0.69575	1.94371	2.79369	0.367509	2.2115	1.84399	1
3058	orf19.260	CAL0004027	SLD1	CAL0004027	3	C	34	15	574	635	2784	809	676	3642	1755	1796	0.401949	0.144446	0.401949	2.78269	-0.145706	0.259116	0.404822	1
2968	orf19.5518	CAL0006096	ASG7	CAL0006096	6	C	13	9	677	470	2191	1084	1080	5301	741	795	-0.514903	0.186006	0.514903	2.76821	0.526495	0.00533344	-0.521162	1
1851	orf19.1553	CAL0005527	ENT3	CAL0005527	2	C	-1	8	1261	1224	9289	3994	4872	30908	9	10	-0.327565	0.118591	0.327565	2.76214	0.0429647	-0.28668	-0.329645	1
51	orf19.3642	CAL0000399		CAL0000399	6	W	10	9	2316	1758	19455	4717	4314	72099	1257	1432	-0.268475	0.097318	0.268475	2.75874	0.3977	0.128843	-0.268857	1
1871	orf19.4681	CAL0003816	HGT17	CAL0003816	4	W	11	3	161	160	5023	296	162	10093	2907	2923	0.865902	0.314243	0.865902	2.75552	0.00898878	0.869603	0.860615	1
966	orf19.2737	CAL0004219		CAL0004219	4	C	19	14	694	703	5271	540	707	6461	2229	2253	-0.369624	0.134212	0.369624	2.75403	-0.018589	-0.388751	-0.370162	1
4538	orf19.4248	CAL0000227		CAL0000227	5	W	15	7	2306	3187	11451	1242	1353	8331	906	982	0.343133	0.124642	0.343133	2.75295	-0.466807	-0.123497	0.34331	1
116	orf19.6344	CAL0001321		CAL0001321	1	W	8	5	123	399	3702	262	475	5165	1173	1296	0.847834	0.308337	0.847834	2.7497	-1.69773	-0.858361	0.83937	1
4557	orf19.5749	CAL0001453	ORM1	CAL0001453	6	C	11	5	1333	1582	8998	3188	4778	24954	666	793	-0.334598	0.12171	0.334598	2.74914	-0.247073	-0.583755	-0.336682	1
337	orf19.1139	CAL0001968		CAL0001968	1	C	17	12	214	289	3404	784	749	9619	2925	2938	0.494514	0.180358	0.494514	2.74185	-0.433459	0.0658879	0.499347	1
1742	orf19.2143	CAL0005345		CAL0005345	6	C	25	18	376	538	3587	673	718	7399	2844	2854	0.4265	0.155714	0.4265	2.739	-0.516874	-0.0933773	0.423496	1
3512	orf19.171	CAL0003204	DBP2	CAL0003204	R	W	3	3	142	148	9674	944	579	90226	1689	1690	0.770919	0.281468	0.770919	2.73892	-0.0597062	0.705224	0.76493	1
1620	orf19.6243	CAL0000495		CAL0000495	1	W	47	20	193	137	1184	189	224	1143	3063	3076	-0.742132	0.271324	0.742132	2.73522	0.494425	-0.245112	-0.739537	1
1176	orf19.250	CAL0004001	SLC1	CAL0004001	3	C	7	5	594	437	5612	437	441	7187	882	1007	-0.456688	0.167187	0.456688	2.7316	0.44283	-0.0131454	-0.455975	1
4842	orf19.645.1	CAF0006905		CAF0006905	R	W	4	4	238	243	5570	871	642	16917	1410	1411	0.467202	0.17126	0.467202	2.72803	-0.0299947	0.440099	0.470094	1
4213	orf19.2319	CAL0000677		CAL0000677	1	W	18	11	1091	876	7813	1917	1935	23485	2019	2143	-0.331115	0.121577	0.331115	2.7235	0.316648	-0.0134832	-0.330132	1
5807	orf19.3624	CAL0000344		CAL0000344	2	C	24	24	313	327	2839	277	193	2929	3441	3456	0.583327	0.214209	0.583327	2.72317	-0.063128	0.521285	0.584413	1
1451	orf19.4967	CAL0006369	KEM1	CAL0006369	1	W	2	1	40	88	1546	290	295	3713	399	400	1.12888	0.415018	1.12888	2.72008	-1.1375	-0.0246621	1.11284	1
3396	orf19.395	CAL0004953	MSM1	CAL0004953	1	C	1	2	13260	14605	339384	3734	8301	1377474	1323	1440	-1.01802	0.374377	1.01802	2.71923	-0.139382	-1.15256	-1.01318	1
2798	orf19.4380.1	CAF0007422	VTC3	CAF0007422	R	C	24	5	16	29	119	42	5	393	2604	2604	3.86378	1.4213	3.86378	2.71849	-0.857981	3.07039	3.92837	1
5635	orf19.5568	CAL0006217		CAL0006217	6	C	12	5	79	104	834	207	159	2192	951	964	0.783147	0.288697	0.783147	2.7127	-0.396659	0.380604	0.777263	1
2	orf19.1667.1	CAF0006928		CAF0006928	3	C	2	2	30	41	381	132	69	1303	267	305	1.45883	0.538197	1.45883	2.71058	-0.450661	0.93587	1.38653	1
3607	orf19.3661	CAL0000433	PHO91	CAL0000433	1	C	22	13	202	280	1637	316	295	3111	2475	2487	0.575168	0.212641	0.575168	2.70488	-0.471072	0.0992096	0.570281	1
6013	orf19.1217	CAL0002796		CAL0002796	6	W	42	23	741	853	4132	697	606	4803	2637	2894	0.404605	0.149869	0.404605	2.69972	-0.203072	0.201841	0.404913	1
4106	orf19.4046	CAL0004817	DES1	CAL0004817	5	C	1	1	22	12	849	18	24	772	462	488	-1.30926	0.485111	1.30926	2.69889	0.874469	-0.415037	-1.28951	1
5712	orf19.2419	CAL0001484		CAL0001484	R	W	9	8	463	535	3658	570	476	5495	1182	1247	0.465956	0.172657	0.465956	2.69874	-0.208527	0.26	0.468527	1
2365	orf19.6706	CAL0004710	PSP1	CAL0004710	7	W	15	14	142	127	1742	125	189	1779	2331	2382	-0.758156	0.281096	0.758156	2.69714	0.161062	-0.596458	-0.757521	1
3078	orf19.2629	CAL0003416	USO1	CAL0003416	4	W	27	18	561	610	9117	422	336	8042	6429	6443	0.453735	0.168266	0.453735	2.69653	-0.120808	0.328782	0.44959	1
4884	orf19.3802	CAL0001900	MNN22	CAL0001900	4	W	7	7	250	186	5732	200	236	6835	2499	2655	-0.671239	0.249324	0.671239	2.69224	0.426625	-0.238787	-0.665412	1
1033	orf19.6016	CAL0005047		CAL0005047	1	W	23	13	281	203	1874	272	295	2181	2151	2164	-0.587805	0.218765	0.587805	2.68692	0.46909	-0.117108	-0.586199	1
5118	orf19.233.1	CAF0006891	HRT1	CAF0006891	3	W	3	3	212	289	1829	1116	1093	6396	372	373	0.479048	0.178412	0.479048	2.68507	-0.447005	0.0300436	0.477049	1
803	orf19.1743	CAL0000855	ACS1	CAL0000855	2	C	17	13	981	760	8123	1646	1578	14706	2028	2095	-0.306764	0.114363	0.306764	2.68237	0.368254	0.0608671	-0.307387	1
2567	orf19.1028	CAL0001087	ELA1	CAL0001087	1	C	7	6	72	62	800	128	51	1248	1179	1192	1.11031	0.415095	1.11031	2.67483	0.215729	1.32757	1.11185	1
3347	orf19.255	CAL0004010	ZCF1	CAL0004010	3	C	23	11	57	127	903	43	200	2322	2517	2517	-1.07488	0.40188	1.07488	2.67463	-1.15579	-2.21759	-1.0618	1
5520	orf19.3599	CAL0006026		CAL0006026	2	C	28	21	2807	2185	26183	11411	10340	89846	3255	3301	-0.218374	0.081676	0.218374	2.67366	0.361396	0.142189	-0.219207	1
3243	orf19.986	CAL0003813	HAL21	CAL0003813	1	W	7	5	786	803	10281	980	760	14436	1122	1171	0.40569	0.15179	0.40569	2.67271	-0.0308707	0.366782	0.397653	1
162	orf19.52	CAL0000602		CAL0000602	1	C	1	1	25	37	3388	29	8	3365	1563	1593	2.49067	0.933383	2.49067	2.66843	-0.565597	1.85798	2.42358	1
5581	orf19.1202	CAL0002763		CAL0002763	6	C	11	10	108	106	933	190	107	1309	1335	1345	0.798897	0.300301	0.798897	2.66032	0.026967	0.828389	0.801422	1
4545	orf19.3542	CAL0005904		CAL0005904	2	W	2	2	84	90	3964	48	104	5449	1320	1335	-1.00611	0.378325	1.00611	2.65937	-0.0995357	-1.11548	-1.01594	1
1986	orf19.1254	CAL0002954	SEC23	CAL0002954	4	W	17	10	1757	1846	15989	1862	2371	28560	2289	2379	-0.282716	0.106322	0.282716	2.65905	-0.0712884	-0.348643	-0.277354	1
3877	orf19.2414	CAL0001475		CAL0001475	R	W	8	5	248	157	2302	630	599	5621	969	983	-0.583963	0.219647	0.583963	2.65864	0.659576	0.0727958	-0.58678	1
5508	orf19.2980	CAL0006126		CAL0006126	1	C	12	12	177	120	1889	71	100	1149	2178	2178	-1.07237	0.403899	1.07237	2.65504	0.560715	-0.494109	-1.05482	1
1649	orf19.4811	CAL0005311		CAL0005311	1	C	12	6	463	477	4151	667	480	7744	987	1018	0.516829	0.194738	0.516829	2.65397	-0.0429771	0.474652	0.517629	1
999	orf19.1972	CAL0002669		CAL0002669	5	C	5	4	152	150	3048	542	352	7795	1422	1436	0.60536	0.229309	0.60536	2.63993	0.0191088	0.622717	0.603609	1
2005	orf19.1634	CAL0006403		CAL0006403	3	W	12	7	243	202	1791	402	521	4183	1131	1132	-0.647726	0.245385	0.647726	2.63963	0.266601	-0.374088	-0.640689	1
1782	orf19.5817	CAL0002279		CAL0002279	2	W	3	3	198	157	1782	265	309	3265	576	577	-0.556661	0.210898	0.556661	2.63948	0.334736	-0.221614	-0.55635	1
2598	orf19.3391	CAL0004216	DOG1	CAL0004216	6	W	4	5	2804	2280	30813	12280	11801	133164	750	1034	-0.239748	0.090855	0.239748	2.6388	0.298453	0.0574014	-0.241051	1
5278	orf19.5213.2	CAF0007034	VPS33	CAF0007034	2	W	1	2	2420	2729	25407	9742	8603	68349	186	440	0.322997	0.122404	0.322997	2.63878	-0.173365	0.179378	0.352743	1
5649	orf19.4257	CAL0000261		CAL0000261	5	W	43	29	430	513	4166	2111	2017	18475	5136	5137	0.325997	0.123566	0.325997	2.63824	-0.254622	0.0657155	0.320338	1
1322	orf19.3941	CAL0002977		CAL0002977	5	C	8	9	1479	1272	17614	1567	1815	28986	1722	1892	-0.436236	0.165693	0.436236	2.6328	0.217523	-0.211964	-0.429488	1
3147	orf19.5567	CAL0006215		CAL0006215	6	W	9	5	143	87	1188	455	448	2789	840	862	-0.697716	0.265346	0.697716	2.62946	0.716928	0.0223678	-0.69456	1
3880	orf19.3004	CAL0001328		CAL0001328	1	W	6	5	99	140	1686	279	217	3830	1233	1247	0.858862	0.326745	0.858862	2.62854	-0.499926	0.36257	0.862496	1
1758	orf19.5058	CAL0001688	GCS1	CAL0001688	1	C	29	13	2081	1994	11229	2928	3373	19110	1863	1880	-0.264773	0.10095	0.264773	2.62281	0.0616116	-0.204117	-0.265728	1
1961	orf19.6298	CAL0000625		CAL0000625	5	C	13	10	206	215	2258	277	445	4544	1896	1924	-0.619221	0.236262	0.619221	2.62091	-0.0616923	-0.683919	-0.622227	1
515	orf19.4892	CAL0005520		CAL0005520	1	C	5	4	315	321	4530	246	163	4042	1218	1237	0.619194	0.236332	0.619194	2.62002	-0.0272215	0.593786	0.621008	1
3874	orf19.4079	CAL0004912		CAL0004912	2	W	14	6	587	463	2941	2416	2472	10971	792	825	-0.374307	0.142984	0.374307	2.61782	0.342348	-0.0330583	-0.375407	1
4491	orf19.2651	CAL0003469	CAM1-1	CAL0003469	5	W	6	3	3142	2976	79579	6553	4932	179790	1260	1452	0.329265	0.125817	0.329265	2.61702	0.0783087	0.409983	0.331674	1
1849	orf19.4650	CAL0003717	PGA53	CAL0003717	4	W	1	1	165	273	17268	865	973	41204	912	979	0.583748	0.223119	0.583748	2.61631	-0.726435	-0.16974	0.556695	1
2261	orf19.5181	CAL0002691	POL3	CAL0002691	7	W	10	9	198	68	3132	182	7	3698	3246	3259	3.21541	1.23192	3.21541	2.61008	1.54189	4.70044	3.15855	1
4464	orf19.1804	CAL0001578		CAL0001578	R	W	8	8	129	222	1483	146	130	1710	1089	1104	0.952136	0.365047	0.952136	2.60826	-0.783189	0.167457	0.950645	1
1879	orf19.1522	CAL0005435		CAL0005435	2	C	31	32	532	461	2980	1174	1276	8317	3129	3483	-0.329295	0.126883	0.329295	2.59526	0.206659	-0.120196	-0.326855	1
115	orf19.2547	CAL0002467		CAL0002467	R	C	36	20	256	279	1682	108	64	641	2961	2964	0.878039	0.339122	0.878039	2.58915	-0.124121	0.754888	0.879009	1
1781	orf19.6621	CAL0003977		CAL0003977	R	C	19	16	111	151	2389	335	294	4384	3630	3680	0.628949	0.243482	0.628949	2.58314	-0.443989	0.188345	0.632334	1
5791	orf19.1224	CAL0002835	FRP3	CAL0002835	2	W	1	1	25	39	1821	88	60	14343	858	897	1.19496	0.462641	1.19496	2.5829	-0.641546	0.552541	1.19409	1
5573	orf19.5628	CAL0000594	APA2	CAL0000594	6	W	4	4	234	286	4409	411	350	6196	930	931	0.527192	0.204252	0.527192	2.58109	-0.289507	0.231783	0.52129	1
996	orf19.2330	CAL0000714		CAL0000714	1	W	12	10	870	897	6954	1224	988	11699	1296	1338	0.356739	0.138606	0.356739	2.57376	-0.0440926	0.309021	0.353113	1
380	orf19.4816	CAL0005316	RAM2	CAL0005316	1	C	9	7	133	151	1790	125	75	1204	1350	1362	0.931993	0.36362	0.931993	2.5631	-0.183122	0.736966	0.920088	1
3090	orf19.4948	CAL0006310		CAL0006310	1	C	12	8	177	201	1164	259	170	1806	1215	1283	0.797582	0.311386	0.797582	2.56139	-0.183446	0.607417	0.790863	1
547	orf19.1362	CAL0003882	SMM1	CAL0003882	2	W	1	1	7	12	1541	20	8	2065	1302	1317	2.2517	0.87924	2.2517	2.56097	-0.777608	1.32193	2.09954	1
2422	orf19.1031	CAL0001113	HMG1	CAL0001113	1	C	19	19	1156	921	12452	2182	2178	21569	3222	3440	-0.322747	0.126118	0.322747	2.55909	0.327868	0.00264715	-0.325221	1
5212	orf19.3684	CAL0000467	PSY2	CAL0000467	1	C	4	3	55	78	1190	187	107	2498	879	891	1.34638	0.526585	1.34638	2.55682	-0.504043	0.805427	1.30947	1
1788	orf19.4954	CAL0006331		CAL0006331	1	C	2	3	492	493	7805	567	796	8498	591	768	-0.494407	0.193707	0.494407	2.55234	-0.00292933	-0.48942	-0.48649	1
5514	orf19.5213	CAL0003502	COX8	CAL0003502	2	W	19	11	241	235	2146	218	321	3090	2445	2460	-0.606226	0.237666	0.606226	2.55075	0.0363724	-0.558245	-0.594618	1
7	orf19.4447	CAL0001851	SOG2	CAL0001851	1	W	4	4	985	1106	10094	627	530	8986	900	974	0.415029	0.16308	0.415029	2.54494	-0.167156	0.242473	0.409629	1
4243	orf19.2760	CAL0004251		CAL0004251	4	W	28	20	418	462	5669	573	466	6116	4263	4277	0.443742	0.174404	0.443742	2.54433	-0.14439	0.298205	0.442595	1
3293	orf19.6359	CAL0001349	PTP1	CAL0001349	1	W	3	2	102	152	917	148	375	2240	402	428	-0.749109	0.295001	0.749109	2.53934	-0.575502	-1.34129	-0.765791	1
3437	orf19.4606	CAL0003589		CAL0003589	4	C	19	8	465	426	3470	607	751	5943	1299	1318	-0.43393	0.170968	0.43393	2.53808	0.126377	-0.307116	-0.433494	1
3936	orf19.6860	CAL0005824	VPH1	CAL0005824	4	W	2	4	175	150	2317	370	511	6261	693	825	-0.685914	0.272077	0.685914	2.52103	0.222392	-0.465798	-0.68819	1
6015	orf19.422	CAL0005609		CAL0005609	1	W	8	9	33	78	893	189	223	3719	2256	2277	1.02524	0.406723	1.02524	2.52074	-1.24101	-0.238657	1.00235	1
2195	orf19.5296	CAL0003681		CAL0003681	4	W	5	2	176	223	3087	652	540	7774	663	668	0.627513	0.249615	0.627513	2.51392	-0.341468	0.271913	0.613381	1
2097	orf19.3541	CAL0005902	LEM3	CAL0005902	2	C	1	1	206	298	23056	1088	1118	62313	1311	1476	0.492059	0.196262	0.492059	2.50715	-0.532668	-0.0392416	0.493426	1
3184	orf19.1143	CAL0002005		CAL0002005	1	W	8	5	108	89	1338	60	98	2044	1185	1200	-0.993906	0.396969	0.993906	2.50374	0.279154	-0.707819	-0.986973	1
5060	orf19.1065	CAL0001208	SSA2	CAL0001208	1	C	9	8	7956	9746	115862	58134	86906	914808	1938	2050	-0.295084	0.118079	0.295084	2.49904	-0.292767	-0.580074	-0.287307	1
4519	orf19.3197	CAL0002451	PAP1	CAL0002451	5	W	1	1	77	24	3637	105	75	2770	1668	1686	-1.24874	0.50022	1.24874	2.49637	1.68182	0.485427	-1.1964	1
5140	orf19.4250	CAL0000245	ZCF22	CAL0000245	5	C	11	4	274	276	1171	414	291	2600	525	557	0.519576	0.208284	0.519576	2.49456	-0.0104924	0.508612	0.519104	1
1423	orf19.675	CAL0001097		CAL0001097	1	W	9	6	216	397	1782	969	1371	5369	639	658	0.378008	0.151587	0.378008	2.49367	-0.878108	-0.50066	0.377448	1
2694	orf19.2478	CAL0001612		CAL0001612	1	C	9	7	56	79	660	142	109	970	1143	1151	0.884597	0.355351	0.884597	2.48936	-0.496426	0.381563	0.877989	1
3950	orf19.1140	CAL0001998		CAL0001998	1	C	3	4	440	387	5384	693	857	9943	627	731	-0.51534	0.207321	0.51534	2.48571	0.18517	-0.30644	-0.49161	1
3802	orf19.3604	CAL0000276	PEX17	CAL0000276	2	W	4	4	62	52	1829	50	103	3536	1149	1171	-1.25331	0.504326	1.25331	2.48512	0.253757	-1.04264	-1.2964	1
4123	orf19.1342	CAL0003822	SHM1	CAL0003822	7	C	10	8	1893	2195	19452	5062	4971	53164	1482	1533	0.241076	0.09703	0.241076	2.48455	-0.213547	0.0261714	0.239718	1
359	orf19.908	CAL0003580		CAL0003580	2	C	1	3	782	701	11948	279	491	20541	879	1113	-0.997545	0.401674	0.997545	2.48347	0.157754	-0.815458	-0.973212	1
4144	orf19.646	CAL0001010		CAL0001010	R	W	8	6	4401	4088	53645	23079	18092	140435	1122	1430	0.247723	0.099945	0.247723	2.47859	0.106436	0.351229	0.244793	1
5884	orf19.337	CAL0004755	DOT4	CAL0004755	3	C	-1	4	215	261	2643	675	565	6962	21	22	0.540234	0.218149	0.540234	2.47644	-0.279713	0.256637	0.53635	1
3092	orf19.230	CAL0003947		CAL0003947	3	C	17	12	123	133	2101	51	22	1247	2640	2646	1.3391	0.543341	1.3391	2.46456	-0.112768	1.21299	1.32576	1
1864	orf19.5660	CAL0000687	PEP7	CAL0000687	4	C	-1	4	43	111	1063	85	90	930	75	76	1.28342	0.520921	1.28342	2.46375	-1.36815	-0.0824622	1.28569	1
4286	orf19.1907	CAL0002503	EMC9	CAL0002503	2	C	9	9	120	161	2818	246	224	2626	2154	2187	0.568167	0.23067	0.568167	2.46312	-0.424026	0.13516	0.559186	1
5322	orf19.4381	CAL0001140		CAL0001140	R	C	9	8	439	410	10437	1222	1546	26430	2355	2546	-0.437154	0.177856	0.437154	2.45791	0.098597	-0.339296	-0.437893	1
4203	orf19.223	CAL0003919		CAL0003919	2	W	16	11	278	199	2896	265	297	3876	2388	2400	-0.651938	0.265318	0.651938	2.45719	0.482316	-0.164471	-0.646787	1
1078	orf19.1499	CAL0004783	CTF1	CAL0004783	2	W	11	9	98	52	1778	155	142	2855	3435	3448	-0.786221	0.320172	0.786221	2.45562	0.91427	0.126377	-0.787893	1
3953	orf19.1137	CAL0001967		CAL0001967	1	W	15	8	383	319	1457	406	485	2048	675	729	-0.521869	0.212559	0.521869	2.45517	0.263788	-0.256505	-0.520293	1
6112	orf19.6315	CAL0001262	ADE6	CAL0001262	R	C	1	1	19	17	639	14	47	1353	570	594	-1.93058	0.786839	1.93058	2.45359	0.160465	-1.74723	-1.9077	1
2065	orf19.1575	CAL0005603	PRS1	CAL0005603	2	W	2	2	228	203	8913	394	569	14054	963	1169	-0.708794	0.28925	0.708794	2.45045	0.167554	-0.530233	-0.697787	1
3691	orf19.2111	CAL0005275		CAL0005275	2	C	6	4	134	131	1913	422	632	6490	1146	1173	-0.61424	0.250928	0.61424	2.44787	0.0326662	-0.582682	-0.615348	1
1496	orf19.4173	CAL0005815		CAL0005815	4	C	7	5	20	22	192	27	117	337	1590	1590	-2.00331	0.819097	2.00331	2.44575	-0.137504	-2.11548	-1.97797	1
1575	orf19.382	CAL0004916		CAL0004916	1	W	1	1	12509	2534	849194	57532	9647	5077311	1377	1555	0.271859	0.111226	0.271859	2.4442	2.30348	2.57621	0.272734	1
14	orf19.3912	CAL0002857		CAL0002857	5	C	9	8	143	135	2250	296	441	5321	2049	2154	-0.661772	0.2708	0.661772	2.44377	0.0830557	-0.575181	-0.658237	1
1601	orf19.4204	CAL0000059		CAL0000059	6	W	1	2	202	325	7291	422	437	26141	906	1018	0.629814	0.25779	0.629814	2.44313	-0.686084	-0.0503903	0.635694	1
1934	orf19.328	CAL0004714	NPR2	CAL0004714	3	C	13	10	107	76	1065	75	102	1209	1983	2001	-0.930903	0.381632	0.930903	2.43927	0.493539	-0.443607	-0.937146	1
5537	orf19.4365	CAL0001075		CAL0001075	R	C	10	7	178	201	1908	245	173	2536	1767	1775	0.673562	0.276481	0.673562	2.4362	-0.175318	0.50201	0.677328	1
2566	orf19.2508	CAL0002367	PRM9	CAL0002367	3	C	-1	8	8	30	463	6	5	302	15	16	2.25939	0.929792	2.25939	2.43	-1.90689	0.263034	2.16993	1
4222	orf19.3530	CAL0005868		CAL0005868	2	C	2	2	91	160	4574	140	134	6978	990	1012	0.91757	0.377805	0.91757	2.42869	-0.814133	0.0631938	0.877327	1
1190	orf19.2575	CAL0002524		CAL0002524	R	W	6	6	163	261	2154	183	186	2134	960	970	0.640402	0.263726	0.640402	2.42829	-0.679178	-0.023459	0.655719	1
5206	orf19.5292	CAL0003673		CAL0003673	4	C	15	11	247	192	3308	437	456	6905	2802	2872	-0.430082	0.177175	0.430082	2.42744	0.363405	-0.0614005	-0.424805	1
799	orf19.3304	CAL0004045		CAL0004045	1	C	3	3	138	153	2730	317	228	6877	813	869	0.648695	0.267354	0.648695	2.42635	-0.148863	0.475449	0.624312	1
38	orf19.2850	CAL0005150		CAL0005150	R	W	107	53	958	872	3923	1316	1433	6965	5757	5771	-0.257658	0.10626	0.257658	2.42479	0.135698	-0.122879	-0.258577	1
2910	orf19.2710	CAL0004180		CAL0004180	4	W	3	2	90	99	2558	289	184	5066	645	733	0.802792	0.331179	0.802792	2.42404	-0.137504	0.651364	0.788867	1
2307	orf19.6225	CAL0000460	CAT1	CAL0000460	1	W	10	7	161	170	2106	229	152	3638	2055	2069	0.667844	0.27553	0.667844	2.42385	-0.0784741	0.591276	0.66975	1
4735	orf19.567	CAL0000277	OPT7	CAL0000277	5	C	-1	4	97	67	974	143	187	2603	12	13	-0.935826	0.386552	0.935826	2.42096	0.533824	-0.387023	-0.920847	1
1301	orf19.3363	CAL0004171		CAL0004171	4	C	10	7	482	360	9669	924	932	18460	2130	2278	-0.437457	0.180715	0.437457	2.4207	0.421036	-0.0124371	-0.433473	1
5702	orf19.3999	CAL0003178	GCF1	CAL0003178	5	W	11	6	75	41	845	20	30	320	2304	2318	-1.48612	0.614302	1.48612	2.4192	0.871267	-0.584963	-1.45623	1
1010	orf19.927	CAL0003632		CAL0003632	5	W	1	1	34	19	1081	14	28	1669	612	631	-1.98949	0.822611	1.98949	2.41851	0.839535	-1	-1.83954	1
4285	orf19.5801	CAL0002245	DLD1	CAL0002245	2	C	1	2	587	537	30009	4165	2660	101940	1242	1408	0.51334	0.212546	0.51334	2.41519	0.128438	0.64689	0.518452	1
5560	orf19.2439	CAL0001529		CAL0001529	1	C	2	3	711	788	9071	1808	1418	25597	435	629	0.498551	0.206933	0.498551	2.40924	-0.148346	0.350537	0.498883	1
4211	orf19.2641	CAL0003452	ARP1	CAL0003452	5	W	3	3	44	55	1097	49	27	1737	1245	1260	1.1864	0.494982	1.1864	2.39686	-0.321928	0.859822	1.18175	1
1612	orf19.993	CAL0003844	SNL1	CAL0003844	1	W	6	6	299	374	1700	619	564	2979	525	540	0.454501	0.190038	0.454501	2.39163	-0.322893	0.134244	0.457137	1
5753	orf19.448	CAL0005703	MFALPHA	CAL0005703	1	C	14	8	736	589	4252	1791	1127	11547	1281	1321	0.347349	0.145354	0.347349	2.38968	0.321438	0.668278	0.34684	1
5860	orf19.6628	CAL0003995		CAL0003995	R	W	1	1	11	23	1268	33	23	3226	720	734	1.54976	0.649052	1.54976	2.38772	-1.06413	0.520832	1.58496	1
2987	orf19.3205	CAL0003196	MPRL36	CAL0003196	5	W	1	2	448	322	7327	282	316	19878	633	678	-0.702872	0.294477	0.702872	2.38685	0.476438	-0.164229	-0.640667	1
1425	orf19.6041	CAL0005126		CAL0005126	1	C	3	3	139	129	10376	236	140	24695	3903	4040	0.66166	0.278216	0.66166	2.37822	0.107714	0.75336	0.645646	1
2227	orf19.6369	CAL0001368	DCP2	CAL0001368	R	C	3	1	60	73	6010	151	101	8492	1404	1423	0.883709	0.371725	0.883709	2.37732	-0.282934	0.580193	0.863127	1
3568	orf19.3763	CAL0001243	GSG1	CAL0001243	1	C	4	4	36	52	1207	41	18	542	1380	1391	1.74201	0.734146	1.74201	2.37284	-0.530515	1.18763	1.71814	1
3093	orf19.705	CAL0001703		CAL0001703	R	C	1	1	9	12	1743	64	27	2847	1350	1383	1.75361	0.739363	1.75361	2.37178	-0.415037	1.24511	1.66015	1
4637	orf19.2901	CAL0005940	NUP60	CAL0005940	4	C	15	10	593	405	4189	1118	1009	11673	1836	1888	-0.397421	0.167698	0.397421	2.36986	0.55011	0.147994	-0.402116	1
3167	orf19.3920	CAL0002895		CAL0002895	5	W	2	2	201	155	5716	402	158	6928	900	931	0.929732	0.392984	0.929732	2.36583	0.374927	1.34727	0.972344	1
5543	orf19.2021	CAL0004354	HGT8	CAL0004354	2	W	7	5	1360	1186	20041	1946	945	38539	1653	1830	0.793414	0.335414	0.793414	2.36548	0.197503	1.04213	0.844623	1
2104	orf19.4751	CAL0004475		CAL0004475	1	W	3	2	312	461	6476	844	844	16489	888	997	0.55717	0.23575	0.55717	2.36339	-0.563221	0	0.563221	1
524	orf19.519	CAL0000092		CAL0000092	R	C	1	1	85	19	1444	57	27	2248	588	594	-1.11882	0.473457	1.11882	2.36308	2.16146	1.078	-1.08346	1
3510	orf19.754	CAL0001864		CAL0001864	1	W	8	6	1941	2098	27007	7800	6709	107515	1191	1268	0.328474	0.139169	0.328474	2.36025	-0.112215	0.217376	0.329591	1
950	orf19.3193	CAL0002445	FCR3	CAL0002445	5	W	16	9	150	149	891	1168	1663	7277	1200	1219	-0.519365	0.220233	0.519365	2.35825	0.00965017	-0.509748	-0.519398	1
5448	orf19.4883	CAL0005497	WOR1	CAL0005497	1	C	14	7	22	30	329	34	14	341	2232	2232	1.78301	0.756465	1.78301	2.35703	-0.447459	1.28011	1.72757	1
2447	orf19.3796	CAL0001312		CAL0001312	4	W	16	13	643	697	4285	795	1070	7196	1836	1886	-0.309362	0.131279	0.309362	2.35652	-0.11634	-0.428584	-0.312244	1
5944	orf19.4901	CAL0006196		CAL0006196	1	W	27	3	82	113	309	30	14	97	1035	1035	1.65585	0.702904	1.65585	2.35573	-0.462627	1.09954	1.56216	1
5433	orf19.425	CAL0005616		CAL0005616	1	C	3	3	80	69	959	91	42	854	594	606	0.886913	0.376784	0.886913	2.3539	0.213404	1.11548	0.902074	1
4861	orf19.4188	CAL0005859		CAL0005859	4	C	5	4	219	182	10451	293	354	14583	3054	3097	-0.546164	0.232609	0.546164	2.34799	0.266992	-0.272849	-0.539841	1
1469	orf19.1107	CAL0001857		CAL0001857	5	C	2	2	30	18	678	132	33	1549	609	622	1.29676	0.554587	1.29676	2.33825	0.736966	2	1.26303	1
1027	orf19.2296	CAL0006415		CAL0006415	1	W	49	37	675	728	8734	1318	1186	15482	7656	7732	0.259874	0.111237	0.259874	2.33622	-0.109051	0.152246	0.261297	1
5089	orf19.3358	CAL0004162	ARP8	CAL0004162	1	C	1	2	1932	1771	37957	829	1106	187789	972	1193	-0.528398	0.226865	0.528398	2.32913	0.125531	-0.415907	-0.541438	1
5375	orf19.2538	CAL0002447	PTC2	CAL0002447	R	W	7	7	563	707	10274	913	770	18010	1752	1819	0.574303	0.246718	0.574303	2.32777	-0.328575	0.245756	0.574332	1
1361	orf19.5101	CAL0002486	PLB5	CAL0002486	1	W	6	8	282	243	4346	252	314	9216	2364	2610	-0.532395	0.228746	0.532395	2.32745	0.214739	-0.317341	-0.53208	1
2815	orf19.6348	CAL0001329		CAL0001329	1	W	10	9	109	145	1820	110	86	1647	2826	2838	0.76857	0.33107	0.76857	2.32147	-0.411725	0.355095	0.76682	1
5376	orf19.862	CAL0002808	RAD32	CAL0002808	2	C	4	4	31	20	321	81	110	936	711	717	-1.06785	0.460736	1.06785	2.31771	0.632268	-0.44151	-1.07378	1
3199	orf19.3456	CAL0005012	SWD3	CAL0005012	6	W	10	7	87	49	888	26	38	445	1671	1684	-1.39929	0.60383	1.39929	2.31735	0.828234	-0.547488	-1.37572	1
2958	orf19.2594	CAL0002566		CAL0002566	R	W	4	3	526	347	5706	764	662	15573	900	919	-0.394962	0.170445	0.394962	2.31724	0.600127	0.206741	-0.393386	1
3948	orf19.3148	CAL0002321		CAL0002321	2	W	4	6	18	38	1192	65	56	3751	2583	2606	1.31563	0.567926	1.31563	2.31655	-1.078	0.215013	1.29302	1
6078	orf19.847	CAL0002754	GPX2	CAL0002754	2	W	2	2	55	44	2663	294	439	8823	1089	1108	-0.874808	0.378276	0.874808	2.31262	0.321928	-0.578405	-0.900333	1
4368	orf19.1753	CAL0000869	PUS7	CAL0000869	2	W	10	8	726	523	8531	608	606	14209	2280	2305	-0.466496	0.201938	0.466496	2.3101	0.473159	0.00475353	-0.468405	1
3122	orf19.1942	CAL0002583	SGE1	CAL0002583	5	W	9	7	56	42	935	105	38	831	1884	1899	1.06243	0.461843	1.06243	2.30041	0.415037	1.46632	1.05128	1
5482	orf19.4468	CAL0001921		CAL0001921	1	W	1	3	2498	2446	33059	905	613	42751	510	763	0.508523	0.221432	0.508523	2.29652	0.0303491	0.562031	0.531682	1
5910	orf19.603	CAL0000877	SPE1	CAL0000877	R	W	1	1	76	68	4082	37	71	14527	852	902	-1.11566	0.486094	1.11566	2.29516	0.160465	-0.940294	-1.10076	1
2930	orf19.2007	CAL0004322		CAL0004322	2	C	22	13	313	235	3060	177	197	3028	2937	2949	-0.564572	0.246077	0.564572	2.29429	0.413502	-0.154446	-0.567948	1
4236	orf19.6506	CAL0003038		CAL0003038	7	W	2	2	28	16	1487	31	54	3099	2067	2081	-1.53258	0.668161	1.53258	2.29373	0.807355	-0.800691	-1.60805	1
2734	orf19.2520	CAL0002406		CAL0002406	R	C	5	4	786	576	10739	1180	1101	21039	963	1023	-0.351632	0.153463	0.351632	2.29131	0.448461	0.0999724	-0.348488	1
2580	orf19.1886	CAL0001795	RCL1	CAL0001795	2	C	10	5	441	449	4500	514	368	8731	1116	1170	0.493886	0.216032	0.493886	2.28617	-0.0259368	0.482063	0.507999	1
5169	orf19.1800	CAL0001572		CAL0001572	4	C	21	13	73	51	326	87	29	385	1329	1338	1.09431	0.478675	1.09431	2.28611	0.517399	1.58496	1.06756	1
5625	orf19.1994	CAL0002741		CAL0002741	2	W	8	6	66	57	1226	60	102	1259	2046	2071	-0.988966	0.432664	0.988966	2.28576	0.211504	-0.765535	-0.977039	1
5218	orf19.2555	CAL0002481	URA5	CAL0002481	R	W	3	3	809	725	11284	443	259	15380	657	768	0.611773	0.268477	0.611773	2.27868	0.158159	0.774355	0.616196	1
439	orf19.3585	CAL0006000		CAL0006000	2	W	0	1	75	49	2801	33	52	10476	393	480	-1.40313	0.616032	1.40313	2.27769	0.614109	-0.656046	-1.27015	1
2410	orf19.1864	CAL0001731		CAL0001731	2	C	21	13	377	316	3112	696	767	6073	2160	2165	-0.393657	0.172872	0.393657	2.27716	0.25464	-0.140139	-0.394779	1
5997	orf19.3707	CAL0001071	SAP2	CAL0001071	R	C	7	8	5884	4647	43771	5412	5176	56463	1197	1391	-0.277016	0.121944	0.277016	2.27167	0.340498	0.0643242	-0.276173	1
5450	orf19.4983	CAL0000009		CAL0000009	1	C	2	2	79	114	1664	195	179	4420	816	837	0.660058	0.290884	0.660058	2.26915	-0.529109	0.123515	0.652624	1
855	orf19.4371	CAL0001103		CAL0001103	R	W	3	4	1775	1407	39833	11415	7867	172886	972	1111	0.196435	0.086592	0.196435	2.26851	0.335197	0.537045	0.201849	1
6066	orf19.1368	CAL0003888		CAL0003888	2	W	15	10	20	12	184	20	39	439	1827	1840	-1.76204	0.779463	1.76204	2.26058	0.736966	-0.963474	-1.70044	1
4552	orf19.1300	CAL0003697		CAL0003697	4	C	3	3	88	141	3427	156	142	4740	1335	1350	0.837089	0.370731	0.837089	2.25794	-0.68012	0.135655	0.815775	1
405	orf19.6883	CAL0005899		CAL0005899	2	C	6	5	408	398	8279	1719	1180	17424	1293	1412	0.522924	0.231678	0.522924	2.25712	0.0358007	0.542783	0.506982	1
3004	orf19.2299	CAL0006418		CAL0006418	1	C	5	2	519	433	3613	929	1069	5637	306	396	-0.464685	0.206175	0.464685	2.25384	0.261368	-0.202511	-0.463879	1
1767	orf19.3946	CAL0002981		CAL0002981	5	C	2	3	62	67	1840	148	85	1957	885	990	0.910701	0.404118	0.910701	2.25355	-0.111893	0.800062	0.911955	1
3660	orf19.3996	CAL0003175	ADH1	CAL0003175	5	W	6	6	92	99	2018	81	48	1033	1449	1459	0.858419	0.381595	0.858419	2.24956	-0.105795	0.754888	0.860682	1
1857	orf19.4337	CAL0000990	VPS4	CAL0000990	5	C	-1	13	117	247	1069	129	173	988	2022	2016	0.658484	0.29312	0.658484	2.24647	-1.078	-0.423401	0.654602	1
1785	orf19.2014	CAL0004334	BCY1	CAL0004334	2	C	8	7	775	829	8691	2508	2267	26581	1380	1409	0.248328	0.110656	0.248328	2.24414	-0.0971758	0.145753	0.242929	1
4062	orf19.4341	CAL0001012	SUT1	CAL0001012	5	W	16	8	349	271	2664	245	280	2086	1449	1464	-0.55255	0.246277	0.55255	2.24361	0.364934	-0.192645	-0.557579	1
4433	orf19.410.3	CAF0006895		CAF0006895	1	W	6	2	450	284	8027	493	489	16670	621	622	-0.63655	0.283739	0.63655	2.24343	0.664034	0.0117532	-0.652281	1
1365	orf19.4516	CAL0002657		CAL0002657	2	C	3	2	45	75	3824	142	115	5766	1545	1557	1.03623	0.461988	1.03623	2.24298	-0.736966	0.304257	1.04122	1
3553	orf19.4746	CAL0004454	HEM14	CAL0004454	1	C	23	15	813	830	4273	1016	1273	7680	1629	1669	-0.295418	0.131804	0.295418	2.24134	-0.029856	-0.325332	-0.295476	1
4779	orf19.5620	CAL0000581	ARP4	CAL0000581	6	W	5	5	458	475	5259	1138	880	8605	930	971	0.438346	0.195793	0.438346	2.23882	-0.0525799	0.370925	0.423505	1
5897	orf19.3519	CAL0005818		CAL0005818	R	W	6	4	5	41	267	8	12	163	1041	1041	2.59564	1.16011	2.59564	2.2374	-3.03562	-0.584963	2.45066	1
3894	orf19.1670	CAL0000103	BRO1	CAL0000103	3	C	11	8	76	64	1806	268	137	3353	2838	2855	0.720207	0.321981	0.720207	2.2368	0.247928	0.968057	0.72013	1
70	orf19.2473	CAL0001606		CAL0001606	1	W	7	6	213	161	3232	162	186	6392	1905	1941	-0.600491	0.268635	0.600491	2.23534	0.403793	-0.199309	-0.603102	1
3276	orf19.2018.1	CAF0007440		CAF0007440	2	W	2	2	28	15	231	23	34	251	315	316	-1.47599	0.660589	1.47599	2.23436	0.900464	-0.563901	-1.46437	1
76	orf19.3393	CAL0004220		CAL0004220	6	C	8	5	257	248	4779	1107	793	15288	1725	1741	0.425649	0.190666	0.425649	2.23243	0.0514282	0.481262	0.429834	1
6002	orf19.3043	CAL0001409		CAL0001409	1	W	4	4	19	46	772	39	35	1082	1056	1117	1.47871	0.662617	1.47871	2.23161	-1.27563	0.156119	1.43175	1
1145	orf19.2919	CAL0005976	MPH1	CAL0005976	4	C	34	25	124	211	1204	181	205	1414	3564	3564	0.588797	0.264143	0.588797	2.22908	-0.766903	-0.179634	0.587269	1
3449	orf19.815	CAL0002646	SDS22	CAL0002646	2	C	7	5	47	24	4925	85	95	7621	5745	5757	-1.14089	0.512023	1.14089	2.22821	0.969626	-0.160465	-1.13009	1
5552	orf19.2484	CAL0001633		CAL0001633	1	W	2	2	256	315	8376	277	240	6994	1254	1295	0.511656	0.229728	0.511656	2.22723	-0.299208	0.206852	0.50606	1
4608	orf19.2156	CAL0005371	NAG1	CAL0005371	6	C	12	8	117	103	477	127	181	625	747	765	-0.701568	0.316175	0.701568	2.21892	0.183864	-0.511161	-0.695025	1
1462	orf19.4704	CAL0004346		CAL0004346	4	W	22	16	1759	1809	22479	3374	3015	67578	4656	4725	0.203258	0.091681	0.203258	2.21701	-0.0404369	0.162302	0.202739	1
1031	orf19.1199	CAL0002164	NOP5	CAL0002164	6	C	7	7	1699	1729	24851	3770	4478	83822	1551	1773	-0.224706	0.101468	0.224706	2.21455	-0.025252	-0.24829	-0.223038	1
4603	orf19.4122	CAL0005629		CAL0005629	2	C	2	2	38	28	988	62	110	2493	981	992	-1.2549	0.568179	1.2549	2.20863	0.440573	-0.827163	-1.26774	1
3263	orf19.57	CAL0000607		CAL0000607	1	C	-1	4	181	78	997	236	158	1881	492	493	-0.636137	0.288155	0.636137	2.20762	1.21444	0.578862	-0.635581	1
3104	orf19.2318.1	CAF0006945		CAF0006945	1	W	2	2	183	117	2736	53	65	1946	696	697	-0.953815	0.43215	0.953815	2.20714	0.645335	-0.294447	-0.939782	1
1231	orf19.3603	CAL0000273		CAL0000273	2	W	6	4	83	72	1844	158	222	5139	2277	2359	-0.713118	0.324618	0.713118	2.19679	0.205114	-0.490635	-0.69575	1
526	orf19.5530	CAL0006136		CAL0006136	6	W	21	15	284	250	2580	1587	1798	15453	2511	2532	-0.367038	0.16712	0.367038	2.19625	0.183963	-0.180091	-0.364054	1
5042	orf19.2727	CAL0004203	GRX3	CAL0004203	4	C	1	2	237	174	7404	209	260	17457	762	984	-0.751639	0.342916	0.751639	2.1919	0.4458	-0.315009	-0.760808	1
1543	orf19.4777	CAL0004557	LYS142	CAL0004557	1	C	13	7	2611	2424	31446	1957	1582	27741	1788	1889	0.20091	0.091672	0.20091	2.19162	0.107213	0.306894	0.199681	1
1150	orf19.3008	CAL0001333	COQ4	CAL0001333	1	C	5	5	232	285	3601	332	289	3524	972	984	0.504731	0.230473	0.504731	2.18998	-0.296837	0.200114	0.496951	1
1012	orf19.2947	CAL0006040	SNZ1	CAL0006040	1	C	3	4	1270	1350	13213	1456	1254	48011	879	1111	0.304266	0.1391	0.304266	2.18739	-0.0881309	0.215473	0.303604	1
3593	orf19.3002	CAL0001324	RPS1	CAL0001324	1	W	2	3	11678	11642	270882	33490	43898	753413	771	983	-0.393667	0.18045	0.393667	2.18158	0.00445429	-0.390425	-0.394879	1
1633	orf19.934	CAL0003659		CAL0003659	5	C	1	1	42	38	1132	76	140	1935	324	376	-0.988324	0.453392	0.988324	2.17984	0.14439	-0.881356	-1.02575	1
4564	orf19.6346	CAL0001325	RVS162	CAL0001325	1	W	2	3	363	202	6838	104	110	10126	966	1058	-0.888909	0.40859	0.888909	2.17555	0.845614	-0.08092	-0.926534	1
1354	orf19.4339	CAL0000992	PRD1	CAL0000992	5	W	14	5	200	175	2653	412	512	5462	1320	1334	-0.509246	0.234198	0.509246	2.17443	0.192645	-0.313499	-0.506145	1
3033	orf19.5533	CAL0006139		CAL0006139	6	C	11	7	80	73	1092	233	334	4788	2298	2328	-0.650477	0.299312	0.650477	2.17324	0.132104	-0.519518	-0.651622	1
4854	orf19.5730	CAL0001417	POP2	CAL0001417	6	C	11	7	106	155	1250	83	196	1291	1542	1556	-0.695799	0.320412	0.695799	2.17158	-0.548204	-1.23967	-0.691466	1
1579	orf19.2711.1	CAF0006963	MED20	CAF0006963	4	C	-1	4	97	108	1143	185	123	1652	66	67	0.732256	0.337327	0.732256	2.17076	-0.154975	0.588867	0.743842	1
5930	orf19.4162	CAL0005779		CAL0005779	4	C	19	9	36	57	606	86	66	905	2154	2154	1.03532	0.477637	1.03532	2.16759	-0.662965	0.381871	1.04484	1
3716	orf19.6353	CAL0001337		CAL0001337	1	W	-1	9	53	44	412	34	6	125	2079	2093	2.20459	1.01735	2.20459	2.167	0.268489	2.5025	2.23401	1
536	orf19.3207	CAL0003199	CCN1	CAL0003199	5	C	8	7	115	110	2172	81	134	2839	2082	2111	-0.790682	0.36491	0.790682	2.16679	0.0641303	-0.726239	-0.79037	1
3298	orf19.6387	CAL0001410		CAL0001410	R	C	9	8	925	860	11428	1279	1493	38218	2700	2777	-0.330391	0.152827	0.330391	2.16186	0.105117	-0.223198	-0.328315	1
3779	orf19.1153	CAL0002044	GAD1	CAL0002044	1	W	5	4	836	894	22082	964	1226	27633	1707	1810	-0.247071	0.114398	0.247071	2.15975	-0.0967719	-0.346854	-0.250082	1
5253	orf19.1841	CAL0001674		CAL0001674	R	W	14	9	85	149	583	98	91	584	1125	1140	0.926034	0.429001	0.926034	2.15858	-0.809778	0.106915	0.916693	1
4588	orf19.5626	CAL0000590	QCR7	CAL0000590	6	W	5	6	9	25	254	76	77	882	1230	1243	1.50852	0.698857	1.50852	2.15855	-1.47393	-0.018859	1.45507	1
765	orf19.1291	CAL0003102	ABZ1	CAL0003102	4	W	12	10	300	385	4904	209	191	5438	2469	2469	0.493917	0.229289	0.493917	2.15412	-0.359896	0.12993	0.489826	1
2789	orf19.2736	CAL0004217	HFL2	CAL0004217	4	C	9	3	440	390	2425	719	853	5858	441	569	-0.424031	0.196866	0.424031	2.15391	0.174029	-0.246554	-0.420583	1
5773	orf19.2474	CAL0001608	PRC3	CAL0001608	1	C	11	10	238	280	3095	305	252	4152	1653	1751	0.503632	0.233893	0.503632	2.15326	-0.234465	0.275386	0.509851	1
2113	orf19.5220	CAL0003518		CAL0003518	1	W	2	2	19	29	779	68	30	2068	858	872	1.82282	0.846996	1.82282	2.1521	-0.610053	1.18057	1.79063	1
5406	orf19.88	CAL0000685	HSP78	CAL0000685	6	C	4	3	3044	2588	61290	7084	8226	241777	1203	1445	-0.425126	0.197743	0.425126	2.14989	0.234131	-0.215627	-0.449758	1
5377	orf19.1878	CAL0001770	MED4	CAL0001770	2	C	4	3	62	76	1090	179	127	2770	972	981	0.809619	0.376759	0.809619	2.1489	-0.293731	0.495131	0.788862	1
1589	orf19.5723	CAL0001396		CAL0001396	6	W	9	7	52	43	884	55	17	663	1992	1992	1.43108	0.666552	1.43108	2.14698	0.274175	1.6939	1.41972	1
3259	orf19.3787	CAL0001300	SPC34	CAL0001300	4	W	9	10	281	295	2478	694	573	5580	1119	1167	0.344385	0.160529	0.344385	2.14531	-0.0701448	0.276401	0.346545	1
2039	orf19.5750	CAL0001464	HGT10	CAL0001464	6	C	8	4	3572	3234	47338	15229	11521	191030	1413	1496	0.248249	0.11574	0.248249	2.14489	0.143412	0.402555	0.259143	1
3496	orf19.6375	CAL0001384	TRM9	CAL0001384	R	W	0	3	15117	18132	209338	159	141	444458	360	758	0.435524	0.203093	0.435524	2.14446	-0.262366	0.173332	0.435698	1
1960	orf19.879	CAL0002867	DFG16	CAL0002867	2	C	13	10	92	85	1181	63	108	1323	2328	2328	-0.913492	0.427069	0.913492	2.13898	0.114171	-0.777608	-0.891779	1
1347	orf19.2884	CAL0005222	CDC68	CAL0005222	4	W	7	7	371	406	11718	1038	919	34253	3183	3230	0.30654	0.143439	0.30654	2.13708	-0.130061	0.17567	0.30573	1
2348	orf19.3749	CAL0001204		CAL0001204	R	C	7	6	28	15	358	5	16	203	2718	2718	-2.58353	1.20895	2.58353	2.13701	0.900464	-1.67807	-2.57854	1
5297	orf19.3322	CAL0004091	DUT1	CAL0004091	1	C	2	3	560	494	6258	2159	2297	20486	480	511	-0.274856	0.128866	0.274856	2.13288	0.180916	-0.0893876	-0.270303	1
151	orf19.1742	CAL0000854	HEM3	CAL0000854	2	C	1	1	67	83	4012	88	49	11623	1023	1088	1.14372	0.536309	1.14372	2.13258	-0.30895	0.844722	1.15367	1
4066	orf19.5170	CAL0002653	PMT1	CAL0002653	7	W	3	5	497	434	18450	112	140	14073	2916	3374	-0.531747	0.249678	0.531747	2.12973	0.195551	-0.321928	-0.517479	1
64	orf19.828	CAL0002685	GPI13	CAL0002685	2	W	8	5	844	1285	8346	2481	3171	18980	798	848	0.248689	0.116786	0.248689	2.12944	-0.606453	-0.354016	0.252437	1
2114	orf19.4728	CAL0004407	TPO4	CAL0004407	1	W	15	13	319	244	5643	468	485	9010	4146	4157	-0.44207	0.20773	0.44207	2.1281	0.386675	-0.0514762	-0.438151	1
1634	orf19.1805	CAL0001580	PEX14	CAL0001580	R	W	11	12	434	689	3732	533	634	7082	1359	1377	0.414288	0.194679	0.414288	2.12806	-0.666809	-0.250347	0.416462	1
4044	orf19.407	CAL0005543		CAL0005543	1	C	9	7	408	468	6623	383	570	12428	2199	2240	-0.377423	0.177831	0.377423	2.12237	-0.197939	-0.573618	-0.375678	1
5890	orf19.2948	CAL0006041	SNO1	CAL0006041	1	W	12	8	689	438	2582	1000	776	4595	750	776	-0.287121	0.135317	0.287121	2.12184	0.653573	0.365871	-0.287702	1
4179	orf19.6167	CAL0006073		CAL0006073	3	C	8	6	245	200	2338	697	780	5239	882	949	-0.453341	0.2138	0.453341	2.1204	0.292782	-0.162315	-0.455097	1
4200	orf19.2746	CAL0004231	EMP70	CAL0004231	4	C	6	7	1334	1500	20612	522	459	17425	1893	2113	0.356606	0.168314	0.356606	2.11869	-0.169204	0.185556	0.354759	1
5782	orf19.6925	CAL0000206	SAP9	CAL0000206	3	C	1	1	518	640	17939	3659	3825	124582	393	564	0.230381	0.10893	0.230381	2.11495	-0.30512	-0.0640103	0.241109	1
1823	orf19.2311	CAL0000666	RPL82	CAL0000666	1	W	2	2	1090	880	24614	3167	1730	106206	783	784	0.560814	0.26551	0.560814	2.11221	0.308753	0.872345	0.563592	1
120	orf19.6685	CAL0004135		CAL0004135	7	C	1	1	22	12	1048	15	20	1553	801	820	-1.26905	0.600952	1.26905	2.11174	0.874469	-0.415037	-1.28951	1
4903	orf19.4793	CAL0004612		CAL0004612	1	W	5	5	261	180	1585	939	835	6401	600	627	-0.375407	0.177931	0.375407	2.10985	0.536053	0.169349	-0.366704	1
1497	orf19.431	CAL0005650		CAL0005650	1	C	4	4	38	39	1275	20	49	2863	2328	2341	-1.27397	0.604034	1.27397	2.10911	-0.0374747	-1.29278	-1.25531	1
4078	orf19.4981	CAL0000007		CAL0000007	1	C	14	10	88	72	722	42	11	366	2115	2115	1.757	0.833738	1.757	2.10738	0.289507	1.93289	1.64338	1
43	orf19.1261	CAL0002984	CGT1	CAL0002984	4	W	6	6	141	184	2358	361	331	5444	1350	1363	0.494324	0.234667	0.494324	2.10649	-0.384011	0.125168	0.509178	1
1876	orf19.5760	CAL0001488	SKI8	CAL0001488	6	C	15	12	177	236	1129	895	1556	8755	1179	1190	-0.384749	0.182679	0.384749	2.10615	-0.415037	-0.797882	-0.382845	1
2680	orf19.3617	CAL0000319	YWP1	CAL0000319	2	W	3	3	86	77	1361	102	40	2330	1059	1074	1.19886	0.569941	1.19886	2.10347	0.159478	1.3505	1.19102	1
2139	orf19.1690	CAL0000187	TOS1	CAL0000187	3	C	12	9	1869	1219	12813	5443	4320	37064	1407	1677	-0.281101	0.133822	0.281101	2.10056	0.616568	0.333371	-0.283198	1
1670	orf19.1082.1	CAF0006920		CAF0006920	6	W	1	1	389	372	15294	4526	5413	88366	252	652	-0.344985	0.164303	0.344985	2.09969	0.0644675	-0.258192	-0.322659	1
4029	orf19.679	CAL0001107	RRD1	CAL0001107	1	W	2	3	162	156	1846	331	201	2324	564	623	0.665409	0.317314	0.665409	2.097	0.0544478	0.719636	0.665188	1
5387	orf19.600	CAL0000875	RPL8B	CAL0000875	R	C	13	13	153	122	1489	66	91	1243	3171	3184	-0.791985	0.37777	0.791985	2.09647	0.326651	-0.463401	-0.790051	1
2178	orf19.3894	CAL0002203	CHT2	CAL0002203	5	C	5	4	41	39	636	25	54	800	1023	1028	-1.19107	0.568395	1.19107	2.09549	0.0721498	-1.11103	-1.18318	1
4254	orf19.426	CAL0005618	TIF5	CAL0005618	1	C	9	6	288	315	4236	138	219	3370	2055	2072	-0.530754	0.253567	0.530754	2.09315	-0.129283	-0.666263	-0.53698	1
514	orf19.1880	CAL0001790	HEM15	CAL0001790	2	W	1	2	298	274	13690	411	263	13839	1161	1365	0.525832	0.251408	0.525832	2.09155	0.121136	0.644076	0.522939	1
214	orf19.3870	CAL0002147	DAD3	CAL0002147	R	C	8	7	3000	3069	37173	5124	4382	72444	1449	1620	0.25201	0.120569	0.25201	2.09017	-0.0328061	0.225681	0.258487	1
2189	orf19.2124	CAL0005303		CAL0005303	6	C	6	5	16	40	412	44	44	479	1071	1071	1.3286	0.635887	1.3286	2.08937	-1.32193	0	1.32193	1
4069	orf19.4264	CAL0000287	UAP1	CAL0000287	5	W	4	3	22	34	338	8	31	601	906	920	-1.34677	0.644957	1.34677	2.08815	-0.628031	-1.9542	-1.32617	1
2813	orf19.2551	CAL0002475	MET6	CAL0002475	R	C	18	10	6082	4894	56090	33144	30123	326195	2304	2732	-0.176021	0.084438	0.176021	2.08462	0.313532	0.137882	-0.175649	1
5193	orf19.5630	CAL0000610	PGA7	CAL0000610	6	C	3	1	154	183	6843	260	206	12252	1101	1135	0.572236	0.274594	0.572236	2.08393	-0.248913	0.335867	0.584781	1
679	orf19.6046	CAL0005130		CAL0005130	1	W	16	11	60	64	1961	58	27	1119	4608	4622	1.19837	0.57529	1.19837	2.08307	-0.0931094	1.10309	1.1962	1
4430	orf19.1361	CAL0003881	TIM23	CAL0003881	2	C	1	2	320	339	10912	357	639	25956	657	841	-0.767626	0.368579	0.767626	2.08266	-0.0832134	-0.839892	-0.756678	1
3656	orf19.5519	CAL0006098	ISA1	CAL0006098	6	C	14	9	2750	1782	14310	2175	1675	20392	1185	1248	-0.253814	0.122066	0.253814	2.07932	0.625934	0.376854	-0.24908	1
3550	orf19.1910	CAL0002513		CAL0002513	2	W	2	2	27	28	612	64	26	624	624	631	1.39022	0.669245	1.39022	2.0773	-0.0524674	1.29956	1.35203	1
2784	orf19.4293	CAL0000383		CAL0000383	5	C	5	5	226	290	3533	271	252	5716	1152	1165	0.462827	0.222856	0.462827	2.0768	-0.35973	0.104869	0.464599	1
5727	orf19.1169	CAL0002076		CAL0002076	1	C	6	4	33	40	328	41	17	377	951	951	1.61677	0.780079	1.61677	2.07257	-0.277534	1.27009	1.54762	1
1642	orf19.5510	CAL0006086		CAL0006086	6	W	18	10	171	261	4568	229	247	5120	3858	3907	0.511653	0.247722	0.511653	2.06543	-0.610053	-0.109163	0.50089	1
4241	orf19.3325.3	CAF0006982	RPS21B	CAF0006982	1	C	-1	1	5023	5167	68903	31752	28574	289301	240	241	0.186138	0.09014	0.186138	2.06499	-0.0407776	0.152144	0.192922	1
1214	orf19.1773	CAL0000930	RAP1	CAL0000930	2	W	5	4	98	115	2215	195	147	4445	1293	1319	0.645988	0.312951	0.645988	2.06418	-0.23078	0.407658	0.638438	1
782	orf19.794	CAL0002024	BAT21	CAL0002024	2	W	18	9	74	56	993	193	238	1517	1827	1861	-0.70511	0.341638	0.70511	2.06391	0.402098	-0.302361	-0.704459	1
1181	orf19.4795	CAL0004615		CAL0004615	1	C	29	17	59	47	391	13	33	361	3501	3501	-1.75531	0.850785	1.75531	2.06316	0.328054	-1.34395	-1.67201	1
1135	orf19.4146	CAL0005718	GLR1	CAL0005718	5	W	8	3	591	586	1896	2167	1769	5889	321	353	0.270175	0.130967	0.270175	2.06292	0.0122575	0.292765	0.280508	1
5380	orf19.3663	CAL0000434		CAL0000434	1	C	12	8	354	344	5420	213	284	6405	2583	2782	-0.454401	0.220281	0.454401	2.06282	0.0413408	-0.415037	-0.456378	1
3932	orf19.3457	CAL0005013		CAL0005013	6	C	12	10	215	213	1560	299	196	1660	1152	1158	0.595832	0.288853	0.595832	2.06275	0.0134832	0.609292	0.595809	1
1349	orf19.6030	CAL0005097	CMP1	CAL0005097	1	W	5	4	296	299	2357	529	315	4294	663	695	0.720937	0.349771	0.720937	2.06117	-0.0145483	0.747916	0.762464	1
2164	orf19.4748	CAL0004460		CAL0004460	1	C	3	3	69	70	460	157	96	1336	396	414	0.75474	0.366397	0.75474	2.0599	-0.0207586	0.709658	0.730417	1
3868	orf19.2278	CAL0006349		CAL0006349	2	W	2	2	245	205	6084	185	232	8778	795	822	-0.600444	0.291601	0.600444	2.05913	0.257158	-0.3266	-0.583757	1
186	orf19.107	CAL0002969		CAL0002969	6	C	73	22	1242	1105	3729	846	914	5467	2496	2513	-0.280713	0.136451	0.280713	2.05724	0.168619	-0.111537	-0.280155	1
3561	orf19.3496	CAL0005122		CAL0005122	6	W	-1	15	1240	1178	22991	3617	2837	85974	5007	5251	0.270341	0.13143	0.270341	2.05692	0.0740006	0.350427	0.276427	1
4531	orf19.1420	CAL0004514		CAL0004514	4	C	1	1	20	13	833	21	40	780	828	831	-1.58246	0.769833	1.58246	2.05559	0.621488	-0.929611	-1.5511	1
5344	orf19.5077	CAL0001760		CAL0001760	1	W	2	2	657	737	14429	854	766	27858	501	735	0.304336	0.148184	0.304336	2.05377	-0.165771	0.156892	0.322663	1
5973	orf19.1179	CAL0002101		CAL0002101	6	C	1	1	372	401	9361	944	1388	14326	333	354	-0.438349	0.21364	0.438349	2.05181	-0.1083	-0.556149	-0.447849	1
2014	orf19.1953	CAL0002599		CAL0002599	5	W	9	6	235	391	2750	566	742	5054	1113	1130	0.344204	0.168117	0.344204	2.04741	-0.734508	-0.390617	0.343891	1
5286	orf19.1374	CAL0003910		CAL0003910	2	W	1	1	38	26	1388	90	134	2907	573	665	-1.13933	0.556531	1.13933	2.04721	0.547488	-0.574236	-1.12172	1
2915	orf19.391	CAL0004944		CAL0004944	1	C	6	5	95	117	2687	19	47	1511	2139	2139	-1.01483	0.496174	1.01483	2.0453	-0.300509	-1.30666	-1.00615	1
3708	orf19.1680	CAL0000146	TFP1	CAL0000146	3	W	7	5	716	444	10489	1458	1170	67529	1854	1855	-0.365734	0.179189	0.365734	2.04105	0.6894	0.317482	-0.371918	1
5301	orf19.5746	CAL0001447	SBA1	CAL0001447	6	W	12	10	1644	1840	31440	5714	5674	89887	2910	2938	0.172004	0.084361	0.172004	2.0389	-0.162495	0.0101349	0.17263	1
3529	orf19.1310	CAL0003720		CAL0003720	4	C	15	11	107	92	743	44	75	500	1632	1858	-0.992638	0.487138	0.992638	2.03769	0.217905	-0.769387	-0.987292	1
189	orf19.5823	CAL0002299		CAL0002299	2	C	6	4	459	596	9615	2929	2940	42920	1035	1159	0.36323	0.178595	0.36323	2.03382	-0.376818	-0.00540796	0.37141	1
3917	orf19.3007.2	CAF0006971		CAF0006971	1	C	-1	4	149	194	1996	290	272	2784	630	631	0.477141	0.234765	0.477141	2.03242	-0.380744	0.0924462	0.473191	1
2605	orf19.2785	CAL0004289	ATP7	CAL0004289	1	W	2	3	3942	4293	61099	5770	7093	148870	525	724	-0.176016	0.086605	0.176016	2.0324	-0.123058	-0.297825	-0.174766	1
5431	orf19.2113	CAL0005278		CAL0005278	2	C	5	5	176	159	3082	316	407	5182	1389	1398	-0.509678	0.250778	0.509678	2.03239	0.146549	-0.365104	-0.511653	1
2284	orf19.227	CAL0003929	COX7	CAL0003929	3	C	1	3	2912	2105	26924	4229	4483	57150	330	763	-0.540938	0.266295	0.540938	2.03135	0.46819	-0.0841479	-0.552338	1
2008	orf19.4645	CAL0003701	UEC1	CAL0003701	4	W	4	5	112	75	3202	257	284	7452	1899	1949	-0.724433	0.356653	0.724433	2.0312	0.578536	-0.144123	-0.722659	1
4076	orf19.775	CAL0001943	HAT1	CAL0001943	1	C	30	13	124	103	1081	54	80	486	2736	2748	-0.84638	0.416704	0.84638	2.03113	0.267696	-0.567041	-0.834736	1
2975	orf19.873.1	CAF0006913	PGA33	CAF0006913	2	C	-1	2	902	1063	12035	4654	7946	87659	6	7	-0.529207	0.26063	0.529207	2.03049	-0.236942	-0.771758	-0.534815	1
959	orf19.4379	CAL0001123		CAL0001123	R	W	28	17	485	286	2929	421	178	3017	2604	2617	0.484844	0.239182	0.484844	2.02709	0.76197	1.24194	0.479973	1
1095	orf19.2959.1	CAF0006969		CAF0006969	1	C	1	2	600	461	4893	168	202	4858	174	362	-0.623305	0.308233	0.623305	2.02219	0.380196	-0.265894	-0.64609	1
4555	orf19.3163	CAL0002365		CAL0002365	5	W	10	4	59	78	582	157	120	1185	987	1002	0.784913	0.388494	0.784913	2.0204	-0.402759	0.38773	0.790489	1
3418	orf19.2151	CAL0005364	NAG6	CAL0005364	6	W	15	13	375	365	3842	596	738	6833	2373	2387	-0.353061	0.174985	0.353061	2.01766	0.0389941	-0.308308	-0.347303	1
339	orf19.6286	CAL0000597		CAL0000597	R	C	9	7	358	253	1365	365	381	1804	597	659	-0.560826	0.277973	0.560826	2.01756	0.500822	-0.0618945	-0.562717	1
3923	orf19.1332	CAL0003788	SNG4	CAL0003788	7	W	2	1	29	21	1606	22	51	1987	1662	1675	-1.66478	0.825233	1.66478	2.01735	0.465664	-1.21299	-1.67866	1
4446	orf19.4143	CAL0005712		CAL0005712	5	W	3	2	140	124	1008	487	309	4239	429	459	0.481848	0.239324	0.481848	2.01337	0.175087	0.656315	0.481228	1
493	orf19.1168	CAL0002075	ZCF3	CAL0002075	1	C	6	5	474	556	3452	1139	1646	12507	588	631	-0.302356	0.150386	0.302356	2.01053	-0.230198	-0.531197	-0.300999	1
1241	orf19.2287	CAL0006382	RPA12	CAL0006382	2	C	4	3	538	423	3382	1839	1179	9886	372	409	0.292568	0.145518	0.292568	2.01053	0.346949	0.641358	0.294409	1
5833	orf19.3812	CAL0001942		CAL0001942	4	W	3	3	1141	1107	28431	1598	1215	141210	1623	1714	0.360797	0.179724	0.360797	2.00751	0.0436436	0.395311	0.351668	1
3892	orf19.6527	CAL0003125		CAL0003125	7	C	7	5	43	42	1761	94	47	2531	3318	3327	0.974285	0.485536	0.974285	2.00662	0.0339473	1	0.966053	1
2414	orf19.3045	CAL0001411		CAL0001411	1	C	2	1	136	133	5098	119	175	9625	1437	1468	-0.607571	0.30285	0.607571	2.00618	0.0321804	-0.556393	-0.588574	1
3236	orf19.640	CAL0001003		CAL0001003	R	W	1	1	35	28	1199	12	27	1720	714	729	-1.62835	0.813061	1.62835	2.00274	0.321928	-1.16993	-1.49185	1
3169	orf19.4118	CAL0005596	SPO72	CAL0005596	2	W	8	8	643	486	9542	254	138	7940	1827	2054	0.476499	0.237962	0.476499	2.00242	0.403862	0.88016	0.476298	1
2235	orf19.2455	CAL0001559		CAL0001559	1	C	11	12	186	198	3181	125	192	3233	3396	3518	-0.531129	0.265611	0.531129	1.99965	-0.0901978	-0.619178	-0.52898	1
5880	orf19.3174	CAL0002395	CDC24	CAL0002395	5	C	15	10	182	160	2459	432	518	6654	2535	2560	-0.448201	0.224631	0.448201	1.99528	0.185867	-0.261921	-0.447787	1
527	orf19.4160	CAL0005771		CAL0005771	4	C	4	3	70	72	2021	35	68	1187	1353	1353	-0.949074	0.475857	0.949074	1.99445	-0.040642	-0.95818	-0.917538	1
450	orf19.475	CAL0005798		CAL0005798	R	W	5	5	190	208	2505	211	159	4937	1101	1122	0.53987	0.272993	0.53987	1.9776	-0.130584	0.408216	0.5388	1
4624	orf19.2688	CAL0003534	NAN1	CAL0003534	4	C	18	14	1087	1071	9492	2208	2500	20244	2520	2539	-0.200627	0.1015	0.200627	1.97662	0.0213935	-0.179188	-0.200581	1
6059	orf19.2031	CAL0004377	VPS24	CAL0004377	2	C	-1	2	20	33	555	170	152	3007	624	625	0.886401	0.448534	0.886401	1.97622	-0.722466	0.161463	0.883929	1
801	orf19.2546	CAL0002466	TRP2	CAL0002466	R	C	-1	7	846	847	9377	1017	1226	20535	1563	1564	-0.269916	0.136632	0.269916	1.9755	-0.00170431	-0.269639	-0.267935	1
329	orf19.4754	CAL0004479	KEX2	CAL0004479	1	C	8	7	1341	1132	20012	2647	1866	38405	1524	1707	0.254309	0.12882	0.254309	1.97414	0.244435	0.504409	0.259974	1
895	orf19.1162	CAL0002070		CAL0002070	1	W	4	3	348	312	2070	780	489	4712	378	409	0.516869	0.262348	0.516869	1.97017	0.157541	0.67364	0.516098	1
6029	orf19.700	CAL0001698		CAL0001698	R	W	5	3	227	80	2657	89	56	2413	1824	1852	-0.812855	0.412987	0.812855	1.96823	1.50462	0.668379	-0.836242	1
3331	orf19.1913	CAL0002516		CAL0002516	2	W	10	6	147	68	570	94	73	469	627	634	-0.762322	0.388213	0.762322	1.96367	1.11221	0.364764	-0.747445	1
5031	orf19.4890	CAL0005519	TPK1	CAL0005519	1	C	13	9	114	79	3770	418	435	9401	2931	2957	-0.586344	0.299056	0.586344	1.96065	0.529109	-0.0575125	-0.586622	1
4253	orf19.496	CAL0005874		CAL0005874	R	C	3	3	21	32	2419	74	46	1271	2772	2786	1.22362	0.624831	1.22362	1.95832	-0.607683	0.685891	1.29357	1
4782	orf19.3757	CAL0001219		CAL0001219	1	W	2	4	1506	1874	20704	6266	6531	55290	345	606	0.259979	0.132902	0.259979	1.95617	-0.315399	-0.0597591	0.25564	1
2612	orf19.6126	CAL0005983	KSR1	CAL0005983	R	W	7	6	597	641	12601	8400	7759	111515	1326	1510	0.213988	0.109603	0.213988	1.95239	-0.102593	0.114519	0.217112	1
5126	orf19.3957	CAL0003014	SSD1	CAL0003014	5	C	-1	2	82	120	2827	506	509	10679	882	864	0.551593	0.282771	0.551593	1.95067	-0.549339	-0.00852827	0.54081	1
71	orf19.633	CAL0000972		CAL0000972	R	C	3	4	425	548	9958	366	340	7162	912	1099	0.476757	0.244727	0.476757	1.94812	-0.366713	0.106309	0.473022	1
1038	orf19.2472.1	CAL0120626		CAL0120626	1	W	1	2	426	428	4444	669	930	8828	210	331	-0.44065	0.226453	0.44065	1.94588	-0.00675737	-0.475225	-0.468467	1
3336	orf19.1574	CAL0005602		CAL0005602	2	W	7	6	52	59	1128	233	163	2724	1770	1780	0.703866	0.362076	0.703866	1.94397	-0.182203	0.515458	0.697661	1
4535	orf19.1252	CAL0002950	YME1	CAL0002950	4	W	9	9	780	628	10826	1202	1197	17371	2064	2107	-0.315923	0.162712	0.315923	1.94161	0.31271	0.00601374	-0.306696	1
4228	orf19.3593	CAL0006022		CAL0006022	2	W	10	8	1370	1463	11779	2052	2622	24084	1206	1253	-0.256141	0.132235	0.256141	1.93701	-0.0947539	-0.353637	-0.258883	1
5017	orf19.2277	CAL0006348	TPK2	CAL0006348	2	C	2	2	59	82	3107	155	129	6244	1335	1349	0.723048	0.373349	0.723048	1.93665	-0.474909	0.264897	0.739806	1
3165	orf19.1057	CAL0001192		CAL0001192	1	C	1	2	50	21	1032	167	152	2882	570	648	-1.19472	0.617154	1.19472	1.93586	1.25154	0.135777	-1.11576	1
751	orf19.4496	CAL0002043	MED8	CAL0002043	2	C	8	6	410	402	3564	553	421	6484	1053	1095	0.37102	0.191709	0.37102	1.93533	0.0284284	0.393459	0.365031	1
3188	orf19.805	CAL0002610		CAL0002610	2	W	6	5	241	400	2990	821	1105	8779	858	887	0.308214	0.159299	0.308214	1.93481	-0.730967	-0.428592	0.302375	1
5519	orf19.802	CAL0002607		CAL0002607	2	C	14	9	130	183	985	302	591	4333	1416	1495	-0.470288	0.243325	0.470288	1.93276	-0.493332	-0.96861	-0.475278	1
3240	orf19.4033	CAL0004768	PGA4	CAL0004768	5	C	7	4	21	15	803	58	96	1846	2991	3004	-1.21741	0.629989	1.21741	1.93242	0.485427	-0.726982	-1.21241	1
93	orf19.2107	CAL0005270	MUQ1	CAL0005270	2	C	-1	2	152	165	4961	96	72	5220	240	241	0.543688	0.281925	0.543688	1.92848	-0.118395	0.415037	0.533432	1
1726	orf19.1750	CAL0000867	SLR1	CAL0000867	2	W	1	1	80	69	6712	359	201	35367	792	793	0.610131	0.316471	0.610131	1.92792	0.213404	0.836788	0.623385	1
4698	orf19.3378	CAL0004194		CAL0004194	4	C	6	4	34	11	102	14	15	79	552	552	-1.75488	0.911378	1.75488	1.92552	1.62803	-0.0995357	-1.72757	1
1990	orf19.4600	CAL0003579		CAL0003579	4	C	1	1	24	39	1010	82	51	2663	708	721	1.40836	0.731664	1.40836	1.92488	-0.70044	0.685127	1.38557	1
1714	orf19.6455	CAL0002232		CAL0002232	7	C	2	3	103	122	1790	96	183	4672	669	704	-0.693599	0.360624	0.693599	1.92333	-0.244237	-0.930737	-0.686501	1
3971	orf19.3401	CAL0004860	FPG1	CAL0004860	6	W	3	3	70	94	1442	303	259	5203	657	671	0.651091	0.338989	0.651091	1.92068	-0.425306	0.226366	0.651672	1
3049	orf19.1981	CAL0002703	IMP2	CAL0002703	5	W	5	4	108	111	869	220	137	1692	489	504	0.710444	0.370102	0.710444	1.91959	-0.0395284	0.683328	0.722856	1
3115	orf19.3734	CAL0001170		CAL0001170	R	C	9	9	58	29	855	41	7	644	2580	2935	1.64125	0.855856	1.64125	1.91768	1	2.5502	1.5502	1
6169	orf19.297	CAL0004118	DTD2	CAL0004118	3	C	-1	1	95	128	712	1045	927	3701	102	103	0.620549	0.323769	0.620549	1.91664	-0.430144	0.172862	0.603006	1
5460	orf19.2442	CAL0001541		CAL0001541	1	C	3	1	42	41	588	92	40	1413	708	725	1.1657	0.608299	1.1657	1.91633	0.0347654	1.20163	1.16687	1
3271	orf19.6297	CAL0000624	LYS5	CAL0000624	5	W	7	4	158	161	3151	199	298	3612	1470	1470	-0.550348	0.287464	0.550348	1.91449	-0.0271361	-0.582544	-0.555408	1
834	orf19.3077	CAL0001486	VID21	CAL0001486	4	C	22	10	74	110	698	196	197	1598	2061	2070	0.562547	0.294037	0.562547	1.91318	-0.571906	-0.00734198	0.564564	1
1296	orf19.6136	CAL0006009	FRE7	CAL0006009	R	C	1	1	224	199	7392	77	107	16868	930	1009	-0.649338	0.339469	0.649338	1.9128	0.17073	-0.47468	-0.645411	1
1916	orf19.4183	CAL0005852		CAL0005852	4	C	15	8	74	90	878	272	227	4622	2664	2664	0.546856	0.286084	0.546856	1.91152	-0.2824	0.260914	0.543314	1
808	orf19.5174	CAL0002660		CAL0002660	7	C	4	2	100	127	1172	99	78	2690	501	529	0.68838	0.360128	0.68838	1.91149	-0.344828	0.343954	0.688783	1
5513	orf19.3188	CAL0002426	TAC1	CAL0002426	5	C	26	16	170	191	1429	115	191	1820	2946	2950	-0.56413	0.295217	0.56413	1.9109	-0.168038	-0.731939	-0.563901	1
2174	orf19.2761	CAL0004252		CAL0004252	4	C	8	5	236	273	1454	409	358	2097	798	850	0.412446	0.215861	0.412446	1.9107	-0.210114	0.192141	0.402255	1
509	orf19.3893	CAL0002202		CAL0002202	5	W	7	6	336	320	4465	646	771	12617	1521	1645	-0.325514	0.170367	0.325514	1.91066	0.0703893	-0.255197	-0.325586	1
3546	orf19.6643	CAL0004034	SDA1	CAL0004034	R	W	6	5	54	41	565	44	61	569	1026	1036	-0.887451	0.465219	0.887451	1.9076	0.397335	-0.471306	-0.868641	1
381	orf19.5534	CAL0006141	WSC2	CAL0006141	6	C	4	3	71	110	1254	42	34	1335	1053	1085	0.949184	0.49792	0.949184	1.9063	-0.631613	0.304855	0.936467	1
46	orf19.2791	CAL0004301	BBC1	CAL0004301	1	C	29	19	187	185	1877	1185	928	9043	2868	2878	0.333176	0.174802	0.333176	1.90602	0.015513	0.35269	0.337177	1
5819	orf19.6649	CAL0004048	DBP8	CAL0004048	R	W	1	1	39	40	3309	16	38	4514	1662	1753	-1.30215	0.68335	1.30215	1.90554	-0.0365259	-1.24793	-1.2114	1
1243	orf19.2237.1	CAF0007442		CAF0007442	2	W	1	1	32	14	1619	55	53	4788	606	607	-1.16163	0.610265	1.16163	1.90349	1.19265	0.0534393	-1.13921	1
523	orf19.3138	CAL0002295	NOP1	CAL0002295	4	W	1	1	427	473	18594	1162	1655	184033	951	1060	-0.362783	0.190863	0.362783	1.90075	-0.147604	-0.510221	-0.362617	1
4026	orf19.5225.2	CAF0007036	WRS1	CAF0007036	1	C	-1	3	28016	23954	144200	97141	102997	565919	12	13	-0.296744	0.156137	0.296744	1.90054	0.225984	-0.0844501	-0.310434	1
3397	orf19.4768	CAL0004524	IPT1	CAL0004524	1	W	14	0	82	126	870	21	6	143	1596	1770	2.55212	1.34451	2.55212	1.89818	-0.619728	1.80735	2.42708	1
1544	orf19.2983	CAL0006129	CDC73	CAL0006129	1	W	9	6	363	299	4400	787	813	11675	1113	1186	-0.329588	0.17365	0.329588	1.898	0.279824	-0.0468917	-0.326716	1
3796	orf19.3629	CAL0000357	RRP8	CAL0000357	2	W	24	15	355	414	2857	499	451	4890	2175	2207	0.370735	0.195527	0.370735	1.89608	-0.221812	0.145912	0.367724	1
1724	orf19.3035	CAL0001390		CAL0001390	1	W	4	4	46	57	4314	229	183	15441	4233	4247	0.64272	0.339151	0.64272	1.89509	-0.309328	0.323504	0.632832	1
5021	orf19.3038	CAL0001393	TPS2	CAL0001393	1	W	2	4	482	327	11349	323	295	13409	2667	2890	-0.413924	0.218425	0.413924	1.89504	0.559743	0.130819	-0.428923	1
1120	orf19.4353	CAL0001037	MCM2	CAL0001037	R	C	11	8	164	155	1387	111	161	950	1476	1484	-0.634128	0.334742	0.634128	1.89438	0.0814276	-0.536501	-0.617929	1
353	orf19.2885	CAL0005223	PRI2	CAL0005223	4	C	4	3	113	88	3336	47	66	3517	1632	1645	-0.843412	0.445278	0.843412	1.89412	0.360747	-0.489805	-0.850553	1
5896	orf19.2385	CAL0000813	KTI12	CAL0000813	R	C	5	3	306	244	3114	637	643	6334	867	899	-0.350298	0.185026	0.350298	1.89324	0.326651	-0.0135254	-0.340176	1
2095	orf19.590	CAL0000361	RAX1	CAL0000361	R	C	2	3	162	210	2316	137	118	6995	900	932	0.596135	0.315186	0.596135	1.89138	-0.374396	0.215389	0.589785	1
2177	orf19.5796	CAL0001555		CAL0001555	2	W	8	6	70	70	1297	87	48	1337	1575	1575	0.874073	0.462234	0.874073	1.89098	0	0.857981	0.857981	1
4342	orf19.5719	CAL0001385	POX1	CAL0001385	6	C	3	3	40	44	388	84	51	615	402	430	0.865202	0.457847	0.865202	1.88972	-0.137504	0.719892	0.857396	1
2536	orf19.3348	CAL0004144		CAL0004144	1	W	4	3	797	699	8251	1191	1345	11697	531	595	-0.368211	0.195222	0.368211	1.88611	0.189287	-0.175433	-0.36472	1
3515	orf19.2923	CAL0005989		CAL0005989	4	C	4	3	50	24	843	29	36	1153	1428	1456	-1.38278	0.733224	1.38278	1.88589	1.05889	-0.311944	-1.37084	1
5104	orf19.2933	CAL0006014		CAL0006014	1	C	4	3	74	51	1227	116	46	1799	1002	1015	0.783701	0.416504	0.783701	1.88162	0.537028	1.33442	0.797391	1
1244	orf19.787.1	CAL0120975	RIM11	CAL0120975	4	W	1	3	479	1113	4967	771	2312	15765	216	490	-0.421308	0.223918	0.421308	1.88153	-1.21636	-1.58434	-0.367983	1
4369	orf19.2661	CAF0007105	TLO34	CAF0007105	1	W	1	1	69	34	2701	271	50	5121	996	996	1.29584	0.69007	1.29584	1.87784	1.02106	2.43829	1.41723	1
1117	orf19.2717	CAL0004189	SAS10	CAL0004189	4	C	14	12	592	501	5157	1302	1333	15202	1695	1753	-0.27479	0.14646	0.27479	1.87621	0.240787	-0.0339473	-0.274734	1
5318	orf19.5377	CAL0004384	SCL1	CAL0004384	3	W	5	6	120	124	2206	38	70	1954	1365	1408	-0.832903	0.444092	0.832903	1.87552	-0.0473057	-0.881356	-0.83405	1
5243	orf19.4016	CAL0004684		CAL0004684	5	C	2	1	590	444	33363	728	727	163573	1320	1432	-0.386939	0.206719	0.386939	1.87181	0.410155	0.00198309	-0.408172	1
4760	orf19.4982	CAL0000008		CAL0000008	1	C	13	8	107	76	1238	70	80	860	1629	1641	-0.699686	0.373945	0.699686	1.87109	0.493539	-0.192645	-0.686185	1
1747	orf19.6893	CAL0005917		CAL0005917	2	C	9	8	394	342	3607	396	469	4851	1362	1415	-0.45291	0.242213	0.45291	1.86988	0.204199	-0.244087	-0.448287	1
3939	orf19.2036	CAL0004389		CAL0004389	2	W	2	3	107	110	2542	183	273	4170	1080	1122	-0.526249	0.281806	0.526249	1.86742	-0.0398927	-0.577057	-0.537165	1
2748	orf19.985	CAL0003812		CAL0003812	1	W	13	8	257	182	3418	153	153	2649	2514	2527	-0.498156	0.266787	0.498156	1.86724	0.49783	0	-0.49783	1
2599	orf19.3467	CAL0005039	ALG11	CAL0005039	6	C	9	10	1014	802	20213	1036	1045	35715	2820	3046	-0.357251	0.191762	0.357251	1.86299	0.338384	-0.0124789	-0.350862	1
3576	orf19.2268	CAL0006324	RCK2	CAL0006324	2	C	8	6	437	451	8505	671	548	11645	1719	1863	0.338377	0.181662	0.338377	1.86267	-0.0454942	0.292137	0.337631	1
5340	orf19.4283	CAL0000353	BUR2	CAL0000353	5	C	3	2	470	567	22291	515	476	55126	1008	1263	0.393135	0.211102	0.393135	1.8623	-0.270688	0.113611	0.384299	1
4295	orf19.3367	CAL0004177		CAL0004177	4	W	13	7	1962	2290	10347	2758	2835	17479	876	972	0.182982	0.098269	0.182982	1.86205	-0.223023	-0.0397263	0.183296	1
600	orf19.5089	CAL0001791		CAL0001791	1	C	12	6	59	50	831	15	31	295	2604	2604	-1.33115	0.715142	1.33115	1.86137	0.238787	-1.04731	-1.28609	1
2032	orf19.3781	CAL0001295		CAL0001295	4	C	8	6	36	20	428	15	25	308	1401	1413	-1.56678	0.842928	1.56678	1.85874	0.847997	-0.736966	-1.58496	1
1710	orf19.132	CAL0003071		CAL0003071	6	C	3	2	57	177	4512	50	81	3781	1782	1812	0.935961	0.504343	0.935961	1.8558	-1.63472	-0.695994	0.938722	1
5596	orf19.3431	CAL0004952		CAL0004952	6	C	-1	7	71	54	1872	17	29	1718	2031	3731	-1.19068	0.642043	1.19068	1.85452	0.39486	-0.770518	-1.16538	1
2842	orf19.4740	CAL0004445		CAL0004445	1	C	3	2	24	47	551	20	13	480	633	645	1.59956	0.862545	1.59956	1.85446	-0.969626	0.621488	1.59111	1
1965	orf19.3026	CAL0001369	MAS1	CAL0001369	1	C	3	3	128	154	6462	188	155	11631	1404	1434	0.558185	0.30143	0.558185	1.85179	-0.266787	0.278464	0.545251	1
3068	orf19.1598	CAL0005685	ERG24	CAL0005685	2	C	2	2	113	121	6222	163	298	6931	1347	1416	-0.711755	0.384529	0.711755	1.85098	-0.0986843	-0.87044	-0.771756	1
3881	orf19.4895	CAL0005524	RPA34	CAL0005524	1	C	3	3	56	47	949	72	94	2625	822	843	-0.634054	0.343431	0.634054	1.84623	0.252766	-0.384664	-0.63743	1
6097	orf19.2663	CAL0003492		CAL0003492	1	W	6	9	137	174	2299	102	81	1752	1755	2344	0.693214	0.376049	0.693214	1.84341	-0.344911	0.332575	0.677487	1
5686	orf19.2842	CAL0005136	GZF3	CAL0005136	R	C	19	13	289	364	3379	930	931	10968	2139	2193	0.329188	0.178711	0.329188	1.84201	-0.332869	-0.00155045	0.331319	1
995	orf19.4631	CAL0003665	RPL20B	CAL0003665	4	C	3	3	1390	1585	27454	964	870	24608	966	1041	0.333387	0.181189	0.333387	1.84	-0.189398	0.148018	0.337416	1
3844	orf19.2961	CAL0006077		CAL0006077	1	W	1	1	33	25	1719	67	29	5092	1194	1209	0.829478	0.451143	0.829478	1.83861	0.400538	1.20811	0.80757	1
2183	orf19.4585	CAL0002912	HGH1	CAL0002912	4	C	7	7	207	270	4648	521	524	10948	1827	1854	0.373927	0.203507	0.373927	1.83742	-0.383329	-0.00828344	0.375045	1
790	orf19.6686	CAL0004137	ARG4	CAL0004137	7	C	9	6	178	210	5474	840	770	11868	2253	2332	0.362817	0.197624	0.362817	1.8359	-0.238512	0.125531	0.364043	1
3754	orf19.5300	CAL0004243	PGA31	CAL0004243	4	C	9	9	503	377	3885	151	164	2204	1746	1831	-0.535666	0.291929	0.535666	1.83492	0.415994	-0.119147	-0.535141	1
4117	orf19.3012	CAL0001342	ARO80	CAL0001342	1	C	10	9	26	39	1232	111	97	1938	3198	3208	0.813845	0.443852	0.813845	1.8336	-0.584963	0.194503	0.779466	1
4795	orf19.91	CAL0000703		CAL0000703	6	C	5	2	68	63	675	49	77	1005	900	923	-0.772998	0.421654	0.772998	1.83325	0.110183	-0.652077	-0.76226	1
5255	orf19.1628	CAL0006379	LAP41	CAL0006379	3	C	9	8	1065	983	9269	838	936	17146	1554	1656	-0.277888	0.1517	0.277888	1.83183	0.11559	-0.159558	-0.275148	1
2277	orf19.2671	CAL0003510		CAL0003510	4	W	10	10	57	100	522	110	102	971	1344	1358	0.876238	0.478431	0.876238	1.83148	-0.810966	0.108934	0.919901	1
4033	orf19.3854	CAL0002089	CDC28	CAL0002089	R	W	4	4	68	87	2574	222	198	6167	1893	1931	0.514122	0.280881	0.514122	1.83039	-0.355481	0.165059	0.52054	1
1565	orf19.5493	CAL0005360	EFH1	CAL0005360	2	C	1	1	832	768	57780	1841	1248	175987	645	808	0.43602	0.238614	0.43602	1.8273	0.115477	0.560872	0.445394	1
4348	orf19.4301	CAL0000885	GAP1	CAL0000885	5	W	23	13	312	256	2067	577	605	5516	2445	2510	-0.351345	0.192517	0.351345	1.82501	0.285402	-0.0683638	-0.353766	1
5935	orf19.2970	CAL0006102	LYS2	CAL0006102	1	W	31	22	701	591	5947	1560	1535	22468	4215	4230	-0.222905	0.122208	0.222905	1.82398	0.246256	0.0233074	-0.222949	1
2733	orf19.2928	CAL0005997		CAL0005997	1	C	4	5	166	198	4311	191	140	2902	1074	1218	0.687202	0.37705	0.687202	1.82258	-0.254317	0.448146	0.702463	1
3669	orf19.4731	CAL0004421	SEC24	CAL0004421	1	W	6	5	58	130	1278	81	101	2188	1176	1190	0.83714	0.459455	0.83714	1.82203	-1.16439	-0.318361	0.846025	1
2021	orf19.3616	CAL0000316	GTR1	CAL0000316	2	W	4	5	487	475	11079	591	726	15104	1347	1547	-0.334755	0.183996	0.334755	1.81936	0.0359943	-0.296811	-0.332806	1
6135	orf19.4699	CAL0003862		CAL0003862	4	C	8	7	25	61	861	23	26	347	2058	2058	1.12741	0.621161	1.12741	1.81501	-1.28688	-0.176878	1.11	1
5837	orf19.920	CAL0003625	THR1	CAL0003625	5	W	3	2	165	104	4149	121	44	6593	1356	1370	0.817419	0.450473	0.817419	1.81458	0.665882	1.45943	0.793549	1
3288	orf19.2158	CAL0006619	NAG3	CAL0006619	6	C	22	9	367	439	2785	1554	2363	17456	1686	1721	-0.338535	0.18671	0.338535	1.81316	-0.258441	-0.604633	-0.346192	1
3124	orf19.689	CAL0001144		CAL0001144	6	W	4	4	40	66	1533	15	10	596	1818	1818	1.3442	0.742308	1.3442	1.81084	-0.722466	0.584963	1.30743	1
1280	orf19.3091	CAL0001522		CAL0001522	4	W	19	9	157	180	3637	353	303	5339	4305	4315	0.417175	0.230613	0.417175	1.80898	-0.197232	0.22035	0.417583	1
1957	orf19.3773	CAL0001270	PPG1	CAL0001270	4	W	24	14	145	186	1376	413	386	2730	2022	2040	0.453816	0.250905	0.453816	1.80872	-0.35925	0.0975409	0.456791	1
2688	orf19.3295	CAL0003444		CAL0003444	1	C	10	5	95	88	840	120	170	1689	1425	1465	-0.627454	0.347097	0.627454	1.80772	0.110424	-0.5025	-0.612924	1
488	orf19.4150	CAL0005739	SPO1	CAL0005739	5	C	1	1	111	140	2820	8	36	2392	690	730	-1.82103	1.00746	1.82103	1.80754	-0.334867	-2.16993	-1.83506	1
1784	orf19.5042	CAL0001667		CAL0001667	4	C	6	4	23	14	136	46	62	469	639	639	-1.19447	0.660881	1.19447	1.80739	0.716207	-0.430634	-1.14684	1
5274	orf19.173	CAL0003208		CAL0003208	R	W	24	15	112	92	1299	375	423	4470	3303	3316	-0.459164	0.25406	0.459164	1.80731	0.283793	-0.173767	-0.45756	1
2247	orf19.6214	CAL0000443		CAL0000443	1	C	5	4	71	26	2857	91	15	1982	3237	3251	1.12933	0.625334	1.12933	1.80596	1.44931	2.6009	1.1516	1
234	orf19.2107.1	CAF0006934	STF2	CAF0006934	2	W	0	1	664	482	13078	54	25	15699	270	344	0.641048	0.355003	0.641048	1.80575	0.46215	1.11103	0.648881	1
5418	orf19.5818	CAL0002282	SGT2	CAL0002282	2	W	3	4	457	384	6320	226	123	5604	1029	1218	0.654179	0.362775	0.654179	1.80326	0.251088	0.877664	0.626577	1
5480	orf19.5066	CAL0001723		CAL0001723	1	C	9	6	459	355	2402	1198	1255	7168	801	835	-0.432207	0.239928	0.432207	1.8014	0.370675	-0.0670595	-0.437735	1
3725	orf19.2695	CAL0003550	UBR1	CAL0003550	4	C	14	14	239	232	4832	214	280	8711	5364	5373	-0.428546	0.23793	0.428546	1.80114	0.0428858	-0.387816	-0.430702	1
1380	orf19.808	CAL0002613		CAL0002613	2	W	13	10	170	180	1883	593	477	5677	1833	1846	0.397859	0.221077	0.397859	1.79964	-0.0824622	0.314043	0.396505	1
4745	orf19.2095	CAL0004568		CAL0004568	2	C	5	4	240	270	7537	1357	1222	33500	2100	2129	0.323094	0.179656	0.323094	1.7984	-0.169925	0.151176	0.321101	1
3646	orf19.2881	CAL0005219	MNN4	CAL0005219	4	W	17	15	393	409	5331	346	457	5650	2994	3057	-0.343865	0.191435	0.343865	1.79625	-0.0575715	-0.401422	-0.343851	1
1502	orf19.6355	CAL0001341		CAL0001341	1	W	10	8	879	979	11139	1811	1709	27660	1554	1589	0.234416	0.130504	0.234416	1.79624	-0.155446	0.0836341	0.23908	1
5281	orf19.2043	CAL0004410		CAL0004410	2	C	1	1	6	21	1397	33	50	1980	903	913	1.41441	0.788284	1.41441	1.79429	-1.80735	-0.599462	1.20789	1
1668	orf19.3688	CAL0000471		CAL0000471	1	C	2	2	106	103	858	375	250	2767	366	389	0.552704	0.308073	0.552704	1.79407	0.0414199	0.584963	0.543543	1
3201	orf19.2415	CAL0001478		CAL0001478	R	W	12	7	339	277	2345	283	341	2348	1530	1551	-0.539582	0.301011	0.539582	1.79257	0.291399	-0.26897	-0.560369	1
4505	orf19.921	CAL0003626	SAM51	CAL0003626	5	C	17	11	198	139	1930	409	376	4123	2058	2070	-0.396151	0.221228	0.396151	1.79069	0.510416	0.121368	-0.389047	1
5466	orf19.3152	CAL0002338	AMO2	CAL0002338	2	W	3	3	32	25	1681	65	97	2992	2016	2031	-0.953996	0.533299	0.953996	1.78886	0.356144	-0.577545	-0.933689	1
5211	orf19.1630	CAL0006396		CAL0006396	3	C	-1	4	71	51	2514	205	227	12874	108	109	-0.638836	0.357139	0.638836	1.78876	0.477322	-0.147068	-0.62439	1
3334	orf19.1111	CAL0001873		CAL0001873	5	C	7	5	176	166	1446	395	533	3946	699	739	-0.514162	0.287895	0.514162	1.78594	0.0843922	-0.432283	-0.516675	1
139	orf19.2834	CAL0005111	RPD3	CAL0005111	R	C	12	6	239	198	2302	132	170	2046	1443	1467	-0.646996	0.362545	0.646996	1.7846	0.27151	-0.364997	-0.636507	1
2652	orf19.3470	CAL0005055		CAL0005055	6	C	13	9	268	375	4968	184	186	3582	2382	2402	0.473136	0.265167	0.473136	1.78429	-0.484658	-0.0155969	0.469061	1
5692	orf19.3724	CAL0001138		CAL0001138	R	W	5	5	178	148	1900	691	421	7570	810	841	0.460282	0.258004	0.460282	1.78401	0.26628	0.714865	0.448585	1
370	orf19.6477	CAL0002289		CAL0002289	7	C	9	6	372	548	4434	1000	1050	11739	1281	1297	0.464354	0.260337	0.464354	1.78367	-0.558873	-0.0703893	0.488484	1
2940	orf19.4078	CAL0004911	SLP2	CAL0004911	2	W	4	4	168	167	2916	230	171	4654	1014	1041	0.425971	0.238845	0.425971	1.78346	0.00861313	0.427638	0.419024	1
3661	orf19.5105	CAL0002490	DIP2	CAL0002490	1	C	8	6	95	113	2727	233	191	8014	3441	3455	0.549825	0.30836	0.549825	1.78306	-0.250323	0.286757	0.537081	1
2547	orf19.2329.1	CAF0006947	RPS17B	CAF0006947	1	W	1	1	5323	5133	117698	17552	19016	722328	414	415	-0.170684	0.095778	0.170684	1.78208	0.0524373	-0.115578	-0.168016	1
5364	orf19.5650	CAL0000661	STE24	CAL0000661	4	C	7	5	503	535	4923	2619	2368	27145	825	826	0.237017	0.133241	0.237017	1.77886	-0.0889805	0.145347	0.234327	1
5159	orf19.850	CAL0002774	SAP99	CAL0002774	2	W	8	6	53	61	705	66	120	1666	1125	1140	-0.672292	0.378212	0.672292	1.77755	-0.202817	-0.862496	-0.65968	1
3372	orf19.2828	CAL0005089		CAL0005089	R	W	2	2	30	42	1828	118	87	5133	849	862	0.944493	0.533172	0.944493	1.77146	-0.485427	0.4397	0.925126	1
2054	orf19.6033	CAL0005100	RIC1	CAL0005100	1	C	2	2	84	104	3104	62	44	7760	1830	1929	0.804224	0.454117	0.804224	1.77096	-0.308122	0.494765	0.802887	1
3440	orf19.5674	CAL0000715	DUR4	CAL0000715	4	C	9	5	110	85	715	107	50	459	753	753	0.718997	0.406382	0.718997	1.76926	0.371969	1.09761	0.725642	1
5055	orf19.5517	CAL0006095		CAL0006095	6	W	11	5	638	546	6979	1602	1112	17344	1110	1142	0.298204	0.168599	0.298204	1.76872	0.224655	0.526717	0.302062	1
1321	orf19.5175	CAL0002662		CAL0002662	7	C	9	9	351	321	7665	208	140	7305	3420	3429	0.441971	0.249886	0.441971	1.76869	0.128898	0.571157	0.442259	1
1025	orf19.4407	CAL0001719		CAL0001719	4	W	17	14	165	152	1815	68	39	660	2079	2130	0.698375	0.394916	0.698375	1.76841	0.118395	0.802061	0.683666	1
4730	orf19.1033	CAL0001118	STR2	CAL0001118	1	C	6	5	279	251	6168	192	238	5213	1788	1813	-0.462421	0.261657	0.462421	1.76728	0.152578	-0.309855	-0.462433	1
5976	orf19.4670	CAL0003780		CAL0003780	4	W	3	3	54	80	3270	77	69	5477	2466	2480	0.727482	0.412389	0.727482	1.76407	-0.567041	0.158262	0.725303	1
6094	orf19.4135	CAL0005673	YBL053	CAL0005673	5	W	10	7	9	25	260	26	26	380	1497	1497	1.53819	0.872125	1.53819	1.76373	-1.47393	0	1.47393	1
1826	orf19.2984	CAL0006130	MST1	CAL0006130	1	C	8	3	114	119	2436	100	166	2810	1368	1396	-0.683667	0.387958	0.683667	1.76222	-0.0619277	-0.731183	-0.669255	1
1444	orf19.4190	CAL0005879	RLP24	CAL0005879	4	W	1	2	183	169	4276	57	95	15778	474	527	-0.88112	0.500439	0.88112	1.76069	0.11482	-0.736966	-0.851786	1
3403	orf19.4628	CAL0003648		CAL0003648	4	C	1	2	55	41	1529	60	77	6550	1497	1512	-0.781162	0.443888	0.781162	1.75982	0.423808	-0.359896	-0.783704	1
1285	orf19.2306	CAL0000649		CAL0000649	1	W	2	2	150	143	2955	244	301	6377	537	571	-0.370052	0.21028	0.370052	1.75981	0.0689474	-0.302882	-0.37183	1
2319	orf19.3195	CAL0002448	HIP1	CAL0002448	5	C	7	7	279	186	3047	218	206	5651	1800	1846	-0.489774	0.27842	0.489774	1.75912	0.584963	0.0816838	-0.503279	1
2696	orf19.5843	CAL0002350		CAL0002350	R	C	2	3	22	31	330	25	73	1139	849	876	-1.05677	0.601258	1.05677	1.7576	-0.494765	-1.54597	-1.0512	1
15	orf19.6948	CAL0000278		CAL0000278	3	W	2	4	390	329	18133	472	297	26760	939	1545	0.442249	0.251662	0.442249	1.75731	0.245387	0.668324	0.422937	1
1404	orf19.3732	CAL0001165	IDP2	CAL0001165	R	W	3	6	595	622	9064	272	216	11090	927	1158	0.39509	0.224992	0.39509	1.75602	-0.0640249	0.332575	0.3966	1
4826	orf19.6869	CAL0005847		CAL0005847	2	C	8	6	91	109	802	289	250	2819	1050	1061	0.470196	0.267833	0.470196	1.75556	-0.26039	0.209141	0.469531	1
2009	orf19.4862.2	CAF0007024	PDC2	CAF0007024	1	W	2	3	143	147	1374	473	345	3535	324	325	0.472735	0.269653	0.472735	1.75312	-0.039801	0.455244	0.495045	1
629	orf19.1622	CAL0006366	YCG1	CAL0006366	3	C	15	13	248	187	3063	121	133	3199	3780	3789	-0.55245	0.315157	0.55245	1.75294	0.407302	-0.136419	-0.543721	1
4379	orf19.131	CAL0003069		CAL0003069	6	W	4	3	24	20	220	26	50	516	675	690	-1.23974	0.707323	1.23974	1.75273	0.263034	-0.943416	-1.20645	1
5241	orf19.5050	CAL0001681		CAL0001681	1	W	1	1	32	29	1902	19	6	2881	2088	2165	1.46159	0.834627	1.46159	1.75119	0.142019	1.66297	1.52095	1
3609	orf19.1555	CAL0005530	SAC3	CAL0005530	2	C	50	23	395	388	3033	518	629	4172	3672	3685	-0.307515	0.175735	0.307515	1.74988	0.025796	-0.280108	-0.305904	1
2510	orf19.4534	CAL0002723	PTR3	CAL0002723	1	C	11	7	176	186	1739	337	265	3987	1530	1553	0.424724	0.243059	0.424724	1.74741	-0.0797272	0.346756	0.426483	1
3129	orf19.3053	CAL0001432		CAL0001432	1	C	6	3	1731	1605	13370	3378	2708	35705	546	681	0.207049	0.118498	0.207049	1.74728	0.109032	0.318942	0.209909	1
3643	orf19.18	CAL0000509	IMH3	CAL0000509	2	C	-1	7	3179	4434	51072	5428	6021	93542	27	28	0.314443	0.180096	0.314443	1.74597	-0.480036	-0.149582	0.330453	1
5597	orf19.5633	CAL0000613	RBT5	CAL0000613	4	C	5	3	27	11	468	34	36	494	1401	1409	-1.44913	0.830085	1.44913	1.74576	1.29546	-0.0824622	-1.37792	1
3107	orf19.4268	CAL0000293		CAL0000293	5	C	9	6	532	636	11813	473	700	16806	2400	2445	-0.306872	0.176133	0.306872	1.74227	-0.257601	-0.565515	-0.307914	1
3260	orf19.3482	CAL0005086		CAL0005086	6	W	3	4	205	133	4320	334	158	5959	1392	1407	0.452087	0.259529	0.452087	1.74195	0.624198	1.07992	0.455726	1
4271	orf19.2267	CAL0006323	RFA2	CAL0006323	2	W	2	2	263	234	6231	826	1002	16744	819	834	-0.446426	0.256416	0.446426	1.74102	0.168554	-0.278669	-0.447223	1
3174	orf19.2088	CAL0004533		CAL0004533	2	C	6	3	189	173	2191	186	243	5210	786	796	-0.506694	0.291173	0.506694	1.74018	0.127614	-0.385654	-0.513268	1
1257	orf19.2751	CAL0004235		CAL0004235	4	W	7	7	129	63	1515	75	61	786	1548	1558	-0.731529	0.420848	0.731529	1.73823	1.03395	0.298081	-0.735866	1
4542	orf19.4510	CAL0002648		CAL0002648	2	W	15	8	22	44	316	16	10	169	2034	2034	1.73648	0.999944	1.73648	1.73658	-1	0.678072	1.67807	1
4239	orf19.273	CAL0004059		CAL0004059	3	C	5	4	405	303	3222	370	376	6792	1008	1025	-0.429671	0.24754	0.429671	1.73576	0.418604	-0.0232074	-0.441812	1
932	orf19.4951	CAL0006327		CAL0006327	1	W	12	11	88	98	630	79	54	358	1269	1283	0.713804	0.411298	0.713804	1.73549	-0.155278	0.548893	0.704171	1
2527	orf19.1232	CAL0002875	VRG4	CAL0002875	1	C	2	4	665	1098	20131	355	440	30990	1116	1327	0.42466	0.244831	0.42466	1.7345	-0.723452	-0.309684	0.413767	1
3816	orf19.2895	CAL0005252	VMA8	CAL0005252	4	C	5	3	474	525	6275	1113	1472	12483	804	827	-0.252775	0.145893	0.252775	1.73261	-0.14743	-0.403324	-0.255894	1
4546	orf19.2018	CAL0004339		CAL0004339	2	C	3	3	66	71	736	94	156	1410	450	463	-0.61802	0.356805	0.61802	1.73209	-0.105353	-0.730813	-0.62546	1
786	orf19.1026	CAL0001085		CAL0001085	1	C	12	10	739	663	4028	1401	1491	8550	993	1057	-0.245919	0.141992	0.245919	1.73192	0.156565	-0.0898233	-0.246389	1
3570	orf19.2682	CAL0003530		CAL0003530	4	W	9	5	888	750	5240	1181	1167	8815	828	876	-0.224708	0.129762	0.224708	1.73169	0.243669	0.0172044	-0.226465	1
2783	orf19.4149.1	CAF0007002		CAF0007002	5	W	2	2	7265	5237	82149	40260	32238	466464	468	469	-0.154203	0.089088	0.154203	1.73091	0.472222	0.320585	-0.151637	1
1441	orf19.323	CAL0004701		CAL0004701	3	W	18	14	180	147	2525	150	169	4660	4440	4459	-0.465869	0.269269	0.465869	1.73012	0.292181	-0.172061	-0.464241	1
3972	orf19.2440	CAL0001537		CAL0001537	1	W	14	10	71	78	1524	107	73	1246	2550	2567	0.684994	0.395975	0.684994	1.72989	-0.135655	0.551642	0.687298	1
3654	orf19.1303	CAL0003702		CAL0003702	4	C	14	7	215	379	1967	208	273	1521	1185	1198	0.433387	0.250595	0.433387	1.72943	-0.817861	-0.392317	0.425544	1
1409	orf19.3653	CAL0000418		CAL0000418	6	W	6	6	204	174	3542	168	101	4211	1953	1967	0.504359	0.291963	0.504359	1.72748	0.229482	0.734106	0.504624	1
3781	orf19.4798	CAL0004618	CEF1	CAL0004618	1	C	18	14	417	459	4459	502	435	6117	2877	2889	0.345119	0.200042	0.345119	1.72523	-0.138447	0.206672	0.345119	1
4952	orf19.5168	CAL0002631		CAL0002631	7	C	1	1	24	64	3953	22	173	14824	1305	1316	-1.91132	1.10946	1.91132	1.72275	-1.41504	-2.9752	-1.56016	1
5465	orf19.829	CAL0002687		CAL0002687	2	C	9	7	185	213	2889	338	285	12483	2364	2406	0.448577	0.260466	0.448577	1.72221	-0.203328	0.246061	0.449389	1
6136	orf19.2709	CAL0004174	ZUO1	CAL0004174	4	C	3	3	585	479	22606	1813	1842	143633	1284	1364	-0.320658	0.186194	0.320658	1.72217	0.288411	-0.0228941	-0.311305	1
5512	orf19.5188	CAL0002701		CAL0002701	7	W	5	5	192	204	4494	113	81	11339	3081	3131	0.57418	0.333726	0.57418	1.72051	-0.0874628	0.480329	0.567792	1
5417	orf19.2131	CAL0005319		CAL0005319	6	C	1	1	13	6	1841	13	20	1534	2331	2350	-1.84509	1.07372	1.84509	1.71841	1.11548	-0.621488	-1.73697	1
4184	orf19.2621	CAL0003402		CAL0003402	R	W	1	1	34	45	1104	74	148	3515	378	379	-0.596257	0.347064	0.596257	1.718	-0.40439	-1	-0.59561	1
4769	orf19.1814	CAL0001601	STT4	CAL0001601	R	W	46	29	764	582	7153	674	621	6146	5784	5800	-0.276902	0.161257	0.276902	1.71715	0.392553	0.118155	-0.274398	1
1728	orf19.3667	CAL0000438	HGT2	CAL0000438	1	W	13	10	59	73	495	50	101	870	1617	1629	-0.715121	0.416533	0.715121	1.71684	-0.307182	-1.01436	-0.707174	1
2586	orf19.5814	CAL0002275		CAL0002275	2	W	3	3	91	74	553	35	58	380	351	364	-1.00843	0.588972	1.00843	1.71218	0.298341	-0.728698	-1.02704	1
1532	orf19.1949	CAL0002589	VPS1	CAL0002589	5	W	17	9	657	587	8231	2869	2925	37365	2082	2151	-0.192802	0.112612	0.192802	1.71209	0.162533	-0.0278887	-0.190422	1
1050	orf19.3622	CAL0000337	SMC2	CAL0000337	2	W	2	2	23	54	2492	70	409	4433	1287	1375	-1.36915	0.800689	1.36915	1.70996	-1.23133	-2.54667	-1.31535	1
2722	orf19.729	CAL0001780		CAL0001780	R	W	2	1	46	30	1452	29	53	2103	828	842	-1.63855	0.958728	1.63855	1.70908	0.616671	-0.869939	-1.48661	1
1776	orf19.1490	CAL0004775	MSB2	CAL0004775	2	W	2	2	42	30	4546	45	55	18584	4230	4258	-0.795167	0.46591	0.795167	1.7067	0.485427	-0.289507	-0.774933	1
5966	orf19.5376	CAL0004382	HOS2	CAL0004382	3	W	16	10	69	64	752	34	59	422	2436	2436	-0.878712	0.514901	0.878712	1.70656	0.108524	-0.79518	-0.903705	1
2205	orf19.4304	CAL0000889		CAL0000889	5	C	4	4	277	354	10881	448	444	13134	1749	1806	0.370037	0.21689	0.370037	1.7061	-0.353863	0.0129391	0.366802	1
5347	orf19.4176	CAL0005820	HIS5	CAL0005820	4	W	1	1	165	125	6055	460	251	20829	741	777	0.442532	0.259703	0.442532	1.70399	0.400538	0.873946	0.473409	1
140	orf19.5110	CAL0002507	TKL1	CAL0002507	1	W	8	6	49	68	946	40	27	1235	1584	1598	1.03879	0.609862	1.03879	1.70332	-0.472753	0.567041	1.03979	1
6095	orf19.1267	CAL0002990		CAL0002990	4	W	8	6	420	407	5304	976	784	12944	1386	1423	0.271252	0.159741	0.271252	1.69807	0.0453605	0.316027	0.270667	1
5081	orf19.3915	CAL0002864		CAL0002864	5	C	2	3	784	838	25290	6465	5926	81602	1305	1480	0.233658	0.137655	0.233658	1.69742	-0.0960966	0.125592	0.221688	1
2851	orf19.53	CAL0000603		CAL0000603	1	C	12	5	187	209	1478	369	308	2146	1134	1143	0.421697	0.24915	0.421697	1.69254	-0.160465	0.26069	0.421155	1
2934	orf19.1991	CAL0002738		CAL0002738	2	W	7	8	478	527	9059	385	328	7216	1734	1881	0.382031	0.226092	0.382031	1.68971	-0.140792	0.231163	0.371955	1
1745	orf19.1364	CAL0003884		CAL0003884	2	W	4	3	135	81	1851	260	214	2780	1038	1052	-0.461387	0.273091	0.461387	1.6895	0.736966	0.280901	-0.456065	1
4070	orf19.1643	CAL0000015		CAL0000015	3	W	1	1	64	51	3517	26	35	4714	984	998	-0.782919	0.463533	0.782919	1.68903	0.327575	-0.428843	-0.756418	1
5067	orf19.1738.1	CAF0006929		CAF0006929	R	W	1	1	329	241	6703	571	536	13943	288	332	-0.365621	0.216568	0.365621	1.68825	0.449054	0.0912577	-0.357797	1
4139	orf19.913.2	CAF0006914	CDR11	CAF0006914	3	W	2	1	966	1036	14830	2069	1393	54177	408	409	0.659796	0.39116	0.659796	1.68677	-0.100929	0.570738	0.671667	1
4969	orf19.3685	CAL0000468		CAL0000468	1	C	12	11	102	112	1720	96	65	1083	2943	2980	0.71064	0.421303	0.71064	1.68677	-0.13493	0.562595	0.697524	1
2303	orf19.478	CAL0005807		CAL0005807	R	C	2	2	15	20	765	16	5	804	1698	1703	1.92578	1.14216	1.92578	1.68608	-0.415037	1.67807	2.09311	1
4835	orf19.59	CAL0000609	RAS2	CAL0000609	1	W	26	11	893	1010	4589	3454	3365	19298	1149	1235	0.216616	0.128504	0.216616	1.68568	-0.177623	0.0376616	0.215285	1
2073	orf19.1251	CAL0002947	BRN1	CAL0002947	4	C	17	12	159	185	1944	348	310	2668	2238	2254	0.386046	0.229128	0.386046	1.68485	-0.218499	0.166819	0.385318	1
5590	orf19.6358	CAL0001347	SPA2	CAL0001347	1	C	-1	1	80	88	2276	159	112	5608	42	43	0.639076	0.37952	0.639076	1.68391	-0.137504	0.505528	0.643032	1
499	orf19.3342	CAL0004136	VPS17	CAL0004136	1	W	12	9	199	145	2079	174	178	2499	1851	1864	-0.484836	0.288059	0.484836	1.68311	0.456716	-0.0327899	-0.489505	1
5231	orf19.4309	CAL0000895	ZCF2	CAL0000895	5	C	5	4	923	637	14113	1579	1450	32726	1026	1113	-0.405318	0.24105	0.405318	1.68147	0.535037	0.122958	-0.412079	1
6144	orf19.5673	CAL0000713		CAL0000713	4	C	8	7	69	81	1387	15	37	767	2244	2244	-1.10267	0.655846	1.10267	1.68129	-0.231326	-1.30256	-1.07124	1
4554	orf19.5812	CAL0002272	SCT2	CAL0002272	2	C	5	5	767	662	13536	1026	1085	19687	1266	1386	-0.294428	0.175173	0.294428	1.68078	0.212395	-0.0806643	-0.29306	1
414	orf19.1144	CAL0002006		CAL0002006	1	W	20	18	233	271	3823	641	602	7616	3366	3487	0.310245	0.184817	0.310245	1.67866	-0.217963	0.0905609	0.308524	1
181	orf19.2903	CAL0005941	AGO1	CAL0005941	4	W	6	6	146	140	3060	121	168	6651	2754	2912	-0.532375	0.317625	0.532375	1.67611	0.0605415	-0.473454	-0.533996	1
13	orf19.6393	CAL0001427	ATS1	CAL0001427	R	W	3	3	66	47	1380	283	289	6998	1254	1265	-0.524493	0.313079	0.524493	1.67527	0.489805	-0.0302674	-0.520073	1
2209	orf19.1313	CAL0003726	CDR3	CAL0003726	4	C	12	5	41	54	594	6	23	137	1221	1221	-1.64824	0.985117	1.64824	1.67315	-0.397335	-1.9386	-1.54126	1
648	orf19.6229	CAL0000462	NPR1	CAL0000462	1	W	5	4	195	197	4611	999	1274	33465	1458	1473	-0.344752	0.206255	0.344752	1.67148	-0.0147215	-0.350809	-0.336087	1
4534	orf19.5658	CAL0000673	PTC7	CAL0000673	4	C	1	1	67	72	5128	54	28	6753	1008	1041	1.05186	0.629359	1.05186	1.67132	-0.103836	0.947533	1.05137	1
556	orf19.6293	CAL0000619	VPS22	CAL0000619	R	W	5	6	2052	1517	12515	2759	2355	13139	603	781	-0.206886	0.12382	0.206886	1.67086	0.43581	0.228418	-0.207391	1
6085	orf19.796	CAL0002027	STE4	CAL0002027	2	C	5	4	85	94	1049	113	79	2390	1014	1023	0.664532	0.397917	0.664532	1.67003	-0.145198	0.516398	0.661596	1
2621	orf19.3110	CAL0002229		CAL0002229	4	W	21	5	102	94	916	26	10	208	2079	2258	1.34301	0.804615	1.34301	1.66913	0.117836	1.37851	1.26068	1
1378	orf19.2496	CAL0001662	ATO2	CAL0001662	3	W	3	2	125	93	1330	317	163	6300	798	813	0.533571	0.319675	0.533571	1.6691	0.426625	0.959611	0.532985	1
1148	orf19.3037	CAL0001392		CAL0001392	1	W	3	3	1131	1101	68875	9059	7515	400650	1890	2334	0.233458	0.139918	0.233458	1.66853	0.0387845	0.269579	0.230794	1
5922	orf19.4225	CAL0000141		CAL0000141	5	C	33	17	298	339	2167	760	720	4523	2955	2969	0.263129	0.157803	0.263129	1.66745	-0.185973	0.0780025	0.263975	1
5641	orf19.3775	CAL0001272	IMG2	CAL0001272	4	C	19	10	214	186	4501	532	575	6525	4455	4464	-0.315741	0.189392	0.315741	1.66713	0.202308	-0.112136	-0.314444	1
1311	orf19.4932	CAL0006276	FAD3	CAL0006276	1	C	15	9	1140	982	14460	3594	2685	44004	2286	2362	0.21104	0.12672	0.21104	1.6654	0.215239	0.420668	0.205429	1
2132	orf19.3415	CAL0004902	RPL32	CAL0004902	6	C	11	11	177	180	2407	316	238	4427	2439	2448	0.438056	0.263302	0.438056	1.6637	-0.0242475	0.408963	0.433211	1
5873	orf19.2328	CAL0000701		CAL0000701	1	C	9	7	838	903	5847	626	547	4607	837	931	0.301607	0.181359	0.301607	1.66304	-0.107776	0.194622	0.302398	1
3037	orf19.1973	CAL0002670	HAP5	CAL0002670	5	C	6	4	49	84	1017	378	432	4694	1047	1114	0.596551	0.358919	0.596551	1.66208	-0.777608	-0.192645	0.584963	1
6043	orf19.3656	CAL0000422		CAL0000422	6	C	6	4	273	249	6211	330	376	9497	1440	1488	-0.325345	0.195757	0.325345	1.66198	0.132755	-0.188267	-0.321022	1
4052	orf19.4565	CAL0002830		CAL0002830	4	C	6	2	1019	1064	15713	2843	3398	43328	927	1101	-0.195881	0.1179	0.195881	1.66142	-0.0623441	-0.257272	-0.194928	1
3371	orf19.4632	CAL0003667			4	C	0	3	10967	11912	220711	60	95	678663	519	767	-0.543821	0.327494	0.543821	1.66055	-0.119247	-0.662965	-0.543718	1
1925	orf19.576	CAL0000307		CAL0000307	5	W	3	2	96	101	1244	102	64	1501	489	525	0.759828	0.4578	0.759828	1.65974	-0.073249	0.672425	0.745674	1
882	orf19.2818	CAL0005059		CAL0005059	R	C	28	23	165	157	1150	199	252	1822	3213	3213	-0.422339	0.254793	0.422339	1.65758	0.0717015	-0.340655	-0.412357	1
6061	orf19.2097	CAL0004569		CAL0004569	2	W	7	6	32	35	1230	18	39	1207	3255	3268	-1.00124	0.604361	1.00124	1.6567	-0.129283	-1.11548	-0.986194	1
3390	orf19.2325	CAL0000698		CAL0000698	1	W	6	5	39	64	779	65	63	1201	1554	1567	0.784266	0.47355	0.784266	1.65614	-0.714598	0.0450879	0.759686	1
717	orf19.3099	CAL0001533	TRP4	CAL0001533	4	C	7	7	1002	965	7226	761	869	12694	1110	1177	-0.246721	0.149124	0.246721	1.65447	0.0542817	-0.19146	-0.245741	1
3743	orf19.1747	CAL0000859	KIP2	CAL0000859	2	C	38	21	436	398	2006	792	600	3368	1998	2011	0.266949	0.161409	0.266949	1.65387	0.13156	0.400538	0.268978	1
2660	orf19.806	CAL0002611		CAL0002611	2	C	2	3	529	521	3062	1203	919	9320	357	496	0.365209	0.220895	0.365209	1.65331	0.0219843	0.3885	0.366516	1
5059	orf19.2397	CAL0000842		CAL0000842	R	W	3	3	16	28	765	29	112	1555	1506	1520	-1.16886	0.707329	1.16886	1.6525	-0.807355	-1.94937	-1.14202	1
1295	orf19.3331	CAL0004112	ABC1	CAL0004112	1	W	4	3	62	72	2757	198	348	7202	1701	1720	-0.596381	0.361047	0.596381	1.65181	-0.215729	-0.813587	-0.597858	1
4533	orf19.194	CAL0003276		CAL0003276	2	W	6	7	278	231	4327	175	193	3419	1608	1651	-0.403204	0.244153	0.403204	1.65144	0.267192	-0.141246	-0.408438	1
5756	orf19.2077	CAL0004500	ZCF9	CAL0004500	2	W	12	10	20	36	493	60	59	593	2505	2505	0.883745	0.535701	0.883745	1.6497	-0.847997	0.0242475	0.872244	1
1676	orf19.4546	CAL0002764	MAK32	CAL0002764	1	C	12	9	125	153	1406	125	104	1685	1875	1888	0.565966	0.343101	0.565966	1.64956	-0.291604	0.265345	0.556948	1
1753	orf19.4228	CAL0000144		CAL0000144	5	W	9	6	619	653	5374	1111	1437	10454	984	1049	-0.293171	0.178176	0.293171	1.6454	-0.0771436	-0.371201	-0.294058	1
2098	orf19.5665	CAL0000693		CAL0000693	4	W	4	4	163	149	2922	257	173	4128	984	1029	0.450358	0.273862	0.450358	1.64447	0.12956	0.570996	0.441437	1
675	orf19.4788	CAL0004595		CAL0004595	1	C	20	13	162	91	1455	309	234	3397	2574	2583	-0.433147	0.263645	0.433147	1.64292	0.832055	0.401098	-0.430957	1
673	orf19.4003	CAL0004642	CCT3	CAL0004642	5	C	10	4	171	99	3544	73	72	2526	2355	2360	-0.767437	0.467338	0.767437	1.64215	0.788496	0.0198996	-0.768596	1
1123	orf19.5225	CAL0003523	RPL27A	CAL0003523	1	C	2	4	191	241	1509	130	112	1016	378	519	0.54866	0.334148	0.54866	1.64197	-0.335461	0.215013	0.550473	1
1667	orf19.1255	CAL0002955	ZCF5	CAL0002955	4	W	9	7	57	36	788	89	92	1657	2919	2932	-0.717881	0.437915	0.717881	1.63932	0.662965	-0.0478285	-0.710794	1
5419	orf19.1409.1	CAF0007454		CAF0007454	4	W	1	1	2863	3441	57268	13687	22646	356365	375	376	-0.431298	0.263168	0.431298	1.63887	-0.2653	-0.72645	-0.46115	1
4602	orf19.2998	CAL0006160	TSR2	CAL0006160	1	C	4	3	320	212	3069	559	478	7642	630	657	-0.364242	0.222265	0.364242	1.63877	0.594008	0.225838	-0.36817	1
2626	orf19.1491	CAL0004776		CAL0004776	2	C	5	4	101	81	2188	73	91	2797	1845	1859	-0.625913	0.382142	0.625913	1.63791	0.318361	-0.31797	-0.636332	1
551	orf19.740	CAL0001831	DOT1	CAL0001831	4	C	-1	6	110	78	856	449	230	3337	24	25	0.46952	0.286794	0.46952	1.63713	0.495957	0.965082	0.469124	1
5500	orf19.5578	CAL0006244	TEL1	CAL0006244	6	W	23	9	156	191	1198	121	203	1238	1692	1737	-0.454767	0.277839	0.454767	1.6368	-0.292027	-0.746473	-0.454446	1
2287	orf19.1813	CAL0001600	FLC2	CAL0001600	R	W	24	17	365	459	3626	670	711	6119	2436	2517	0.243488	0.149002	0.243488	1.63413	-0.330598	-0.0856885	0.244909	1
2478	orf19.3764	CAL0001244	RAX2	CAL0001244	1	W	6	4	61	34	2053	23	26	1069	2280	2294	-0.987381	0.605157	0.987381	1.63161	0.843274	-0.176878	-1.02015	1
5330	orf19.1296	CAL0003106		CAL0003106	2	C	11	7	268	226	2465	162	91	1579	1713	1766	0.605367	0.371908	0.605367	1.62773	0.24591	0.832055	0.586145	1
4073	orf19.748	CAL0001840		CAL0001840	4	C	14	12	474	493	10250	665	585	15442	4251	4281	0.241394	0.148314	0.241394	1.62759	-0.0567006	0.184918	0.241618	1
5173	orf19.1797	CAL0001000		CAL0001000	4	C	11	6	69	87	783	48	34	586	1188	1188	0.827284	0.50832	0.827284	1.62749	-0.334419	0.4975	0.831919	1
5329	orf19.4432	CAL0001809	CPH1	CAL0001809	1	C	3	2	54	45	2743	35	14	3178	2853	2864	1.11366	0.685203	1.11366	1.62531	0.263034	1.32193	1.05889	1
581	orf19.4522	CAL0002686		CAL0002686	1	C	3	4	59	26	393	190	135	1489	444	589	-0.692117	0.426639	0.692117	1.62225	1.1822	0.49304	-0.689163	1
1183	orf19.2005	CAL0004320	REG1	CAL0004320	2	C	20	13	426	370	4040	898	914	12485	3036	3058	-0.232342	0.143471	0.232342	1.61944	0.203328	-0.0254787	-0.228807	1
4811	orf19.3793	CAL0001309	CSR1	CAL0001309	4	W	10	7	77	77	912	267	185	2200	1176	1231	0.524324	0.323835	0.524324	1.61911	0	0.529314	0.529314	1
4798	orf19.269	CAL0004049	SES1	CAL0004049	3	W	4	4	1865	2128	46705	3012	2879	92346	1377	1502	0.266643	0.164999	0.266643	1.61603	-0.190323	0.065154	0.255477	1
620	orf19.4889	CAL0005508	DAP1	CAL0005508	1	C	8	7	331	321	5435	383	272	3869	1755	1784	0.445633	0.275943	0.445633	1.61495	0.0442579	0.493738	0.44948	1
2213	orf19.3594	CAL0006024	TIF4631	CAL0006024	2	C	3	3	40	41	358	48	26	395	336	349	0.948217	0.587872	0.948217	1.61297	-0.0356239	0.884523	0.920147	1
2163	orf19.1706	CAL0000763	MET18	CAL0000763	3	C	-1	14	447	464	5171	671	563	8296	1095	3279	0.306192	0.189912	0.306192	1.61228	-0.05385	0.253178	0.307028	1
5611	orf19.1889	CAL0001798		CAL0001798	2	W	4	3	677	650	8472	1449	1164	20483	723	761	0.253944	0.157697	0.253944	1.61033	0.0587161	0.315967	0.25725	1
4242	orf19.6235	CAL0000478		CAL0000478	1	W	7	3	48	39	213	88	116	771	387	400	-0.695559	0.432263	0.695559	1.60911	0.29956	-0.398549	-0.69811	1
4485	orf19.4783	CAL0004585	CRP1	CAL0004585	1	C	10	6	66	56	588	12	24	290	1425	1436	-1.25048	0.77828	1.25048	1.60673	0.237039	-1	-1.23704	1
3925	orf19.4459	CAL0001881		CAL0001881	1	C	17	15	79	63	513	183	211	1079	1692	1704	-0.538592	0.335632	0.538592	1.60471	0.326501	-0.205399	-0.5319	1
5868	orf19.3428	CAL0004935	FGR47	CAL0004935	6	W	3	3	113	146	4343	320	294	10523	1482	1975	0.522106	0.325379	0.522106	1.60461	-0.369646	0.122256	0.491901	1
5469	orf19.4625	CAL0003642		CAL0003642	4	W	1	2	154	140	3137	118	169	4863	393	570	-0.693828	0.432674	0.693828	1.60358	0.137504	-0.518236	-0.65574	1
5214	orf19.6927	CAL0000210		CAL0000210	3	C	5	5	114	142	2144	196	325	2996	1044	1131	-0.413053	0.257753	0.413053	1.60251	-0.316857	-0.729586	-0.412729	1
35	orf19.1163	CAL0002071		CAL0002071	1	C	1	1	5	12	1094	14	9	1610	1092	1118	1.97277	1.23139	1.97277	1.60207	-1.26303	0.63743	1.90046	1
4656	orf19.1279	CAL0003024	CDS1	CAL0003024	5	W	4	2	192	231	5245	806	794	9365	1356	1449	0.290471	0.181371	0.290471	1.60153	-0.266787	0.0216408	0.288427	1
65	orf19.758	CAL0001870	ZCF39	CAL0001870	1	C	2	3	32	105	757	6	55	633	372	580	-1.43511	0.896376	1.43511	1.60101	-1.71425	-3.1964	-1.48215	1
3338	orf19.6131	CAL0006004		CAL0006004	R	C	10	6	233	220	1636	324	401	2669	933	941	-0.37238	0.232786	0.37238	1.59967	0.0828264	-0.307608	-0.390435	1
3043	orf19.4307	CAL0000893	HSL1	CAL0000893	5	W	6	1	44	50	1926	75	44	4403	879	879	0.942898	0.590808	0.942898	1.59595	-0.184425	0.769387	0.953812	1
4159	orf19.4817	CAL0005317		CAL0005317	1	W	4	4	89	61	1258	169	175	2278	921	1005	-0.604325	0.378667	0.604325	1.59593	0.544996	-0.0503317	-0.595328	1
5716	orf19.1442	CAL0004588	PLB4.5	CAL0004588	2	W	8	6	218	167	4413	434	252	7933	2109	2123	0.400694	0.251084	0.400694	1.59586	0.38448	0.784271	0.399791	1
1517	orf19.1798	CAL0001001	TSC2	CAL0001001	4	C	34	22	155	188	1540	135	115	1406	4476	4476	0.501442	0.314566	0.501442	1.59408	-0.278464	0.231326	0.50979	1
3987	orf19.3535	CAL0005881		CAL0005881	2	C	1	1	158	114	3880	82	91	8519	867	918	-0.722122	0.453965	0.722122	1.5907	0.470891	-0.150243	-0.621133	1
1383	orf19.2738	CAL0004221	SUL2	CAL0004221	4	C	8	8	25	28	569	17	38	554	2481	2481	-1.03697	0.651978	1.03697	1.59051	-0.163499	-1.16046	-0.996966	1
4043	orf19.1229	CAL0002842		CAL0002842	1	C	14	13	648	541	10686	997	1003	17831	3138	3293	-0.268549	0.168902	0.268549	1.58997	0.260365	-0.0086562	-0.269021	1
5515	orf19.2749	CAL0004234		CAL0004234	4	C	4	4	47	46	929	73	40	1056	1476	1478	0.89134	0.560655	0.89134	1.58982	0.0310269	0.867896	0.83687	1
606	orf19.2026	CAL0004364	UBP13	CAL0004364	2	C	10	10	114	140	1517	57	109	1394	2103	2126	-0.657078	0.413368	0.657078	1.58957	-0.296393	-0.935294	-0.638901	1
1094	orf19.861	CAL0002806		CAL0002806	2	C	1	1	10	13	453	35	23	1661	531	569	1.0996	0.692428	1.0996	1.58804	-0.378512	0.605721	0.984233	1
538	orf19.125	CAL0003035	EBP1	CAL0003035	6	C	5	4	36	49	648	81	58	1352	1224	1235	0.915343	0.577278	0.915343	1.58562	-0.444785	0.481869	0.926654	1
2900	orf19.5114	CAL0002510		CAL0002510	1	C	3	3	17	34	295	102	118	1305	474	493	0.863575	0.54494	0.863575	1.58472	-1	-0.210218	0.789782	1
393	orf19.4772	CAL0004546	AOX2	CAL0004546	1	C	8	5	123	159	1945	186	178	4110	1167	1179	0.433627	0.274833	0.433627	1.57778	-0.370368	0.0634254	0.433794	1
3431	orf19.4759	CAL0004492		CAL0004492	1	C	0	2	1018	1492	33423	72	58	141476	498	832	0.777597	0.493132	0.777597	1.57685	-0.55151	0.311944	0.863454	1
2330	orf19.5861	CAL0002403		CAL0002403	3	W	5	5	460	302	4981	984	775	12234	816	1044	-0.266965	0.169658	0.266965	1.57355	0.607085	0.344462	-0.262623	1
1798	orf19.2461	CAL0001579	PRN4	CAL0001579	1	W	13	6	268	256	1881	391	289	3086	987	1000	0.366136	0.233022	0.366136	1.57125	0.0660892	0.436099	0.37001	1
1363	orf19.2819	CAL0005061		CAL0005061	R	W	6	4	45	52	324	10	32	442	654	693	-1.57668	1.00365	1.57668	1.57094	-0.208587	-1.67807	-1.46949	1
2264	orf19.5197	CAL0002735	NOP4	CAL0002735	1	C	-1	8	2546	2338	52274	6477	6798	175437	78	79	-0.191308	0.121795	0.191308	1.57074	0.122957	-0.0697846	-0.192742	1
5908	orf19.4867	CAL0005438	SFU1	CAL0005438	1	C	20	18	184	185	2313	295	373	4766	3537	3588	-0.328925	0.209448	0.328925	1.57044	-0.0078195	-0.338461	-0.330641	1
5052	orf19.1047	CAL0001157	ERB1	CAL0001157	1	W	2	2	307	284	12999	700	517	52152	2550	2576	0.329553	0.210004	0.329553	1.56927	0.112348	0.437191	0.324843	1
4694	orf19.325	CAL0004705		CAL0004705	3	W	13	8	273	254	4851	284	337	6459	2796	2811	-0.350353	0.223353	0.350353	1.56861	0.104072	-0.246858	-0.35093	1
4046	orf19.4738	CAL0004434	MSS116	CAL0004434	1	W	10	6	127	131	1634	113	84	1100	1677	1690	0.471933	0.300916	0.471933	1.56832	-0.0447383	0.427862	0.4726	1
5608	orf19.2524	CAL0002414	MGE1	CAL0002414	R	W	3	3	320	334	8018	1093	1331	34899	729	867	-0.224325	0.143105	0.224325	1.56756	-0.0617762	-0.284217	-0.222441	1
4351	orf19.73	CAL0000656		CAL0000656	6	W	13	11	517	283	7457	354	257	4579	2985	2998	-0.401804	0.256477	0.401804	1.56663	0.869362	0.461981	-0.407381	1
4016	orf19.5539	CAL0006150	SAP6	CAL0006150	6	W	6	5	96	124	856	108	93	1210	843	867	0.589422	0.376459	0.589422	1.5657	-0.369234	0.215729	0.584963	1
1648	orf19.5054	CAL0001685		CAL0001685	1	W	5	4	398	455	4295	445	629	7520	903	925	-0.316189	0.20197	0.316189	1.56552	-0.193098	-0.499255	-0.306157	1
563	orf19.721	CAL0001772		CAL0001772	R	W	15	11	177	122	1811	210	192	2432	2061	2119	-0.406188	0.259593	0.406188	1.56471	0.536868	0.129283	-0.407585	1
1445	orf19.2407	CAL0001457	DPS1-1	CAL0001457	R	W	2	2	1078	1039	29946	863	643	102055	1737	1800	0.351734	0.224957	0.351734	1.56356	0.0531615	0.424542	0.37138	1
1619	orf19.238	CAL0003960	CCP1	CAL0003960	3	C	8	7	2744	4173	33705	3102	4009	47314	1101	1229	0.23111	0.14783	0.23111	1.56335	-0.604804	-0.370044	0.234761	1
4345	orf19.831	CAL0002711		CAL0002711	2	C	11	7	155	225	2548	322	358	4136	1518	1554	0.385345	0.246665	0.385345	1.56222	-0.537657	-0.152899	0.384758	1
829	orf19.2506	CAL0002364		CAL0002364	3	W	7	4	20	13	519	5	12	632	1794	1794	-2.00663	1.28588	2.00663	1.56051	0.621488	-1.26303	-1.88452	1
4946	orf19.339	CAL0004762	ADK1	CAL0004762	3	C	1	1	159	154	29710	210	148	58429	1725	1853	0.484018	0.310445	0.484018	1.55911	0.0460964	0.504792	0.458696	1
1262	orf19.1808	CAL0001584	MED5	CAL0001584	R	W	15	12	283	273	4298	116	75	1798	3111	3129	0.567676	0.364267	0.567676	1.55841	0.0519011	0.629162	0.577261	1
2719	orf19.2618	CAL0003388	MET2	CAL0003388	R	W	4	5	753	775	7214	186	258	7960	1230	1393	-0.446898	0.286803	0.446898	1.55821	-0.0415464	-0.472068	-0.430522	1
4732	orf19.3167	CAL0002370		CAL0002370	5	W	3	2	95	111	3898	160	126	3275	1386	1399	0.568054	0.364607	0.568054	1.55799	-0.22456	0.344648	0.569208	1
2903	orf19.3128	CAL0002269		CAL0002269	4	C	11	7	487	500	5156	790	691	10408	1923	1975	0.229865	0.147732	0.229865	1.55596	-0.0380063	0.193167	0.231173	1
631	orf19.655	CAL0001031	STE18	CAL0001031	1	W	11	10	1386	1440	21442	2550	2970	69687	1638	1816	-0.163851	0.105438	0.163851	1.554	-0.0551416	-0.219966	-0.164824	1
565	orf19.3858	CAL0002092		CAL0002092	R	W	3	3	70	72	1301	90	144	2893	774	793	-0.646498	0.416031	0.646498	1.55397	-0.040642	-0.678072	-0.63743	1
899	orf19.251	CAL0004002	GLX3	CAL0004002	3	C	13	8	1122	380	3969	884	359	4908	711	784	-0.255476	0.164426	0.255476	1.55374	1.562	1.30006	-0.261939	1
5992	orf19.4349	CAL0001022	ULP2	CAL0001022	5	C	28	19	385	259	2305	1156	922	7588	2448	2461	-0.246469	0.158685	0.246469	1.5532	0.571906	0.326303	-0.245604	1
3195	orf19.254	CAL0004007		CAL0004007	3	C	14	8	89	132	759	12	37	244	1269	1272	-1.11439	0.717612	1.11439	1.55291	-0.568661	-1.62449	-1.05583	1
2028	orf19.2606	CAL0003359	HDA1	CAL0003359	R	C	12	11	303	277	3892	319	379	5981	2502	2511	-0.378757	0.243969	0.378757	1.55248	0.129432	-0.248641	-0.378073	1
1865	orf19.3399	CAL0004226	GIT1	CAL0004226	6	W	10	8	164	148	1956	115	143	3435	2295	2308	-0.460414	0.296659	0.460414	1.552	0.148099	-0.314381	-0.46248	1
452	orf19.3526	CAL0005849	CYT1	CAL0005849	2	C	5	5	53	60	1483	36	70	2220	1665	1697	-0.786531	0.506813	0.786531	1.55192	-0.17897	-0.959358	-0.780388	1
4610	orf19.4801	CAL0005287	FTH1	CAL0005287	1	W	10	5	64	48	1076	66	28	1252	1398	1398	0.840595	0.542	0.840595	1.55091	0.415037	1.23704	0.822002	1
3493	orf19.5040	CAL0001665		CAL0001665	4	W	3	2	54	70	4989	384	314	13722	1779	1843	0.65018	0.419771	0.65018	1.54889	-0.374396	0.290342	0.664737	1
5844	orf19.2951	CAL0006049	HOM6	CAL0006049	1	C	1	1	310	360	22746	418	653	59706	1080	1135	-0.416085	0.268838	0.416085	1.54772	-0.215729	-0.64358	-0.427851	1
138	orf19.1267.1	CAF0006921		CAF0006921	4	W	2	1	224	196	3419	387	270	8451	267	332	0.330573	0.213755	0.330573	1.5465	0.192645	0.519374	0.326729	1
4508	orf19.680	CAL0001128		CAL0001128	1	C	4	4	1530	1514	19557	1695	1362	28595	1410	1524	0.306759	0.198475	0.306759	1.54558	0.0151664	0.315559	0.300392	1
3956	orf19.2138	CAL0005329	ILS1	CAL0005329	6	W	19	14	3866	4555	36487	4627	5038	96998	3267	3299	0.115394	0.074666	0.115394	1.54547	-0.236609	-0.122774	0.113835	1
2735	orf19.1203	CAL0002765	SRO77	CAL0002765	6	C	6	5	55	52	2307	52	80	3606	3231	3256	-0.705625	0.457827	0.705625	1.54125	0.08092	-0.621488	-0.702408	1
6143	orf19.184	CAL0003245	MDM10	CAL0003245	2	C	3	3	34	33	1096	18	37	1415	1422	1427	-1.09324	0.710392	1.09324	1.53893	0.0430687	-1.03953	-1.0826	1
2523	orf19.4845	CAL0005379		CAL0005379	1	C	5	4	726	820	4743	529	717	5764	522	574	-0.259289	0.168655	0.259289	1.53739	-0.175654	-0.438705	-0.263051	1
4060	orf19.5722	CAL0001395		CAL0001395	6	C	13	10	343	210	2405	324	259	2601	1620	1677	-0.395854	0.257613	0.395854	1.53662	0.707819	0.323042	-0.384778	1
4626	orf19.4831	CAL0005352	MLS1	CAL0005352	1	W	1	1	171	211	30427	146	243	48023	1542	1646	-0.430211	0.280115	0.430211	1.53584	-0.303247	-0.734988	-0.431741	1
2435	orf19.3161	CAL0002361		CAL0002361	5	C	5	5	169	215	2842	689	689	11025	963	985	0.347945	0.226685	0.347945	1.53493	-0.347313	0	0.347313	1
3487	orf19.2501	CAL0002353	FLC1	CAL0002353	3	W	6	7	166	102	2895	250	213	6874	2427	2448	-0.471578	0.307275	0.471578	1.53471	0.702614	0.231075	-0.471539	1
3048	orf19.1563	CAL0005563	ECM3	CAL0005563	2	W	13	7	178	149	2232	84	99	1729	1641	1655	-0.493458	0.321767	0.493458	1.53359	0.256565	-0.237039	-0.493604	1
1488	orf19.2996	CAL0006159		CAL0006159	1	W	7	6	85	68	1922	29	40	1342	3156	3171	-0.79554	0.518792	0.79554	1.53345	0.321928	-0.463947	-0.785875	1
416	orf19.6266	CAL0000542		CAL0000542	1	C	10	8	398	335	5677	96	57	2099	2616	2632	0.513119	0.334658	0.513119	1.53326	0.248607	0.752072	0.503465	1
4373	orf19.384	CAL0004918		CAL0004918	1	C	14	12	280	261	2775	277	314	2855	1677	1721	-0.286246	0.186754	0.286246	1.53274	0.101377	-0.180879	-0.282256	1
2119	orf19.457	CAL0005737		CAL0005737	R	W	21	16	301	309	3540	359	449	5045	3915	3930	-0.286045	0.186957	0.286045	1.53	-0.0378434	-0.322732	-0.284888	1
3357	orf19.4980	CAL0000006		CAL0000006	1	W	6	7	486	927	24792	2878	1772	157726	1971	2240	1.36441	0.8918	1.36441	1.52995	-0.931613	0.699688	1.6313	1
5650	orf19.4871	CAL0005461		CAL0005461	1	W	13	10	469	530	5458	1376	1342	11138	1743	1757	0.213038	0.13927	0.213038	1.52968	-0.176404	0.0360958	0.2125	1
2636	orf19.5235	CAL0003540		CAL0003540	1	C	2	3	610	777	9079	538	1080	11671	699	749	-0.632786	0.413998	0.632786	1.52848	-0.349105	-1.00535	-0.656248	1
2689	orf19.4780	CAL0004582	GRP1	CAL0004582	1	W	6	4	58	53	1384	76	42	1414	1374	1388	0.729893	0.478142	0.729893	1.52652	0.130061	0.85561	0.72555	1
1824	orf19.2832	CAL0005109	INN1	CAL0005109	R	W	12	8	161	200	1689	344	334	4067	1980	1990	0.357708	0.234496	0.357708	1.52543	-0.312939	0.0425605	0.3555	1
5165	orf19.6234	CAL0000477	RAC1	CAL0000477	1	C	16	9	440	474	3813	1664	1517	10875	1605	1615	0.241406	0.158594	0.241406	1.52216	-0.107384	0.133434	0.240818	1
2712	orf19.5751	CAL0001465		CAL0001465	6	C	3	4	149	117	1437	321	184	7125	807	858	0.446281	0.293239	0.446281	1.5219	0.348804	0.802868	0.454064	1
5883	orf19.2489	CAL0001639		CAL0001639	1	C	7	7	805	774	35990	4186	3517	117608	3330	3431	0.193034	0.127081	0.193034	1.51898	0.0566552	0.251227	0.194572	1
3426	orf19.3013	CAL0001344	CDC12	CAL0001344	1	C	-1	2	171	197	6824	238	371	21533	6	7	-0.441212	0.290856	0.441212	1.51694	-0.204199	-0.640458	-0.436258	1
4013	orf19.1066	CAL0001209	GIG1	CAL0001209	1	C	10	6	49	86	420	120	140	636	765	780	0.594674	0.392069	0.594674	1.51676	-0.811555	-0.222392	0.589162	1
4770	orf19.1221	CAL0002829	ALG2	CAL0002829	6	W	5	4	93	118	3301	69	54	2991	1338	1352	0.729619	0.481654	0.729619	1.51482	-0.343484	0.353637	0.697121	1
5320	orf19.522	CAL0000116		CAL0000116	R	W	8	8	279	305	6853	495	696	18391	3237	3255	-0.348099	0.229851	0.348099	1.51446	-0.128544	-0.491659	-0.363115	1
309	orf19.2956	CAL0006053	MGM101	CAL0006053	1	C	1	1	45	34	2430	67	81	4781	828	849	-0.66504	0.440218	0.66504	1.51071	0.40439	-0.273761	-0.678151	1
1699	orf19.2735	CAL0004215	SEN2	CAL0004215	4	C	6	4	542	455	5189	55	69	1768	1170	1189	-0.574216	0.380505	0.574216	1.50909	0.252426	-0.327165	-0.579591	1
5588	orf19.6367	CAL0001367		CAL0001367	R	W	5	5	3836	3897	116605	47262	42529	1228985	1842	2011	0.171994	0.114041	0.171994	1.50818	-0.0227612	0.152234	0.174995	1
2675	orf19.4726	CAL0004401		CAL0004401	1	C	6	6	342	289	1741	425	294	3923	576	627	0.292363	0.193859	0.292363	1.50812	0.242927	0.531647	0.28872	1
3980	orf19.2755	CAL0004239		CAL0004239	4	C	1	2	526	499	13013	334	256	21619	738	884	0.308321	0.20467	0.308321	1.50643	0.076023	0.383704	0.307681	1
3402	orf19.2258	CAL0006297		CAL0006297	2	C	14	9	98	88	594	148	95	862	1185	1195	0.494481	0.328483	0.494481	1.50535	0.155278	0.639598	0.48432	1
5934	orf19.3672	CAL0000448		CAL0000448	1	W	3	2	34	22	1956	26	8	1510	2028	2038	1.1213	0.746625	1.1213	1.50182	0.628031	1.70044	1.07241	1
1460	orf19.6630	CAF0007071		CAF0007071	R	C	2	1	139	128	1743	90	118	2422	405	438	-0.519012	0.345846	0.519012	1.5007	0.118941	-0.39079	-0.509731	1
5064	orf19.1988	CAL0002709	CDC45	CAL0002709	R	C	13	8	182	277	1582	160	183	2141	1740	1746	0.422789	0.282838	0.422789	1.49481	-0.605948	-0.193772	0.412176	1
1875	orf19.1136	CAL0001966		CAL0001966	1	C	4	3	104	45	692	122	83	904	438	463	-0.658879	0.440992	0.658879	1.49408	1.20859	0.555698	-0.652889	1
3814	orf19.4713	CAL0004369		CAL0004369	1	W	7	7	102	107	2841	54	34	2800	2577	2933	0.751489	0.503186	0.751489	1.49346	-0.0690416	0.667425	0.736466	1
379	orf19.4076	CAL0004909	MIT1	CAL0004909	2	C	1	1	43	65	12204	42	30	12187	3285	3347	1.18183	0.79238	1.18183	1.4915	-0.596103	0.485427	1.08153	1
5726	orf19.5165	CAL0002627	DBF4	CAL0002627	7	C	4	4	54	44	1093	77	101	2428	1128	1134	-0.695114	0.466068	0.695114	1.49144	0.295456	-0.391425	-0.686881	1
3267	orf19.2063	CAL0004465		CAL0004465	2	W	4	4	40	34	1769	20	30	1117	3471	3471	-0.843523	0.565695	0.843523	1.49113	0.234465	-0.584963	-0.819428	1
128	orf19.1601	CAL0006304	RPL3	CAL0006304	2	W	3	2	4659	4671	183368	60732	66429	1222485	1170	1266	-0.133556	0.089591	0.133556	1.49073	-0.00371111	-0.129356	-0.125645	1
100	orf19.1335	CAL0003794		CAL0003794	7	C	6	6	265	164	8414	746	374	19643	3189	3201	0.307434	0.206279	0.307434	1.49038	0.692297	0.996137	0.303841	1
409	orf19.1945	CAL0002586	AUR1	CAL0002586	5	W	3	3	19	22	663	124	85	4091	1416	1430	0.770813	0.517523	0.770813	1.48943	-0.211504	0.544805	0.756309	1
5246	orf19.1382	CAL0003940	YEA4	CAL0003940	2	W	4	2	52	34	911	11	19	390	981	1053	-1.34332	0.902796	1.34332	1.48796	0.612977	-0.788496	-1.40147	1
4848	orf19.2927	CAL0005995	MNN11	CAL0005995	1	C	2	3	87	61	3196	223	229	4178	1338	1406	-0.536383	0.360585	0.536383	1.48754	0.512206	-0.0383039	-0.55051	1
1696	orf19.6453	CAL0002228		CAL0002228	7	W	20	15	177	147	2534	147	167	2037	3945	3956	-0.453125	0.30462	0.453125	1.48751	0.267933	-0.184032	-0.451965	1
2170	orf19.6464	CAL0002255		CAL0002255	7	W	8	8	220	108	2389	96	73	1627	1854	1868	-0.627968	0.422513	0.627968	1.48627	1.02647	0.395138	-0.631334	1
2583	orf19.4191.1	CAF0007003	CDC14	CAF0007003	4	W	2	2	25	22	2389	32	59	1748	2919	2933	-1.06045	0.713755	1.06045	1.48573	0.184425	-0.882643	-1.06707	1
225	orf19.3182	CAL0002417	GIS2	CAL0002417	5	W	2	6	3172	2845	28556	5032	5151	142884	528	1028	-0.18895	0.127268	0.18895	1.48466	0.156964	-0.0337206	-0.190685	1
3762	orf19.2382	CAL0000808		CAL0000808	R	W	16	15	408	316	3934	281	270	4379	2922	2935	-0.307374	0.207039	0.307374	1.48462	0.368645	0.0576107	-0.311034	1
5724	orf19.6360	CAL0001356		CAL0001356	1	C	6	4	64	66	613	206	152	1654	675	687	0.504742	0.340502	0.504742	1.48235	-0.0443941	0.438573	0.482967	1
3934	orf19.4357	CAL0001045		CAL0001045	R	C	6	7	298	373	5113	282	432	3535	1665	1677	-0.28687	0.193711	0.28687	1.48092	-0.323863	-0.615336	-0.291473	1
3616	orf19.825	CAL0002680	RPL39	CAL0002680	2	W	7	7	530	513	5067	1009	1169	12917	1098	1119	-0.260217	0.176014	0.260217	1.47839	0.0470335	-0.212349	-0.259382	1
4178	orf19.894	CAL0002929	VPS20	CAL0002929	2	W	16	7	92	75	972	64	83	1011	2091	2091	-0.68813	0.46547	0.68813	1.47836	0.294743	-0.375039	-0.669783	1
1922	orf19.1986	CAL0002708	ARO2	CAL0002708	R	W	12	10	2111	3010	17239	4659	5986	54093	1242	1320	0.14747	0.09976	0.14747	1.47825	-0.511837	-0.361572	0.150265	1
6201	orf19.1861	CAL0001728		CAL0001728	2	W	10	11	116	108	1414	136	179	1294	1875	1895	-0.524056	0.354541	0.524056	1.47813	0.103093	-0.396353	-0.499446	1
6194	orf19.1433	CAL0004553		CAL0004553	2	W	7	5	172	277	2100	84	98	1789	1194	1210	0.455682	0.308371	0.455682	1.47771	-0.687477	-0.222392	0.465085	1
5797	orf19.663	CAL0001054	VMA2	CAL0001054	1	C	8	6	192	215	6837	471	428	15242	4050	4068	0.302977	0.205177	0.302977	1.47666	-0.16323	0.138116	0.301347	1
141	orf19.5238	CAL0003543		CAL0003543	1	C	10	6	225	213	3521	983	1113	12243	1818	1914	-0.258381	0.175122	0.258381	1.47543	0.0790716	-0.17919	-0.258262	1
404	orf19.264	CAL0004035		CAL0004035	3	W	22	10	130	101	857	233	246	1484	1353	1380	-0.439502	0.297974	0.439502	1.47497	0.364156	-0.0783284	-0.442485	1
3435	orf19.17	CAL0000508	SCP1	CAL0000508	2	C	4	4	47	135	862	55	245	1722	585	596	-0.639512	0.433673	0.639512	1.47464	-1.52223	-2.15528	-0.633051	1
232	orf19.1834	CAL0001654		CAL0001654	1	C	10	9	83	43	2178	232	172	2001	2733	2737	-0.525521	0.356727	0.525521	1.47317	0.948775	0.431716	-0.517058	1
1675	orf19.5198	CAL0002736		CAL0002736	1	C	8	6	337	342	8780	1191	1523	34904	2226	2245	-0.337879	0.229485	0.337879	1.47234	-0.0212477	-0.354743	-0.333495	1
4390	orf19.3321	CAL0004088	MRS7	CAL0004088	1	W	3	2	336	300	9932	80	116	11957	1527	1770	-0.770276	0.523644	0.770276	1.47099	0.163499	-0.536053	-0.699552	1
1702	orf19.2665	CAL0003494	MSN5	CAL0003494	4	W	4	4	55	57	4893	94	148	6322	3738	3872	-0.594986	0.404576	0.594986	1.47064	-0.0515303	-0.654865	-0.603334	1
268	orf19.3527	CAL0005851		CAL0005851	2	C	5	8	5988	6480	66899	5265	4831	88871	867	1418	0.233987	0.15922	0.233987	1.46958	-0.11392	0.124112	0.238031	1
2537	orf19.3931	CAL0002928		CAL0002928	5	C	7	5	56	44	394	79	94	828	912	925	-0.587315	0.399854	0.587315	1.46882	0.347923	-0.250808	-0.598731	1
6191	orf19.6852.1	CAL0120932		CAL0120932	1	W	1	1	87	117	1968	341	297	4611	189	252	0.612085	0.416779	0.612085	1.46861	-0.427421	0.199309	0.62673	1
5414	orf19.4627	CAL0003646		CAL0003646	4	W	19	14	614	601	8042	554	647	9055	3345	3359	-0.25427	0.173167	0.25427	1.46835	0.0308737	-0.22388	-0.254753	1
3580	orf19.4629	CAL0003650	CPA1	CAL0003650	4	C	10	8	61	60	1956	85	123	1887	2901	2910	-0.569381	0.387972	0.569381	1.46758	0.0238467	-0.533124	-0.55697	1
678	orf19.4624	CAL0003640	TOA2	CAL0003640	4	C	5	5	693	679	13137	696	821	17062	1359	1429	-0.263977	0.179878	0.263977	1.46753	0.0294438	-0.238295	-0.267739	1
6104	orf19.2847	CAL0005140		CAL0005140	R	C	12	12	947	957	8202	444	529	5539	1788	1811	-0.237433	0.161794	0.237433	1.4675	-0.0151545	-0.252708	-0.237554	1
2648	orf19.4197	CAL0005894	SLY41	CAL0005894	6	C	3	4	702	628	8822	1005	1079	22970	906	1121	-0.253344	0.172725	0.253344	1.46675	0.160706	-0.102499	-0.263206	1
3168	orf19.677	CAL0001102	ECM29	CAL0001102	1	C	7	5	294	284	3358	966	1182	8693	822	849	-0.325096	0.221787	0.325096	1.4658	0.0499252	-0.291135	-0.34106	1
2710	orf19.537	CAL0000168		CAL0000168	R	C	5	5	45	58	394	149	130	1178	798	810	0.554695	0.378525	0.554695	1.46541	-0.366128	0.196801	0.562929	1
5229	orf19.3006	CAL0001331	GGA2	CAL0001331	1	C	12	9	509	555	5654	1410	1333	20253	1755	1938	0.203518	0.138929	0.203518	1.46491	-0.124822	0.0810184	0.20584	1
1739	orf19.1887	CAL0001796		CAL0001796	2	C	7	5	81	63	1248	36	47	528	1704	1857	-0.743466	0.507765	0.743466	1.46419	0.36257	-0.384664	-0.747234	1
6092	orf19.4490	CAL0002028	QCR8	CAL0002028	2	C	1	4	13872	13983	160919	38542	34838	721856	558	865	0.169913	0.116116	0.169913	1.4633	-0.0114981	0.14577	0.157268	1
5412	orf19.5059	CAL0001690	YDJ1	CAL0001690	1	C	8	5	260	282	6641	327	284	3524	2319	2348	0.312269	0.213467	0.312269	1.46284	-0.117184	0.2034	0.320583	1
5041	orf19.2425	CAL0001498	HGT18	CAL0001498	R	C	8	4	63	92	1009	20	59	845	1491	1491	-1.07608	0.735949	1.07608	1.46217	-0.546282	-1.56071	-1.01443	1
4138	orf19.4911	CAL0006225		CAL0006225	1	W	4	3	88	92	940	58	93	1029	963	1047	-0.61264	0.419534	0.61264	1.46029	-0.0641303	-0.681178	-0.617047	1
5434	orf19.797	CAL0002029		CAL0002029	2	W	34	12	1554	1054	5257	2946	2282	11060	1182	1289	-0.191138	0.131013	0.191138	1.45892	0.560112	0.368459	-0.191653	1
451	orf19.5138	CAL0002555		CAL0002555	7	W	6	5	11	13	430	11	32	351	2274	2288	-1.40749	0.96541	1.40749	1.45792	-0.241008	-1.54057	-1.29956	1
4572	orf19.6156	CAL0006048		CAL0006048	3	C	2	2	67	86	1345	411	386	3441	498	507	0.460628	0.316212	0.460628	1.45671	-0.360176	0.0905375	0.450713	1
5175	orf19.3942	CAL0002978	RPL43A	CAL0002978	5	C	6	7	205	146	848	230	214	1307	591	633	-0.372605	0.255828	0.372605	1.45647	0.489656	0.104023	-0.385632	1
1603	orf19.473	CAL0005793		CAL0005793	R	C	19	14	77	100	774	124	112	1321	2109	2130	0.523831	0.36001	0.523831	1.45505	-0.37707	0.146841	0.523911	1
3284	orf19.2622	CAL0003404	YPT31	CAL0003404	R	C	4	2	500	482	7641	1137	920	12622	669	878	0.246009	0.16912	0.246009	1.45464	0.0528949	0.305526	0.252632	1
4330	orf19.1547	CAL0005510		CAL0005510	2	C	25	5	97	81	365	53	69	371	906	906	-0.669162	0.460331	0.669162	1.45365	0.260063	-0.380604	-0.640667	1
602	orf19.5642	CAL0000637	MET15	CAL0000637	4	W	1	2	556	775	11250	920	1664	27069	414	522	-0.35424	0.244409	0.35424	1.44937	-0.479111	-0.85495	-0.375838	1
5440	orf19.4570	CAL0002860		CAL0002860	4	C	2	2	8	17	265	27	146	956	441	456	-1.30043	0.897742	1.30043	1.44856	-1.08746	-2.43494	-1.34747	1
1020	orf19.6456	CAL0002234		CAL0002234	7	W	5	5	22	41	678	42	39	1514	1677	1691	0.998762	0.690247	0.998762	1.44696	-0.89812	0.106915	1.00504	1
1199	orf19.3899	CAL0002207	CDC42	CAL0002207	5	W	3	3	40	53	436	192	170	1421	387	403	0.570055	0.393979	0.570055	1.44692	-0.405992	0.175572	0.581564	1
1202	orf19.3762	CAL0001242		CAL0001242	1	W	4	4	165	165	1784	107	153	1883	537	575	-0.489858	0.338782	0.489858	1.44594	0	-0.515921	-0.515921	1
2517	orf19.2150	CAL0005361		CAL0005361	6	W	9	9	1784	1749	11266	4562	4114	30186	990	1024	0.120551	0.083402	0.120551	1.44542	0.0285853	0.149125	0.120539	1
5557	orf19.3481	CAL0005084		CAL0005084	6	W	10	7	1278	1334	20465	529	444	6031	1668	1742	0.303669	0.21076	0.303669	1.44083	-0.0618708	0.252708	0.314579	1
5005	orf19.2451	CAL0001553	PGA45	CAL0001553	1	W	10	9	958	925	9270	2277	2459	22300	1392	1667	-0.162881	0.113122	0.162881	1.43987	0.0505723	-0.110937	-0.16151	1
2006	orf19.2825	CAL0005083	DRE2	CAL0005083	R	C	6	5	307	336	3692	376	333	5223	1230	1239	0.320062	0.223082	0.320062	1.43473	-0.130223	0.17521	0.305433	1
4313	orf19.6403.1	CAL0006683		CAL0006683	R	C	-1	2	4007	4749	53625	10097	14755	184549	3	4	-0.32136	0.224175	0.32136	1.43352	-0.245101	-0.547277	-0.302176	1
2076	orf19.1505	CAL0005385		CAL0005385	2	C	3	3	63	116	2481	44	156	1929	1041	1197	-0.974422	0.680463	0.974422	1.432	-0.880701	-1.82597	-0.94527	1
528	orf19.1084	CAL0001252	CDC39	CAL0001252	6	W	31	30	845	749	13140	1190	1179	20252	6051	7008	-0.159886	0.111761	0.159886	1.43061	0.173986	0.0133979	-0.160588	1
2706	orf19.1053	CAL0001187		CAL0001187	1	C	2	1	72	44	3162	14	20	1657	1173	1189	-1.28274	0.897538	1.28274	1.42918	0.710493	-0.514573	-1.22507	1
3820	orf19.6705	CAL0004707		CAL0004707	7	W	6	7	54	46	1557	178	212	7910	3138	3202	-0.474437	0.332246	0.474437	1.42797	0.231326	-0.252187	-0.483513	1
1524	orf19.3550	CAL0005918	DAD2	CAL0005918	2	C	14	11	88	165	1015	173	249	1912	1356	1379	0.377679	0.264546	0.377679	1.42765	-0.906891	-0.525374	0.381517	1
2745	orf19.4002	CAL0004640	TIP20	CAL0004640	5	C	-1	4	91	58	1724	97	42	2506	1572	1573	0.587134	0.411395	0.587134	1.42718	0.649814	1.2076	0.557782	1
3258	orf19.3728	CAL0001149		CAL0001149	R	W	19	9	90	92	1340	208	161	2933	2670	2727	0.415718	0.291416	0.415718	1.42654	-0.0317089	0.369523	0.401232	1
5967	orf19.102	CAL0002963		CAL0002963	6	C	54	18	844	866	1979	1268	1509	3748	1251	1261	-0.215523	0.151092	0.215523	1.42644	-0.037124	-0.251038	-0.213914	1
2608	orf19.3353	CAL0004155		CAL0004155	1	W	2	2	101	110	2996	239	345	6415	684	715	-0.401391	0.281578	0.401391	1.42551	-0.123148	-0.529586	-0.406438	1
4353	orf19.2214	CAL0006187		CAL0006187	2	W	2	2	126	148	4887	805	761	21004	864	878	0.31097	0.218192	0.31097	1.42521	-0.232173	0.0810923	0.313266	1
5328	orf19.5870	CAL0002428		CAL0002428	3	C	-1	5	533	653	5248	544	511	7053	870	871	0.367671	0.258022	0.367671	1.42496	-0.292947	0.0902834	0.383231	1
1093	orf19.1669	CAL0000075	AFG3	CAL0000075	3	W	8	7	293	307	6928	507	640	13197	2388	2442	-0.272325	0.191147	0.272325	1.42469	-0.067338	-0.336086	-0.268748	1
2334	orf19.3034	CAL0001388	RLI1	CAL0001388	1	C	1	3	737	699	24296	142	96	51087	1869	2207	0.517364	0.363397	0.517364	1.42369	0.0763722	0.564785	0.488412	1
5262	orf19.3175	CAL0002397		CAL0002397	5	C	9	10	889	591	6692	959	725	12542	1884	1921	-0.185578	0.130574	0.185578	1.42125	0.589025	0.40355	-0.185475	1
5068	orf19.2404	CAL0001450		CAL0001450	R	C	48	20	707	610	2916	929	924	4819	2340	2350	-0.202064	0.142288	0.202064	1.42011	0.212901	0.00778574	-0.205115	1
227	orf19.2383	CAL0000809	YKU80	CAL0000809	R	C	24	11	126	135	858	154	118	970	1830	1841	0.494379	0.348446	0.494379	1.41881	-0.0995357	0.384143	0.483679	1
744	orf19.4271	CAL0000312		CAL0000312	5	W	2	3	793	1085	9101	2178	2553	18076	306	535	0.221128	0.155881	0.221128	1.41857	-0.452302	-0.22919	0.223113	1
1454	orf19.4326	CAL0000958	CCC2	CAL0000958	5	W	24	12	226	218	1592	373	288	2592	2022	2033	0.316638	0.223259	0.316638	1.41825	0.0519946	0.373107	0.321112	1
2373	orf19.6858	CAL0005806		CAL0005806	4	C	3	2	98	109	5027	250	198	8873	1539	1568	0.516088	0.364091	0.516088	1.41747	-0.153474	0.336428	0.489902	1
5222	orf19.4711	CAL0004367	FGR6-3	CAL0004367	4	W	6	5	56	55	1431	113	159	4710	1815	2720	-0.522915	0.369058	0.522915	1.41689	0.0259952	-0.492704	-0.518699	1
5051	orf19.1761	CAL0000897		CAL0000897	2	W	5	5	927	817	4847	1533	1149	5823	516	639	0.232932	0.16457	0.232932	1.4154	0.182233	0.415979	0.233746	1
5373	orf19.3340	CAL0004132		CAL0004132	1	C	1	1	147	97	10622	332	170	30377	705	849	0.363765	0.257068	0.363765	1.41505	0.59976	0.965648	0.365889	1
389	orf19.5776	CAL0001517		CAL0001517	2	C	17	17	466	461	17909	442	516	25360	9861	9960	-0.238101	0.16856	0.238101	1.41256	0.0155632	-0.223325	-0.238888	1
5197	orf19.3084	CAL0001503		CAL0001503	4	W	6	5	34	40	447	83	63	793	882	887	0.637021	0.451219	0.637021	1.41178	-0.234465	0.39776	0.632225	1
4040	orf19.3203	CAL0003190	RCY1	CAL0003190	5	C	19	13	370	314	2970	129	79	776	2556	2568	0.464703	0.329389	0.464703	1.4108	0.236761	0.707447	0.470686	1
2667	orf19.3010	CAL0001338		CAL0001338	1	W	6	4	111	112	1304	91	62	991	864	885	0.550681	0.391114	0.550681	1.40798	-0.0129391	0.553598	0.566537	1
4524	orf19.2723	CAL0004198	HIT1	CAL0004198	4	W	7	4	46	74	350	141	155	840	447	460	0.545612	0.387812	0.545612	1.4069	-0.685891	-0.136573	0.549318	1
5196	orf19.1596	CAL0005683	FGR28	CAL0005683	4	W	32	0	57	80	373	13	7	51	1797	1797	1.4104	1.0027	1.4104	1.4066	-0.489038	0.893085	1.38212	1
2295	orf19.520	CAL0000113	SIT4	CAL0000113	R	W	10	6	113	141	1232	74	128	1341	1200	1213	-0.477874	0.339841	0.477874	1.40617	-0.319372	-0.790547	-0.471174	1
5382	orf19.4378	CAL0001121	PRP13	CAL0001121	R	C	-1	3	46	30	789	25	28	681	9	10	-0.820312	0.583459	0.820312	1.40595	0.616671	-0.163499	-0.78017	1
948	orf19.3586	CAL0006001	SPO11	CAL0006001	2	W	6	5	62	69	689	184	276	1756	897	911	-0.43376	0.308724	0.43376	1.40501	-0.154328	-0.584963	-0.430634	1
1734	orf19.2611	CAL0003376	MCM6	CAL0003376	R	W	6	6	132	201	6060	580	676	11713	2643	2699	0.371557	0.264511	0.371557	1.40469	-0.606658	-0.22097	0.385687	1
5961	orf19.6923	CAL0000201	HTB1	CAL0000201	3	W	1	1	54	48	1963	22	9	2856	1032	1034	1.16333	0.828301	1.16333	1.40447	0.169925	1.28951	1.11958	1
4352	orf19.2387	CAL0000816		CAL0000816	R	C	7	6	256	269	4110	390	521	5163	1743	1754	-0.335503	0.238913	0.335503	1.40429	-0.0714624	-0.417809	-0.346347	1
2475	orf19.4474	CAL0001956	KTR4	CAL0001956	1	W	2	3	95	48	1539	120	93	3081	927	986	-0.602541	0.42961	0.602541	1.40253	0.984893	0.367732	-0.617161	1
2216	orf19.3611	CAL0000301	PST2	CAL0000301	2	W	0	1	133	91	9232	52	62	22917	474	624	-0.793315	0.56597	0.793315	1.40169	0.547488	-0.253757	-0.801244	1
1013	orf19.492	CAL0005864		CAL0005864	R	C	4	4	922	903	26132	3157	2775	145931	1779	2033	0.156758	0.112065	0.156758	1.39881	0.0300408	0.186066	0.156026	1
1193	orf19.5531	CAL0006137		CAL0006137	6	C	10	7	843	717	5892	1571	1499	17122	1527	1545	-0.171783	0.123106	0.171783	1.39541	0.23356	0.0676828	-0.165877	1
4792	orf19.3990	CAL0003169		CAL0003169	5	W	1	2	131	147	3266	277	228	3652	492	527	0.500544	0.358789	0.500544	1.39509	-0.166249	0.280852	0.447101	1
4067	orf19.5597	CAL0006292	ARG2	CAL0006292	6	W	45	27	1293	1098	6145	932	903	7088	3168	3182	-0.189031	0.135521	0.189031	1.39485	0.235844	0.045604	-0.19024	1
4219	orf19.3439	CAL0004974		CAL0004974	6	C	7	4	6	7	82	20	8	127	954	954	1.69673	1.21742	1.69673	1.39371	-0.222392	1.32193	1.54432	1
890	orf19.2616	CAL0003385	UGT51C1	CAL0003385	R	W	10	10	34	35	973	17	33	1107	4542	4555	-0.919484	0.659747	0.919484	1.39369	-0.0418202	-0.956931	-0.915111	1
4703	orf19.1341	CAL0003821	PRR2	CAL0003821	7	C	8	7	28	37	246	28	21	248	957	969	0.862389	0.618899	0.862389	1.39342	-0.402098	0.415037	0.817136	1
3594	orf19.2190	CAL0005470	VRP1	CAL0005470	2	C	11	9	16	31	587	385	453	5814	1995	2008	0.754753	0.542363	0.754753	1.3916	-0.954196	-0.234653	0.719544	1
3384	orf19.4467	CAL0001919		CAL0001919	1	W	7	7	143	93	1754	140	125	1843	1509	1532	-0.46853	0.336815	0.46853	1.39106	0.620713	0.163499	-0.457214	1
2042	orf19.329	CAL0004717		CAL0004717	3	C	1	1	18	15	993	54	80	7563	1368	1380	-0.906499	0.651968	0.906499	1.3904	0.263034	-0.567041	-0.830075	1
4754	orf19.3023	CAL0001366	NGG1	CAL0001366	1	W	2	2	20	12	1829	27	32	3519	1884	1913	-1.02157	0.735015	1.02157	1.38986	0.736966	-0.245112	-0.982078	1
4663	orf19.3480	CAL0005082		CAL0005082	6	C	13	12	1209	1610	10720	2222	2583	21181	1452	1469	0.195602	0.140829	0.195602	1.38893	-0.413246	-0.217189	0.196058	1
2589	orf19.2540	CAL0002456	SAS3	CAL0002456	R	W	17	14	157	219	1797	98	100	1339	2418	2418	0.448446	0.322946	0.448446	1.38861	-0.480166	-0.0291463	0.45102	1
4166	orf19.1658	CAL0000043		CAL0000043	3	C	-1	2	88	57	2841	485	447	15986	48	49	-0.518909	0.373763	0.518909	1.38834	0.626542	0.11771	-0.508832	1
1992	orf19.564	CAL0000270		CAL0000270	2	C	4	4	25	24	882	54	85	1754	2064	2064	-0.73309	0.528382	0.73309	1.38742	0.0588937	-0.654503	-0.713397	1
5947	orf19.3030	CAL0001380		CAL0001380	1	C	4	3	28	13	402	21	22	730	1590	1604	-1.1328	0.817514	1.1328	1.38567	1.10692	-0.0671142	-1.17403	1
4514	orf19.3689	CAL0000472		CAL0000472	1	C	4	4	136	116	3548	153	177	6376	1632	1641	-0.424128	0.306234	0.424128	1.38498	0.229482	-0.210218	-0.4397	1
2215	orf19.4893	CAL0005521		CAL0005521	1	C	17	13	53	63	1393	123	98	1872	4326	4329	0.589652	0.425792	0.589652	1.38484	-0.249359	0.327805	0.577164	1
5324	orf19.6345	CAL0001323		CAL0001323	1	W	7	6	646	636	26381	2768	2260	79138	2793	2853	0.274896	0.198567	0.274896	1.3844	0.0225074	0.292521	0.270014	1
1070	orf19.1077	CAL0001228	ATM1	CAL0001228	6	C	4	3	19	11	1144	13	20	1423	2253	2265	-1.40104	1.0132	1.40104	1.38279	0.788496	-0.621488	-1.40998	1
5240	orf19.2949	CAL0006042	IML1	CAL0006042	1	W	19	12	124	101	3068	87	99	2080	4374	4397	-0.488574	0.353458	0.488574	1.38227	0.295985	-0.186413	-0.482398	1
3157	orf19.121	CAL0003027	ARC18	CAL0003027	6	C	2	2	275	265	3408	167	124	5244	549	629	0.352372	0.255121	0.352372	1.3812	0.0534393	0.429508	0.376069	1
1043	orf19.6026	CAL0005073	ROT1	CAL0005073	1	C	3	3	584	572	8295	988	1187	10362	654	680	-0.291171	0.210986	0.291171	1.38005	0.0299532	-0.264737	-0.29469	1
5957	orf19.3411	CAL0004890	ATG15	CAL0004890	6	C	6	5	76	103	861	46	38	785	888	894	0.735232	0.533101	0.735232	1.37916	-0.438573	0.275634	0.714207	1
3943	orf19.778	CAL0001950	DUR31	CAL0001950	1	W	3	4	2466	2116	34630	4246	4353	118017	927	1088	-0.259092	0.188306	0.259092	1.37591	0.220833	-0.0359056	-0.256739	1
5023	orf19.3425	CAL0004928	ANB1	CAL0004928	6	W	15	13	126	131	1010	161	122	1283	1800	1801	0.44751	0.325696	0.44751	1.37401	-0.0561431	0.40018	0.456323	1
4678	orf19.3950	CAL0003007	TIP1	CAL0003007	5	C	3	1	14	27	1374	115	129	3720	1734	1746	0.776129	0.565274	0.776129	1.37301	-0.947533	-0.165737	0.781795	1
2360	orf19.4123	CAL0005631	PZF1	CAL0005631	2	C	20	17	432	469	7583	338	310	6421	4827	4840	0.243375	0.177515	0.243375	1.37101	-0.118557	0.124755	0.243312	1
229	orf19.1684	CAL0000150		CAL0000150	3	W	11	7	52	52	873	32	54	515	1683	1745	-0.758937	0.553579	0.758937	1.37096	0	-0.754888	-0.754888	1
4149	orf19.3730	CAL0001163	ERG25	CAL0001163	R	C	6	3	457	373	2365	383	243	2466	408	473	0.364502	0.265944	0.364502	1.3706	0.293019	0.656388	0.36337	1
2673	orf19.4939	CAL0006288		CAL0006288	1	C	21	12	403	402	5011	159	120	3325	4905	4905	0.403104	0.294243	0.403104	1.36997	0.00358434	0.405992	0.402408	1
3232	orf19.5207	CAL0003487		CAL0003487	2	W	1	1	64	64	3832	32	15	4488	1281	1300	1.14783	0.839192	1.14783	1.36778	0	1.09311	1.09311	1
715	orf19.2789	CAL0004293		CAL0004293	1	W	4	4	45	54	685	54	38	889	960	965	0.790256	0.578611	0.790256	1.36578	-0.263034	0.50696	0.769994	1
4472	orf19.4548	CAL0002767	FGR38	CAL0002767	1	W	16	9	155	117	790	176	175	951	1131	1155	-0.399925	0.293262	0.399925	1.36371	0.40576	0.00822051	-0.397539	1
3353	orf19.3328	CAL0004100		CAL0004100	1	C	3	3	37	24	1007	43	49	2857	1824	1837	-0.848504	0.622226	0.848504	1.36366	0.624491	-0.188445	-0.812936	1
5711	orf19.1083	CAL0001251		CAL0001251	6	C	4	3	186	168	1881	333	390	3153	684	703	-0.353093	0.258934	0.353093	1.36364	0.146841	-0.227952	-0.374793	1
1184	orf19.3867	CAL0002123		CAL0002123	R	W	1	1	154	123	9947	343	344	29863	888	953	-0.317727	0.233028	0.317727	1.36347	0.324272	-0.00419999	-0.328472	1
1712	orf19.3347	CAL0004143		CAL0004143	1	C	2	2	108	127	3101	217	191	4558	522	549	0.422898	0.310512	0.422898	1.36194	-0.233797	0.184122	0.41792	1
4584	orf19.3798	CAL0001314		CAL0001314	4	C	7	5	453	443	4047	1373	1544	10265	978	1027	-0.199502	0.146776	0.199502	1.35923	0.0322044	-0.169341	-0.201545	1
2601	orf19.5389	CAL0004415	LAP3	CAL0004415	3	C	-1	1	10	5	1748	38	25	7205	141	142	-0.758782	0.558881	0.758782	1.35768	1	0.604071	-0.395929	1
4265	orf19.2110	CAL0005273		CAL0005273	2	W	5	4	76	96	1221	33	25	1271	1389	1399	0.785631	0.578809	0.785631	1.35732	-0.337035	0.400538	0.737573	1
4232	orf19.2471	CAL0001602	GIM5	CAL0001602	1	W	2	1	99	145	3692	351	393	8821	477	533	0.415895	0.306703	0.415895	1.35602	-0.550552	-0.163058	0.387494	1
3252	orf19.4194	CAL0005890		CAL0005890	6	C	8	7	127	138	1448	179	149	1489	1092	1101	0.388673	0.286633	0.388673	1.356	-0.11984	0.264647	0.384487	1
4693	orf19.4105	CAL0005556		CAL0005556	2	W	1	1	18	18	987	16	32	2407	951	965	-0.931887	0.687388	0.931887	1.35569	0	-1	-1	1
3734	orf19.6928	CAL0000212	SOL1	CAL0000212	3	C	9	9	322	305	3581	643	719	10194	1635	1717	-0.241571	0.178635	0.241571	1.35232	0.0782514	-0.161173	-0.239424	1
2967	orf19.443	CAL0005692		CAL0005692	1	W	1	2	127	171	3678	74	62	2865	588	721	0.745212	0.551508	0.745212	1.35123	-0.429168	0.255257	0.684425	1
5535	orf19.1948	CAL0002588		CAL0002588	5	W	10	6	94	92	870	473	365	4279	1302	1321	0.344155	0.254763	0.344155	1.35088	0.0310269	0.373944	0.342917	1
4280	orf19.3100	CAL0002211		CAL0002211	4	C	25	17	180	184	1791	327	269	2818	3117	3126	0.312519	0.231346	0.312519	1.35087	-0.0317089	0.281684	0.313393	1
4820	orf19.2917	CAL0005973		CAL0005973	4	C	8	8	1039	778	9594	2382	2043	38360	1581	1629	-0.193414	0.143192	0.193414	1.35073	0.417354	0.221484	-0.195869	1
3360	orf19.3477	CAL0005064	NIP7	CAL0005064	6	C	-1	9	360	250	4656	804	672	12414	27	28	-0.2672	0.197839	0.2672	1.35059	0.526069	0.258734	-0.267335	1
1629	orf19.1422	CAL0004518	FZO1	CAL0004518	4	C	9	3	129	126	4664	182	123	8472	2625	2727	0.531446	0.394058	0.531446	1.34865	0.0339473	0.56528	0.531333	1
1818	orf19.2890	CAL0005241		CAL0005241	4	C	4	4	79	78	1811	55	83	1534	1230	1239	-0.603074	0.448044	0.603074	1.34602	0.0183785	-0.59368	-0.612058	1
4629	orf19.3872	CAL0002150	ARC40	CAL0002150	R	W	10	7	894	730	4206	471	453	4016	789	1003	-0.236148	0.175445	0.236148	1.34599	0.292378	0.056216	-0.236162	1
2948	orf19.4185	CAL0005856	PCT1	CAL0005856	4	W	4	2	98	95	878	104	71	1186	456	468	0.523184	0.388811	0.523184	1.3456	0.0448542	0.550693	0.505838	1
3563	orf19.4818	CAL0005320		CAL0005320	1	W	7	4	33	28	781	104	143	2336	1584	1598	-0.70446	0.524086	0.70446	1.34417	0.237039	-0.459432	-0.696471	1
344	orf19.5527	CAL0006120	NAB3	CAL0006120	6	W	14	6	67	75	885	127	195	1348	1494	1516	-0.467398	0.34775	0.467398	1.34406	-0.16273	-0.618646	-0.455916	1
2603	orf19.2544	CAL0002463		CAL0002463	R	W	2	2	96	78	1697	66	83	4001	597	614	-0.654292	0.486883	0.654292	1.34384	0.29956	-0.330645	-0.630206	1
5643	orf19.400	CAL0005535	GRF10	CAL0005535	1	C	3	4	684	768	10139	1447	1358	24527	738	861	0.258877	0.193097	0.258877	1.34066	-0.16711	0.0915814	0.258691	1
3733	orf19.1799	CAL0001002	GAP5	CAL0001002	4	C	21	13	909	1125	5983	865	934	6965	1857	1902	0.197221	0.147178	0.197221	1.34002	-0.307573	-0.110722	0.19685	1
5138	orf19.6316	CAL0001263		CAL0001263	R	C	3	3	11	24	959	11	8	604	1686	1695	1.59236	1.18914	1.59236	1.33908	-1.12553	0.459432	1.58496	1
3979	orf19.2020	CAL0004351	HGT6	CAL0004351	2	W	7	6	535	519	6356	2548	1657	16638	1653	1692	0.586316	0.437979	0.586316	1.33869	0.0438044	0.620792	0.576987	1
3571	orf19.2137	CAL0005328		CAL0005328	6	C	8	5	67	49	654	14	23	412	1452	1460	-1.21251	0.905791	1.21251	1.33862	0.451379	-0.716207	-1.16759	1
5578	orf19.3874	CAL0002152	ZCF19	CAL0002152	R	W	11	11	139	176	1548	217	219	3033	1851	1865	0.330728	0.247078	0.330728	1.33856	-0.340491	-0.0132358	0.327255	1
5652	orf19.5136	CAL0002553		CAL0002553	7	C	2	2	70	94	2290	210	199	3613	687	838	0.481182	0.359724	0.481182	1.33764	-0.425306	0.0776209	0.502927	1
4323	orf19.747	CAL0001838	PHO81	CAL0001838	4	C	6	4	53	53	740	79	115	1608	1221	1230	-0.549636	0.41125	0.549636	1.3365	0	-0.541709	-0.541709	1
5591	orf19.5118	CAL0002512		CAL0002512	1	W	11	7	206	150	2859	735	667	10456	1887	1962	-0.311813	0.233457	0.311813	1.33563	0.457682	0.140057	-0.317624	1
5585	orf19.2410	CAL0001468	SYS3	CAL0001468	R	W	16	14	256	245	2864	304	355	3731	2688	2749	-0.288987	0.216603	0.288987	1.33418	0.0633621	-0.223748	-0.28711	1
1959	orf19.3797	CAL0001313		CAL0001313	4	C	4	5	910	922	8273	1036	903	11091	777	887	0.212513	0.159289	0.212513	1.33413	-0.0189002	0.198226	0.217126	1
2872	orf19.1668	CAL0000074		CAL0000074	3	C	4	4	58	71	1195	81	65	2172	1872	1880	0.609017	0.456641	0.609017	1.33369	-0.291766	0.317482	0.609248	1
3738	orf19.3356	CAL0004160		CAL0004160	1	C	46	26	353	355	2925	180	229	1538	4797	4800	-0.338948	0.254308	0.338948	1.33282	-0.00815084	-0.347351	-0.3392	1
2541	orf19.2967	CAL0006083	TIF34	CAL0006083	1	W	1	1	134	161	14554	565	455	61665	1053	1187	0.46689	0.350458	0.46689	1.33223	-0.264828	0.312384	0.577212	1
3666	orf19.4062	CAL0004873	GPT1	CAL0004873	1	W	2	2	49	55	2039	111	87	4554	1116	1145	0.526732	0.395922	0.526732	1.33039	-0.16665	0.351472	0.518122	1
1088	orf19.1304	CAL0003704		CAL0003704	4	W	3	3	154	134	3454	373	404	8875	915	995	-0.332511	0.250066	0.332511	1.32969	0.200697	-0.11518	-0.315877	1
5734	orf19.1525	CAL0005441		CAL0005441	2	W	8	7	203	251	2322	213	210	3613	1197	1302	0.32465	0.244276	0.32465	1.32903	-0.306208	0.0204641	0.326672	1
2955	orf19.190	CAL0003266		CAL0003266	2	W	-1	6	84	83	1036	25	42	929	1086	1061	-0.76704	0.577347	0.76704	1.32856	0.017278	-0.748461	-0.765739	1
5194	orf19.2060	CAL0004456	SOD5	CAL0004456	2	C	2	1	27	57	1316	30	95	1666	687	714	-0.594944	0.448181	0.594944	1.32746	-1.078	-1.66297	-0.584963	1
2708	orf19.5575	CAL0006238		CAL0006238	6	C	15	9	156	166	1458	293	389	2081	1623	1633	-0.331198	0.249607	0.331198	1.32688	-0.0896372	-0.408869	-0.319232	1
3876	orf19.2848	CAL0005141		CAL0005141	R	W	13	10	46	36	603	60	73	845	2286	2410	-0.690837	0.521063	0.690837	1.32582	0.353637	-0.282934	-0.636571	1
1289	orf19.5551	CAL0006177		CAL0006177	6	C	10	8	102	142	1607	318	353	3850	1563	1577	0.331338	0.250041	0.331338	1.32513	-0.477322	-0.150641	0.32668	1
3327	orf19.4705	CAL0004347		CAL0004347	4	W	11	5	201	275	3897	141	151	3618	1596	1662	0.351119	0.265219	0.351119	1.32388	-0.452236	-0.0988534	0.353383	1
3289	orf19.3438	CAL0004972		CAL0004972	6	C	2	2	93	105	2883	110	88	6812	1155	1195	0.510018	0.385897	0.510018	1.32164	-0.175087	0.321928	0.497015	1
636	orf19.1372	CAL0003908		CAL0003908	2	C	1	1	203	17	8925	320	51	10384	720	818	-0.961109	0.728375	0.961109	1.31952	3.57787	2.6495	-0.92837	1
4321	orf19.2437	CAL0001527	ARC35	CAL0001527	1	C	4	2	253	294	5899	565	542	9035	1041	1058	0.262213	0.198868	0.262213	1.31853	-0.216679	0.059958	0.276637	1
1567	orf19.5229	CAL0003527	MRPS9	CAL0003527	1	W	23	15	518	586	6854	1837	1852	20862	3015	3034	0.165018	0.125185	0.165018	1.31819	-0.177949	-0.0117325	0.166216	1
2403	orf19.2350	CAL0000747		CAL0000747	1	C	5	4	23	27	534	36	70	768	1563	1575	-0.73809	0.560128	0.73809	1.31772	-0.231326	-0.959358	-0.728032	1
736	orf19.6031	CAL0005098	TUB2	CAL0005098	1	C	7	6	88	119	1699	215	222	6057	2526	2538	0.39719	0.301578	0.39719	1.31704	-0.435386	-0.046223	0.389163	1
3484	orf19.3185	CAL0002422		CAL0002422	5	W	23	14	1963	1505	14270	1501	1291	13236	2352	2369	-0.161182	0.122444	0.161182	1.31637	0.383297	0.217435	-0.165862	1
3963	orf19.685.1	CAL0120930		CAL0120930	6	W	4	3	123	69	286	45	40	204	234	269	-0.652595	0.495877	0.652595	1.31604	0.83399	0.169925	-0.664065	1
1894	orf19.3301	CAL0004039		CAL0004039	1	W	2	2	50	27	1888	24	27	2465	2208	2237	-0.999693	0.759879	0.999693	1.31559	0.888969	-0.169925	-1.05889	1
2186	orf19.430	CAL0005648		CAL0005648	1	W	2	2	12	18	332	25	19	740	660	674	0.991819	0.754042	0.991819	1.31534	-0.584963	0.395929	0.980891	1
1950	orf19.2352	CAL0000750		CAL0000750	1	W	5	4	190	203	2923	597	501	4663	975	990	0.360732	0.274398	0.360732	1.31463	-0.0954803	0.25292	0.348401	1
2022	orf19.3409	CAL0004877		CAL0004877	6	W	28	18	585	687	4371	1016	1338	9370	2526	2546	-0.16414	0.124874	0.16414	1.31444	-0.231873	-0.397178	-0.165304	1
4486	orf19.1495	CAL0004780		CAL0004780	2	C	7	5	301	249	2179	978	982	4282	798	815	-0.272906	0.207678	0.272906	1.31408	0.273618	-0.00588856	-0.279506	1
4771	orf19.2288	CAL0006383	CCT5	CAL0006383	2	W	7	8	1632	1685	20656	2546	2919	33911	1647	1734	-0.148878	0.113296	0.148878	1.31406	-0.0461075	-0.197242	-0.151134	1
5564	orf19.2871	CAL0005198	SDH12	CAL0005198	4	C	3	3	740	729	34271	3460	2656	105752	1926	2178	0.343614	0.261537	0.343614	1.31383	0.0216065	0.381517	0.35991	1
421	orf19.4007	CAL0004649	CNB1	CAL0004649	5	C	8	8	108	76	913	136	63	1098	1302	1309	0.604012	0.460185	0.604012	1.31254	0.50696	1.11018	0.603223	1
3602	orf19.120	CAL0003025		CAL0003025	6	W	10	3	65	74	370	46	28	232	774	787	0.883825	0.673669	0.883825	1.31196	-0.187086	0.716207	0.903293	1
2075	orf19.1275	CAL0003020	GAT1	CAL0003020	4	W	4	4	9	16	697	5	26	806	2067	2269	-1.62284	1.23701	1.62284	1.3119	-0.830075	-2.37851	-1.54844	1
4961	orf19.5569	CAL0006219		CAL0006219	6	W	28	14	649	558	6567	1339	1295	10944	2799	2800	-0.170479	0.130076	0.170479	1.31061	0.217953	0.0482039	-0.169749	1
2018	orf19.771	CAL0001933		CAL0001933	1	W	13	9	239	145	1063	311	150	1847	1047	1057	0.337809	0.257793	0.337809	1.31039	0.720958	1.05195	0.330994	1
3598	orf19.6155	CAL0006047	CSE4	CAL0006047	3	C	14	9	276	207	4040	525	472	5705	2313	2340	-0.269334	0.205561	0.269334	1.31024	0.415037	0.153531	-0.261507	1
859	orf19.1564	CAL0005564		CAL0005564	2	W	1	2	283	227	9828	250	251	8352	570	758	-0.332395	0.253702	0.332395	1.31018	0.31811	-0.00575927	-0.323869	1
743	orf19.399	CAL0004967		CAL0004967	1	C	4	4	46	71	3295	153	167	9574	2139	2230	0.487986	0.37251	0.487986	1.30999	-0.626185	-0.126316	0.499869	1
1074	orf19.2664	CAL0003493		CAL0003493	4	W	4	4	246	262	5878	95	140	7496	2700	2715	-0.452985	0.346004	0.452985	1.30919	-0.0909085	-0.559427	-0.468519	1
1628	orf19.4715	CAL0004372	GDH3	CAL0004372	4	W	45	36	346	355	6922	982	882	17158	11481	11558	0.190983	0.145887	0.190983	1.30912	-0.037047	0.154944	0.191991	1
3586	orf19.738	CAL0001808	CAM1	CAL0001808	4	C	33	19	521	506	4035	1186	1015	10149	3951	3959	0.182314	0.139291	0.182314	1.30887	0.042146	0.224624	0.182478	1
1122	orf19.4166	CAL0005785		CAL0005785	4	W	6	6	22	22	662	90	146	2522	1890	1915	-0.705697	0.539513	0.705697	1.30803	0	-0.697971	-0.697971	1
1914	orf19.3474	CAL0005060		CAL0005060	6	C	6	6	55	75	1047	107	100	1600	1593	1605	0.569872	0.436393	0.569872	1.30587	-0.447459	0.0976108	0.54507	1
4518	orf19.1782	CAL0000962		CAL0000962	2	C	4	3	502	699	8924	411	440	11863	720	844	0.362993	0.27839	0.362993	1.3039	-0.477605	-0.0983651	0.37924	1
4496	orf19.3888	CAL0002184		CAL0002184	R	C	2	2	859	868	65026	4529	4056	158533	1653	1862	0.170144	0.130505	0.170144	1.30374	-0.0150369	0.159135	0.174172	1
3984	orf19.2079	CAL0004502	PHHB	CAL0004502	2	C	1	1	101	100	1577	228	176	2618	345	391	0.372379	0.285975	0.372379	1.30214	0.0143553	0.373458	0.359103	1
548	orf19.1336	CAL0003796	PUP3	CAL0003796	7	C	3	5	1234	909	10728	1506	1263	17183	621	764	-0.187377	0.143908	0.187377	1.30206	0.44099	0.253867	-0.187123	1
3551	orf19.5171	CAL0002654	LIP9	CAL0002654	7	C	1	1	72	82	14571	177	150	26088	2634	2683	0.431131	0.331279	0.431131	1.30141	-0.187627	0.238787	0.426414	1
6055	orf19.433	CAL0005654		CAL0005654	1	C	6	6	61	56	1076	76	113	1128	1743	1749	-0.694777	0.534056	0.694777	1.30094	0.123382	-0.572251	-0.695634	1
3930	orf19.1002	CAL0001015		CAL0001015	1	C	5	5	19	43	803	32	38	972	1893	1907	0.964552	0.74152	0.964552	1.30078	-1.17834	-0.247928	0.93041	1
2760	orf19.4555	CAL0002789		CAL0002789	6	C	16	10	13	41	708	11	15	776	6303	6303	1.2767	0.982008	1.2767	1.3001	-1.65711	-0.447459	1.20965	1
1217	orf19.371	CAL0004883	YHB5	CAL0004883	4	W	17	10	288	258	1318	308	334	1952	849	870	-0.2816	0.216729	0.2816	1.29932	0.158698	-0.116918	-0.275615	1
4539	orf19.4634	CAL0003670	NIP1	CAL0003670	4	W	5	5	126	113	1836	203	136	3508	1188	1203	0.427829	0.330116	0.427829	1.296	0.157101	0.577873	0.420772	1
2282	orf19.2119	CAL0005285	NDT80	CAL0005285	2	W	7	6	282	292	4334	1154	980	26307	1515	2038	0.286269	0.220888	0.286269	1.29599	-0.0502732	0.23579	0.286063	1
1508	orf19.1191	CAL0002157		CAL0002157	6	W	9	6	124	131	2459	198	161	4170	2421	2433	0.373396	0.289084	0.373396	1.29165	-0.0792267	0.29844	0.377666	1
1901	orf19.4550	CAL0002781	CTN1	CAL0002781	1	W	21	15	156	189	1253	129	200	1328	1902	1916	-0.354474	0.274756	0.354474	1.29014	-0.27684	-0.632629	-0.355789	1
5616	orf19.1648	CAL0000021	RAD50	CAL0000021	3	W	23	16	197	220	2614	208	184	3354	3999	3999	0.330452	0.256306	0.330452	1.28929	-0.159308	0.176878	0.336186	1
663	orf19.366	CAL0004862		CAL0004862	4	C	11	7	103	133	937	74	68	447	1011	1011	0.502802	0.390115	0.502802	1.28886	-0.368782	0.121991	0.490772	1
2031	orf19.5710	CAL0001372	SAP1	CAL0001372	6	W	54	34	324	416	1998	2301	2626	14160	3486	3548	0.168976	0.13131	0.168976	1.28685	-0.36059	-0.190606	0.169984	1
778	orf19.2462	CAL0001581	PRN3	CAL0001581	1	W	5	3	45	58	620	21	45	296	981	995	-0.748645	0.58184	0.748645	1.28669	-0.366128	-1.09954	-0.733408	1
861	orf19.4491	CAL0002030		CAL0002030	2	W	2	2	562	555	25474	825	695	34762	1056	1098	0.221396	0.172182	0.221396	1.28583	0.0180824	0.247381	0.229299	1
5156	orf19.516	CAL0000084		CAL0000084	R	C	3	4	128	108	2677	10	18	633	1686	1695	-1.16193	0.903699	1.16193	1.28575	0.245112	-0.847997	-1.09311	1
2088	orf19.300	CAL0004623	AIP2	CAL0004623	3	W	1	1	166	180	15026	129	99	31455	1584	1633	0.490827	0.382118	0.490827	1.28449	-0.116814	0.381871	0.498684	1
1480	orf19.1662	CAL0000068		CAL0000068	3	W	6	6	854	888	8069	1903	1655	14063	1056	1086	0.252016	0.19623	0.252016	1.28429	-0.0563236	0.201444	0.257768	1
1195	orf19.1082	CAL0001250		CAL0001250	6	W	6	5	105	57	562	159	125	1335	516	579	-0.537844	0.419366	0.537844	1.28252	0.881356	0.347099	-0.534257	1
1083	orf19.2459	CAL0001564		CAL0001564	1	W	4	3	22	30	942	19	10	1612	2919	2942	1.38088	1.07675	1.38088	1.28245	-0.447459	0.925999	1.37346	1
5770	orf19.4324	CAL0000955		CAL0000955	5	W	1	2	80	83	1361	173	134	2034	555	569	0.406159	0.316807	0.406159	1.28204	-0.0531113	0.368539	0.42165	1
2746	orf19.243	CAL0003979	OXR1	CAL0003979	3	C	14	10	239	153	1030	217	179	1253	1038	1066	-0.372283	0.290394	0.372283	1.28199	0.643479	0.277735	-0.365744	1
4503	orf19.2399	CAL0000844		CAL0000844	R	C	25	14	179	231	1342	269	281	2497	1749	1754	0.311827	0.243486	0.311827	1.28068	-0.367933	-0.062964	0.304969	1
1837	orf19.2274	CAL0006343		CAL0006343	2	W	6	5	18	13	151	20	31	284	747	784	-1.16616	0.911003	1.16616	1.28008	0.469485	-0.632268	-1.10175	1
375	orf19.1093	CAL0001280	FLO8	CAL0001280	6	C	13	14	209	197	2357	601	683	9682	2379	2519	-0.270972	0.211917	0.270972	1.27867	0.0853073	-0.184521	-0.269828	1
2943	orf19.4701	CAL0004342		CAL0004342	4	W	6	6	80	166	1624	207	329	2105	927	994	0.392588	0.307226	0.392588	1.27785	-1.05311	-0.668457	0.384655	1
1410	orf19.6476	CAL0002287	SEC1	CAL0002287	7	C	9	10	142	153	1612	67	50	1885	2403	2412	0.538498	0.421695	0.538498	1.27698	-0.107641	0.422233	0.529874	1
4824	orf19.3959	CAL0003016	EAF6	CAL0003016	5	C	21	13	454	386	8579	2374	2393	25730	3828	3880	-0.241249	0.188968	0.241249	1.27667	0.234091	-0.0115005	-0.245592	1
3902	orf19.3928	CAL0002911		CAL0002911	5	C	3	3	45	35	1177	193	103	4767	1143	1155	0.534055	0.418736	0.534055	1.2754	0.36257	0.905957	0.543386	1
6107	orf19.1383	CAL0003941		CAL0003941	2	C	25	14	164	236	1054	67	131	736	1944	1977	-0.446217	0.349948	0.446217	1.2751	-0.525091	-0.967334	-0.442243	1
390	orf19.3405	CAL0004869		CAL0004869	6	C	-1	2	9	10	726	9	24	533	1455	1456	-1.42488	1.11792	1.42488	1.27458	-0.152003	-1.41504	-1.26303	1
2404	orf19.2016	CAL0004337	ERG28	CAL0004337	2	C	1	1	92	52	2464	102	92	5565	417	464	-0.610833	0.479363	0.610833	1.27426	0.823122	0.148863	-0.674259	1
5572	orf19.3300	CAL0004036	ZPR1	CAL0004036	1	C	1	1	254	267	11972	330	267	44984	1530	1557	0.380518	0.298619	0.380518	1.27426	-0.0720112	0.305626	0.377638	1
5333	orf19.1283	CAL0003061	MEC1	CAL0003061	5	C	63	32	275	249	2603	68	45	978	6978	6978	0.467003	0.366601	0.467003	1.27387	0.143286	0.59561	0.452324	1
4204	orf19.1110	CAL0001872		CAL0001872	5	W	6	5	66	93	1089	115	114	1353	984	1009	0.500699	0.393297	0.500699	1.27308	-0.494765	0.0126	0.507365	1
2845	orf19.984	CAL0003811		CAL0003811	1	W	11	9	5	16	78	14	17	226	1509	1509	1.41322	1.11166	1.41322	1.27127	-1.67807	-0.280108	1.39796	1
310	orf19.2934	CAL0006015		CAL0006015	1	C	6	3	398	493	4358	769	800	13660	531	551	0.250616	0.197368	0.250616	1.26979	-0.308819	-0.0570164	0.251803	1
4084	orf19.4466	CAL0001917		CAL0001917	1	C	6	4	34	24	659	53	22	552	1545	1545	0.867936	0.683533	0.867936	1.26978	0.5025	1.26849	0.765988	1
4844	orf19.4630	CAL0003663	ERG251	CAL0003663	4	C	4	3	14	13	396	28	14	778	1293	1295	1.02305	0.80579	1.02305	1.26962	0.106915	1	0.893085	1
4873	orf19.4147	CAL0005719		CAL0005719	5	C	7	8	993	979	12073	1706	1902	33428	1551	1780	-0.183466	0.144584	0.183466	1.26892	0.0204849	-0.1569	-0.177384	1
3325	orf19.2191	CAL0005473		CAL0005473	2	W	1	1	24	27	1610	45	30	1834	1038	1059	0.766163	0.603911	0.766163	1.26867	-0.169925	0.584963	0.754888	1
1878	orf19.596.1	CAF0006902		CAF0006902	R	C	2	2	1343	1683	12419	5467	7708	33928	180	362	-0.170579	0.134541	0.170579	1.26786	-0.325576	-0.495607	-0.170031	1
4092	orf19.3041	CAL0001405		CAL0001405	1	W	6	6	83	81	1686	36	52	1268	1950	2059	-0.584266	0.461136	0.584266	1.26701	0.0351894	-0.530515	-0.565704	1
1329	orf19.1314	CAL0003728		CAL0003728	4	C	24	16	297	262	1136	362	263	1567	1410	1451	0.283463	0.224087	0.283463	1.26497	0.180896	0.460927	0.280031	1
4573	orf19.2326	CAL0000700		CAL0000700	1	C	9	7	167	167	1733	208	155	3054	1458	1484	0.411789	0.325629	0.411789	1.2646	0	0.424315	0.424315	1
4563	orf19.1069	CAL0001212	RPN4	CAL0001212	1	W	6	6	76	71	1302	400	480	8409	1611	1626	-0.36671	0.290072	0.36671	1.2642	0.0981804	-0.263034	-0.361215	1
3377	orf19.2915	CAL0005969		CAL0005969	4	C	9	5	140	116	2529	80	47	2759	2088	2096	0.489379	0.387143	0.489379	1.26408	0.271302	0.767339	0.496037	1
3697	orf19.660	CAL0001052	YKE2	CAL0001052	1	W	1	2	23	22	1516	11	21	1172	1947	1990	-0.987979	0.782486	0.987979	1.26262	0.0641303	-0.932886	-0.997016	1
3134	orf19.3591	CAL0006018	JEM1	CAL0006018	2	C	14	11	724	779	7808	1509	1438	10020	1653	1682	0.175346	0.138885	0.175346	1.26253	-0.105634	0.0695291	0.175163	1
1401	orf19.385	CAL0004920		CAL0004920	1	C	10	11	1380	1478	22194	2641	2601	63464	3000	3119	0.120782	0.095826	0.120782	1.26043	-0.098978	0.0220179	0.120996	1
168	orf19.3954	CAL0003011		CAL0003011	5	W	10	8	172	151	2729	75	90	3273	3213	3226	-0.448739	0.356061	0.448739	1.26029	0.18786	-0.263034	-0.450894	1
614	orf19.1119	CAL0001884	MTR10	CAL0001884	5	C	27	20	1046	1028	7530	1233	1343	10942	2880	2898	-0.148596	0.118386	0.148596	1.25518	0.0250426	-0.123287	-0.148329	1
6157	orf19.5579	CAL0006245	PEP3	CAL0006245	6	C	8	4	67	36	455	44	38	404	807	837	-0.688607	0.548977	0.688607	1.25435	0.896164	0.211504	-0.68466	1
2701	orf19.5804	CAL0002248		CAL0002248	2	C	4	4	20	21	2069	177	116	3866	3912	3921	0.68265	0.544264	0.68265	1.25426	-0.0703893	0.609625	0.680014	1
2581	orf19.1636	CAL0006408	STE50	CAL0006408	3	W	6	6	69	74	984	123	95	1251	1383	1397	0.480839	0.383383	0.480839	1.2542	-0.100929	0.372659	0.473588	1
5449	orf19.2289	CAL0006384	ARP3	CAL0006384	2	W	4	4	354	437	8835	591	629	14639	1260	1324	0.210683	0.168178	0.210683	1.25274	-0.303884	-0.0899019	0.213982	1
1935	orf19.2099	CAL0004571	HIR1	CAL0004571	2	C	-1	3	16	19	2553	24	51	1788	33	34	-0.894292	0.713994	0.894292	1.25252	-0.247928	-1.08746	-0.839535	1
145	orf19.6470	CAL0002274		CAL0002274	7	W	3	3	264	367	3054	512	613	7662	558	593	0.208066	0.166212	0.208066	1.25181	-0.475242	-0.259743	0.215499	1
794	orf19.6653	CAL0004060		CAL0004060	R	C	3	3	93	96	2734	167	132	3758	1647	1656	0.383899	0.306905	0.383899	1.25087	-0.0458037	0.33931	0.385114	1
2899	orf19.5224	CAL0003522		CAL0003522	1	C	-1	15	462	531	3471	492	492	5545	2844	3006	0.199034	0.15918	0.199034	1.25037	-0.200819	0	0.200819	1
3149	orf19.2173	CAL0005413	MAF1	CAL0005413	2	W	5	3	59	93	1550	139	166	1591	1143	1144	0.410847	0.329048	0.410847	1.24859	-0.656516	-0.256098	0.400417	1
4528	orf19.6140	CAL0006027		CAL0006027	R	W	6	5	31	32	313	46	75	624	861	893	-0.658134	0.527146	0.658134	1.24849	-0.0458037	-0.705257	-0.659453	1
4876	orf19.5483	CAL0005338		CAL0005338	2	C	9	6	107	143	2544	94	94	2606	1965	1965	0.417294	0.33425	0.417294	1.24845	-0.418404	0	0.418404	1
460	orf19.1708	CAL0000767		CAL0000767	3	W	2	1	127	90	2657	59	18	5358	660	685	1.12729	0.903705	1.12729	1.24741	0.496832	1.71272	1.21589	1
955	orf19.2673	CAL0003512		CAL0003512	4	W	6	6	128	122	1543	292	353	2963	1020	1039	-0.363064	0.291099	0.363064	1.24722	0.0692627	-0.2737	-0.342962	1
2921	orf19.6237	CAL0000480		CAL0000480	1	W	4	3	276	260	4952	446	511	7493	711	932	-0.282364	0.226519	0.282364	1.24654	0.0861566	-0.19628	-0.282436	1
1596	orf19.2582	CAL0002539		CAL0002539	R	W	14	11	370	527	6804	383	472	10866	3057	3093	0.20896	0.167741	0.20896	1.24573	-0.510278	-0.301442	0.208835	1
2237	orf19.6252	CAL0000512		CAL0000512	1	C	7	4	381	317	5669	1121	1094	16926	1203	1228	-0.22952	0.184367	0.22952	1.24491	0.265308	0.0351735	-0.230135	1
5644	orf19.5237	CAL0003542		CAL0003542	1	W	5	4	28	53	290	69	81	844	642	656	0.677168	0.544024	0.677168	1.24474	-0.920566	-0.231326	0.68924	1
877	orf19.3911	CAL0002855	GLN3	CAL0002855	5	C	8	9	3396	3511	37760	15468	17874	358462	1353	1634	-0.155672	0.12508	0.155672	1.24458	-0.0480455	-0.208576	-0.16053	1
3467	orf19.4430	CAL0001806	KSP1	CAL0001806	1	W	4	2	113	122	4282	112	86	5381	1641	1787	0.506939	0.40732	0.506939	1.24457	-0.110558	0.38109	0.491649	1
2695	orf19.1552	CAL0005525	CPR3	CAL0005525	2	C	1	4	1610	1486	16454	1922	1958	50243	576	706	-0.139526	0.112198	0.139526	1.24357	0.115627	-0.0267724	-0.142399	1
2312	orf19.1061	CAL0001203	HHT21	CAL0001203	1	W	0	1	805	682	36886	15	21	233154	411	539	-0.868737	0.698634	0.868737	1.24348	0.239217	-0.485427	-0.724644	1
3056	orf19.5619	CAL0000570		CAL0000570	6	W	11	10	66	81	985	113	185	1332	2118	2133	-0.419044	0.337013	0.419044	1.24341	-0.295456	-0.711202	-0.415747	1
5282	orf19.579	CAL0000317	PR26	CAL0000317	5	C	24	16	294	372	2660	369	397	2998	2367	2450	0.239143	0.192347	0.239143	1.24329	-0.339486	-0.105518	0.233968	1
2357	orf19.844	CAL0002751	PGA16	CAL0002751	2	C	11	9	119	150	2495	149	149	2254	2472	2603	0.343292	0.277456	0.343292	1.23728	-0.334001	0	0.334001	1
1002	orf19.1619	CAL0006346		CAL0006346	3	C	8	7	260	260	3366	150	120	4457	1761	1782	0.329778	0.267209	0.329778	1.23416	0	0.321928	0.321928	1
2346	orf19.2558	CAL0002483		CAL0002483	R	W	5	4	53	56	1668	133	105	1908	1449	1463	0.427227	0.346326	0.427227	1.2336	-0.0794345	0.341037	0.420471	1
3967	orf19.48	CAL0000580		CAL0000580	1	C	26	23	423	277	3511	367	287	3657	4188	4292	-0.260147	0.211238	0.260147	1.23154	0.610772	0.354729	-0.256042	1
3900	orf19.281	CAL0004081		CAL0004081	3	W	5	5	27	23	409	18	8	384	1098	1112	1.00869	0.81968	1.00869	1.2306	0.231326	1.16993	0.938599	1
1203	orf19.3658	CAL0000424		CAL0000424	6	W	11	10	55	59	691	32	21	495	1944	1971	0.727048	0.590817	0.727048	1.23058	-0.101283	0.607683	0.708966	1
5014	orf19.789.1	CAF0007416	CAK1	CAF0007416	4	C	3	2	209	156	2023	449	238	6486	441	543	0.469873	0.381838	0.469873	1.23056	0.421957	0.915754	0.493797	1
1222	orf19.5535	CAL0006143		CAL0006143	6	C	11	5	99	100	984	21	12	283	1458	1458	0.814344	0.662226	0.814344	1.22971	-0.0144996	0.807355	0.821854	1
6202	orf19.3396	CAL0004225		CAL0004225	6	C	-1	2	421	274	8162	899	782	15973	12	13	-0.373914	0.304306	0.373914	1.22874	0.619644	0.201153	-0.418492	1
5261	orf19.1754	CAL0000870		CAL0000870	2	C	4	3	116	93	3276	349	376	7095	1434	1459	-0.422675	0.344033	0.422675	1.22859	0.318822	-0.107506	-0.426328	1
6142	orf19.4282	CAL0000350		CAL0000350	5	C	13	12	235	186	2895	546	506	5671	2658	2667	-0.228587	0.186073	0.228587	1.22848	0.337358	0.109764	-0.227595	1
1587	orf19.5243	CAL0003556	MCD4	CAL0003556	1	W	18	13	1080	1101	7883	2234	2623	16552	1563	1590	-0.20107	0.163919	0.20107	1.22664	-0.0277832	-0.231589	-0.203805	1
2637	orf19.2498	CAL0001663		CAL0001663	3	W	16	12	249	303	1873	482	504	3195	1686	1701	0.221543	0.18061	0.221543	1.22664	-0.283172	-0.0643906	0.218781	1
384	orf19.816	CAL0002647	HSP21	CAL0002647	2	C	40	6	101	117	1184	20	12	168	5307	5307	1.02715	0.839625	1.02715	1.22335	-0.212153	0.736966	0.949119	1
327	orf19.1852	CAL0001691		CAL0001691	R	W	1	1	34	29	1727	34	51	4513	525	526	-0.882348	0.721521	0.882348	1.2229	0.229482	-0.584963	-0.814444	1
5878	orf19.3871	CAL0002149		CAL0002149	R	C	10	5	91	107	407	244	361	1217	417	430	-0.331436	0.271601	0.331436	1.2203	-0.233672	-0.565118	-0.331445	1
5881	orf19.581	CAL0000328		CAL0000328	5	C	7	6	145	210	5545	1382	1631	28999	2097	2226	0.293932	0.240928	0.293932	1.22	-0.534336	-0.238999	0.295337	1
3746	orf19.2733	CAL0004212		CAL0004212	4	W	21	10	162	141	911	246	265	1391	1554	1567	-0.309525	0.253726	0.309525	1.21992	0.200299	-0.107334	-0.307633	1
3635	orf19.2633	CAL0003431	HGT14	CAL0003431	R	W	3	3	11	6	360	8	11	410	1779	1792	-1.45571	1.19331	1.45571	1.21989	0.874469	-0.459432	-1.3339	1
2994	orf19.1325	CAL0003759	ECM38	CAL0003759	4	C	12	8	29	28	263	23	39	380	1761	1761	-0.878893	0.720967	0.878893	1.21905	0.0506261	-0.76184	-0.812466	1
953	orf19.5045	CAL0001669	RAM1	CAL0001669	4	W	12	8	15	8	331	23	27	431	2268	2268	-1.18361	0.971595	1.18361	1.21821	0.906891	-0.231326	-1.13822	1
110	orf19.3291	CAL0003436	HMT1	CAL0003436	1	W	2	2	428	465	12006	393	333	30830	1020	1083	0.388402	0.319146	0.388402	1.217	-0.11962	0.239007	0.358627	1
725	orf19.3122	CAL0002260	ARR3	CAL0002260	4	W	13	3	44	64	335	28	24	205	1182	1195	0.754756	0.620481	0.754756	1.2164	-0.540568	0.222392	0.762961	1
5694	orf19.4950	CAL0006326		CAL0006326	1	C	2	2	34	48	2606	13	33	4014	2442	2442	-0.871486	0.716928	0.871486	1.21558	-0.4975	-1.34395	-0.846455	1
892	orf19.2743	CAL0004229		CAL0004229	4	C	33	13	19	62	85	16	90	110	1821	1821	-0.831752	0.684356	0.831752	1.21538	-1.70627	-2.49185	-0.785584	1
5362	orf19.1192	CAL0002159	DNA2	CAL0002159	6	C	23	15	92	89	1323	158	114	2245	4281	4306	0.428799	0.352894	0.428799	1.21509	0.0478285	0.470891	0.423062	1
2354	orf19.3600	CAL0000269		CAL0000269	2	W	10	5	36	43	234	7	19	102	702	715	-1.28802	1.06039	1.28802	1.21467	-0.25634	-1.44057	-1.18423	1
5423	orf19.1333	CAL0003790	SNG3	CAL0003790	7	C	10	8	96	149	1374	162	197	2110	1830	1847	0.351496	0.289478	0.351496	1.21424	-0.634206	-0.282202	0.352004	1
462	orf19.6250	CAL0000511	ANT1	CAL0000511	1	W	4	5	1134	984	11140	830	841	19213	1044	1234	-0.228191	0.188067	0.228191	1.21335	0.20469	-0.0189945	-0.223685	1
1288	orf19.5129	CAL0002534		CAL0002534	7	C	1	1	12	11	568	27	10	709	687	698	1.25884	1.03827	1.25884	1.21243	0.125531	1.43296	1.30743	1
1330	orf19.1698	CAL0000192		CAL0000192	3	W	9	8	115	107	1205	100	125	1858	1899	2149	-0.421926	0.348044	0.421926	1.21228	0.104023	-0.321928	-0.425951	1
5606	orf19.5227	CAL0003525	RIB3	CAL0003525	1	W	6	4	115	122	871	381	522	2018	498	511	-0.368604	0.30411	0.368604	1.21207	-0.0852473	-0.454259	-0.369012	1
1314	orf19.3423	CAL0004924		CAL0004924	6	W	10	9	2320	1863	25407	9596	8253	119423	1368	1815	-0.099371	0.08206	0.099371	1.21096	0.316497	0.217515	-0.0989826	1
4877	orf19.6233	CAL0000476	NOP6	CAL0000476	1	W	20	11	376	412	2983	382	480	3520	1524	1524	-0.196687	0.162461	0.196687	1.21067	-0.131912	-0.329462	-0.19755	1
1284	orf19.2146	CAL0005349	HAT2	CAL0005349	6	C	2	2	73	88	2006	69	54	5434	1149	1162	0.647719	0.535372	0.647719	1.20985	-0.269607	0.353637	0.623244	1
1638	orf19.290	CAL0004102	KRE5	CAL0004102	3	C	16	13	189	154	3435	381	381	7687	4344	4368	-0.300101	0.248128	0.300101	1.20946	0.295456	0	-0.295456	1
3655	orf19.4657	CAL0003729		CAL0003729	4	W	9	8	174	147	1957	125	78	2111	1503	1539	0.440176	0.364118	0.440176	1.20888	0.243271	0.680382	0.437111	1
3686	orf19.4609	CAL0003595		CAL0003595	4	C	1	0	128	124	9400	869	988	24619	732	811	-0.228479	0.189183	0.228479	1.20771	0.0458037	-0.185155	-0.230959	1
5628	orf19.4448	CAL0001853	CCS1	CAL0001853	1	W	6	6	82	73	1822	95	115	3344	2466	2481	-0.444494	0.368187	0.444494	1.20725	0.167727	-0.275634	-0.443362	1
2980	orf19.231	CAL0003949	APL2	CAL0003949	3	W	15	10	601	505	5968	701	665	8274	2328	2351	-0.175925	0.145888	0.175925	1.20589	0.251082	0.0760601	-0.175021	1
2884	orf19.3806	CAL0001908	BAS1	CAL0001908	4	W	6	6	60	68	795	101	82	1660	1500	1512	0.496088	0.411495	0.496088	1.20557	-0.180572	0.300659	0.481232	1
5704	orf19.3426	CAL0004932		CAL0004932	6	W	3	1	8753	7475	143168	30197	30503	596613	477	478	-0.251249	0.208474	0.251249	1.20518	0.227704	-0.0145459	-0.24225	1
1597	orf19.1250	CAL0002944		CAL0002944	4	W	5	5	207	243	3253	399	379	6708	987	1034	0.292878	0.243284	0.292878	1.20385	-0.231326	0.0741909	0.305516	1
3323	orf19.2006.1	CAF0006932	COX17	CAF0006932	2	W	1	1	97	90	1184	186	132	3402	186	266	0.388198	0.322568	0.388198	1.20346	0.10806	0.494765	0.386705	1
1320	orf19.1815	CAL0001603		CAL0001603	R	W	2	3	763	760	11938	1158	984	43135	738	795	0.222249	0.184857	0.222249	1.20228	0.00568364	0.234905	0.229221	1
1028	orf19.4536	CAL0002727		CAL0002727	1	C	4	6	1630	1745	24864	1060	1296	64662	1491	1622	-0.198382	0.165083	0.198382	1.20171	-0.0983551	-0.290001	-0.191646	1
3910	orf19.2302	CAL0000642		CAL0000642	1	W	5	4	46	46	1070	24	13	755	1470	1483	0.933915	0.777256	0.933915	1.20155	0	0.884523	0.884523	1
1118	orf19.5580	CAL0006254		CAL0006254	6	W	64	40	222	209	2261	113	137	1252	8622	8635	-0.361665	0.301176	0.361665	1.20084	0.0870567	-0.277853	-0.36491	1
1761	orf19.4805	CAL0005291		CAL0005291	1	W	5	5	102	73	3090	138	74	4977	2601	2685	0.432982	0.361206	0.432982	1.19871	0.482601	0.899071	0.41647	1
2502	orf19.5053	CAL0001684		CAL0001684	1	C	11	6	40	70	375	90	109	493	783	804	0.540608	0.451015	0.540608	1.19865	-0.807355	-0.276331	0.531024	1
4376	orf19.2893	CAL0005248		CAL0005248	4	W	4	4	11	14	1147	41	27	1045	2538	2551	0.991787	0.828547	0.991787	1.19702	-0.347923	0.602665	0.950588	1
382	orf19.759	CAL0001871		CAL0001871	1	W	22	13	1455	1355	12180	2108	1785	26840	2811	2854	0.136698	0.114351	0.136698	1.19542	0.102726	0.239951	0.137224	1
1703	orf19.2684	CAL0003531		CAL0003531	4	W	21	17	576	558	4035	983	1079	7640	2436	2450	-0.17894	0.149712	0.17894	1.19523	0.0458037	-0.134432	-0.180235	1
3203	orf19.4128	CAL0005636		CAL0005636	2	W	7	4	28	46	748	14	12	563	1305	1310	0.988571	0.827277	0.988571	1.19497	-0.716207	0.222392	0.938599	1
5256	orf19.6193	CAL0006146		CAL0006146	1	W	7	6	113	132	3730	47	78	4889	3786	3799	-0.513895	0.430234	0.513895	1.19445	-0.224215	-0.730813	-0.506598	1
868	orf19.5051	CAL0001682		CAL0001682	1	C	2	2	9	5	755	9	12	1085	2271	2279	-1.32777	1.11173	1.32777	1.19433	0.847997	-0.415037	-1.26303	1
3555	orf19.1585	CAL0005643	ZRT2	CAL0005643	2	W	3	5	168	126	2632	116	116	4492	1113	1225	-0.425268	0.356571	0.425268	1.19266	0.415037	0	-0.415037	1
5624	orf19.3770	CAL0001267	CDL1	CAL0001267	4	C	13	9	50	59	376	28	52	290	1368	1376	-0.69211	0.581018	0.69211	1.1912	-0.238787	-0.893085	-0.654298	1
1162	orf19.5112	CAL0002508	ADH2	CAL0002508	1	W	7	8	1508	1664	31902	6746	6755	187414	2034	2131	0.144148	0.121048	0.144148	1.19083	-0.142019	-0.00192345	0.140096	1
2286	orf19.6244	CAL0000496		CAL0000496	1	W	16	9	192	226	1681	256	250	2538	2322	2335	0.265345	0.222824	0.265345	1.19083	-0.235216	0.0342157	0.269432	1
1671	orf19.1493	CAL0004778	RAD7	CAL0004778	2	C	6	7	145	168	2620	142	207	3915	1959	1970	-0.329315	0.276718	0.329315	1.19007	-0.212408	-0.54374	-0.331332	1
5958	orf19.1483	CAL0004735		CAL0004735	2	C	1	1	82	82	2020	299	234	8303	396	433	0.348899	0.293266	0.348899	1.1897	0	0.353637	0.353637	1
5561	orf19.2209	CAL0006175	YVC1	CAL0006175	2	W	8	7	348	302	5741	324	330	8204	2028	2091	-0.22568	0.189914	0.22568	1.18833	0.204539	-0.0264722	-0.231011	1
3636	orf19.5576	CAL0006241	GUT1	CAL0006241	6	C	7	5	231	165	4317	759	645	5733	1665	1677	-0.248569	0.209338	0.248569	1.18741	0.485427	0.234801	-0.250626	1
2253	orf19.5612	CAL0000558		CAL0000558	6	W	-1	12	349	386	4201	147	196	2708	2346	2397	-0.268454	0.226091	0.268454	1.18737	-0.145374	-0.415037	-0.269664	1
4658	orf19.5779	CAL0001524		CAL0001524	2	C	2	2	110	150	16880	1247	1340	40027	2565	2738	0.366292	0.308601	0.366292	1.18694	-0.447459	-0.103772	0.343687	1
964	orf19.2364	CAL0000766	MIS11	CAL0000766	R	W	5	5	652	649	37346	4613	5139	155793	2841	3145	-0.163773	0.138111	0.163773	1.18581	0.00665349	-0.155782	-0.162436	1
3915	orf19.4442	CAL0001841	YPD1	CAL0001841	1	C	2	2	32	31	2030	24	13	1660	1683	1707	0.909741	0.769368	0.909741	1.18245	0.0458037	0.884523	0.838719	1
4171	orf19.6146	CAL0006031	ARC15	CAL0006031	R	C	1	1	42	205	12049	14	36	3103	756	818	0.876797	0.741523	0.876797	1.18243	-2.28716	-1.36257	0.924593	1
4521	orf19.4273	CAL0000318	PUT1	CAL0000318	5	C	4	4	97	93	6168	323	238	6448	2763	2772	0.363994	0.30786	0.363994	1.18234	0.060754	0.440573	0.379819	1
6195	orf19.216	CAL0003897		CAL0003897	2	C	13	9	120	126	1334	123	167	1254	1527	1547	-0.367691	0.311405	0.367691	1.18075	-0.0703893	-0.44119	-0.3708	1
1484	orf19.2370	CAL0000778	DSL1	CAL0000778	R	W	18	14	171	225	1822	169	160	1775	2043	2057	0.444623	0.376967	0.444623	1.17947	-0.395929	0.0789513	0.47488	1
891	orf19.4456	CAL0001876	BNI4	CAL0001876	1	W	3	3	419	283	16503	337	272	37269	1824	2142	-0.247371	0.21015	0.247371	1.17712	0.566148	0.309142	-0.257006	1
5121	orf19.3080	CAL0001496		CAL0001496	4	C	28	17	49	70	504	155	165	1473	3141	3641	0.425299	0.361736	0.425299	1.17572	-0.514573	-0.0901978	0.424375	1
2717	orf19.3628	CAL0000356	DSE1	CAL0000356	2	W	9	8	470	511	8211	858	814	19109	2499	2513	0.201535	0.171794	0.201535	1.17312	-0.120663	0.0759489	0.196611	1
5818	orf19.3003	CAL0001326		CAL0001326	1	W	12	9	347	341	8560	631	530	15055	4254	4255	0.22241	0.18959	0.22241	1.17311	0.0251639	0.251648	0.226484	1
5131	orf19.4112	CAL0005587	FAA2-1	CAL0005587	2	C	6	7	464	515	4032	197	184	2846	918	1011	0.251931	0.214764	0.251931	1.17306	-0.150448	0.0984899	0.248937	1
1623	orf19.4060	CAL0004867		CAL0004867	1	C	11	8	3142	3579	30506	10111	12784	90085	1113	1263	-0.145923	0.1244	0.145923	1.17301	-0.187873	-0.338414	-0.15054	1
2979	orf19.3365	CAL0004175	CSH3	CAL0004175	4	C	5	5	95	84	1707	87	102	1540	1158	1161	-0.399235	0.340741	0.399235	1.17167	0.177538	-0.229482	-0.40702	1
1411	orf19.2742	CAL0004228		CAL0004228	4	W	8	2	170	84	635	505	311	1540	339	339	-0.320005	0.273348	0.320005	1.17069	1.01707	0.699369	-0.317705	1
2800	orf19.6632	CAL0004005		CAL0004005	R	C	3	3	96	123	7234	414	422	21353	2376	2408	0.33623	0.287426	0.33623	1.1698	-0.357552	-0.0276122	0.32994	1
177	orf19.506	CAL0000049	ADE5,7	CAL0000049	R	W	1	1	512	470	28900	1543	1991	127221	1182	1386	-0.503404	0.430347	0.503404	1.16976	0.123483	-0.367755	-0.491238	1
5855	orf19.863	CAL0002812		CAL0002812	2	C	5	5	462	533	7281	823	1103	25084	1137	1172	-0.216016	0.184782	0.216016	1.16903	-0.206243	-0.422468	-0.216226	1
3926	orf19.1776	CAL0000933		CAL0000933	2	C	5	5	122	70	1346	135	107	1904	969	975	-0.451391	0.386359	0.451391	1.16832	0.801454	0.335349	-0.466106	1
2957	orf19.1549	CAL0005512		CAL0005512	2	W	4	2	892	913	22872	2740	2405	35816	747	1003	0.225236	0.19289	0.225236	1.16769	-0.0335712	0.188139	0.22171	1
3359	orf19.2707.1	CAF0006962	QCR9		4	C	0	1	1225	818	17075	11	13	35136	198	405	-0.872093	0.74743	0.872093	1.16679	0.582609	-0.241008	-0.823617	1
684	orf19.3960	CAL0003049	HAS1	CAL0003049	5	C	1	1	29	14	2696	154	118	4018	1425	1468	-0.70409	0.603447	0.70409	1.16678	1.05063	0.384143	-0.666483	1
4442	orf19.178	CAL0003223		CAL0003223	R	W	4	3	77	66	1151	226	268	2062	966	1020	-0.48728	0.417729	0.48728	1.1665	0.222392	-0.24591	-0.468303	1
1952	orf19.3222	CAL0003250		CAL0003250	R	C	9	7	94	139	4632	142	164	4244	2997	3016	0.359005	0.308224	0.359005	1.16475	-0.564352	-0.207805	0.356547	1
4957	orf19.3136	CAL0002294		CAL0002294	4	C	3	1	20	29	1635	211	223	7474	1377	1386	0.474638	0.407991	0.474638	1.16335	-0.536053	-0.0798007	0.456252	1
2161	orf19.1182	CAL0002128		CAL0002128	6	C	7	4	90	73	707	258	266	1781	894	904	-0.346532	0.298639	0.346532	1.16037	0.302029	-0.0440552	-0.346084	1
900	orf19.3848	CAL0002068	GCV2	CAL0002068	R	W	11	7	63	61	724	77	50	696	1293	1307	0.579444	0.4996	0.579444	1.15982	0.0465426	0.62293	0.576388	1
187	orf19.2386	CAL0000815		CAL0000815	R	W	1	1	60	83	2801	149	144	9193	744	758	0.553067	0.477013	0.553067	1.15944	-0.468149	0.0492435	0.517392	1
2317	orf19.86	CAL0000683		CAL0000683	6	W	2	3	229	251	3201	410	535	9351	486	516	-0.259352	0.22376	0.259352	1.15906	-0.13234	-0.383915	-0.251575	1
485	orf19.3206	CAL0003198	CCT7	CAL0003198	5	C	5	6	1043	997	20748	2161	2571	31795	1650	1720	-0.305439	0.264104	0.305439	1.15651	0.0650737	-0.250631	-0.315704	1
3818	orf19.30	CAL0000546	SPF1	CAL0000546	2	C	4	3	160	166	16805	305	248	25350	3672	3684	0.353265	0.30565	0.353265	1.15578	-0.0531113	0.298469	0.35158	1
4692	orf19.6938	CAL0000248	ORC3	CAL0000248	3	W	4	3	335	232	6507	507	428	16557	1035	1042	-0.278906	0.241852	0.278906	1.15321	0.530036	0.244375	-0.285661	1
6137	orf19.5765	CAL0001492		CAL0001492	6	W	29	17	984	793	6422	944	841	7418	2397	2411	-0.144569	0.125391	0.144569	1.15295	0.311337	0.166681	-0.144656	1
729	orf19.5052	CAL0001683		CAL0001683	1	W	6	4	78	61	1089	49	53	2238	1161	1175	-0.478949	0.415437	0.478949	1.15288	0.354665	-0.113211	-0.467875	1
4185	orf19.4312	CAL0000920		CAL0000920	5	W	6	6	115	123	2758	146	117	3226	2313	2326	0.412642	0.358317	0.412642	1.15161	-0.0970245	0.31946	0.416484	1
3856	orf19.3231	CAL0003279	CDC27	CAL0003279	R	C	4	3	12	14	1541	55	34	1381	2628	2677	0.923669	0.802129	0.923669	1.15152	-0.222392	0.693897	0.916289	1
4011	orf19.752	CAL0001862		CAL0001862	1	C	11	7	528	406	2851	444	406	4213	960	1151	-0.252009	0.219081	0.252009	1.1503	0.379058	0.12908	-0.249978	1
4267	orf19.4336	CAL0000989		CAL0000989	5	W	1	2	7082	6924	185863	5439	4625	645667	678	969	0.200707	0.17469	0.200707	1.14893	0.0325511	0.233888	0.201337	1
484	orf19.684	CAL0001134		CAL0001134	6	C	-1	2	68	76	2531	74	112	4280	1578	1597	-0.480796	0.41849	0.480796	1.14888	-0.160465	-0.597902	-0.437437	1
721	orf19.1054	CAL0001188		CAL0001188	1	C	6	8	487	510	4043	1492	1367	10249	810	1183	0.199134	0.173433	0.199134	1.14819	-0.0665755	0.126234	0.19281	1
4667	orf19.240	CAL0003975	PAM17	CAL0003975	3	W	2	6	981	1027	9303	1709	1410	24434	558	804	0.305929	0.26694	0.305929	1.14606	-0.0661111	0.277457	0.343568	1
2067	orf19.5805	CAL0002250		CAL0002250	2	C	5	5	108	83	2464	103	105	2366	1755	1768	-0.408648	0.356572	0.408648	1.14605	0.379848	-0.027745	-0.407593	1
3214	orf19.4488	CAL0002007		CAL0002007	2	W	20	18	857	782	9075	1297	1331	14912	2919	3062	-0.170255	0.148608	0.170255	1.14567	0.132127	-0.0373321	-0.169459	1
280	orf19.2786	CAL0004290		CAL0004290	1	C	23	17	234	246	2203	235	300	2601	3129	3155	-0.284858	0.248919	0.284858	1.14438	-0.0721498	-0.352302	-0.280152	1
5137	orf19.882	CAL0002893	PEX7	CAL0002893	2	C	8	7	188	188	2717	565	655	11796	2439	2468	-0.215361	0.188195	0.215361	1.14435	0	-0.213244	-0.213244	1
6058	orf19.5102	CAL0002487		CAL0002487	1	C	15	10	21	51	534	29	41	396	2265	2268	0.755173	0.66006	0.755173	1.1441	-1.28011	-0.499571	0.780537	1
4929	orf19.1685	CAL0000151	ZCF7	CAL0000151	3	W	7	7	36	26	328	85	94	1320	1350	1424	-0.62358	0.545066	0.62358	1.14404	0.469485	-0.145198	-0.614683	1
3204	orf19.1960	CAL0002632	CLN3	CAL0002632	5	C	8	6	139	112	1443	256	254	2741	1398	1398	-0.295916	0.258667	0.295916	1.144	0.311586	0.0113153	-0.300271	1
3145	orf19.864	CAL0002815	ADAEC	CAL0002815	2	C	23	18	314	322	2683	345	417	4106	3105	3128	-0.236355	0.206607	0.236355	1.14398	-0.0362961	-0.273451	-0.237155	1
335	orf19.81	CAL0000678		CAL0000678	2	W	4	5	234	172	6089	496	458	4979	810	1117	-0.332358	0.290685	0.332358	1.14336	0.4441	0.114993	-0.329107	1
6199	orf19.2249	CAL0006273		CAL0006273	2	C	3	3	189	175	2513	229	166	3792	717	733	0.357065	0.312414	0.357065	1.14292	0.111031	0.464164	0.353133	1
5802	orf19.5789	CAL0001546	SMP3	CAL0001546	2	C	3	4	483	547	5351	1442	1452	14191	669	694	0.176617	0.154788	0.176617	1.14103	-0.179518	-0.00997029	0.169547	1
3975	orf19.5085	CAL0001788	BUD6	CAL0001788	1	W	13	14	632	609	10939	1786	1896	31538	3276	3566	-0.136758	0.119875	0.136758	1.14084	0.0534823	-0.0862269	-0.139709	1
2285	orf19.836.1	CAF0006911	RPS9B	CAF0006911	2	C	-1	1	167	171	931	475	403	3059	18	19	0.252544	0.221405	0.252544	1.14064	-0.0341482	0.237148	0.271296	1
9	orf19.4899	CAL0005531	NAT5	CAL0005531	1	W	13	5	21	8	231	6	6	158	2841	2841	-1.43664	1.26002	1.43664	1.14017	1.39232	0	-1.39232	1
5075	orf19.386	CAL0004923	SIS1	CAL0004923	1	C	3	3	1309	1276	19880	775	873	11805	936	1122	-0.208052	0.182715	0.208052	1.13867	0.0368368	-0.171785	-0.208622	1
4193	orf19.4676	CAL0003791		CAL0003791	4	C	1	1	316	376	2674	201	179	6527	543	577	0.432241	0.379934	0.432241	1.13767	-0.250808	0.167236	0.418044	1
4532	orf19.2290	CAL0006402	TOR1	CAL0006402	2	W	14	12	130	110	5647	131	141	6050	7449	7463	-0.343093	0.301609	0.343093	1.13754	0.241008	-0.106128	-0.347136	1
4579	orf19.4686	CAL0003825	DAG7	CAL0003825	4	C	4	4	103	86	7536	103	65	6939	3603	3682	0.405762	0.356862	0.405762	1.13703	0.260236	0.664133	0.403897	1
571	orf19.5622	CAL0000583		CAL0000583	6	C	3	2	104	75	3444	149	82	6540	2055	2065	0.37551	0.330589	0.37551	1.13588	0.471621	0.861617	0.389995	1
2332	orf19.5209	CAL0003489		CAL0003489	2	C	4	4	87	81	3174	98	69	2432	2316	2353	0.436874	0.384647	0.436874	1.13578	0.103093	0.506185	0.403092	1
5368	orf19.263.1	CAF0007443		CAF0007443	3	W	1	1	153	157	2628	829	712	14874	213	214	0.236436	0.208188	0.236436	1.13569	-0.0372329	0.219495	0.256728	1
4039	orf19.5244	CAL0003557	BUL4	CAL0003557	1	W	5	4	203	180	3963	74	84	5609	2916	2950	-0.357215	0.314553	0.357215	1.13563	0.173483	-0.182864	-0.356347	1
5392	orf19.4297	CAL0000389	MSW1	CAL0000389	5	W	2	2	104	93	3102	185	208	4407	804	861	-0.331928	0.292482	0.331928	1.13487	0.161281	-0.169058	-0.330339	1
4970	orf19.6166	CAL0006072	ATO1	CAL0006072	3	C	12	12	117	93	809	44	52	977	2151	2159	-0.562946	0.496133	0.562946	1.13467	0.331206	-0.241008	-0.572214	1
973	orf19.1166	CAL0002073	CTA3	CAL0002073	1	C	-1	22	416	376	4069	3070	3092	24517	180	181	-0.156807	0.138205	0.156807	1.1346	0.145851	-0.0103017	-0.156153	1
958	orf19.2081	CAL0004523	POM152	CAL0004523	2	W	12	11	374	423	6380	259	246	6375	3786	3851	0.246567	0.217319	0.246567	1.13459	-0.177619	0.0742938	0.251913	1
4298	orf19.4618	CAL0003619	TIM12	CAL0003619	4	C	5	6	28983	28298	321463	62332	57339	847910	1080	1244	0.086235	0.076012	0.086235	1.13449	0.0345068	0.120456	0.0859494	1
1846	orf19.1059	CAL0001194	HHF1	CAL0001194	1	C	1	1	2330	1998	43484	9805	6106	183655	318	468	0.435389	0.383788	0.435389	1.13445	0.221773	0.68329	0.461517	1
1226	orf19.1538	CAL0005480	TLG2	CAL0005480	2	C	8	7	144	133	1031	164	189	1568	1272	1309	-0.313854	0.277538	0.313854	1.13085	0.114643	-0.20469	-0.319333	1
356	orf19.1253	CAL0002952	PHO4	CAL0002952	4	W	14	10	161	178	2730	639	594	10808	1980	2055	0.246395	0.218002	0.246395	1.13024	-0.144817	0.105353	0.25017	1
2315	orf19.4863	CAL0005432		CAL0005432	1	C	12	9	86	121	1577	99	109	2022	2511	2528	0.35134	0.311414	0.35134	1.12821	-0.492598	-0.138828	0.353771	1
4002	orf19.2602	CAL0003352	OPT1	CAL0003352	R	C	14	12	86	325	2049	216	675	8186	2352	2387	0.270591	0.239899	0.270591	1.12794	-1.91803	-1.64386	0.274175	1
3303	orf19.5216	CAL0003505	TES1	CAL0003505	2	C	5	4	185	127	1859	138	72	1722	897	1030	0.406206	0.360153	0.406206	1.12787	0.542697	0.938599	0.395903	1
5815	orf19.4418	CAL0001758		CAL0001758	4	C	10	7	102	127	923	96	93	700	1080	1087	0.358725	0.318206	0.358725	1.12734	-0.316259	0.0458037	0.362063	1
471	orf19.1876	CAL0001768		CAL0001768	2	C	5	4	124	105	1923	157	171	4196	1359	1368	-0.370837	0.329222	0.370837	1.1264	0.239951	-0.123232	-0.363183	1
4097	orf19.398	CAL0004963		CAL0004963	1	W	4	3	24	18	184	37	44	534	474	497	-0.680269	0.604234	0.680269	1.12584	0.415037	-0.249978	-0.665016	1
5638	orf19.1334	CAL0003792		CAL0003792	7	C	18	12	149	140	1076	87	107	1043	1965	1978	-0.408029	0.362513	0.408029	1.12556	0.0898855	-0.298523	-0.388409	1
5629	orf19.6317	CAL0001264	PGA48	CAL0001264	R	C	24	20	2023	2018	25922	6178	6598	80233	4113	4233	-0.095778	0.085109	0.095778	1.12536	0.00357015	-0.0948889	-0.0984591	1
1155	orf19.3555	CAL0005928		CAL0005928	2	W	8	7	52	78	1745	136	160	4538	2406	2420	0.363154	0.322915	0.363154	1.12461	-0.584963	-0.234465	0.350497	1
4314	orf19.6011	CAL0005043	RRS1	CAL0005043	1	C	-1	6	76	75	6347	767	951	20869	6	7	-0.324287	0.288525	0.324287	1.12395	0.0191088	-0.310219	-0.329328	1
5810	orf19.2614	CAL0003380	RSR1	CAL0003380	R	W	1	1	94	59	3675	89	87	4702	747	748	-0.631827	0.562207	0.631827	1.12383	0.671946	0.0327899	-0.639156	1
4559	orf19.2002	CAL0004316		CAL0004316	2	W	20	15	796	786	7925	1147	1257	14827	2883	2948	-0.151311	0.134706	0.151311	1.12327	0.0182391	-0.132119	-0.150358	1
2569	orf19.3181.1	CAF0006977		CAF0006977	5	C	1	1	57	45	661	328	189	2780	165	212	0.454909	0.405887	0.454909	1.12078	0.341037	0.79531	0.454273	1
546	orf19.5106	CAL0002491	NOT5	CAL0002491	1	C	5	4	187	181	7714	530	435	19022	2946	2965	0.242201	0.216373	0.242201	1.11937	0.0470486	0.284977	0.237928	1
2175	orf19.3761	CAL0001241		CAL0001241	1	C	14	11	302	306	4224	669	776	9913	2739	2757	-0.193033	0.172788	0.193033	1.11717	-0.0189831	-0.21405	-0.195067	1
5204	orf19.2337	CAL0000727	ALP1	CAL0000727	1	C	3	3	345	316	8402	106	74	7114	1632	1679	0.387145	0.346959	0.387145	1.11582	0.126672	0.518467	0.391795	1
3786	orf19.3670	CAL0000446		CAL0000446	1	C	1	1	15	13	845	5	11	2084	1548	1554	-1.48646	1.33409	1.48646	1.11421	0.206451	-1.1375	-1.34395	1
6037	orf19.2728	CAL0004204		CAL0004204	4	W	12	8	106	112	1401	50	36	651	1770	1790	0.583172	0.523529	0.583172	1.11392	-0.0794345	0.473931	0.553366	1
1229	orf19.4415	CAL0001754	VPS13	CAL0001754	4	W	7	5	99	111	468	324	301	1829	594	607	0.272059	0.244457	0.272059	1.11291	-0.165059	0.10623	0.27129	1
4869	orf19.262	CAL0004031	SMC3	CAL0004031	3	W	31	17	379	450	4074	383	392	4821	3714	3726	0.214722	0.193085	0.214722	1.11206	-0.247727	-0.0335093	0.214218	1
6031	orf19.5555	CAL0006182	RBF1	CAL0006182	6	C	22	18	130	125	1483	337	264	3863	3396	3411	0.290519	0.261486	0.290519	1.11103	0.0565835	0.352211	0.295627	1
4920	orf19.4243	CAL0000220		CAL0000220	5	C	11	6	93	86	499	62	83	389	879	1048	-0.524928	0.472799	0.524928	1.11026	0.112894	-0.420843	-0.533737	1
2508	orf19.3220	CAL0003244		CAL0003244	5	C	1	1	38	30	2882	231	110	7354	606	627	0.919001	0.828698	0.919001	1.10897	0.341037	1.07039	0.729352	1
4948	orf19.1779	CAL0000936	MP65	CAL0000936	2	C	24	9	4923	4877	25038	29360	31240	134125	1137	1437	-0.101958	0.091961	0.101958	1.10871	0.0135438	-0.0895425	-0.103086	1
4481	orf19.638	CAL0000982	HSP104	CAL0000982	R	C	1	1	112	106	10353	79	97	8257	1140	1329	-0.393462	0.35532	0.393462	1.10735	0.0794345	-0.296132	-0.375567	1
4255	orf19.1954	CAL0002600	PUS4	CAL0002600	5	W	11	8	570	580	4334	1136	1045	8393	1161	1201	0.148624	0.134255	0.148624	1.10703	-0.025091	0.12046	0.145551	1
2944	orf19.3940.1	CAF0007430	URA7	CAF0007430	5	C	0	3	1359	5198	36776	34	97	34776	102	334	0.39881	0.360272	0.39881	1.10697	-1.93541	-1.51245	0.422961	1
3642	orf19.6195	CAL0006149		CAL0006149	1	C	5	5	126	116	4311	179	207	5951	2235	2246	-0.321489	0.290503	0.321489	1.10666	0.119299	-0.209671	-0.32897	1
3951	orf19.3881	CAL0002179	FGR50	CAL0002179	R	C	11	9	130	109	719	60	69	476	1080	1093	-0.476034	0.43043	0.476034	1.10595	0.254183	-0.201634	-0.455817	1
5762	orf19.4478	CAL0001963		CAL0001963	1	W	23	13	220	291	2169	336	368	2484	2097	2097	0.273627	0.247477	0.273627	1.10567	-0.403516	-0.131245	0.272271	1
1622	orf19.1682	CAL0000148		CAL0000148	3	W	4	3	998	1075	25766	2049	1983	36995	1161	1287	0.150496	0.136164	0.150496	1.10526	-0.107225	0.0472353	0.15446	1
2112	orf19.4184	CAL0005854		CAL0005854	4	C	18	10	209	284	2774	588	692	7587	2010	2063	0.213879	0.193613	0.213879	1.10467	-0.442388	-0.234956	0.207432	1
5672	orf19.6460	CAL0002247		CAL0002247	7	W	10	7	116	120	2839	230	183	5526	3276	3301	0.378577	0.342865	0.378577	1.10416	-0.0489096	0.32979	0.3787	1
3055	orf19.4809	CAL0005299	GCD1	CAL0005299	1	W	5	5	792	468	9145	691	465	12447	1296	1363	-0.183519	0.166397	0.183519	1.1029	0.758992	0.571455	-0.187537	1
1906	orf19.671	CAL0001090		CAL0001090	1	C	6	6	76	69	1729	184	211	3983	2010	2016	-0.334753	0.303599	0.334753	1.10262	0.139403	-0.197537	-0.33694	1
1816	orf19.713	CAL0001740	SPT6	CAL0001740	R	W	4	5	766	780	5534	1118	951	9823	417	557	0.263521	0.2401	0.263521	1.09755	-0.0261297	0.233403	0.259533	1
1501	orf19.1299	CAL0003109	RPN6	CAL0003109	4	W	5	5	567	636	9313	1288	1303	27840	1308	1326	0.153752	0.140088	0.153752	1.09754	-0.165678	-0.0167045	0.148974	1
1755	orf19.4684.2	CAF0007021			4	C	0	1	3603	3963	162628	40	34	213332	159	588	0.374859	0.341705	0.374859	1.09703	-0.137394	0.234465	0.37186	1
4403	orf19.4732	CAL0004422	YMC2	CAL0004422	1	C	16	10	613	599	12104	3710	3318	41199	2787	2850	0.13277	0.121245	0.13277	1.09506	0.0333311	0.161105	0.127774	1
355	orf19.4161	CAL0005775	MLH1	CAL0005775	4	W	6	6	123	136	1568	164	226	3055	1116	1144	-0.304814	0.278451	0.304814	1.09468	-0.144948	-0.462627	-0.317679	1
1072	orf19.3944	CAL0002979		CAL0002979	5	C	15	14	386	312	3220	403	377	5143	2343	2385	-0.214715	0.196243	0.214715	1.09413	0.307055	0.0962153	-0.21084	1
2576	orf19.3360	CAL0004167		CAL0004167	1	W	13	11	46	53	916	128	196	2031	2004	2038	-0.415587	0.380036	0.415587	1.09355	-0.204358	-0.61471	-0.410351	1
5717	orf19.1510	CAL0005401	SRD1	CAL0005401	2	C	4	4	50	64	1636	51	45	2396	1878	1893	0.5598	0.512358	0.5598	1.0926	-0.356144	0.180572	0.536716	1
873	orf19.835	CAL0002715	GNA1	CAL0002715	2	C	17	12	442	484	4165	421	522	6300	2361	2410	-0.184451	0.168821	0.184451	1.09258	-0.130961	-0.31023	-0.179269	1
283	orf19.6133	CAL0006006	SMX4	CAL0006006	R	W	21	14	197	203	1980	294	258	2502	2721	2757	0.237603	0.217702	0.237603	1.09141	-0.0432841	0.188445	0.231729	1
2298	orf19.5057	CAL0001687	SMI1	CAL0001687	1	W	21	12	67	63	334	247	291	1180	1254	1268	-0.329077	0.301602	0.329077	1.0911	0.0888093	-0.236508	-0.325317	1
153	orf19.868	CAL0002823		CAL0002823	2	C	7	4	56	33	1217	291	120	6743	1638	1650	0.519286	0.476071	0.519286	1.09077	0.762961	1.27798	0.515024	1
1179	orf19.5799	CAL0001560	RNR21	CAL0001560	2	C	10	9	94	79	1307	283	194	3967	2061	2066	0.299772	0.275058	0.299772	1.08985	0.250808	0.544745	0.293937	1
2634	orf19.5599	CAL0006294	BMT6	CAL0006294	6	C	44	18	870	646	4238	461	388	3517	2352	2371	-0.178599	0.164036	0.178599	1.08878	0.429481	0.24871	-0.180771	1
4958	orf19.593	CAL0000368		CAL0000368	R	C	-1	8	189	187	3979	371	292	8588	2475	2476	0.238834	0.219523	0.238834	1.08797	0.015348	0.345451	0.330103	1
5760	orf19.688	CAL0001141	OSM1	CAL0001141	6	C	4	3	679	637	9867	1559	2015	17759	648	787	-0.373301	0.343387	0.373301	1.08711	0.0921182	-0.370159	-0.462277	1
3606	orf19.4299	CAL0000390	YPT53	CAL0000390	5	W	4	4	85	71	1413	219	230	3335	1200	1200	-0.3486	0.320811	0.3486	1.08662	0.259644	-0.070703	-0.330347	1
285	orf19.2564	CAL0002504		CAL0002504	R	W	6	5	94	133	837	223	397	2838	864	864	-0.318402	0.293634	0.318402	1.08435	-0.500694	-0.832095	-0.331402	1
1928	orf19.3054	CAL0001433	RPN3	CAL0001433	1	W	6	4	766	632	12867	1451	1374	18827	1446	1507	-0.197495	0.182265	0.197495	1.08356	0.27742	0.0786655	-0.198754	1
2274	orf19.1214	CAL0002793		CAL0002793	6	W	8	6	977	1424	16300	1281	1621	21467	1344	1388	0.197229	0.182022	0.197229	1.08354	-0.543519	-0.339614	0.203905	1
5195	orf19.551	CAL0000230		CAL0000230	R	W	15	11	444	507	3747	463	456	3151	1659	1677	0.210852	0.194698	0.210852	1.08297	-0.191426	0.0219784	0.213404	1
5699	orf19.2821	CAL0005078		CAL0005078	R	C	0	3	1668	1305	20188	30	15	21387	528	801	0.69781	0.644394	0.69781	1.08289	0.354069	1	0.645931	1
1048	orf19.5544	CAL0006165		CAL0006165	6	W	3	2	249	215	12599	288	291	30722	1944	1967	-0.220854	0.204085	0.220854	1.08217	0.211809	-0.0149503	-0.226759	1
1794	orf19.4497	CAL0002045		CAL0002045	2	W	2	3	70	65	920	76	92	1411	720	762	-0.382299	0.353307	0.382299	1.08206	0.106915	-0.275634	-0.38255	1
4962	orf19.434	CAL0005656		CAL0005656	1	C	3	3	178	154	11057	226	237	16136	2109	2239	-0.274163	0.253804	0.274163	1.08022	0.208947	-0.0685643	-0.277511	1
6115	orf19.1900	CAL0002493		CAL0002493	2	W	1	1	10	6	1187	49	53	1497	1452	1466	-0.896798	0.830233	0.896798	1.08018	0.736966	-0.113211	-0.850176	1
422	orf19.643	CAL0001006	PEX19	CAL0001006	R	W	11	8	46	32	1156	37	40	1088	3837	3851	-0.638358	0.591101	0.638358	1.07995	0.523562	-0.112475	-0.636037	1
3405	orf19.5855	CAL0002380	EGD2	CAL0002380	3	C	13	10	101	192	2431	155	242	3388	2559	2570	0.285219	0.264191	0.285219	1.07959	-0.926751	-0.642739	0.284012	1
6071	orf19.2154	CAL0005368	HXK1	CAL0005368	6	W	9	8	103	80	1084	172	175	1914	1482	1496	-0.402065	0.372527	0.402065	1.07929	0.364572	-0.0249464	-0.389519	1
3103	orf19.3706	CAL0001068	YHB1	CAL0001068	R	W	19	18	399	302	1844	482	318	3050	1839	1855	0.196279	0.181861	0.196279	1.07928	0.40184	0.600006	0.198166	1
2248	orf19.657	CAL0001034	ALK6	CAL0001034	1	C	10	6	1565	2574	21438	5017	6964	167822	1158	1337	0.233772	0.216823	0.233772	1.07817	-0.717849	-0.473091	0.244758	1
1467	orf19.3433	CAL0004957	TRY5	CAL0004957	6	W	10	7	62	39	558	58	23	400	1221	1251	0.697603	0.647657	0.697603	1.07712	0.668794	1.33442	0.665625	1
928	orf19.1336.2	CAF0006924		CAF0006924	7	W	3	2	203	201	2119	476	546	4336	300	420	-0.205684	0.191059	0.205684	1.07655	0.0142842	-0.197939	-0.212224	1
125	orf19.3437	CAL0004970		CAL0004970	6	W	13	8	31	45	334	50	44	647	1629	1640	0.738011	0.685598	0.738011	1.07645	-0.537657	0.184425	0.722081	1
4589	orf19.4269	CAL0000294		CAL0000294	5	C	10	9	203	163	2506	93	96	823	1755	1762	-0.359716	0.334199	0.359716	1.07635	0.316608	-0.0458037	-0.362411	1
826	orf19.2406	CAL0001455		CAL0001455	R	W	7	7	250	187	2186	363	334	2996	1122	1174	-0.30945	0.287628	0.30945	1.07587	0.41889	0.120121	-0.298768	1
2193	orf19.1961	CAL0002634		CAL0002634	5	C	27	17	1470	1201	6900	1190	865	5890	1596	1762	0.174727	0.162472	0.174727	1.07543	0.29158	0.46019	0.16861	1
2639	orf19.772	CAL0001935		CAL0001935	1	C	6	5	1267	1297	16474	1291	1146	19804	1287	1421	0.203607	0.189377	0.203607	1.07514	-0.033762	0.171882	0.205644	1
24	orf19.6219	CAL0000445		CAL0000445	1	C	6	6	42	55	791	35	30	853	1356	1376	0.62551	0.582231	0.62551	1.07433	-0.389042	0.222392	0.611435	1
1607	orf19.597	CAL0000376	PHB2	CAL0000376	R	C	2	1	69	66	4745	315	379	11730	1683	1708	-0.334649	0.311548	0.334649	1.07415	0.0641303	-0.266846	-0.330976	1
1692	orf19.512	CAL0000078	OPT5	CAL0000078	R	C	8	8	477	459	11478	1148	1250	33275	3129	3153	-0.180932	0.168726	0.180932	1.07234	0.0554951	-0.122805	-0.178301	1
5454	orf19.5643	CAL0000638		CAL0000638	4	W	4	3	20	27	865	22	49	788	1545	1549	-0.772052	0.720106	0.772052	1.07214	-0.432959	-1.15528	-0.722319	1
3445	orf19.3308	CAL0004052	STB5	CAL0004052	1	W	2	2	15	8	1172	27	32	1453	1923	1937	-1.21276	1.1337	1.21276	1.06974	0.906891	-0.245112	-1.152	1
933	orf19.557	CAL0000246		CAL0000246	R	W	4	4	137	72	2446	504	202	6307	1026	1057	0.372898	0.348715	0.372898	1.06935	0.928107	1.31907	0.390961	1
1167	orf19.3804	CAL0001904		CAL0001904	4	C	7	5	403	417	3013	126	105	2477	768	861	0.308777	0.289514	0.308777	1.06654	-0.0492675	0.263034	0.312302	1
1389	orf19.6499	CAL0002343		CAL0002343	7	W	20	9	28	35	1214	14	9	325	3657	3681	1.06278	0.99671	1.06278	1.06629	-0.321928	0.63743	0.959358	1
482	orf19.1180	CAL0002124		CAL0002124	6	W	23	12	367	399	1919	343	426	1827	1248	1264	-0.196542	0.184355	0.196542	1.06611	-0.120609	-0.312645	-0.192036	1
4268	orf19.1693	CAL0000189	CAS4	CAL0000189	3	C	77	54	480	534	4413	509	503	4657	8493	8503	0.171933	0.161361	0.171933	1.06552	-0.153805	0.0171073	0.170913	1
264	orf19.2674	CAL0003513		CAL0003513	4	C	3	2	18	14	276	9	17	180	1029	1029	-1.35933	1.27608	1.35933	1.06524	0.36257	-0.917538	-1.28011	1
5733	orf19.58	CAL0000608		CAL0000608	1	C	9	9	382	390	6778	341	404	8267	2361	2384	-0.222039	0.208719	0.222039	1.06382	-0.0299015	-0.244584	-0.214682	1
200	orf19.6855	CAL0005799		CAL0005799	1	W	11	10	301	289	3927	763	853	9488	1731	1812	-0.216299	0.203466	0.216299	1.06307	0.058694	-0.160863	-0.219557	1
5729	orf19.3341	CAL0004134		CAL0004134	1	C	4	3	496	508	29020	1237	1431	54067	1869	1973	-0.176803	0.166359	0.176803	1.06278	-0.0344884	-0.210178	-0.17569	1
4279	orf19.2265	CAL0006320		CAL0006320	2	W	14	8	645	655	6133	827	945	11202	1410	1464	-0.176005	0.165793	0.176005	1.06159	-0.0221957	-0.192427	-0.170231	1
5283	orf19.3569	CAL0005955		CAL0005955	2	W	2	2	35	33	1275	33	42	2135	1119	1136	-0.445932	0.420202	0.445932	1.06123	0.0848889	-0.347923	-0.432812	1
4832	orf19.5809	CAL0002259		CAL0002259	2	W	12	10	444	363	2914	341	240	2681	1362	1373	0.216466	0.204061	0.216466	1.06079	0.29059	0.506737	0.216147	1
3884	orf19.6319	CAL0001266	HPA2	CAL0001266	6	C	25	15	507	502	3060	1463	1260	8209	1977	2013	0.186658	0.175975	0.186658	1.06071	0.0142984	0.215506	0.201208	1
1987	orf19.4144	CAL0005714	ZCF20	CAL0005714	5	C	27	17	230	259	1313	593	575	3401	1812	1832	0.211245	0.199372	0.211245	1.05955	-0.171318	0.0444701	0.215788	1
1492	orf19.3932	CAL0002930		CAL0002930	5	C	4	3	23	13	405	78	29	1487	828	844	0.652622	0.616136	0.652622	1.05922	0.823122	1.42742	0.604299	1
1510	orf19.1467	CAL0004657	COX13	CAL0004657	2	W	1	1	1438	1137	42218	1478	1295	87557	405	550	-0.162827	0.153746	0.162827	1.05906	0.338831	0.190694	-0.148137	1
4743	orf19.3218	CAL0003229		CAL0003229	5	C	4	4	43	63	1581	30	71	1369	1467	1477	-0.717364	0.677615	0.717364	1.05866	-0.551015	-1.24286	-0.691841	1
3393	orf19.1625	CAL0006373		CAL0006373	3	C	4	4	545	803	4905	3011	4802	21049	423	454	-0.114362	0.108085	0.114362	1.05807	-0.559144	-0.673393	-0.114249	1
5705	orf19.2170	CAL0005406	PHM7	CAL0005406	2	C	18	13	783	645	7615	1089	994	17064	2784	2853	-0.148751	0.140615	0.148751	1.05786	0.279713	0.131686	-0.148027	1
2311	orf19.1591	CAL0005678	ERG10	CAL0005678	2	W	4	4	1242	1309	24582	3018	2919	100187	1209	1391	0.128439	0.121554	0.128439	1.05664	-0.0757999	0.0481186	0.123919	1
4553	orf19.6885	CAL0005903		CAL0005903	2	W	2	3	63	64	2458	59	90	3880	1545	1652	-0.531693	0.504684	0.531693	1.05352	-0.0227201	-0.60921	-0.58649	1
2146	orf19.54	CAL0000604		CAL0000604	1	W	2	2	168	140	10095	65	76	6219	1965	2088	-0.440035	0.417758	0.440035	1.05333	0.263034	-0.22556	-0.488594	1
340	orf19.2186	CAL0005451	SEH1	CAL0005451	2	W	2	2	65	49	2300	34	41	1993	1044	1044	-0.635731	0.603674	0.635731	1.0531	0.407658	-0.270089	-0.677747	1
5398	orf19.5705	CAL0001358	YMX6	CAL0001358	6	C	58	24	718	648	2762	618	620	3796	2586	2790	-0.152352	0.144842	0.152352	1.05185	0.14799	-0.00466138	-0.152651	1
666	orf19.4602	CAL0003583	ARL1	CAL0003583	4	C	1	1	432	364	34837	1494	1461	197012	999	1063	-0.240508	0.228868	0.240508	1.05086	0.247093	0.032224	-0.214869	1
4167	orf19.1569	CAL0005569	UTP22	CAL0005569	2	C	5	4	90	68	8510	367	340	22615	3528	3544	-0.297162	0.282897	0.297162	1.05042	0.40439	0.110245	-0.294145	1
1297	orf19.1259	CAL0002960		CAL0002960	4	C	20	16	330	284	4857	230	235	3603	4332	4342	-0.249609	0.237664	0.249609	1.05026	0.216575	-0.0310269	-0.247602	1
5605	orf19.2129	CAL0005310		CAL0005310	6	C	13	9	31	42	690	32	28	383	2502	2502	0.635905	0.6061	0.635905	1.04918	-0.438121	0.192645	0.630766	1
3825	orf19.3173	CAL0002393		CAL0002393	5	C	6	4	177	168	1731	371	426	3828	681	694	-0.27037	0.257726	0.27037	1.04906	0.0752881	-0.199434	-0.274722	1
726	orf19.394	CAL0004950		CAL0004950	1	W	6	4	192	169	3752	260	191	4319	1386	1411	0.248965	0.237349	0.248965	1.04894	0.184083	0.444939	0.260856	1
1376	orf19.3977	CAL0003099		CAL0003099	5	C	2	2	121	115	5082	949	770	15143	1110	1126	0.246657	0.235453	0.246657	1.04758	0.0733732	0.30155	0.228176	1
2409	orf19.4749	CAL0004463		CAL0004463	1	W	5	5	76	44	1464	119	90	2535	1677	1691	-0.374425	0.357485	0.374425	1.04739	0.788496	0.402965	-0.385531	1
4309	orf19.4800	CAL0005286		CAL0005286	1	W	9	8	71	75	1839	75	56	1599	2358	2398	0.505639	0.48278	0.505639	1.04735	-0.0790716	0.421464	0.500535	1
4207	orf19.3733	CAL0001167	GEF2	CAL0001167	R	W	5	5	154	143	2174	205	235	5238	1239	1264	-0.293209	0.279988	0.293209	1.04722	0.106915	-0.197037	-0.303952	1
1842	orf19.3675	CAL0000451	ABP140	CAL0000451	1	W	5	4	48	49	1025	132	98	2794	1161	1174	0.463102	0.442296	0.463102	1.04704	-0.0297473	0.429684	0.459432	1
5747	orf19.1936	CAL0002564	SNF1	CAL0002564	5	W	3	4	311	322	4320	370	455	17748	1857	1922	-0.257982	0.246509	0.257982	1.04654	-0.0501461	-0.298341	-0.248195	1
5754	orf19.261	CAL0004029		CAL0004029	3	C	35	20	1165	906	3789	1351	1151	6084	1761	1779	-0.128435	0.122741	0.128435	1.04639	0.362747	0.23114	-0.131607	1
2850	orf19.6213	CAL0000442		CAL0000442	1	W	3	3	807	780	18060	1784	1561	43209	903	948	0.147478	0.141017	0.147478	1.04582	0.0490945	0.192645	0.143551	1
5072	orf19.164	CAL0003185		CAL0003185	R	C	4	4	11	26	386	20	28	551	1206	1218	0.778302	0.745057	0.778302	1.04462	-1.24101	-0.485427	0.755581	1
4569	orf19.3192	CAL0002444	STI1	CAL0002444	5	W	15	13	1500	1483	14616	9230	9910	93285	1770	1938	-0.11671	0.11175	0.11671	1.04438	0.0164439	-0.102554	-0.118998	1
364	orf19.4910	CAL0006224		CAL0006224	1	C	3	3	327	313	4396	385	306	8605	753	970	0.267768	0.256472	0.267768	1.04404	0.063128	0.331327	0.268199	1
86	orf19.4952	CAL0006328		CAL0006328	1	W	6	6	437	501	4475	172	160	3712	939	1003	0.30332	0.290688	0.30332	1.04346	-0.197177	0.104337	0.301514	1
5886	orf19.1470	CAL0004688	RPS26A	CAL0004688	2	C	1	1	4223	4687	102179	32547	32397	745731	360	452	0.133445	0.127914	0.133445	1.04324	-0.150397	0.00666435	0.157061	1
876	orf19.198	CAL0003290	ASN1	CAL0003290	2	C	9	8	3742	3281	51026	14012	13110	175706	1722	1839	-0.08757	0.083999	0.08757	1.04251	0.189674	0.0959952	-0.0936788	1
2862	orf19.3455	CAL0005011		CAL0005011	6	C	13	6	48	59	751	168	159	998	1362	1384	0.382067	0.36656	0.382067	1.0423	-0.297681	0.0794345	0.377115	1
4852	orf19.3534	CAL0005878		CAL0005878	2	C	-1	1	103	86	3658	197	209	6159	57	58	-0.354501	0.340577	0.354501	1.04088	0.260236	-0.0853073	-0.345543	1
5693	orf19.3695	CAL0000487	TOM22	CAL0000487	7	C	1	1	111	154	8605	25	58	7607	1209	1342	-0.710303	0.683112	0.710303	1.0398	-0.472371	-1.21412	-0.741754	1
4359	orf19.5731	CAL0001418	CDC50	CAL0001418	6	W	3	3	34	46	631	7	5	187	690	728	0.920436	0.885338	0.920436	1.03964	-0.436099	0.485427	0.921526	1
2775	orf19.1985	CAL0002707		CAL0002707	R	W	6	6	24	19	280	30	15	368	1212	1226	0.702844	0.676562	0.702844	1.03885	0.337035	1	0.662965	1
5027	orf19.2483	CAL0001631	RIM1	CAL0001631	1	C	2	2	745	708	14829	1785	1456	27930	432	548	0.212656	0.204921	0.212656	1.03775	0.0734911	0.293914	0.220423	1
4791	orf19.6245	CAL0000497		CAL0000497	1	W	10	8	338	354	3986	302	269	4678	1701	1716	0.242452	0.233685	0.242452	1.03752	-0.0667261	0.166942	0.233668	1
1406	orf19.2475	CAL0001610	PGA26	CAL0001610	1	C	3	1	33	85	726	271	516	7924	396	410	0.453404	0.437244	0.453404	1.03696	-1.365	-0.929078	0.435919	1
5636	orf19.1091	CAL0001277	NOP8	CAL0001277	6	W	10	8	257	295	4103	510	505	7221	2070	2088	0.219222	0.211473	0.219222	1.03664	-0.198947	0.0142139	0.21316	1
645	orf19.4874	CAL0005465		CAL0005465	1	C	9	7	255	297	5442	290	289	5053	1821	1972	0.218645	0.211046	0.218645	1.03601	-0.219966	0.00498341	0.224949	1
2978	orf19.4727	CAL0004404		CAL0004404	1	W	2	3	228	249	2154	626	593	8950	468	484	0.207704	0.200555	0.207704	1.03565	-0.127112	0.0781306	0.205242	1
3522	orf19.352	CAL0004823	ARH2	CAL0004823	3	W	5	4	101	112	2664	49	68	1866	1632	1632	-0.343957	0.332128	0.343957	1.03562	-0.149143	-0.472753	-0.32361	1
977	orf19.4215	CAL0000100		CAL0000100	6	C	3	3	77	79	2672	315	258	13240	1878	2120	0.32575	0.31481	0.32575	1.03475	-0.0369942	0.287981	0.324975	1
561	orf19.4905	CAL0006202		CAL0006202	1	W	5	2	37	28	696	13	5	206	1554	1554	1.05017	1.01496	1.05017	1.0347	0.402098	1.37851	0.976413	1
59	orf19.3751	CAL0001213	RAD51	CAL0001213	R	W	10	7	85	71	2217	257	264	7620	2985	2999	-0.303525	0.293583	0.303525	1.03386	0.259644	-0.0387696	-0.298413	1
4570	orf19.539	CAL0000177		CAL0000177	R	C	6	5	96	5	851	78	9	634	1530	1530	-1.16466	1.12654	1.16466	1.03383	4.26303	3.11548	-1.14756	1
1367	orf19.486	CAL0005838		CAL0005838	R	W	6	5	52	64	1237	59	53	1331	2688	2724	0.489736	0.47413	0.489736	1.03292	-0.29956	0.154723	0.454283	1
1550	orf19.5821	CAL0002298	NCB2	CAL0002298	2	C	6	6	49	44	1595	14	20	687	3570	3574	-0.697744	0.675679	0.697744	1.03266	0.155278	-0.514573	-0.669851	1
1769	orf19.188	CAL0003257		CAL0003257	2	W	22	18	359	365	2914	140	171	1307	2451	2524	-0.263986	0.255924	0.263986	1.0315	-0.0239126	-0.288569	-0.264657	1
1994	orf19.4240	CAL0000211		CAL0000211	5	C	8	6	276	278	3330	112	141	1790	1185	1218	-0.314953	0.305394	0.314953	1.0313	-0.0104166	-0.332196	-0.32178	1
5663	orf19.1956	CAL0002602		CAL0002602	5	C	14	8	589	636	7903	825	792	14064	2262	2298	0.169206	0.164093	0.169206	1.03116	-0.110759	0.0588937	0.169653	1
1570	orf19.2393	CAL0000836		CAL0000836	R	C	-1	2	79	81	2937	126	142	5477	21	22	-0.257336	0.249885	0.257336	1.02982	-0.0360693	-0.172467	-0.136398	1
3712	orf19.3799	CAL0001315	FAV1	CAL0001315	4	W	3	3	523	415	12844	2117	1866	64741	1101	1406	-0.150409	0.146083	0.150409	1.02961	0.3337	0.182072	-0.151627	1
3911	orf19.6462	CAL0002251		CAL0002251	7	C	-1	2	105	151	2277	54	54	2445	21	22	0.531565	0.516613	0.531565	1.02894	-0.524159	0	0.524159	1
706	orf19.4882	CAL0005496		CAL0005496	1	C	6	5	292	262	3294	178	225	3620	855	970	-0.457179	0.44438	0.457179	1.0288	0.156402	-0.338048	-0.494449	1
166	orf19.2297	CAL0006416	ARL3	CAL0006416	1	W	2	3	81	93	1687	145	130	2229	771	786	0.337737	0.328675	0.337737	1.02757	-0.199309	0.157541	0.35685	1
913	orf19.3394	CAL0004222		CAL0004222	6	W	1	1	40	51	1925	12	26	1949	630	649	-0.887817	0.864056	0.887817	1.0275	-0.350497	-1.11548	-0.76498	1
1515	orf19.2488	CAL0001638	FAL1	CAL0001638	1	C	2	3	152	172	3360	78	118	5760	1200	1234	-0.426385	0.415152	0.426385	1.02706	-0.178337	-0.597241	-0.418904	1
3422	orf19.5768	CAL0001497	PBP2	CAL0001497	6	W	9	6	720	735	6298	541	612	6021	1011	1041	-0.147527	0.143777	0.147527	1.02608	-0.0297473	-0.177903	-0.148156	1
2919	orf19.346	CAL0004796		CAL0004796	3	C	8	8	126	205	1892	96	121	2637	1563	1629	0.362297	0.353255	0.362297	1.0256	-0.7022	-0.333901	0.368299	1
6180	orf19.5485	CAL0005342	CDC46	CAL0005342	2	C	1	1	8	9	600	5	16	656	960	966	-1.40307	1.36809	1.40307	1.02557	-0.169925	-1.67807	-1.50815	1
1650	orf19.4012	CAL0004676		CAL0004676	5	W	1	1	7	15	871	13	12	865	915	929	1.17546	1.14624	1.17546	1.0255	-1.09954	0.115477	1.21501	1
1071	orf19.3788.1	CAF0006997	RPL24A	CAF0006997	4	W	3	3	12723	13138	88282	52750	62126	340581	321	322	-0.177766	0.173614	0.177766	1.02392	-0.0463068	-0.236026	-0.189719	1
2120	orf19.6322	CAL0001287		CAL0001287	6	W	1	1	82	82	4052	119	156	11131	846	887	-0.418301	0.408605	0.418301	1.02373	0	-0.390584	-0.390584	1
4696	orf19.6357	CAL0001345		CAL0001345	1	W	6	4	88	75	2216	131	82	2326	2091	2112	0.471512	0.460759	0.471512	1.02334	0.230613	0.675871	0.445258	1
5951	orf19.3357	CAL0004161	LSC1	CAL0004161	1	C	4	6	875	1040	7145	1049	1130	12732	513	711	0.14121	0.138098	0.14121	1.02253	-0.249229	-0.107308	0.141921	1
550	orf19.809	CAL0002615		CAL0002615	2	C	7	4	187	246	4545	1149	1290	24392	1368	1377	0.232845	0.227727	0.232845	1.02247	-0.39562	-0.166992	0.228628	1
4677	orf19.4163	CAL0005781		CAL0005781	4	C	7	6	166	155	5057	115	136	3437	3219	3253	-0.354819	0.347331	0.354819	1.02156	0.098915	-0.241973	-0.340888	1
1174	orf19.3784	CAL0001298			4	W	8	6	28	17	191	5	8	24	1767	882	-1.39107	1.36274	1.39107	1.02079	0.719892	-0.678072	-1.39796	1
2873	orf19.2091	CAL0004559		CAL0004559	2	C	2	3	625	437	11608	1043	859	37111	732	909	-0.219501	0.215293	0.219501	1.01955	0.516223	0.280009	-0.236214	1
1564	orf19.3204	CAL0003193		CAL0003193	5	C	16	13	296	295	2641	126	160	1292	2217	2244	-0.331157	0.324913	0.331157	1.01922	0.00488222	-0.344648	-0.34953	1
2683	orf19.3213	CAL0003219		CAL0003219	5	W	5	5	93	79	2780	149	99	4237	2481	2492	0.369722	0.362842	0.369722	1.01896	0.235378	0.589812	0.354434	1
4266	orf19.182	CAL0003239		CAL0003239	2	W	10	6	271	304	3859	593	574	7633	1416	1434	0.213846	0.209986	0.213846	1.01838	-0.165778	0.0469814	0.21276	1
3072	orf19.458	CAL0005742		CAL0005742	R	C	4	3	134	152	4105	158	248	4347	1335	1348	-0.506196	0.497929	0.506196	1.0166	-0.181838	-0.650416	-0.468577	1
3070	orf19.470	CAL0005789		CAL0005789	R	C	4	4	23	16	1307	110	118	5907	2253	2273	-0.656681	0.64622	0.656681	1.01619	0.523562	-0.101283	-0.624845	1
2986	orf19.2227	CAL0006221		CAL0006221	2	C	13	4	69	47	533	18	21	138	1251	1251	-0.782543	0.770358	0.782543	1.01582	0.553936	-0.222392	-0.776328	1
5938	orf19.2379	CAL0000791	NOT4	CAL0000791	R	C	-1	7	216	179	2861	804	768	11465	15	16	-0.206066	0.202924	0.206066	1.01548	0.271072	0.0660892	-0.204983	1
5228	orf19.36.1	CAL0120705	FUR4	CAL0120705	2	C	1	1	23	34	328	55	131	845	207	229	-0.644677	0.635195	0.644677	1.01493	-0.563901	-1.25206	-0.688162	1
5070	orf19.6351	CAL0001336		CAL0001336	1	C	6	5	85	90	1202	129	108	1891	1404	1418	0.336382	0.331484	0.336382	1.01478	-0.0824622	0.25634	0.338802	1
633	orf19.3714	CAL0001101	ASF1	CAL0001101	R	W	2	2	41	54	1505	27	19	1481	1848	1925	0.870664	0.858419	0.870664	1.01426	-0.397335	0.50696	0.904295	1
4208	orf19.1149	CAL0002010	MRF1	CAL0002010	1	C	3	3	33	38	890	127	107	2595	1080	1115	0.471241	0.464809	0.471241	1.01384	-0.203533	0.247218	0.450751	1
2407	orf19.6953	CAL0000299		CAL0000299	3	W	7	5	85	85	1473	88	112	2159	1917	1931	-0.343763	0.3393	0.343763	1.01315	0	-0.347923	-0.347923	1
2244	orf19.757	CAL0001868	UBC4	CAL0001868	1	W	32	19	439	413	3065	691	728	4047	2571	2598	-0.160746	0.158684	0.160746	1.01299	0.0880792	-0.0752527	-0.163332	1
3313	orf19.2971	CAL0006103		CAL0006103	1	W	8	7	112	100	1746	81	95	1273	1770	1813	-0.397494	0.392804	0.397494	1.01194	0.163499	-0.230006	-0.393504	1
5741	orf19.2397.3	CAF0006949		CAF0006949	R	W	8	5	27	40	375	33	29	473	1017	1018	0.751667	0.743141	0.751667	1.01147	-0.567041	0.186413	0.753454	1
3013	orf19.4813	CAL0005313		CAL0005313	1	C	9	6	2520	2188	35668	4976	4625	110963	1593	1686	-0.098014	0.096933	0.098014	1.01115	0.203811	0.105533	-0.0982779	1
3412	orf19.3212	CAL0003216	MID1	CAL0003216	5	W	4	3	99	85	2111	91	55	2066	1680	1721	0.529776	0.523988	0.529776	1.01105	0.219966	0.726435	0.506469	1
298	orf19.1793	CAL0000996		CAL0000996	4	W	9	6	13	10	284	33	46	450	1788	1810	-0.915974	0.906576	0.915974	1.01037	0.378512	-0.479168	-0.857679	1
1166	orf19.1934	CAL0002561	HST3	CAL0002561	5	W	15	10	267	290	2618	271	251	2966	1464	1672	0.236412	0.234034	0.236412	1.01016	-0.119213	0.110605	0.229819	1
676	orf19.4931	CAL0006275	RPL14	CAL0006275	1	C	18	15	2110	1787	17904	3699	3329	36823	2346	2391	-0.088377	0.087493	0.088377	1.0101	0.239703	0.152046	-0.0876569	1
271	orf19.5671	CAL0000711	PGA10	CAL0000711	4	C	3	3	54	50	5184	248	302	12036	2436	2462	-0.373967	0.370291	0.373967	1.00993	0.111031	-0.284208	-0.39524	1
2426	orf19.1392	CAL0003969		CAL0003969	2	W	4	4	63	61	1813	83	110	3746	2214	2229	-0.445146	0.441349	0.445146	1.0086	0.0465426	-0.40632	-0.452863	1
937	orf19.185	CAL0003248		CAL0003248	2	C	7	6	631	616	6690	1668	1469	18439	1107	1147	0.147034	0.14583	0.147034	1.00826	0.0347097	0.183285	0.148575	1
2038	orf19.3366	CAL0004176		CAL0004176	4	W	5	4	588	416	5389	428	347	8939	711	789	-0.195744	0.194212	0.195744	1.00789	0.499233	0.302675	-0.196557	1
1073	orf19.5667	CAL0000696		CAL0000696	4	W	2	2	43	41	2335	94	130	6928	2394	2410	-0.530315	0.526409	0.530315	1.00742	0.0687128	-0.467779	-0.536492	1
1494	orf19.6238	CAL0000481	CYK3	CAL0000481	1	C	12	8	190	282	1808	243	419	1755	1203	1203	-0.218633	0.21763	0.218633	1.00461	-0.569696	-0.785994	-0.216298	1
3504	orf19.3811	CAL0001941	SSZ1	CAL0001941	4	W	10	10	119	126	1500	136	176	1532	1695	1710	-0.294965	0.293778	0.294965	1.00404	-0.0824622	-0.371969	-0.289507	1
936	orf19.6163	CAL0006066		CAL0006066	3	W	2	2	66	78	1549	56	89	3291	636	668	-0.442399	0.440823	0.442399	1.00358	-0.241008	-0.668379	-0.42737	1
424	orf19.6257	CAL0000516	BPH1	CAL0000516	1	W	44	26	3216	3563	29380	2868	3377	46137	6381	6533	-0.087819	0.087638	0.087819	1.00207	-0.147825	-0.235697	-0.0878721	1
1477	orf19.2507	CAL0002366	ARP9	CAL0002366	3	W	4	3	204	232	4966	365	354	7422	1455	1476	0.235924	0.235698	0.235924	1.00096	-0.185556	0.0441471	0.229703	1
3468	orf19.3809	CAL0001915		CAL0001915	4	W	12	12	230	264	2219	391	389	4209	2217	2319	0.210417	0.210298	0.210417	1.00057	-0.198904	0.00739845	0.206303	1
5952	orf19.2333	CAL0000720		CAL0000720	1	C	5	3	194	204	4208	228	330	6705	1491	1503	-0.387712	0.388407	0.387712	0.998211	-0.0725125	-0.533432	-0.46092	1
4916	orf19.4662	CAL0003752	NAT4	CAL0003752	4	W	6	4	15	24	658	51	54	1375	1836	1850	0.606523	0.607766	0.606523	0.997955	-0.678072	-0.0824622	0.59561	1
2443	orf19.1484	CAL0004736		CAL0004736	2	W	1	2	49	35	1253	14	17	1113	762	774	-0.810287	0.81228	0.810287	0.997546	0.485427	-0.280108	-0.765535	1
2562	orf19.5194.1	CAF0007032	URA6	CAF0007032	1	C	-1	5	481	300	2249	1398	746	4559	33	34	0.227927	0.228561	0.227927	0.997226	0.681074	0.906117	0.225042	1
4205	orf19.5215	CAL0003504		CAL0003504	2	C	5	4	9	15	151	18	15	253	1062	1062	1.0759	1.07923	1.0759	0.996912	-0.736966	0.263034	1	1
4465	orf19.3414	CAL0004898	PTK2	CAL0004898	6	C	2	4	1381	1142	14265	956	875	41972	813	1174	-0.147962	0.14849	0.147962	0.996444	0.274151	0.127728	-0.146423	1
2676	orf19.2607	CAL0003361		CAL0003361	R	W	4	4	13	68	581	27	89	1502	924	939	0.674032	0.676467	0.674032	0.9964	-2.38702	-1.72085	0.666177	1
1447	orf19.3371	CAL0004187		CAL0004187	4	C	28	16	483	354	2558	855	549	3576	1830	1886	0.189796	0.190482	0.189796	0.996399	0.448274	0.639118	0.190844	1
1403	orf19.5282	CAL0003643		CAL0003643	1	W	15	9	33	58	334	36	92	527	1443	1455	-0.550798	0.553016	0.550798	0.995989	-0.813587	-1.35364	-0.54005	1
203	orf19.3106	CAL0002221	MET16	CAL0002221	4	W	1	1	69	77	3931	68	57	5265	759	817	0.39567	0.39806	0.39567	0.993996	-0.158262	0.254573	0.412835	1
578	orf19.4535	CAL0002725	CYS4	CAL0002725	1	C	18	13	48	71	583	75	77	704	2328	2348	0.52558	0.529737	0.52558	0.992153	-0.564785	-0.0379679	0.526817	1
807	orf19.270	CAL0004054		CAL0004054	3	W	4	2	21	6	70	73	10	297	315	330	0.996681	1.00473	0.996681	0.991989	1.80735	2.8679	1.06054	1
4392	orf19.2514	CAL0002386		CAL0002386	3	W	1	1	22	41	1647	19	21	3738	1062	1089	0.749367	0.756734	0.749367	0.990265	-0.89812	-0.14439	0.75373	1
5233	orf19.1036	CAL0001124	MNS1	CAL0001124	1	C	5	5	211	288	5396	78	130	3861	1848	1878	-0.299481	0.302594	0.299481	0.989712	-0.448826	-0.736966	-0.28814	1
1446	orf19.4553	CAL0002786	ALS4	CAL0002786	6	C	11	8	116	130	1469	218	293	4477	2166	2194	-0.272444	0.275672	0.272444	0.98829	-0.164387	-0.426573	-0.262186	1
3381	orf19.4519	CAL0002663		CAL0002663	2	C	7	5	211	232	4960	75	65	3220	2163	2219	0.333641	0.337777	0.333641	0.987755	-0.136882	0.206451	0.343333	1
4951	orf19.1977	CAL0002674	URA4	CAL0002674	5	C	2	2	178	265	7544	428	515	15945	1077	1095	0.373228	0.378324	0.373228	0.98653	-0.574115	-0.266962	0.307153	1
2087	orf19.6341	CAL0001317	RBK1	CAL0001317	1	W	8	3	267	190	2034	430	258	1954	915	928	0.248892	0.252294	0.248892	0.986516	0.49084	0.736966	0.246125	1
2998	orf19.3774	CAL0001271		CAL0001271	4	C	2	2	18	8	781	21	18	1161	1251	1251	-0.949343	0.96429	0.949343	0.984499	1.16993	0.222392	-0.947533	1
3213	orf19.1400	CAL0004448		CAL0004448	2	C	21	13	269	260	3040	157	181	1712	2244	2264	-0.262823	0.267075	0.262823	0.984079	0.0490945	-0.205225	-0.25432	1
5493	orf19.3540	CAL0005900	ERF1	CAL0005900	2	W	9	8	327	279	6226	895	890	15987	2349	2365	-0.221952	0.225578	0.221952	0.983926	0.229026	0.00808235	-0.220943	1
1220	orf19.3350	CAL0004150		CAL0004150	1	W	3	4	1086	1105	15681	890	1019	24790	882	1005	-0.168066	0.170842	0.168066	0.983751	-0.0250223	-0.195277	-0.170255	1
4316	orf19.2794	CAL0004303		CAL0004303	1	W	7	7	562	685	4196	946	1016	8345	834	861	0.186883	0.189981	0.186883	0.983693	-0.285534	-0.102988	0.182546	1
1319	orf19.1010	CAL0001038	MNT3	CAL0001038	R	W	10	7	93	81	1171	19	10	184	1137	1191	0.75854	0.772034	0.75854	0.982521	0.199309	0.925999	0.726691	1
2597	orf19.5071	CAL0001753	DPM1	CAL0001753	1	W	5	5	60	59	1298	176	223	5966	2292	2380	-0.352892	0.359242	0.352892	0.982324	0.0242475	-0.341468	-0.365716	1
1591	orf19.544.1	CAF0006901		CAF0006901	R	W	2	2	457	585	10815	530	606	18116	753	754	0.172004	0.175237	0.172004	0.981551	-0.356242	-0.193325	0.162917	1
5096	orf19.101	CAL0002962	RIM9	CAL0002962	6	W	27	9	159	138	530	44	26	129	1041	1067	0.567903	0.57865	0.567903	0.981427	0.204358	0.758992	0.554633	1
2714	orf19.1514	CAL0005407		CAL0005407	2	W	6	6	844	850	10172	718	631	10476	1023	1286	0.198122	0.202026	0.198122	0.980676	-0.0102198	0.186344	0.196564	1
2916	orf19.6931	CAL0000231	RAD53	CAL0000231	3	C	2	1	60	79	4170	16	32	3550	1470	1482	-0.78273	0.799482	0.78273	0.979046	-0.39689	-1	-0.60311	1
1504	orf19.3184	CAL0002420		CAL0002420	5	C	10	5	174	191	781	296	273	1854	648	660	0.240533	0.245869	0.240533	0.978297	-0.134485	0.116696	0.251182	1
5688	orf19.2426	CAL0001500		CAL0001500	R	C	5	4	321	315	2919	368	321	7049	783	812	0.175041	0.17899	0.175041	0.977937	0.0272215	0.197132	0.169911	1
57	orf19.5056	CAL0001686		CAL0001686	1	C	14	9	52	103	631	97	148	1186	1440	1454	0.37241	0.38086	0.37241	0.977813	-0.986061	-0.609541	0.37652	1
373	orf19.244	CAL0003981	DCG1	CAL0003981	3	C	4	4	89	103	1055	171	164	2447	699	714	0.285547	0.292099	0.285547	0.977569	-0.210767	0.0603005	0.271068	1
2489	orf19.3997	CAL0003176		CAL0003176	5	W	-1	8	51343	54592	393210	120463	120939	808647	1053	1412	0.083216	0.085185	0.083216	0.976886	-0.088522	-0.00568946	0.0828325	1
621	orf19.3325	CAL0004098		CAL0004098	1	C	4	4	71	54	2698	123	124	4702	1983	2158	-0.415617	0.42553	0.415617	0.976704	0.39486	-0.0116818	-0.406541	1
5145	orf19.2238	CAL0006248	LTE1	CAL0006248	2	W	14	11	134	144	4077	176	151	4583	4956	5035	0.317316	0.325001	0.317316	0.976354	-0.103836	0.221027	0.324863	1
2453	orf19.316	CAL0004667	SEC13	CAL0004667	3	W	1	1	92	106	7260	476	451	15062	897	982	0.265857	0.272312	0.265857	0.976296	-0.204358	0.0778341	0.282193	1
5755	orf19.6843	CAL0005761	PHO85	CAL0005761	1	W	1	2	134	159	4370	185	146	7534	1122	1197	0.552879	0.566947	0.552879	0.975186	-0.246794	0.341557	0.588351	1
2462	orf19.2391	CAL0000832		CAL0000832	R	W	6	5	70	65	1019	195	226	2977	1074	1090	-0.315547	0.323915	0.315547	0.974166	0.106915	-0.212849	-0.319764	1
6111	orf19.76	CAL0000659		CAL0000659	6	C	11	13	1268	966	14339	1605	1336	22153	2538	2603	-0.127846	0.131262	0.127846	0.973976	0.39246	0.264653	-0.127806	1
1169	orf19.2844	CAL0005138	APL4	CAL0005138	R	W	14	9	365	299	4111	401	375	9406	2487	2550	-0.199843	0.20533	0.199843	0.973277	0.287751	0.0967116	-0.191039	1
2066	orf19.332.1	CAL0120690		CAL0120690	3	C	1	2	532	389	8338	823	695	16538	285	474	-0.202867	0.208541	0.202867	0.972792	0.451656	0.243879	-0.207777	1
1144	orf19.3446	CAL0004995		CAL0004995	6	C	4	4	139	171	1715	212	205	2250	618	640	0.346674	0.356422	0.346674	0.97265	-0.298911	0.0484404	0.347352	1
823	orf19.1638	CAL0006412		CAL0006412	3	W	18	14	100	70	890	100	92	1058	2586	2601	-0.410586	0.422196	0.410586	0.972501	0.514573	0.120294	-0.394279	1
4881	orf19.6399	CAL0001436	CYS3	CAL0001436	R	W	4	4	61	56	605	49	60	528	903	910	-0.437226	0.450257	0.437226	0.971059	0.123382	-0.292181	-0.415563	1
4085	orf19.2203.1	CAL0120612		CAL0120612	2	C	4	4	13	9	48	34	40	200	297	303	-0.831159	0.85646	0.831159	0.970459	0.530515	-0.234465	-0.76498	1
1485	orf19.6321	CAL0001286	VID27	CAL0001286	6	W	4	2	100	103	909	365	448	3291	327	340	-0.257563	0.265491	0.257563	0.970138	-0.0426443	-0.295602	-0.252958	1
2148	orf19.3648	CAL0000408		CAL0000408	6	C	-1	6	59	55	1167	102	121	1514	6	7	-0.349577	0.360732	0.349577	0.969077	0.101283	-0.246438	-0.347721	1
2040	orf19.333	CAL0004745	FCY2	CAL0004745	3	W	19	8	602	407	3129	815	494	4585	1581	1614	0.161804	0.167384	0.161804	0.966663	0.564735	0.722289	0.157554	1
596	orf19.3934	CAL0002934		CAL0002934	5	C	7	5	957	837	11068	3107	2948	30160	954	1003	-0.116508	0.120709	0.116508	0.965197	0.193291	0.0757857	-0.117506	1
3944	orf19.2465	CAL0001585	POL32	CAL0001585	1	W	1	1	64	62	2947	83	106	4667	1212	1242	-0.46724	0.484736	0.46724	0.963906	0.0458037	-0.352881	-0.398685	1
716	orf19.1204	CAL0002766		CAL0002766	6	C	6	4	81	85	1799	145	122	2179	1539	1547	0.326193	0.338868	0.326193	0.962596	-0.0695409	0.249172	0.318713	1
3462	orf19.1440	CAL0004584		CAL0004584	4	W	10	7	274	294	2376	98	83	2497	1116	1207	0.341093	0.354631	0.341093	0.961825	-0.10164	0.23967	0.341311	1
4416	orf19.55	CAL0000605	YAF9	CAL0000605	1	C	7	4	304	280	3128	253	281	2657	975	1010	-0.257913	0.268334	0.257913	0.961164	0.118644	-0.151433	-0.270077	1
2240	orf19.1992	CAL0002739	SIR2	CAL0002739	2	C	7	8	72	89	842	102	91	1405	1560	1580	0.458594	0.477256	0.458594	0.960897	-0.305808	0.164631	0.470439	1
5263	orf19.1519	CAL0005417		CAL0005417	2	W	47	28	330	350	1953	380	452	2487	3303	3317	-0.168325	0.175222	0.168325	0.960639	-0.0848889	-0.250323	-0.165434	1
1750	orf19.3753	CAL0001215		CAL0001215	R	C	7	7	35	43	630	39	33	2332	2754	2768	0.546596	0.569665	0.546596	0.959504	-0.296982	0.241008	0.53799	1
3851	orf19.3612	CAL0000303		CAL0000303	2	C	2	2	80	58	972	48	51	1635	606	619	-0.552216	0.575697	0.552216	0.959213	0.463947	-0.0874628	-0.55141	1
5254	orf19.1496	CAL0004781		CAL0004781	2	C	6	2	21	22	362	14	7	129	1356	1356	1.08249	1.1293	1.08249	0.958551	-0.0671142	1	1.06711	1
1652	orf19.2883	CAL0005221	CSO99	CAL0005221	4	C	5	5	182	157	1897	93	100	749	993	1167	-0.337776	0.352393	0.337776	0.958521	0.213174	-0.104697	-0.317871	1
5786	orf19.4723	CAL0004396		CAL0004396	1	C	-1	3	48	51	1474	122	99	1847	27	28	0.380452	0.397244	0.380452	0.957729	-0.0874628	0.301381	0.388844	1
2047	orf19.3294	CAL0003442	MBF1	CAL0003442	1	W	3	4	3157	3052	32199	4629	4007	80253	456	580	0.154726	0.161573	0.154726	0.957623	0.0487993	0.208178	0.159379	1
6025	orf19.4426	CAL0001784	SKP1	CAL0001784	1	C	15	10	321	331	2578	347	309	2092	1392	1484	0.215607	0.225377	0.215607	0.95665	-0.0442579	0.167329	0.211587	1
4121	orf19.2042	CAL0004408		CAL0004408	2	W	1	1	24	31	1825	7	18	1806	1500	1514	-0.972583	1.01807	0.972583	0.955318	-0.369234	-1.36257	-0.993336	1
5001	orf19.3051	CAL0001429		CAL0001429	1	W	5	5	455	414	5075	258	280	3164	882	983	-0.233337	0.244376	0.233337	0.954828	0.136236	-0.118056	-0.254292	1
854	orf19.5387	CAL0004411	SWD1	CAL0004411	3	W	11	9	33	37	1351	51	40	1002	4041	4057	0.569742	0.597596	0.569742	0.95339	-0.165059	0.350497	0.515556	1
5066	orf19.4088	CAL0004940	SGT1	CAL0004940	2	C	1	1	56	49	3207	95	111	6761	807	819	-0.424349	0.445577	0.424349	0.952358	0.192645	-0.22456	-0.417205	1
2836	orf19.1388	CAL0003945		CAL0003945	2	W	4	3	513	485	5986	1305	1363	17362	657	702	-0.140685	0.147822	0.140685	0.951719	0.0809741	-0.0627358	-0.14371	1
2362	orf19.905	CAL0003576	STP4	CAL0003576	2	W	4	3	128	162	2862	87	85	2582	1323	1337	0.390597	0.410628	0.390597	0.951219	-0.33985	0.0335526	0.373403	1
8	orf19.3468	CAL0005040		CAL0005040	6	C	4	4	54	88	3046	89	112	2055	1830	1837	0.37343	0.392791	0.37343	0.950709	-0.704544	-0.331621	0.372923	1
5244	orf19.4756	CAL0004483	NAR1	CAL0004483	1	W	6	4	28	32	584	15	10	562	1656	1653	0.924097	0.972611	0.924097	0.95012	-0.192645	0.584963	0.777608	1
1947	orf19.6283	CAL0000591		CAL0000591	R	W	4	3	292	240	3639	671	638	5881	789	803	-0.255317	0.269026	0.255317	0.949042	0.282934	0.0727563	-0.210178	1
3051	orf19.1039	CAL0001127	BET4	CAL0001127	1	C	-1	2	56	76	1690	22	19	1476	1104	1105	0.652659	0.688017	0.652659	0.948609	-0.440573	0.211504	0.652077	1
3852	orf19.2335	CAL0000724		CAL0000724	1	C	6	6	821	998	17733	688	760	18028	1491	1649	0.136357	0.14394	0.136357	0.947318	-0.281658	-0.143591	0.138067	1
6026	orf19.5242	CAL0003555	TRP3	CAL0003555	1	W	19	11	503	521	2922	633	564	4132	1446	1460	0.194207	0.20526	0.194207	0.946151	-0.050725	0.16651	0.217235	1
2796	orf19.1237	CAL0002883	ARO9	CAL0002883	4	C	10	7	14	15	262	30	54	658	1572	1572	-0.788783	0.833694	0.788783	0.94613	-0.0995357	-0.847997	-0.748461	1
2187	orf19.1944	CAL0002585	GPR1	CAL0002585	5	W	7	4	21	30	1107	51	104	1489	2472	2494	-0.508786	0.538008	0.508786	0.945685	-0.514573	-1.02801	-0.513441	1
3759	orf19.5827	CAL0002306	LHS1	CAL0002306	2	C	2	3	34	34	413	40	27	698	945	959	0.550842	0.582504	0.550842	0.945645	0	0.567041	0.567041	1
5425	orf19.4262	CAL0000283		CAL0000283	5	C	1	1	19	15	1071	33	15	2890	1443	1580	1.01193	1.07021	1.01193	0.945543	0.341037	1.1375	0.796467	1
5675	orf19.3680	CAL0000463		CAL0000463	1	W	10	9	408	351	4995	885	851	13269	2013	2319	-0.162552	0.171988	0.162552	0.945136	0.217098	0.0565183	-0.16058	1
4544	orf19.1597	CAL0005684	ABG1	CAL0005684	2	W	2	2	274	359	14916	243	277	12049	867	1036	0.189491	0.200538	0.189491	0.944913	-0.389808	-0.18893	0.200878	1
2432	orf19.6356	CAL0001343		CAL0001343	1	C	15	8	67	74	1477	113	157	2236	2739	2739	-0.332597	0.352131	0.332597	0.944526	-0.143364	-0.474442	-0.331078	1
61	orf19.2309	CAL0000652	PET127	CAL0000652	1	W	8	10	200	216	3284	216	293	4288	2118	2262	-0.305741	0.324121	0.305741	0.943293	-0.111031	-0.439869	-0.328838	1
3961	orf19.2573	CAL0002521	FRS1	CAL0002521	R	C	15	10	2968	2922	28394	8198	8558	69770	1779	1893	-0.085689	0.090949	0.085689	0.942165	0.0225349	-0.0620017	-0.0845366	1
1513	orf19.607	CAL0000882	CDC13	CAL0000882	R	C	5	4	71	54	1434	22	9	1726	3168	3177	0.930002	0.987276	0.930002	0.941988	0.39486	1.28951	0.894647	1
5170	orf19.6958	CAL0000311	USO6	CAL0000311	3	W	3	2	45	32	1020	65	33	750	1521	1536	0.5086	0.540076	0.5086	0.941719	0.491853	0.977974	0.486121	1
2323	orf19.4961	CAL0006359	RMP1	CAL0006359	1	W	7	7	260	183	3257	396	556	6889	1755	1920	-0.797606	0.847032	0.797606	0.941648	0.506668	-0.489584	-0.996252	1
1121	orf19.685	CAL0001136	CHL4	CAL0001136	6	W	5	4	606	609	7916	2087	1887	25253	915	931	0.155765	0.165419	0.155765	0.941639	-0.00712443	0.145336	0.152461	1
191	orf19.401	CAL0005536	PAN3	CAL0005536	1	W	1	1	87	114	17667	394	424	23666	1665	1762	0.276677	0.293936	0.276677	0.941283	-0.389947	-0.105869	0.284078	1
3658	orf19.155	CAL0003152	URE2	CAL0003152	2	C	2	2	185	237	3546	109	183	8257	1035	1051	-0.382502	0.406738	0.382502	0.940414	-0.357362	-0.747516	-0.390154	1
746	orf19.1078	CAL0001229	HBR2	CAL0001229	6	C	10	8	213	1125	6449	403	2506	10911	1278	1312	-0.25514	0.271548	0.25514	0.939576	-2.401	-2.63653	-0.235535	1
3974	orf19.2921	CAL0005987		CAL0005987	4	W	12	11	59	62	471	99	78	775	1509	1557	0.41259	0.439182	0.41259	0.939451	-0.0715533	0.343954	0.415508	1
3039	orf19.3919	CAL0002874		CAL0002874	5	C	4	4	51	50	1835	62	43	1026	2112	2126	0.499344	0.531923	0.499344	0.938752	0.0285692	0.527932	0.499362	1
3281	orf19.932	CAL0003657	AGA1	CAL0003657	5	W	17	13	165	168	3532	131	171	5499	5151	5172	-0.338105	0.360624	0.338105	0.937555	-0.0259952	-0.38443	-0.358434	1
3286	orf19.1238	CAL0002884	TUB4	CAL0002884	4	C	-1	8	119	160	1181	216	243	2199	3	4	0.259187	0.27657	0.259187	0.937148	-0.42711	-0.169925	0.257185	1
3611	orf19.3010.1	CAL0006505	ECM33	CAL0006505	1	C	-1	2	1082	921	64241	2366	1749	232390	12	13	0.204276	0.218222	0.204276	0.936093	0.232427	0.43592	0.203492	1
5982	orf19.1500	CAL0005377		CAL0005377	2	C	8	9	134	162	1726	140	207	2255	1527	1542	-0.298748	0.319269	0.298748	0.935725	-0.273761	-0.564204	-0.290443	1
4499	orf19.3087	CAL0001506	UBI3	CAL0001506	4	W	1	1	6008	6091	263524	5459	5899	525002	582	612	-0.094271	0.100881	0.094271	0.934477	-0.0197943	-0.111834	-0.0920394	1
2419	orf19.5260	CAL0003585		CAL0003585	1	W	1	1	146	178	15936	121	120	24936	2859	2995	0.29702	0.318152	0.29702	0.933579	-0.285909	0.0119726	0.297882	1
2318	orf19.2775	CAL0004272	IDI1	CAL0004272	4	W	7	6	969	1147	11377	1903	2052	21148	855	1066	0.133383	0.142895	0.133383	0.933434	-0.243297	-0.108755	0.134542	1
1087	orf19.5639	CAL0000622	CAR2	CAL0000622	4	C	11	9	539	370	8222	1341	1010	26193	2517	2545	-0.138441	0.148321	0.138441	0.933388	0.54276	0.408954	-0.133806	1
1915	orf19.2478.1	CAF0006953		CAF0006953	1	W	1	1	2260	2168	70396	22203	22513	831435	726	727	-0.077189	0.082779	0.077189	0.932471	0.059958	-0.0200037	-0.0799617	1
2296	orf19.1860.1	CAF0007418		CAF0007418	2	C	14	10	741	775	5082	906	868	7861	1401	1427	0.12357	0.132534	0.12357	0.932365	-0.0647228	0.061816	0.126539	1
3800	orf19.4142	CAL0005710	FYV5	CAL0005710	5	C	11	10	37	38	431	24	36	410	1509	1509	-0.55361	0.593784	0.55361	0.932342	-0.0384741	-0.584963	-0.546488	1
5154	orf19.319	CAL0004673			3	C	0	1	54	44	1273	132	142	2867	237	469	-0.439508	0.471565	0.439508	0.93202	0.295456	-0.105353	-0.400809	1
549	orf19.4335	CAL0000988	RPS5	CAL0000988	5	C	13	11	235	222	1700	113	86	994	1533	1572	0.305965	0.328376	0.305965	0.931752	0.0821011	0.393914	0.311813	1
5757	orf19.1613	CAL0006335	ILV2	CAL0006335	3	W	8	8	1392	1400	22929	2532	2363	49694	2052	2124	0.099997	0.107329	0.099997	0.931687	-0.00826762	0.0996578	0.107925	1
2663	orf19.334	CAL0004747	SOD2	CAL0004747	3	C	2	1	20	13	529	48	46	1634	573	585	-0.592818	0.637105	0.592818	0.930487	0.621488	0.0614005	-0.560088	1
3618	orf19.1509	CAL0005393	ROD1	CAL0005393	2	C	17	13	206	157	2840	393	351	4527	2775	2791	-0.222666	0.2394	0.222666	0.9301	0.39188	0.163058	-0.228821	1
4979	orf19.5228	CAL0003526		CAL0003526	1	C	4	4	375	382	6213	527	630	10816	624	890	-0.216724	0.233248	0.216724	0.929157	-0.026682	-0.257549	-0.230867	1
3888	orf19.5239	CAL0003544		CAL0003544	1	C	9	7	299	307	2934	470	551	6655	1416	1446	-0.194947	0.210082	0.194947	0.927957	-0.0380932	-0.229392	-0.191298	1
4112	orf19.3517	CAL0005814		CAL0005814	R	W	1	1	13	14	661	15	28	1722	840	854	-0.798755	0.862006	0.798755	0.926623	-0.106915	-0.900464	-0.793549	1
221	orf19.6640	CAL0004028	MCT1	CAL0004028	R	W	1	1	71	75	6274	402	318	12048	1437	1509	0.362468	0.391205	0.362468	0.926542	-0.0790716	0.338169	0.41724	1
3809	orf19.718	CAL0001746		CAL0001746	R	C	7	7	137	105	2532	34	36	769	2076	2082	-0.461129	0.498344	0.461129	0.925323	0.383787	-0.0824622	-0.466249	1
459	orf19.1133	CAL0001961	MSB1	CAL0001961	1	C	10	8	55	43	1239	156	96	3885	3864	3883	0.341923	0.369776	0.341923	0.924676	0.355095	0.70044	0.345345	1
3864	orf19.1058	CAL0001193		CAL0001193	1	W	2	2	223	169	4080	719	468	13219	834	835	0.210437	0.22787	0.210437	0.923496	0.40002	0.619483	0.219463	1
5095	orf19.6119	CAL0005965	ACE2	CAL0005965	R	C	9	7	118	105	1779	194	138	2237	2016	2030	0.28987	0.314479	0.28987	0.921747	0.168398	0.491388	0.322991	1
4713	orf19.542	CAL0000198		CAL0000198	R	W	9	6	6971	7569	92657	11569	11621	215508	1455	1643	0.109551	0.118911	0.109551	0.921286	-0.118737	-0.00647005	0.112267	1
5570	orf19.2452	CAL0001554		CAL0001554	1	C	6	2	102	186	3255	325	492	10525	1248	1315	0.276993	0.301249	0.276993	0.919482	-0.866733	-0.598219	0.268515	1
2423	orf19.220	CAL0003915	PIR1	CAL0003915	2	C	12	7	1614	1588	10379	4579	4205	38253	1041	1283	0.102283	0.111305	0.102283	0.918943	0.0234297	0.122927	0.0994971	1
3401	orf19.2041	CAL0004406		CAL0004406	2	C	12	11	260	305	2629	864	908	11745	1911	1980	0.162476	0.176822	0.162476	0.918868	-0.230298	-0.071661	0.158637	1
233	orf19.5755	CAL0001471	SNQ2	CAL0001471	6	W	7	5	82	68	909	15	7	544	1338	1357	0.954046	1.03839	0.954046	0.918772	0.270089	1.09954	0.829447	1
5293	orf19.4029	CAL0004731	PCL2	CAL0004731	5	W	1	1	38	61	9401	235	280	15944	1248	1263	0.433684	0.472992	0.433684	0.916895	-0.68281	-0.252766	0.430044	1
570	orf19.4368	CAL0001082		CAL0001082	R	W	6	6	54	51	1003	16	8	606	2211	2212	0.949982	1.03742	0.949982	0.915713	0.0824622	1	0.917538	1
4612	orf19.780	CAL0001974		CAL0001974	1	W	18	16	73	85	2266	44	66	1473	5442	5456	-0.380321	0.415346	0.380321	0.915673	-0.219566	-0.584963	-0.365396	1
4419	orf19.4912	CAL0006226		CAL0006226	1	C	17	13	124	128	1006	180	227	1745	1935	1943	-0.285279	0.311597	0.285279	0.915538	-0.0458037	-0.334695	-0.288892	1
3341	orf19.876	CAL0002859	ILV5	CAL0002859	2	W	2	2	89	68	1255	299	278	5161	741	796	-0.275674	0.30134	0.275674	0.914827	0.388271	0.105061	-0.28321	1
3047	orf19.6023	CAL0005070	ERG2	CAL0005070	1	W	11	9	50	40	556	95	57	942	1800	1818	0.42127	0.460899	0.42127	0.914018	0.321928	0.736966	0.415037	1
3285	orf19.4960	CAL0006358	STP2	CAL0006358	1	C	1	1	64	65	5495	99	125	5542	1035	1146	-0.314195	0.344212	0.314195	0.912795	-0.0223678	-0.336428	-0.31406	1
2617	orf19.931	CAL0003656		CAL0003656	5	W	3	3	66	65	2012	33	44	904	2085	2099	-0.438655	0.481338	0.438655	0.911324	0.0220263	-0.415037	-0.437064	1
902	orf19.1979	CAL0002676	GIT3	CAL0002676	5	C	9	6	365	338	3986	331	348	4996	1608	1659	-0.183005	0.20156	0.183005	0.907943	0.110873	-0.0722561	-0.183129	1
5541	orf19.1112	CAL0001875	BUD7	CAL0001875	5	C	7	6	236	233	5500	361	409	9903	2295	2319	-0.209462	0.230962	0.209462	0.906911	0.0184569	-0.180102	-0.198559	1
5621	orf19.6512	CAL0003072	RAD14	CAL0003072	7	C	3	2	52	30	1442	84	34	2773	2004	2015	0.544247	0.601779	0.544247	0.904397	0.793549	1.30485	0.511305	1
2766	orf19.3314	CAL0004070	TRS20	CAL0004070	1	C	1	1	26	24	550	30	17	1676	453	462	0.736152	0.814053	0.736152	0.904305	0.115477	0.819428	0.703951	1
2933	orf19.716	CAL0001743		CAL0001743	R	C	2	2	39	29	615	50	59	838	501	529	-0.691305	0.764626	0.691305	0.904109	0.427421	-0.238787	-0.666208	1
1630	orf19.2559	CAL0002484	CDC4	CAL0002484	R	C	5	6	232	217	6031	515	550	11525	2307	2812	-0.188511	0.209051	0.188511	0.901746	0.0964298	-0.0948592	-0.191289	1
2642	orf19.403	CAL0005537		CAL0005537	1	C	4	3	88	89	1573	241	200	2715	765	781	0.286331	0.3181	0.286331	0.900129	-0.0163018	0.269033	0.285335	1
4724	orf19.123	CAL0003031	RCN1	CAL0003031	6	W	8	6	81	85	634	185	159	1526	633	650	0.291279	0.323627	0.291279	0.900045	-0.0695409	0.218499	0.288039	1
277	orf19.3838	CAL0002038	SAP10	CAL0002038	4	C	-1	1	1868	1683	68877	8516	6626	510962	21	22	0.232134	0.258208	0.232134	0.899019	0.150459	0.362038	0.211578	1
291	orf19.4779	CAL0004562		CAL0004562	1	C	23	15	104	99	602	99	76	622	1863	1863	0.317861	0.353891	0.317861	0.898189	0.0710831	0.381429	0.310346	1
2206	orf19.3970	CAL0003091		CAL0003091	5	C	1	1	13	18	1276	32	28	2812	744	754	0.705749	0.785938	0.705749	0.89797	-0.469485	0.192645	0.66213	1
1304	orf19.4755	CAL0004481		CAL0004481	1	C	4	4	65	56	4215	90	100	4222	2811	2837	-0.367571	0.409621	0.367571	0.897344	0.215013	-0.152003	-0.367016	1
2089	orf19.3334	CAL0004119	RPS21	CAL0004119	1	C	0	1	5864	5580	244918	7144	6069	736859	750	994	0.172501	0.192243	0.172501	0.897307	0.07162	0.235273	0.163653	1
4725	orf19.437	CAL0005660		CAL0005660	1	W	2	2	293	321	27783	1264	1617	61464	1959	2160	-0.229251	0.255884	0.229251	0.895918	-0.131673	-0.355323	-0.223651	1
1832	orf19.526	CAL0000123	RPN2	CAL0000123	R	C	1	1	561	490	20651	2263	2234	60695	480	670	-0.177005	0.197638	0.177005	0.895602	0.195219	0.0186074	-0.176612	1
1736	orf19.2215	CAL0006189	GLE1	CAL0006189	2	C	4	3	33	36	1539	174	141	2468	1503	1515	0.45961	0.513359	0.45961	0.895299	-0.125531	0.303392	0.428923	1
2355	orf19.2896	CAL0005253	SOU1	CAL0005253	4	W	4	5	833	860	9314	514	476	8722	846	926	0.153214	0.171277	0.153214	0.894539	-0.0460202	0.110807	0.156827	1
3438	orf19.3955	CAL0003012		CAL0003012	5	C	5	4	574	594	16690	1414	1658	50925	2247	2307	-0.179237	0.200523	0.179237	0.893848	-0.0494122	-0.229662	-0.18025	1
1205	orf19.4435	CAL0001812	GPX3	CAL0001812	1	W	5	3	134	124	3396	71	84	6472	3912	3926	-0.342437	0.383485	0.342437	0.892961	0.111893	-0.24257	-0.354463	1
5372	orf19.2973	CAL0006105		CAL0006105	1	W	5	4	141	155	3108	363	491	11153	2040	2055	-0.277046	0.31054	0.277046	0.892143	-0.136573	-0.435753	-0.29918	1
2200	orf19.4533	CAL0002721		CAL0002721	1	C	15	12	182	184	1175	425	488	4762	1518	1527	-0.182598	0.20478	0.182598	0.891679	-0.0157673	-0.199418	-0.183651	1
3613	orf19.5241	CAL0003554	CDC6	CAL0003554	1	W	15	11	351	320	5453	315	332	5731	3006	3023	-0.20566	0.230816	0.20566	0.891013	0.133399	-0.0758314	-0.209231	1
2020	orf19.2304	CAL0000646		CAL0000646	1	C	5	5	554	522	6837	922	770	19597	1029	1071	0.181096	0.203273	0.181096	0.8909	0.0858362	0.259908	0.174072	1
6070	orf19.4205.1	CAF0007005		CAF0007005	6	C	1	1	53	68	1126	186	310	3622	261	276	-0.344148	0.387177	0.344148	0.888865	-0.359542	-0.736966	-0.377423	1
236	orf19.3556	CAL0005930	GPI19	CAL0005930	2	W	21	13	618	680	7317	819	987	14827	2847	2979	-0.132931	0.149694	0.132931	0.888018	-0.137928	-0.269187	-0.131259	1
1920	orf19.1037	CAL0001125		CAL0001125	1	C	9	8	64	95	752	50	98	774	1773	1785	-0.417813	0.470691	0.417813	0.887659	-0.569856	-0.970854	-0.400998	1
635	orf19.3064.1	CAL0120670		CAL0120670	1	W	1	1	14	25	377	54	69	724	240	254	0.615313	0.693409	0.615313	0.887374	-0.836501	-0.353637	0.482864	1
2728	orf19.5158	CAL0002595	DUG3	CAL0002595	7	W	1	1	70	56	1714	169	166	3485	519	556	-0.301781	0.34033	0.301781	0.886731	0.321928	0.02584	-0.296088	1
520	orf19.2006	CAL0004321		CAL0004321	2	C	6	4	102	99	1040	48	64	802	891	1016	-0.451995	0.510069	0.451995	0.886145	0.0430687	-0.415037	-0.458106	1
4736	orf19.2654	CAL0003473	RMS1	CAL0003473	5	W	12	8	225	170	3273	478	419	5970	1659	1673	-0.21289	0.240362	0.21289	0.885706	0.40439	0.19006	-0.21433	1
3110	orf19.6402	CAL0002103	GSH2	CAL0002103	R	W	3	4	986	984	27573	2579	2406	44904	1200	1440	0.105632	0.119291	0.105632	0.885498	0.00292933	0.100175	0.0972458	1
849	orf19.1840	CAL0001672		CAL0001672	1	C	-1	7	250	227	8779	433	447	15240	3648	3649	-0.182995	0.206699	0.182995	0.885321	0.139236	-0.0459078	-0.185144	1
1518	orf19.5201	CAL0003481		CAL0003481	1	C	4	3	840	830	6015	1323	1197	16641	603	638	0.128108	0.144713	0.128108	0.885256	0.017278	0.14439	0.127112	1
2256	orf19.4437	CAL0001816	RME1	CAL0001816	1	W	12	8	393	218	6098	1468	917	18065	3054	3055	-0.168197	0.190099	0.168197	0.884786	0.850201	0.678858	-0.171343	1
4396	orf19.4677	CAL0003793		CAL0003793	4	C	2	2	39	35	722	114	72	1622	711	740	0.473089	0.534717	0.473089	0.884747	0.156119	0.662965	0.506846	1
445	orf19.4952.1	CAF0007028		CAF0007028	1	W	2	1	259	238	5659	113	69	8437	456	457	0.511479	0.578192	0.511479	0.884618	0.121991	0.711655	0.589664	1
2121	orf19.232	CAL0003950		CAL0003950	3	C	6	4	95	131	1094	248	294	2471	915	945	0.232868	0.263494	0.232868	0.88377	-0.463567	-0.245476	0.218091	1
5925	orf19.4719	CAL0004381	CTR2	CAL0004381	4	W	5	6	281	254	6496	132	101	5166	2493	2568	0.23523	0.266265	0.23523	0.883443	0.145742	0.386183	0.240441	1
612	orf19.2204.2	CAF0006942	RHO2	CAF0006942	2	W	1	1	9	7	676	24	8	1329	564	578	1.40228	1.58753	1.40228	0.883311	0.36257	1.58496	1.22239	1
554	orf19.3159	CAL0002346	UTP20	CAL0002346	3	W	34	29	510	498	9405	668	590	10419	7506	7520	0.145923	0.165372	0.145923	0.882392	0.0343515	0.179133	0.144782	1
94	orf19.2115	CAL0005281		CAL0005281	2	C	11	9	566	638	5304	803	980	6726	1305	1337	-0.116324	0.131943	0.116324	0.881623	-0.172754	-0.287382	-0.114627	1
3206	orf19.6850	CAL0005790		CAL0005790	1	W	6	4	29	17	617	32	11	539	1734	1749	0.914257	1.03751	0.914257	0.881201	0.770518	1.54057	0.77005	1
860	orf19.763	CAL0001895	MCD1	CAL0001895	1	W	1	1	49	31	1423	214	168	7792	675	702	-0.314014	0.356816	0.314014	0.880045	0.660514	0.34915	-0.311364	1
1432	orf19.154	CAL0003149		CAL0003149	2	C	7	6	255	221	2516	461	339	4163	1086	1095	0.22236	0.252742	0.22236	0.87979	0.206451	0.443481	0.237031	1
3793	orf19.4635	CAL0003672		CAL0003672	4	W	6	6	927	890	32400	3725	3925	88942	2625	2789	-0.132046	0.150103	0.132046	0.879703	0.058764	-0.0754522	-0.134216	1
5972	orf19.3644	CAL0000403	CTR1	CAL0000403	6	C	13	12	120	136	1209	331	320	3637	2148	2171	0.227922	0.259092	0.227922	0.879695	-0.180572	0.0487593	0.229332	1
3050	orf19.1730	CAL0000827		CAL0000827	3	C	-1	4	175	211	2263	237	335	5672	6	7	-0.219789	0.250137	0.219789	0.878674	-0.269888	-0.499274	-0.229386	1
4355	orf19.3869	CAL0002127	GCR3	CAL0002127	R	W	16	10	365	299	3134	1864	1379	24122	1755	1914	0.150162	0.170959	0.150162	0.878351	0.287751	0.434779	0.147028	1
2366	orf19.1381	CAL0003939		CAL0003939	2	C	5	5	172	127	2532	194	169	3801	1395	1405	-0.240328	0.273764	0.240328	0.877866	0.43758	0.199033	-0.238547	1
328	orf19.4195.1	CAL0006519		CAL0006519	6	W	6	4	1173	775	6382	2438	1770	14608	453	454	-0.13542	0.154372	0.13542	0.877232	0.597935	0.461949	-0.135986	1
967	orf19.3458	CAL0005014		CAL0005014	6	W	3	4	246	155	2328	111	56	3576	546	573	0.334922	0.382234	0.334922	0.876222	0.66639	0.987061	0.320671	1
3218	orf19.4219	CAL0000102	SPT20	CAL0000102	5	C	13	9	233	210	2803	767	619	8198	2484	2485	0.159143	0.181675	0.159143	0.875976	0.149941	0.309287	0.159347	1
4585	orf19.903	CAL0003574	ROM2	CAL0003574	2	W	4	6	20789	20520	186602	33774	31048	330437	747	853	0.090773	0.103697	0.090773	0.875368	0.0187896	0.121413	0.102623	1
5034	orf19.5617	CAL0000566	FGR13	CAL0000566	6	W	9	9	159	138	1549	298	302	4183	1440	1454	-0.226754	0.25997	0.226754	0.872231	0.204358	-0.0192362	-0.223595	1
4319	orf19.1837	CAL0001658	TBP1	CAL0001658	1	W	1	1	170	224	8648	444	501	11453	717	748	0.232949	0.267203	0.232949	0.871805	-0.397964	-0.174251	0.223713	1
3328	orf19.1865	CAL0001732	MCS7	CAL0001732	2	C	9	8	558	386	4937	369	286	6014	1845	1894	-0.161489	0.185323	0.161489	0.871392	0.531664	0.367606	-0.164059	1
4574	orf19.4525	CAL0002692	HSP30	CAL0002692	1	W	7	6	266	199	2560	224	201	3354	1005	1054	-0.263546	0.302456	0.263546	0.871353	0.418658	0.156303	-0.262355	1
4217	orf19.4208	CAL0000064		CAL0000064	6	C	11	8	128	132	1635	179	152	2886	1695	1713	0.288902	0.331862	0.288902	0.870549	-0.0443941	0.235888	0.280282	1
2974	orf19.2468	CAL0001588		CAL0001588	1	W	14	10	8	23	87	5	6	25	921	921	1.2705	1.46033	1.2705	0.870006	-1.52356	-0.263034	1.26053	1
2684	orf19.4274	CAL0000320	RAD9	CAL0000320	5	W	1	1	5	18	3337	33	220	7411	1470	1485	-0.939675	1.08021	0.939675	0.869904	-1.848	-2.73697	-0.888969	1
447	orf19.5148	CAL0002580		CAL0002580	7	C	22	17	453	421	6220	353	291	4440	5073	5102	0.177756	0.204456	0.177756	0.86941	0.105691	0.278649	0.172958	1
5467	orf19.4203	CAL0000057		CAL0000057	6	W	8	6	286	284	6837	192	215	3920	1989	2045	-0.182641	0.210772	0.182641	0.866534	0.0101242	-0.16323	-0.173355	1
2103	orf19.3487	CAL0005094		CAL0005094	R	W	4	3	160	109	815	311	166	1126	336	459	0.328851	0.380161	0.328851	0.865031	0.553744	0.905731	0.351988	1
378	orf19.2739	CAL0004223		CAL0004223	4	C	25	13	415	397	2199	355	301	2196	1719	1734	0.172134	0.199375	0.172134	0.863368	0.0639723	0.238056	0.174083	1
1060	orf19.1486	CAL0004738		CAL0004738	2	C	1	1	18	31	603	104	117	2625	498	516	0.579634	0.671865	0.579634	0.862724	-0.784271	-0.169925	0.614346	1
5276	orf19.3141	CAL0002310		CAL0002310	4	C	9	9	399	480	6924	1206	1581	32933	2721	2799	-0.129399	0.150252	0.129399	0.861213	-0.266646	-0.390607	-0.123962	1
1719	orf19.1181	CAL0002126		CAL0002126	6	W	16	0	38	24	149	5	8	47	1089	1089	-1.23238	1.43273	1.23238	0.860159	0.662965	-0.678072	-1.34104	1
1530	orf19.2693	CAL0003548	GST2	CAL0003548	4	C	2	3	29	38	472	21	18	746	660	681	0.68628	0.798112	0.68628	0.859879	-0.389947	0.222392	0.612339	1
2320	orf19.4393	CAL0001178		CAL0001178	R	W	1	1	208	205	18392	1193	1336	144443	1404	1405	-0.173338	0.201585	0.173338	0.859875	0.0209596	-0.163326	-0.184286	1
1789	orf19.5607	CAL0000537	ARG3	CAL0000537	6	W	6	1	334	420	5896	922	1303	10657	942	957	-0.171314	0.199249	0.171314	0.859799	-0.330541	-0.498998	-0.168457	1
3337	orf19.1896	CAL0001828	SSC1	CAL0001828	2	W	4	3	1487	1259	60315	7315	5553	431297	1947	2208	0.14501	0.169221	0.14501	0.856927	0.240126	0.39759	0.157464	1
1158	orf19.3623	CAL0000340	MSU1	CAL0000340	2	W	12	10	164	121	3816	104	96	2241	3516	3529	-0.336783	0.393218	0.336783	0.856479	0.438689	0.115477	-0.323212	1
2901	orf19.801	CAL0002606		CAL0002606	2	W	24	16	227	232	2168	941	1075	6571	2661	2676	-0.160011	0.186977	0.160011	0.855779	-0.0314325	-0.19207	-0.160638	1
4744	orf19.247	CAL0003990		CAL0003990	3	C	3	3	22	25	468	20	35	676	735	755	-0.665118	0.777331	0.665118	0.855643	-0.184425	-0.807355	-0.62293	1
2111	orf19.2149	CAL0005350		CAL0005350	6	C	6	6	42	53	1547	43	73	1539	2274	2289	-0.436851	0.510609	0.436851	0.855549	-0.335603	-0.76356	-0.427957	1
4162	orf19.130	CAL0003067	VPS15	CAL0003067	6	C	31	19	236	213	1922	57	64	819	4614	4627	-0.320583	0.375289	0.320583	0.85423	0.147933	-0.16711	-0.315043	1
5771	orf19.5537	CAL0006147		CAL0006147	6	C	14	6	108	154	1204	117	139	1811	1302	1437	0.259053	0.303261	0.259053	0.854225	-0.511899	-0.248576	0.263323	1
272	orf19.3531	CAL0005871	MRPL10	CAL0005871	2	W	10	7	116	80	805	94	82	613	834	849	-0.350579	0.410604	0.350579	0.853813	0.536053	0.197037	-0.339016	1
2839	orf19.3130	CAL0002280		CAL0002280	4	W	5	4	234	269	3092	386	396	5113	822	832	0.160991	0.188591	0.160991	0.853652	-0.201098	-0.0368996	0.164198	1
4628	orf19.1963	CAL0002635	GDS1	CAL0002635	5	C	16	11	1303	1030	11881	2492	2108	16171	1524	1845	-0.095671	0.112101	0.095671	0.853436	0.339193	0.241429	-0.0977635	1
1586	orf19.2264	CAL0006318	OLE2	CAL0006318	2	C	5	4	140	110	2010	130	83	2483	1581	1617	0.286436	0.336062	0.286436	0.852331	0.347923	0.647328	0.299405	1
3095	orf19.451	CAL0005724	IFA4	CAL0005724	R	W	7	6	189	215	3616	386	390	12401	2478	2530	0.171808	0.201638	0.171808	0.852062	-0.18595	-0.0148733	0.171077	1
2555	orf19.2166	CAL0005394	VMA5	CAL0005394	2	W	7	6	862	874	8197	613	569	9413	1167	1224	0.126687	0.148742	0.126687	0.851723	-0.0199454	0.107458	0.127404	1
1064	orf19.1481	CAL0004733	HAP42	CAL0004733	2	C	17	10	94	138	1219	235	292	3403	2517	2529	0.243182	0.285811	0.243182	0.850849	-0.553936	-0.313308	0.240628	1
4722	orf19.3862	CAL0002120		CAL0002120	R	W	7	4	140	128	1755	139	151	1698	987	1001	-0.261576	0.307582	0.261576	0.850427	0.129283	-0.119464	-0.248747	1
5116	orf19.1607	CAL0006317	ALR1	CAL0006317	3	C	6	6	134	133	6482	194	225	5590	2790	2877	-0.221271	0.260235	0.221271	0.850274	0.0108068	-0.213868	-0.224675	1
4657	orf19.4757	CAL0004486		CAL0004486	1	W	4	4	70	53	2149	106	103	3254	1830	1855	-0.399237	0.469563	0.399237	0.850231	0.401363	0.0414199	-0.359943	1
3246	orf19.3312	CAL0004067		CAL0004067	1	W	5	4	225	219	6149	541	599	16460	1875	1890	-0.190644	0.224295	0.190644	0.84997	0.0389941	-0.146927	-0.185922	1
496	orf19.6211	CAL0000441	PGA63	CAL0000441	1	C	6	6	69	47	1103	179	150	3340	1656	1676	-0.302507	0.355925	0.302507	0.849918	0.553936	0.254997	-0.298939	1
5776	orf19.839	CAL0002720		CAL0002720	2	W	22	12	703	765	5336	258	315	2723	1884	1901	-0.166672	0.196193	0.166672	0.849531	-0.121935	-0.287981	-0.166046	1
3121	orf19.6891	CAL0005916		CAL0005916	2	C	-1	10	426	405	7154	1217	1047	17134	2619	2620	0.145633	0.171489	0.145633	0.849226	0.0729315	0.217068	0.144136	1
1366	orf19.245	CAL0003984	DDC1	CAL0003984	3	W	19	13	91	85	610	62	73	510	1467	1467	-0.330547	0.38968	0.330547	0.848252	0.0984037	-0.235628	-0.334032	1
2118	orf19.4702	CAL0004343		CAL0004343	4	C	12	5	48	42	411	12	26	216	2595	926	-0.417351	0.492066	0.417351	0.848161	0.192645	-1.11548	-1.30812	1
5586	orf19.5771	CAL0001510		CAL0001510	6	C	8	6	328	330	5476	1878	2075	28111	1590	1658	-0.135891	0.160441	0.135891	0.846984	-0.00877021	-0.143914	-0.135144	1
1069	orf19.4866	CAL0005436	SWE1	CAL0005436	1	C	19	9	75	104	934	298	348	2572	1794	1797	0.247723	0.292677	0.247723	0.846404	-0.471621	-0.223775	0.247846	1
3845	orf19.4720	CAL0004393		CAL0004393	1	W	4	3	192	104	1131	265	174	2251	489	515	-0.25992	0.307861	0.25992	0.844277	0.884523	0.606905	-0.277618	1
240	orf19.3449	CAL0004998		CAL0004998	6	W	9	7	250	264	4591	714	661	12068	2124	2141	0.183082	0.217294	0.183082	0.842554	-0.0786098	0.111274	0.189884	1
984	orf19.3150	CAL0002333	GRE2	CAL0002333	2	W	4	4	44	58	891	97	98	1316	1038	1132	0.390028	0.463225	0.390028	0.841984	-0.398549	-0.014797	0.383752	1
1743	orf19.5702	CAL0001355		CAL0001355	6	C	8	7	44	47	3110	38	55	3445	4803	4803	-0.449109	0.533442	0.449109	0.841908	-0.0951572	-0.533432	-0.438275	1
5549	orf19.2549	CAL0002468	SHP1	CAL0002468	R	C	3	4	307	257	6690	1057	1010	23940	1116	1177	-0.191295	0.227239	0.191295	0.841823	0.25647	0.0656201	-0.19085	1
281	orf19.5514	CAL0006090		CAL0006090	6	W	5	4	35	8	213	73	27	347	804	812	-0.712255	0.847011	0.712255	0.840904	2.12928	1.43494	-0.694346	1
1416	orf19.3859	CAL0002094	SAM4	CAL0002094	R	W	12	8	450	516	3914	591	749	7606	1227	1227	-0.13988	0.166352	0.13988	0.840868	-0.197446	-0.341808	-0.144362	1
2262	orf19.1301	CAL0003699		CAL0003699	4	W	3	3	144	171	2058	118	110	1379	495	542	0.330684	0.394139	0.330684	0.839003	-0.247928	0.101283	0.349211	1
2532	orf19.916	CAL0003605	RMT2	CAL0003605	R	C	3	3	152	182	2832	131	121	4179	777	817	0.343955	0.410443	0.343955	0.838009	-0.259867	0.11456	0.374427	1
1905	orf19.1387	CAL0003944		CAL0003944	2	C	8	6	224	232	1983	275	331	2620	885	950	-0.223028	0.266151	0.223028	0.837975	-0.0506261	-0.2674	-0.216774	1
6080	orf19.2269	CAL0006325		CAL0006325	2	W	4	4	617	728	8847	633	830	9772	738	844	-0.152056	0.181758	0.152056	0.836585	-0.238668	-0.390906	-0.152238	1
5731	orf19.5824	CAL0002301		CAL0002301	2	C	1	1	43	37	1366	12	19	2133	1062	1075	-0.826599	0.989195	0.826599	0.835628	0.216811	-0.662965	-0.879776	1
2755	orf19.4987	CAL0000016		CAL0000016	1	C	11	9	608	655	5262	1488	1484	13645	1350	1425	0.108041	0.129362	0.108041	0.835183	-0.107424	0.00388343	0.111307	1
5199	orf19.4909	CAL0006211	RPL42	CAL0006211	1	C	15	10	593	501	6437	942	870	9538	2199	2378	-0.130177	0.155992	0.130177	0.834511	0.243222	0.114712	-0.12851	1
4095	orf19.827	CAL0002683		CAL0002683	2	W	5	3	31	44	456	111	122	1117	657	658	0.395908	0.474797	0.395908	0.833847	-0.505235	-0.136321	0.368914	1
1841	orf19.3998	CAL0003177		CAL0003177	5	C	7	5	46	18	160	103	54	377	486	496	-0.433396	0.52016	0.433396	0.833197	1.35364	0.931613	-0.422024	1
2542	orf19.730	CAF0007423		CAF0007423	R	W	13	9	139	181	2019	141	213	3288	2640	2654	-0.216771	0.260168	0.216771	0.833196	-0.380905	-0.595158	-0.214253	1
3849	orf19.5566	CAL0006213		CAL0006213	6	C	20	9	345	308	1742	442	439	3110	1362	1397	-0.156353	0.187694	0.156353	0.833021	0.163666	0.00982543	-0.153841	1
2389	orf19.667.1	CAF0006907	MDJ1	CAF0006907	1	W	2	2	7333	8438	70698	41242	43281	399409	273	274	0.155692	0.186954	0.155692	0.832782	-0.202498	-0.0696195	0.132878	1
695	orf19.1646	CAL0000019		CAL0000019	3	W	9	8	299	289	4786	1303	1148	26125	2538	2541	0.134787	0.161971	0.134787	0.832167	0.049076	0.182714	0.133638	1
991	orf19.2898	CAL0005255		CAL0005255	4	C	2	1	20	19	993	23	11	952	1686	1686	0.962401	1.15683	0.962401	0.831929	0.0740006	1.06413	0.99013	1
4685	orf19.4433	CAL0001810		CAL0001810	1	C	14	10	31	34	304	62	90	1027	1971	1982	-0.403196	0.48479	0.403196	0.831692	-0.133267	-0.537657	-0.40439	1
3233	orf19.2050	CAL0004431		CAL0004431	2	C	4	4	62	89	1528	38	43	1415	1623	1644	0.362413	0.435818	0.362413	0.83157	-0.521537	-0.178337	0.3432	1
555	orf19.1774	CAL0000931		CAL0000931	2	W	19	9	149	392	1407	60	214	987	1143	1156	-0.400286	0.481658	0.400286	0.831059	-1.39554	-1.83458	-0.439035	1
2647	orf19.871	CAL0002848	COX6	CAL0002848	2	W	12	8	75	79	1488	46	36	623	3060	3060	0.435816	0.524949	0.435816	0.830206	-0.0749621	0.353637	0.428599	1
3125	orf19.3683	CAL0000466		CAL0000466	1	C	2	3	512	432	11170	892	827	26609	1140	1245	-0.135837	0.163826	0.135837	0.829154	0.245112	0.109156	-0.135956	1
4790	orf19.2494	CAL0001659		CAL0001659	1	W	11	7	100	71	957	136	117	1482	1467	1472	-0.275478	0.332381	0.275478	0.828802	0.494109	0.217098	-0.277011	1
6084	orf19.2363	CAL0000764		CAL0000764	R	W	5	3	565	570	4629	3713	4023	28894	546	779	-0.104728	0.12648	0.104728	0.82802	-0.0127111	-0.115686	-0.102975	1
433	orf19.4774	CAL0004550	CTA8	CAL0004550	1	W	16	8	141	123	902	76	53	489	1140	1140	0.331782	0.401407	0.331782	0.826548	0.197037	0.520007	0.32297	1
2444	orf19.1659	CAL0000044	ALG8	CAL0000044	3	W	8	6	118	88	1919	137	123	2813	1764	1836	-0.271483	0.328722	0.271483	0.825874	0.423211	0.155518	-0.267694	1
408	orf19.592	CAL0000364	ZCF31	CAL0000364	R	W	3	3	64	59	1489	41	28	992	1188	1251	0.436222	0.528237	0.436222	0.825807	0.117357	0.550197	0.43284	1
3063	orf19.2029	CAL0004366	RFC5	CAL0004366	2	C	6	5	397	331	3892	404	298	5587	1089	1103	0.193498	0.234346	0.193498	0.825694	0.262308	0.439043	0.176735	1
1238	orf19.1993	CAL0002740		CAL0002740	2	W	4	4	548	457	8103	1348	1225	11107	1242	1276	-0.120027	0.145448	0.120027	0.825223	0.261982	0.138039	-0.123943	1
1899	orf19.2772	CAL0004270	HOS3	CAL0004270	4	W	13	8	185	209	3558	200	268	2159	2142	2164	-0.22743	0.27576	0.22743	0.824739	-0.175978	-0.422233	-0.246255	1
1713	orf19.5155	CAL0002592		CAL0002592	7	C	10	9	157	193	2999	199	209	3064	2286	2317	0.22382	0.271541	0.22382	0.824259	-0.297836	-0.0707345	0.227102	1
1390	orf19.3168	CAL0002371	RPN8	CAL0002371	5	W	9	8	1028	1092	8394	2113	2421	20409	993	1051	-0.105421	0.12795	0.105421	0.823923	-0.0871326	-0.19631	-0.109178	1
302	orf19.5294	CAL0003677		CAL0003677	4	C	2	4	3448	3451	68157	3140	3440	148661	1140	1328	-0.118591	0.143981	0.118591	0.823657	-0.0012547	-0.131644	-0.130389	1
2326	orf19.374	CAL0004888	PGA23	CAL0004888	4	C	13	10	138	160	2110	149	144	2891	2379	2391	0.262043	0.31837	0.262043	0.823077	-0.213404	0.0492435	0.262647	1
4706	orf19.4641	CAL0003694		CAL0003694	4	W	6	4	406	487	8635	575	632	14191	1356	1376	0.124309	0.151094	0.124309	0.822726	-0.262442	-0.136363	0.126079	1
3450	orf19.3630	CAL0000367	STN1	CAL0000367	2	W	10	8	837	850	7026	913	1003	11364	1287	1301	-0.113894	0.138769	0.113894	0.820745	-0.0222352	-0.135635	-0.1134	1
1964	orf19.200	CAL0003866		CAL0003866	2	W	7	4	452	515	5362	998	1391	12490	582	707	-0.273631	0.333891	0.273631	0.819522	-0.18825	-0.479011	-0.290761	1
4905	orf19.4724	CAL0004398	SWI6	CAL0004398	1	C	5	5	145	141	1719	198	164	2254	771	786	0.22452	0.274606	0.22452	0.817608	0.0403577	0.271805	0.231447	1
6117	orf19.3142	CAL0002311		CAL0002311	4	W	6	5	67	58	860	110	125	1296	1200	1214	-0.337457	0.412772	0.337457	0.817538	0.208108	-0.184425	-0.392533	1
830	orf19.1444	CAL0004592		CAL0004592	2	W	1	1	17	32	2435	87	114	11059	1569	1584	0.480194	0.58761	0.480194	0.817198	-0.912537	-0.389947	0.522591	1
6011	orf19.6636	CAL0004014		CAL0004014	R	C	3	3	48	38	952	114	113	2471	996	1001	-0.316822	0.387783	0.316822	0.817008	0.337035	0.0127111	-0.324324	1
6182	orf19.267	CAL0004042		CAL0004042	3	C	15	15	271	265	3044	611	536	8913	3642	3888	0.158012	0.19372	0.158012	0.815672	0.0323005	0.188939	0.156639	1
2239	orf19.1674	CAL0000107	CDC53	CAL0000107	3	W	5	6	225	273	6464	188	264	9474	2259	2331	-0.21303	0.261259	0.21303	0.815398	-0.278976	-0.489805	-0.210829	1
4639	orf19.1113	CAL0001877		CAL0001877	5	C	14	7	201	171	1084	322	315	1709	768	782	-0.202672	0.249288	0.202672	0.813003	0.233199	0.0317089	-0.20149	1
1482	orf19.3223	CAL0003252	ATP3	CAL0003252	R	W	4	4	3356	3846	52297	5025	5409	136971	885	886	0.088594	0.109117	0.088594	0.811917	-0.196616	-0.106238	0.0903777	1
1011	orf19.2340	CAL0000732	CDC48	CAL0000732	1	W	5	5	810	581	28317	5006	3340	133472	2481	2682	0.107108	0.131962	0.107108	0.811658	0.479384	0.58381	0.104426	1
3890	orf19.2009	CAL0004324	PEX12	CAL0004324	2	W	8	7	116	101	1304	134	96	893	1401	1415	0.289754	0.357214	0.289754	0.81115	0.19977	0.481127	0.281357	1
5149	orf19.5864	CAL0002407	WSC1	CAL0002407	3	C	7	6	144	142	2868	374	423	4586	1638	1652	-0.193683	0.238934	0.193683	0.810613	0.0201779	-0.177619	-0.197797	1
3476	orf19.2436	CAL0001525		CAL0001525	1	C	6	5	93	94	2558	68	54	4797	2649	2692	0.340093	0.421599	0.340093	0.806674	-0.01543	0.332575	0.348005	1
463	orf19.5184	CAL0002697	CHS1	CAL0002697	7	W	4	3	240	293	8825	777	862	18904	1482	1500	0.139404	0.172819	0.139404	0.806647	-0.287866	-0.149773	0.138093	1
4755	orf19.4513	CAL0002652		CAL0002652	2	W	12	8	628	575	4804	357	294	3706	1191	1205	0.159035	0.197175	0.159035	0.806568	0.127203	0.280108	0.152905	1
4410	orf19.6629	CAL0003997	ACO2	CAL0003997	R	C	4	3	30	35	715	51	44	1062	1317	1331	0.428539	0.532271	0.428539	0.805114	-0.222392	0.212994	0.435386	1
2058	orf19.4420	CAL0001777		CAL0001777	4	C	22	12	94	145	780	40	46	666	2403	2403	0.401449	0.498717	0.401449	0.804964	-0.62532	-0.201634	0.423686	1
1975	orf19.1566	CAL0005566	UTP21	CAL0005566	2	W	8	7	480	268	10625	1092	557	19325	2829	2880	0.130813	0.162538	0.130813	0.804815	0.840801	0.971224	0.130422	1
654	orf19.5064	CAL0001720		CAL0001720	1	C	2	2	206	203	5706	236	190	13363	1215	1255	0.317032	0.394188	0.317032	0.804266	0.0211646	0.312787	0.291623	1
3583	orf19.3665	CAL0000436		CAL0000436	1	W	10	9	191	193	1518	202	173	2068	1140	1203	0.233988	0.291057	0.233988	0.803925	-0.0150282	0.223583	0.238611	1
3083	orf19.1632	CAL0006399		CAL0006399	3	C	3	3	123	99	2741	118	76	2876	1218	1430	0.332964	0.41442	0.332964	0.803446	0.313158	0.634716	0.321558	1
4520	orf19.163	CAL0003183	PAN6	CAL0003183	R	W	3	3	171	160	5169	152	174	8118	951	966	-0.29676	0.369802	0.29676	0.802483	0.0959244	-0.195016	-0.29094	1
3178	orf19.5142	CAL0002575	TIM54	CAL0002575	7	C	3	2	25	24	293	96	69	1002	579	588	0.418518	0.52221	0.418518	0.801436	0.0588937	0.476438	0.417544	1
2488	orf19.3062	CAL0001454		CAL0001454	1	W	27	21	207	186	2026	157	166	1842	3540	3544	-0.230005	0.287039	0.230005	0.801302	0.154328	-0.0804187	-0.234747	1
4027	orf19.4192.1	CAF0007447		CAF0007447	6	C	-1	4	257	195	1406	566	514	2608	462	463	-0.31746	0.396311	0.31746	0.801038	0.398294	0.139034	-0.259261	1
5489	orf19.3965	CAL0003053	CRH12	CAL0003053	5	C	2	2	52	60	749	123	111	1994	651	754	0.360935	0.450666	0.360935	0.800892	-0.206451	0.148099	0.35455	1
1294	orf19.933	CAL0003658		CAL0003658	5	W	4	5	534	516	3135	511	548	7343	510	628	-0.14955	0.187324	0.14955	0.798349	0.0494687	-0.100853	-0.150321	1
4383	orf19.2257	CAL0006296		CAL0006296	2	W	7	6	1135	876	11230	1316	1134	15667	1104	1105	-0.150744	0.188855	0.150744	0.7982	0.37369	0.214739	-0.158951	1
4879	orf19.3125	CAL0002265		CAL0002265	4	W	2	2	63	73	1997	181	163	2153	777	791	0.345297	0.433351	0.345297	0.796807	-0.212545	0.151118	0.363662	1
608	orf19.548	CAL0000214	SER1	CAL0000214	R	C	4	4	759	731	10218	690	742	17372	1074	1129	-0.152454	0.191353	0.152454	0.796716	0.0542285	-0.104823	-0.159051	1
5615	orf19.4206	CAL0000062	RAD52	CAL0000062	6	W	4	3	18	15	592	47	57	1604	1845	1860	-0.528269	0.663201	0.528269	0.796544	0.263034	-0.278301	-0.541336	1
918	orf19.1610	CAL0006330		CAL0006330	3	W	13	3	37	31	224	30	16	154	1152	1147	0.645169	0.810693	0.645169	0.795824	0.255257	0.906891	0.651634	1
2956	orf19.5666	CAL0000694	TFB3	CAL0000694	4	W	1	1	82	59	2999	218	131	6823	441	467	0.262093	0.329494	0.262093	0.795441	0.474909	0.734761	0.259852	1
6096	orf19.1888	CAL0001797		CAL0001797	2	C	4	4	55	67	744	33	29	1164	993	1005	0.525664	0.661499	0.525664	0.794656	-0.284729	0.186413	0.471143	1
296	orf19.3795	CAL0001311	DCR1	CAL0001311	4	C	8	8	141	64	1174	88	52	778	1542	1542	-0.360278	0.453857	0.360278	0.793814	1.13955	0.758992	-0.380559	1
5829	orf19.889	CAL0002907	PGA17	CAL0002907	2	W	4	5	87	77	797	23	30	483	1647	1885	-0.587629	0.740396	0.587629	0.793669	0.176157	-0.383329	-0.559486	1
1778	orf19.2512	CAL0002381		CAL0002381	3	W	2	2	80	97	1268	89	84	2994	660	679	0.368198	0.463954	0.368198	0.793609	-0.277985	0.083416	0.361401	1
4664	orf19.1995	CAL0002742	MNN24	CAL0002742	2	C	8	6	120	124	2622	72	90	1615	2130	2144	-0.285136	0.359666	0.285136	0.79278	-0.0473057	-0.321928	-0.274622	1
3933	orf19.2172	CAL0005411	ARA1	CAL0005411	2	W	1	1	82	83	5294	21	35	4483	981	1003	-0.696936	0.879391	0.696936	0.792521	-0.0174874	-0.736966	-0.719478	1
213	orf19.2706	CAL0004169	CRH11	CAL0004169	4	C	2	3	68	107	2918	197	263	19679	1362	1409	0.240266	0.303174	0.240266	0.792502	-0.654004	-0.416867	0.237137	1
4161	orf19.4195	CAL0005892	FCA1	CAL0005892	6	W	11	5	17	44	99	35	65	234	399	413	0.500497	0.631928	0.500497	0.792016	-1.37197	-0.893085	0.478884	1
3389	orf19.3230	CAL0003275	BOI2	CAL0003275	R	C	10	9	247	245	4688	541	483	12323	3519	3528	0.155896	0.197108	0.155896	0.790917	0.0117293	0.163605	0.151876	1
760	orf19.3951	CAL0003009	SRP101	CAL0003009	5	C	2	2	122	140	2933	89	85	4404	756	770	0.272722	0.344943	0.272722	0.790629	-0.198546	0.0663425	0.264888	1
6048	orf19.1096	CAL0001282		CAL0001282	6	W	17	9	174	208	1766	98	96	1258	2640	2654	0.28597	0.361903	0.28597	0.790184	-0.257496	0.0297473	0.287244	1
4617	orf19.3083	CAL0001501		CAL0001501	4	C	13	8	131	167	1125	198	220	1443	1203	1203	0.202771	0.256817	0.202771	0.789554	-0.350281	-0.152003	0.198278	1
1722	orf19.756	CAL0001866	DPB2	CAL0001866	1	W	12	10	44	13	289	80	32	678	1767	1780	-0.492634	0.62426	0.492634	0.789149	1.75899	1.32193	-0.437064	1
5749	orf19.6324	CAL0001289	HET1	CAL0001289	6	C	7	3	184	136	6686	675	563	12819	2238	2255	-0.171612	0.217542	0.171612	0.788868	0.436099	0.261753	-0.174347	1
4529	orf19.2889	CAL0005227		CAL0005227	4	W	3	2	66	41	543	256	207	4538	414	487	-0.367847	0.466558	0.367847	0.788427	0.686842	0.306513	-0.380329	1
4191	orf19.6018	CAL0005049	NRM1	CAL0005049	1	W	21	12	298	419	3423	620	785	5353	2097	2123	0.143962	0.183066	0.143962	0.786394	-0.491638	-0.340424	0.151213	1
898	orf19.6625	CAL0003986		CAL0003986	R	C	3	3	197	206	3401	227	285	6620	828	852	-0.247335	0.315035	0.247335	0.785103	-0.0644487	-0.32827	-0.263821	1
2122	orf19.1681	CAL0000147		CAL0000147	3	W	6	5	46	64	403	99	103	596	561	575	0.398877	0.508072	0.398877	0.78508	-0.476438	-0.0571439	0.419294	1
4642	orf19.606	CAL0000880		CAL0000880	R	W	5	4	90	88	1787	36	45	2391	1917	1930	-0.385362	0.490941	0.385362	0.784946	0.0324215	-0.321928	-0.35435	1
2829	orf19.5147	CAL0002579	CYR1	CAL0002579	7	W	9	6	286	305	3358	541	646	8051	1845	1846	-0.15782	0.201162	0.15782	0.784542	-0.0927941	-0.255906	-0.163111	1
446	orf19.4929	CAL0006262	RPL15A	CAL0006262	1	W	18	14	210	198	2998	160	129	2079	3525	3543	0.233237	0.297465	0.233237	0.784082	0.0848889	0.310701	0.225812	1
4414	orf19.6255	CAL0000515		CAL0000515	1	W	10	9	104	75	901	265	233	1866	1314	1374	-0.27722	0.353743	0.27722	0.783676	0.471621	0.185662	-0.285959	1
3634	orf19.3127	CAL0002268	CZF1	CAL0002268	4	C	5	4	12	16	265	117	116	1521	1158	1166	0.459334	0.586277	0.459334	0.783476	-0.415037	0.0123837	0.427421	1
2812	orf19.4523	CAL0002688	ZCF24	CAL0002688	1	W	6	3	83	75	679	106	120	1283	624	639	-0.338557	0.433223	0.338557	0.781484	0.146221	-0.17897	-0.325191	1
1066	orf19.418	CAL0005582	SEC72	CAL0005582	1	W	11	11	98	98	3077	108	89	2887	4299	4348	0.280405	0.359104	0.280405	0.780846	0	0.279154	0.279154	1
4895	orf19.4739	CAL0004436		CAL0004436	1	C	16	13	1051	1053	8467	2488	2341	24338	2007	2029	0.088991	0.113985	0.088991	0.780726	-0.00274277	0.0878616	0.0906043	1
3361	orf19.2256	CAL0006295		CAL0006295	2	W	7	4	387	339	3292	801	637	7383	693	782	0.143414	0.183701	0.143414	0.780693	0.191048	0.330509	0.139461	1
4955	orf19.4897	CAL0005528		CAL0005528	1	C	3	3	235	202	4782	566	427	9058	963	1056	0.188611	0.241747	0.188611	0.7802	0.218305	0.406566	0.188261	1
3780	orf19.4769	CAL0004527		CAL0004527	1	W	11	10	157	132	1102	115	114	1389	1545	1707	-0.249206	0.319563	0.249206	0.779834	0.250227	0.0126	-0.237627	1
3677	orf19.2557	CAL0002482	SEC65	CAL0002482	R	C	8	8	488	434	3250	2263	2196	13113	828	866	-0.12408	0.159199	0.12408	0.779402	0.169186	0.0433585	-0.125828	1
63	orf19.2510	CAL0002377		CAL0002377	3	C	11	8	145	151	2298	34	26	609	2991	2991	0.456289	0.586003	0.456289	0.778646	-0.0584956	0.387023	0.445519	1
330	orf19.834	CAL0002714		CAL0002714	2	C	15	14	187	156	1715	106	106	1253	2529	2538	-0.26241	0.337062	0.26241	0.778521	0.261492	0	-0.261492	1
3100	orf19.406	CAL0005541	ARO4	CAL0005541	1	C	5	7	1392	1572	23033	1143	1196	21955	1491	1809	0.109747	0.140973	0.109747	0.778497	-0.175442	-0.065392	0.11005	1
4980	orf19.4019	CAL0004687		CAL0004687	5	W	5	4	25	63	386	52	100	770	621	634	0.387249	0.497658	0.387249	0.778143	-1.33342	-0.943416	0.390007	1
4363	orf19.1770	CAL0000927	CYC1		2	W	0	2	2077	2134	40810	20	14	253417	333	681	0.493526	0.634531	0.493526	0.777781	-0.039059	0.514573	0.553632	1
5130	orf19.5595	CAL0006287		CAL0006287	6	W	20	12	1144	1017	5752	876	841	6951	1560	1604	-0.115804	0.148946	0.115804	0.77749	0.169767	0.0588251	-0.110942	1
5133	orf19.5629	CAL0000596		CAL0000596	6	C	0	2	1301	902	32221	14	6	70857	384	611	0.80478	1.03586	0.80478	0.776923	0.528422	1.22239	0.693971	1
1277	orf19.3929	CAL0002913	APS3	CAL0002913	5	W	8	5	124	137	1840	186	167	1758	1038	1052	0.264023	0.339987	0.264023	0.776568	-0.143836	0.155455	0.29929	1
5037	orf19.4450.2	CAL0120763	RIA1	CAL0120763	1	W	1	1	29	41	462	73	79	1475	243	266	0.370032	0.477175	0.370032	0.775464	-0.499571	-0.113956	0.385615	1
957	orf19.6134	CAL0006007		CAL0006007	R	W	19	14	298	298	3154	228	203	2306	2454	2462	0.168552	0.217612	0.168552	0.774553	0	0.167554	0.167554	1
4670	orf19.2708	CAL0004172		CAL0004172	4	C	2	2	331	283	3255	255	251	7291	768	806	-0.199331	0.257498	0.199331	0.774107	0.226029	0.0228099	-0.203219	1
4362	orf19.5553	CAL0006179	MNN4-4	CAL0006179	6	W	5	4	248	231	1922	265	280	3031	528	601	-0.194913	0.25221	0.194913	0.77282	0.102447	-0.0794345	-0.181882	1
3770	orf19.4758	CAL0004489	COX5	CAL0004489	1	W	3	3	433	324	7410	1756	1209	24157	744	899	0.117384	0.151916	0.117384	0.77269	0.418373	0.538479	0.120105	1
2363	orf19.511	CAL0000077	OPY2	CAL0000077	R	W	3	4	218	161	2634	225	194	2537	729	800	-0.223347	0.289295	0.223347	0.772039	0.437267	0.213868	-0.223399	1
3292	orf19.6285	CAL0000595	AAT21	CAL0000595	R	W	2	2	127	116	4134	541	424	32963	993	1009	0.242592	0.31423	0.242592	0.77202	0.130704	0.351564	0.220861	1
611	orf19.6952	CAL0000298	DAL9	CAL0000298	3	W	9	8	156	136	1935	89	96	1819	2010	2024	-0.317198	0.411509	0.317198	0.770817	0.197939	-0.109229	-0.307168	1
3358	orf19.2771	CAL0004269	BEM3	CAL0004269	4	W	12	7	200	184	2629	80	90	3155	3426	3439	-0.284748	0.369629	0.284748	0.770362	0.120294	-0.169925	-0.290219	1
4415	orf19.1193	CAL0002160	GNP1	CAL0002160	6	C	6	7	826	952	13558	1307	1392	21862	1740	1868	0.116091	0.150753	0.116091	0.770074	-0.20482	-0.0909001	0.11392	1
2078	orf19.501	CAL0000046	DIM1	CAL0000046	R	W	17	13	1017	1110	9954	3459	3575	37403	1857	1872	0.079743	0.103553	0.079743	0.770069	-0.12624	-0.0475882	0.0786518	1
2199	orf19.768	CAL0001907		CAL0001907	1	C	17	11	80	110	1429	56	95	1116	2964	2996	-0.296982	0.385958	0.296982	0.769467	-0.459432	-0.762501	-0.303069	1
5985	orf19.4539	CAL0002733	SFL1	CAL0002733	1	C	2	2	16	28	518	11	31	513	555	640	-0.77831	1.01205	0.77831	0.76904	-0.807355	-1.49476	-0.68741	1
1641	orf19.2646	CAL0003461	ZCF13	CAL0003461	5	C	4	3	46	66	961	18	16	970	3729	3729	0.744677	0.968598	0.744677	0.768819	-0.520832	0.169925	0.690757	1
4924	orf19.528	CAL0000129	MUP1	CAL0000129	R	C	3	3	386	439	18196	509	525	30668	2859	2942	0.135195	0.175896	0.135195	0.768608	-0.18562	-0.0446518	0.140968	1
4347	orf19.2859	CAL0005156	SRP40	CAL0005156	R	C	6	2	165	172	5420	919	807	32720	1287	1317	0.234024	0.304522	0.234024	0.768496	-0.0599425	0.187496	0.247439	1
6009	orf19.6240	CAL0000492		CAL0000492	1	W	12	11	215	263	2374	535	594	4762	1584	1845	0.148558	0.193369	0.148558	0.768262	-0.290726	-0.150924	0.139802	1
3479	orf19.1159	CAL0002052		CAL0002052	1	C	11	10	224	256	1965	187	244	2486	1521	1533	-0.185155	0.241047	0.185155	0.768128	-0.192645	-0.383843	-0.191198	1
4933	orf19.1823	CAL0001626		CAL0001626	1	W	4	2	32	35	1068	7	13	1222	2742	2755	-0.745871	0.971537	0.745871	0.767723	-0.129283	-0.893085	-0.763802	1
5834	orf19.1396	CAL0003973		CAL0003973	2	W	4	5	145	154	2044	473	444	9818	1164	1460	0.179355	0.233835	0.179355	0.767015	-0.0868775	0.0912805	0.178158	1
5599	orf19.1116	CAL0001882		CAL0001882	5	C	9	5	222	203	1339	281	223	1793	627	664	0.207657	0.27128	0.207657	0.765471	0.12908	0.333526	0.204446	1
5677	orf19.5587	CAL0006265	FGR14	CAL0006265	6	C	21	11	40	53	220	23	21	115	1401	1401	0.50965	0.665895	0.50965	0.765361	-0.405992	0.131245	0.537237	1
781	orf19.4808	CAL0005296	ERG12	CAL0005296	1	C	30	22	796	802	7572	798	737	9662	4929	4966	0.12925	0.168886	0.12925	0.765309	-0.0108338	0.114724	0.125558	1
3552	orf19.2864.1	CAF0006966	RPL28	CAF0006966	R	C	-1	2	12771	12132	132528	39074	38710	560554	126	127	-0.06007	0.078512	0.06007	0.765106	0.0740541	0.0135026	-0.0605514	1
2924	orf19.1673	CAL0000106	PPT1	CAL0000106	3	C	2	2	91	125	5203	89	102	6007	1695	1714	0.271925	0.355561	0.271925	0.764777	-0.45799	-0.196692	0.261298	1
1283	orf19.119	CAL0003003		CAL0003003	6	C	9	6	173	169	1325	198	163	1157	798	811	0.232452	0.304059	0.232452	0.764496	0.0337488	0.280628	0.24688	1
1219	orf19.4114	CAL0005590		CAL0005590	2	W	8	7	26	17	351	33	14	594	2154	2167	0.657742	0.86159	0.657742	0.763405	0.612977	1.23704	0.624062	1
1490	orf19.3434	CAL0004960		CAL0004960	6	C	-1	2	7	5	261	7	10	322	2976	2970	-1.09067	1.42903	1.09067	0.763225	0.485427	-0.514573	-1	1
4087	orf19.1626	CAL0006376		CAL0006376	3	C	6	4	1024	770	13060	1976	1604	21357	1140	1178	-0.10961	0.143751	0.10961	0.762499	0.411285	0.300909	-0.110377	1
5517	orf19.3022	CAL0001364		CAL0001364	1	W	1	1	107	153	9927	215	253	18310	933	1036	0.274034	0.359392	0.274034	0.762493	-0.515921	-0.234801	0.28112	1
1107	orf19.3330	CAL0004109	CRL1	CAL0004109	1	C	4	3	112	123	1620	179	167	2840	1041	1054	0.239223	0.313821	0.239223	0.762291	-0.13516	0.100111	0.235271	1
4399	orf19.1219	CAL0002798		CAL0002798	6	W	2	3	81	76	905	217	236	4010	1203	1473	-0.221535	0.291105	0.221535	0.761014	0.0919225	-0.121092	-0.213014	1
1212	orf19.2369	CAL0000773		CAL0000773	R	W	6	5	145	159	2773	188	177	2058	1491	1540	0.216009	0.284295	0.216009	0.759806	-0.132974	0.0869833	0.219957	1
5918	orf19.1595	CAL0005682		CAL0005682	4	W	10	9	89	63	789	200	57	914	1707	1718	0.913987	1.20294	0.913987	0.759796	0.498454	1.81097	1.31251	1
1420	orf19.6951	CAL0000297	HBR3	CAL0000297	3	W	7	5	161	176	4284	201	190	2410	1770	1784	0.222678	0.293174	0.222678	0.759542	-0.128515	0.0811961	0.209711	1
5383	orf19.846	CAL0002752		CAL0002752	2	C	22	12	181	170	1922	244	201	2654	2892	2904	0.19294	0.254626	0.19294	0.757739	0.090455	0.279686	0.189231	1
3985	orf19.4109	CAL0005560		CAL0005560	2	W	5	6	637	547	16055	473	367	15649	2268	2402	0.147061	0.194239	0.147061	0.757114	0.219753	0.36606	0.146308	1
3	orf19.1373	CAL0003909	INP51	CAL0003909	2	C	14	6	46	53	935	56	50	857	2961	2973	0.365642	0.483024	0.365642	0.756985	-0.204358	0.163499	0.367857	1
6067	orf19.2168.3	CAF0006937		CAF0006937	2	C	-1	4	2077	2172	15717	4466	4963	43333	471	472	-0.088254	0.116619	0.088254	0.756772	-0.0645229	-0.152229	-0.0877063	1
2448	orf19.2985	CAL0006131		CAL0006131	1	C	2	2	72	57	1122	244	238	3674	519	574	-0.276079	0.364875	0.276079	0.75664	0.337035	0.0359196	-0.301115	1
5124	orf19.2563	CAL0002502		CAL0002502	R	C	19	12	192	205	2058	134	165	2188	2748	2763	-0.209629	0.277079	0.209629	0.756568	-0.0945176	-0.300233	-0.205715	1
4233	orf19.326	CAL0004708		CAL0004708	3	W	2	1	60	57	1543	36	44	1189	456	470	-0.361435	0.477936	0.361435	0.756241	0.0740006	-0.289507	-0.363507	1
2092	orf19.6277	CAL0000572		CAL0000572	1	W	24	13	31	41	412	31	54	534	3357	3360	-0.452238	0.598073	0.452238	0.756159	-0.403356	-0.800691	-0.397335	1
857	orf19.6846	CAL0005766	ELC1	CAL0005766	1	C	-1	4	332	318	5642	309	337	7529	15	16	-0.189083	0.250159	0.189083	0.755851	0.0621565	-0.125142	-0.187298	1
1185	orf19.4367	CAL0001080		CAL0001080	R	C	21	12	285	342	4467	492	535	8694	3723	3750	0.140348	0.1857	0.140348	0.755778	-0.263034	-0.120881	0.142154	1
1003	orf19.3737	CAL0001179	PGA22	CAL0001179	R	C	8	8	56	62	1394	107	147	1858	2382	2439	-0.312432	0.413634	0.312432	0.755334	-0.146841	-0.458205	-0.311364	1
5593	orf19.1352	CAL0003855	TIM22	CAL0003855	2	W	6	5	224	239	1259	688	672	3935	555	570	0.143937	0.191086	0.143937	0.753258	-0.0935119	0.0339473	0.127459	1
2222	orf19.5221	CAL0003519		CAL0003519	1	W	22	17	98	107	1583	230	218	1806	2952	2967	0.217285	0.288491	0.217285	0.753178	-0.126757	0.0773057	0.204063	1
4960	orf19.1702	CAL0000758	ARF3	CAL0000758	3	W	1	1	73	89	3145	128	126	7175	528	529	0.328831	0.436596	0.328831	0.75317	-0.285909	0.0227201	0.308629	1
4325	orf19.6650	CAL0004055		CAL0004055	R	C	1	1	12	18	612	15	40	751	576	578	-0.96136	1.27847	0.96136	0.751963	-0.584963	-1.41504	-0.830075	1
5167	orf19.697	CAL0001171	SMI1B	CAL0001171	R	W	3	3	101	76	2745	55	33	1980	1347	1361	0.335314	0.44613	0.335314	0.751606	0.410284	0.736966	0.326682	1
3766	orf19.1494	CAL0004779	RAD23	CAL0004779	2	W	6	5	747	858	11947	2642	3216	47834	1254	1255	-0.083725	0.111608	0.083725	0.75017	-0.199869	-0.283637	-0.0837675	1
2406	orf19.4411	CAL0001747		CAL0001747	4	C	7	4	28	27	438	36	26	238	1311	1311	0.444035	0.592023	0.444035	0.75003	0.0524674	0.469485	0.417018	1
851	orf19.3469	CAL0005041	RSN1	CAL0005041	6	W	2	3	40	67	1712	108	151	6851	1188	1264	0.309396	0.412722	0.309396	0.749647	-0.744161	-0.483517	0.260644	1
929	orf19.4666	CAL0003757		CAL0003757	4	C	1	1	27	30	879	94	85	2711	411	460	0.361361	0.482094	0.361361	0.749565	-0.152003	0.145198	0.297201	1
2629	orf19.2977	CAL0006108	MIA40	CAL0006108	1	C	5	5	835	1033	10081	1544	1722	20082	759	929	0.148615	0.198429	0.148615	0.748958	-0.306992	-0.157412	0.14958	1
3847	orf19.4403	CAL0001711	PGA49	CAL0001711	4	C	29	18	185	210	1804	188	246	1911	3303	3303	-0.20702	0.276562	0.20702	0.748548	-0.182864	-0.387926	-0.205062	1
295	orf19.4828	CAL0005341	DOA1	CAL0005341	1	W	5	4	107	105	1997	11	5	215	1530	1531	0.922312	1.23365	0.922312	0.747627	0.0272215	1.1375	1.11028	1
73	orf19.2272	CAL0006340	AFT2	CAL0006340	2	C	11	8	50	36	955	65	61	1403	2397	2729	-0.398626	0.533333	0.398626	0.747424	0.473931	0.0916305	-0.382301	1
4305	orf19.2365	CAL0000768	POL2	CAL0000768	R	C	59	40	668	690	5769	569	543	6239	6636	6641	0.113362	0.151986	0.113362	0.745871	-0.0467483	0.0674765	0.114225	1
5854	orf19.1210	CAL0002787		CAL0002787	6	W	3	2	35	57	3086	28	33	2090	1533	1547	0.509982	0.684431	0.509982	0.745118	-0.703607	-0.237039	0.466568	1
3010	orf19.1040	CAL0001147	MAD2	CAL0001147	1	W	5	4	138	146	1021	60	79	910	645	659	-0.321992	0.432168	0.321992	0.745062	-0.0813001	-0.39689	-0.31559	1
2265	orf19.5043	CAL0001668	PTP2	CAL0001668	4	W	9	7	55	50	613	72	83	840	1470	1480	-0.330702	0.444442	0.330702	0.744084	0.137504	-0.205114	-0.342618	1
5404	orf19.5214	CAL0003503	TES15	CAL0003503	2	C	5	6	97	84	1820	41	46	1075	2097	2114	-0.380833	0.513489	0.380833	0.741658	0.207595	-0.16601	-0.373605	1
4558	orf19.2529	CAL0002423		CAL0002423	R	W	2	2	142	183	3199	20	18	1033	618	670	0.625213	0.843491	0.625213	0.741221	-0.365953	0.152003	0.517956	1
5209	orf19.3639	CAL0000388		CAL0000388	2	W	15	8	73	88	656	263	268	1398	1065	1088	0.248581	0.335463	0.248581	0.741009	-0.269607	-0.0271702	0.242437	1
1268	orf19.3693	CAL0000485		CAL0000485	1	C	10	6	8	8	96	6	12	166	1926	1926	-1.06658	1.44188	1.06658	0.739715	0	-1	-1	1
2810	orf19.99	CAL0000710		CAL0000710	6	C	-1	3	69	75	1288	55	88	2716	1041	1185	-0.615934	0.833107	0.615934	0.739322	-0.120294	-0.678072	-0.557778	1
3507	orf19.6347	CAL0001327		CAL0001327	1	C	9	7	140	166	1937	144	143	2121	1563	1593	0.243916	0.329933	0.243916	0.739289	-0.245756	0.0100537	0.25581	1
1955	orf19.6291	CAL0000615	MAS2	CAL0000615	R	W	22	17	390	404	4445	725	695	7052	3294	3307	0.115447	0.156376	0.115447	0.738265	-0.0508812	0.060968	0.111849	1
503	orf19.1759	CAL0000874	PHO23	CAL0000874	2	C	13	9	283	277	2347	484	530	3999	1449	1481	-0.154254	0.208998	0.154254	0.738064	0.0309161	-0.130985	-0.161901	1
3495	orf19.5834	CAL0002327	SER2	CAL0002327	2	W	2	2	89	88	9828	262	307	19827	3009	3067	-0.249571	0.33886	0.249571	0.736502	0.0163018	-0.228672	-0.244974	1
127	orf19.1289	CAL0003066	SCT1	CAL0003066	3	W	21	14	529	438	3694	766	687	7489	2313	2352	-0.112376	0.152737	0.112376	0.735748	0.272337	0.157034	-0.115303	1
2835	orf19.1451	CAL0004613	SRB9	CAL0004613	2	W	4	4	55	41	2666	29	15	2931	4998	5013	0.596036	0.810337	0.596036	0.735541	0.423808	0.95109	0.527283	1
1210	orf19.6151	CAL0006043		CAL0006043	R	W	2	5	752	741	5489	1146	1301	13193	477	662	-0.225514	0.306922	0.225514	0.73476	0.0212591	-0.183014	-0.204273	1
5542	orf19.5618	CAL0000568		CAL0000568	6	C	6	6	140	147	2242	73	61	2418	1959	1972	0.324974	0.442456	0.324974	0.734478	-0.0703893	0.259087	0.329477	1
4315	orf19.822	CAL0002678	MED1	CAL0002678	2	C	5	4	30	33	228	42	35	349	570	581	0.421074	0.573562	0.421074	0.734139	-0.137504	0.263034	0.400538	1
1681	orf19.3851	CAL0002087		CAL0002087	R	W	16	7	58	32	258	35	26	203	1128	1143	-0.437032	0.59554	0.437032	0.733842	0.857981	0.428843	-0.429138	1
2131	orf19.6862	CAL0005828		CAL0005828	4	C	7	6	251	230	5939	396	407	6645	2310	2338	-0.155261	0.211794	0.155261	0.733076	0.126054	-0.0395284	-0.165582	1
1458	orf19.4735	CAL0004427		CAL0004427	1	W	15	9	181	117	849	204	152	1512	1053	1070	-0.200292	0.273231	0.200292	0.73305	0.629481	0.424498	-0.204983	1
5942	orf19.1760	CAL0000896	RAS1	CAL0000896	2	C	3	3	496	644	14825	1062	1279	21373	876	1220	0.114412	0.156104	0.114412	0.732922	-0.376721	-0.268232	0.108488	1
4072	orf19.338	CAL0004758	HWP2	CAL0004758	3	C	1	1	52	50	6246	20	28	8366	3144	3176	-0.472203	0.644376	0.472203	0.732807	0.0565835	-0.485427	-0.54201	1
2908	orf19.4396	CAL0001186		CAL0001186	R	W	11	8	1427	1287	16262	3209	3041	34405	1704	1801	-0.073101	0.099827	0.073101	0.732277	0.148973	0.077578	-0.0713953	1
1684	orf19.6886	CAL0005905	MKK2	CAL0005905	2	W	6	5	348	340	4732	1039	936	17355	1251	1296	0.114509	0.156502	0.114509	0.731678	0.0335526	0.150615	0.117063	1
2859	orf19.4401	CAL0001708	VPS11	CAL0001708	R	C	9	8	205	210	1874	238	271	2946	969	1006	-0.153935	0.210428	0.153935	0.731533	-0.0347654	-0.187331	-0.152566	1
4301	orf19.2560	CAL0002497	CDC60	CAL0002497	R	C	15	12	1632	1803	28662	4032	4704	90484	3294	3342	-0.078754	0.10766	0.078754	0.731507	-0.143758	-0.222392	-0.0786341	1
12	orf19.2574	CAL0002523		CAL0002523	R	C	19	16	209	178	2059	154	150	1743	2721	2790	-0.196918	0.269405	0.196918	0.730937	0.231626	0.0379679	-0.193658	1
4444	orf19.367	CAL0004864	GAL1	CAL0004864	4	W	30	18	320	244	2360	448	306	3500	2403	2416	0.152344	0.209128	0.152344	0.728473	0.391191	0.549967	0.158776	1
4733	orf19.4261	CAL0000279		CAL0000279	5	C	4	4	1187	1104	22212	4204	4160	66741	1263	1405	-0.095385	0.13099	0.095385	0.728185	0.10458	0.0151791	-0.0894006	1
1561	orf19.1264	CAL0002987	CFL2	CAL0002987	4	C	8	8	126	48	1498	243	111	4079	2217	2230	-0.285774	0.392745	0.285774	0.727632	1.39232	1.1304	-0.261921	1
1679	orf19.175	CAL0003214		CAL0003214	R	W	21	13	145	184	1041	211	234	1912	1551	1565	0.195362	0.268724	0.195362	0.726999	-0.343653	-0.149266	0.194387	1
3410	orf19.1358	CAL0003864	GCN4	CAL0003864	2	W	4	5	2807	3884	39907	516	634	18266	972	1649	0.164955	0.227177	0.164955	0.726108	-0.468514	-0.297112	0.171402	1
5816	orf19.4744	CAL0004451	JIP5	CAL0004451	1	C	20	13	179	193	1718	140	173	1559	2208	2245	-0.196218	0.270277	0.196218	0.725989	-0.108641	-0.305345	-0.196704	1
1787	orf19.454	CAL0005730	UBC8	CAL0005730	R	C	6	5	113	106	1909	180	196	5710	2418	2428	-0.210642	0.290194	0.210642	0.725866	0.0922585	-0.122857	-0.215115	1
1520	orf19.3937	CAL0002943		CAL0002943	5	W	14	7	112	112	922	471	421	2874	1182	1196	0.166837	0.229895	0.166837	0.72571	0	0.161907	0.161907	1
624	orf19.5281	CAL0003641		CAL0003641	1	W	25	19	1648	1565	22079	13227	13041	162522	3663	3845	-0.054945	0.075822	0.054945	0.724658	0.0745536	0.0204314	-0.0541222	1
4381	orf19.5041	CAL0001666		CAL0001666	4	C	4	3	27	22	668	33	19	662	1074	1187	0.659586	0.910789	0.659586	0.724192	0.295456	0.796467	0.501011	1
2429	orf19.712	CAL0001739	RVS161	CAL0001739	R	W	9	8	70	79	1385	51	74	1941	2736	2743	-0.359789	0.496932	0.359789	0.724021	-0.174498	-0.537028	-0.36253	1
537	orf19.1675	CAL0000108		CAL0000108	3	W	3	3	82	64	2422	235	215	4139	1203	1218	-0.232505	0.321625	0.232505	0.722907	0.357552	0.128324	-0.229228	1
2314	orf19.1842	CAL0001675	BUD5	CAL0001675	R	W	35	22	400	324	3912	378	275	3926	4677	4691	0.157205	0.218068	0.157205	0.720899	0.304006	0.458955	0.154948	1
3315	orf19.2346	CAL0000742		CAL0000742	1	W	8	7	139	103	1747	209	180	2069	1875	1894	-0.218495	0.303087	0.218495	0.720899	0.432441	0.215506	-0.216935	1
5584	orf19.577	CAL0000310		CAL0000310	5	C	4	4	123	95	3448	65	63	3066	1983	2031	-0.330974	0.459419	0.330974	0.720419	0.372659	0.0450879	-0.327571	1
394	orf19.5845	CAL0002354		CAL0002354	R	C	13	1	5	12	112	7	9	150	2451	2451	0.892407	1.23934	0.892407	0.720066	-1.26303	-0.36257	0.900464	1
4809	orf19.5219	CAL0003508	PIM1	CAL0003508	1	C	55	32	427	496	6265	283	360	4156	7932	7976	-0.13881	0.192829	0.13881	0.719861	-0.216104	-0.347195	-0.131091	1
1200	orf19.5114.1	CAL0120825	OLE1	CAL0120825	1	C	1	2	2242	1718	26413	3689	2681	40978	192	459	0.078717	0.10943	0.078717	0.719337	0.384056	0.460459	0.0764023	1
780	orf19.6343	CAL0001319		CAL0001319	1	C	3	3	244	312	5548	760	885	10831	1014	1102	0.135365	0.188181	0.135365	0.719334	-0.354665	-0.219678	0.134987	1
426	orf19.524	CAL0000119	SNT1	CAL0000119	R	C	6	6	83	46	855	98	69	1869	1347	1359	-0.342984	0.476896	0.342984	0.719201	0.851477	0.506185	-0.345292	1
4380	orf19.6877	CAL0005876	COG4	CAL0005876	2	W	5	5	46	85	3108	50	74	4071	2952	3189	0.323428	0.449788	0.323428	0.719068	-0.885829	-0.565597	0.320232	1
1413	orf19.4182	CAL0005850	MUC1	CAL0005850	4	W	1	1	14	18	881	5	11	652	990	991	-0.878167	1.22201	0.878167	0.718627	-0.36257	-1.1375	-0.774933	1
4487	orf19.6648	CAL0004046		CAL0004046	R	W	4	4	196	168	6298	215	161	10249	2280	2306	0.199731	0.279033	0.199731	0.715797	0.222392	0.417276	0.194884	1
4098	orf19.4767	CAL0004522		CAL0004522	1	W	7	8	22	65	252	41	90	561	741	878	0.429129	0.59977	0.429129	0.715489	-1.56294	-1.1343	0.428635	1
3773	orf19.4290	CAL0000375		CAL0000375	5	W	1	2	212	255	12057	388	408	37250	963	1127	0.176742	0.247249	0.176742	0.714834	-0.266433	-0.0725125	0.19392	1
2641	orf19.4246	CAL0000225		CAL0000225	5	W	25	10	2519	3579	21309	3547	4760	27171	1794	1973	0.080558	0.112717	0.080558	0.714693	-0.506705	-0.424362	0.0823432	1
1572	orf19.4862	CAL0005431	PET100	CAL0005431	1	C	3	3	113	130	1746	166	163	2273	597	825	0.217803	0.305159	0.217803	0.713736	-0.202189	0.0263113	0.2285	1
5654	orf19.2857	CAL0005155		CAL0005155	R	C	8	8	173	159	3945	149	158	4915	2532	2545	-0.208264	0.291969	0.208264	0.713309	0.121745	-0.0846122	-0.206358	1
591	orf19.1233	CAL0002876	ADE4	CAL0002876	1	C	3	4	1154	1132	31585	1100	1004	34513	1626	1892	0.119049	0.167057	0.119049	0.712625	0.0277693	0.131744	0.103975	1
3138	orf19.4885	CAL0005500		CAL0005500	1	W	1	1	489	645	51396	704	848	276122	924	1334	0.127589	0.179052	0.127589	0.712581	-0.399465	-0.268489	0.130976	1
3197	orf19.1990	CAL0002737	SNX4	CAL0002737	2	C	3	3	28	34	1424	55	52	3692	1893	1910	0.373221	0.52481	0.373221	0.711155	-0.280108	0.08092	0.361028	1
5311	orf19.1196	CAL0002162	PKH3	CAL0002162	6	W	10	9	58	57	1091	85	101	2384	2586	2601	-0.271165	0.381375	0.271165	0.711019	0.025091	-0.248821	-0.273912	1
5164	orf19.1757	CAL0000873		CAL0000873	2	W	7	4	44	44	1176	72	56	1356	1755	1752	0.37262	0.524953	0.37262	0.709816	0	0.36257	0.36257	1
401	orf19.35	CAL0000551		CAL0000551	2	W	15	11	189	138	2497	113	96	1341	2937	3058	-0.213965	0.301479	0.213965	0.709718	0.453718	0.235216	-0.218502	1
792	orf19.556	CAL0000240		CAL0000240	R	C	0	2	209	264	6423	405	457	17646	420	657	0.175799	0.248073	0.175799	0.708658	-0.337035	-0.174272	0.162763	1
1814	orf19.4031	CAL0004763	RPN5	CAL0004763	5	C	3	3	7	8	619	21	14	826	2694	2694	0.843282	1.19065	0.843282	0.708252	-0.192645	0.584963	0.777608	1
4440	orf19.1212	CAL0002790		CAL0002790	6	W	2	2	171	151	6133	927	739	42854	1110	1111	0.159539	0.225629	0.159539	0.707086	0.179448	0.326995	0.147547	1
158	orf19.5572	CAL0006230		CAL0006230	6	C	14	9	229	248	1832	372	446	2893	1299	1377	-0.144828	0.205122	0.144828	0.706058	-0.114993	-0.261741	-0.146749	1
2217	orf19.4395	CAL0001184		CAL0001184	R	C	7	7	380	304	5553	984	856	17959	1842	1878	-0.124746	0.176842	0.124746	0.705409	0.321928	0.201048	-0.120881	1
2124	orf19.3826	CAL0001994		CAL0001994	4	C	11	7	167	199	988	169	177	982	849	972	0.189921	0.269336	0.189921	0.705145	-0.25292	-0.0667261	0.186194	1
1269	orf19.3151	CAL0002336		CAL0002336	2	W	5	4	32	33	671	32	43	716	1170	1182	-0.463084	0.65738	0.463084	0.704439	-0.0443941	-0.426265	-0.381871	1
3508	orf19.2422	CAL0001493	ARC1	CAL0001493	R	W	12	8	1699	1734	15288	8338	8987	77463	1110	1190	-0.080036	0.11364	0.080036	0.704294	-0.029418	-0.108138	-0.0787202	1
5825	orf19.242.2	CAF0006892		CAF0006892	3	W	0	2	211	199	2883	13	7	7051	189	350	0.803193	1.14174	0.803193	0.70348	0.0844746	0.893085	0.80861	1
3471	orf19.1771	CAL0000928	CWC22	CAL0000928	2	W	9	7	76	81	1794	106	93	1650	1947	1961	0.294267	0.418885	0.294267	0.702501	-0.0919225	0.188762	0.280684	1
4395	orf19.1560	CAL0005561	POB3	CAL0005561	2	W	1	1	50	64	9082	126	217	23192	1617	1651	-0.399981	0.570546	0.399981	0.70105	-0.356144	-0.784271	-0.428127	1
3256	orf19.390	CAL0004942		CAL0004942	1	C	1	1	128	94	5669	379	240	14681	576	675	0.205654	0.293777	0.205654	0.700034	0.445411	0.659163	0.213752	1
2004	orf19.5559	CAL0006190	RNH1	CAL0006190	6	W	10	6	162	135	1311	173	164	1242	1068	1119	-0.198871	0.284171	0.198871	0.699829	0.263034	0.0770762	-0.185958	1
4747	orf19.201	CAL0003867		CAL0003867	2	W	2	2	27	32	474	7	12	339	504	505	-0.595755	0.854766	0.595755	0.69698	-0.245112	-0.777608	-0.532495	1
2770	orf19.6492	CAL0002330	TRS33	CAL0002330	7	C	11	6	47	43	496	116	86	648	1227	1227	0.301254	0.432359	0.301254	0.696768	0.128324	0.431716	0.303392	1
28	orf19.489	CAL0005848	CLA4	CAL0005848	R	C	1	2	172	252	3708	37	43	2687	468	611	0.329229	0.47342	0.329229	0.695427	-0.551015	-0.216811	0.334204	1
1449	orf19.3003.1	CAF0006876	RPL6	CAF0006876	1	W	1	1	1800	2014	69753	14597	15039	469692	531	532	0.138474	0.199329	0.138474	0.694701	-0.162067	-0.0430367	0.11903	1
3920	orf19.5832	CAL0002325		CAL0002325	2	C	4	4	2305	2606	25960	2493	3010	54823	642	830	-0.089391	0.128808	0.089391	0.693986	-0.17707	-0.271881	-0.0948103	1
4633	orf19.5117	CAL0002511	SDS24	CAL0002511	1	C	6	4	2762	2350	85565	5970	4832	102146	1461	1865	0.077869	0.112329	0.077869	0.693223	0.233053	0.30511	0.0720579	1
703	orf19.2051	CAL0004433		CAL0004433	2	C	-1	15	93	107	1409	220	221	2674	2853	2854	0.200187	0.288799	0.200187	0.693171	-0.202308	-0.00654285	0.195765	1
974	orf19.1623	CAL0006368	CAP1	CAL0006368	3	W	15	10	140	148	1193	768	898	6501	1500	1515	-0.146006	0.211137	0.146006	0.691523	-0.0801703	-0.225609	-0.145439	1
4045	orf19.5604	CAL0000532		CAL0000532	6	C	23	14	21	25	131	25	41	188	1695	1695	-0.488304	0.706214	0.488304	0.691439	-0.251539	-0.713696	-0.462157	1
5758	orf19.3752	CAL0001214	SEF1	CAL0001214	R	C	7	4	320	310	3466	667	714	10790	1086	1099	-0.143927	0.208342	0.143927	0.690821	0.0458037	-0.0982373	-0.144041	1
3142	orf19.2485	CAL0001635		CAL0001635	1	C	19	19	972	897	13679	1004	984	13918	4281	4340	-0.088574	0.128277	0.088574	0.69049	0.115848	0.029029	-0.0868193	1
5341	orf19.1097	CAL0001283	ALS2	CAL0001283	6	W	36	29	868	539	8253	891	597	9791	7089	7730	-0.107973	0.156372	0.107973	0.690488	0.68741	0.577695	-0.109715	1
1008	orf19.2187	CAL0005452	ALG7	CAL0005452	2	C	4	4	68	76	2576	66	63	1630	1485	1496	0.226315	0.327911	0.226315	0.690172	-0.160465	0.0671142	0.227579	1
1979	orf19.6220	CAL0000456	SPO22	CAL0000456	1	C	5	5	74	82	3362	42	36	1524	2697	2709	0.395347	0.572832	0.395347	0.690162	-0.148099	0.222392	0.370491	1
5744	orf19.4390	CAL0001169		CAL0001169	R	W	4	1	26	28	1310	107	85	4128	1500	1514	0.463758	0.672127	0.463758	0.689986	-0.106915	0.332076	0.438991	1
4571	orf19.3678	CAL0000454		CAL0000454	1	W	12	7	72	81	812	170	163	2409	1716	1729	0.232322	0.336833	0.232322	0.689725	-0.169925	0.0606628	0.230588	1
88	orf19.795	CAL0002025	TAF14	CAL0002025	2	W	23	13	219	192	1381	115	85	846	1998	2013	0.242245	0.352527	0.242245	0.687167	0.189825	0.436099	0.246275	1
2369	orf19.3332	CAL0004114		CAL0004114	1	W	14	11	152	143	2108	69	77	1306	2979	2992	-0.245221	0.356971	0.245221	0.686949	0.0880562	-0.158262	-0.246318	1
1160	orf19.5388	CAL0004413	FKH2	CAL0004413	3	C	8	6	98	75	1049	79	74	1087	1344	1370	-0.289112	0.42136	0.289112	0.68614	0.385891	0.0943274	-0.291564	1
588	orf19.764	CAL0001899		CAL0001899	1	C	9	7	80	96	1721	123	123	2915	2658	2661	0.248834	0.362955	0.248834	0.685578	-0.263034	0	0.263034	1
5689	orf19.1434	CAL0004555		CAL0004555	2	C	-1	21	345	367	2358	229	269	1508	2190	2198	-0.14803	0.216234	0.14803	0.684582	-0.0891837	-0.232259	-0.143075	1
4137	orf19.2805	CAL0005030	PEX8	CAL0005030	3	C	15	9	82	95	1236	52	77	1210	2484	2518	-0.355511	0.519832	0.355511	0.683896	-0.212304	-0.566347	-0.354043	1
812	orf19.5541	CAL0006161	SAC6	CAL0006161	6	C	10	9	382	357	5532	1210	1043	23300	1938	2143	0.113256	0.165714	0.113256	0.683443	0.0976486	0.214268	0.116619	1
5562	orf19.5830	CAL0002323		CAL0002323	2	W	9	9	467	486	10001	530	594	12868	2799	2927	-0.104551	0.152985	0.104551	0.683407	-0.0575338	-0.164471	-0.106937	1
2374	orf19.1070	CAL0001220		CAL0001220	1	C	13	8	218	180	1096	86	59	500	954	1101	0.267298	0.391732	0.267298	0.682349	0.276331	0.543622	0.26729	1
5492	orf19.90	CAL0000702		CAL0000702	6	W	11	7	39	34	1016	73	52	1237	2265	2276	0.30781	0.451409	0.30781	0.681887	0.197939	0.489385	0.291445	1
2818	orf19.1356	CAL0003861		CAL0003861	2	W	7	7	39	95	668	69	135	1186	1008	1026	0.302667	0.444533	0.302667	0.680865	-1.28445	-0.968291	0.316162	1
4175	orf19.1764	CAL0000900		CAL0000900	2	C	6	4	248	256	3473	281	337	3987	849	951	-0.205599	0.302371	0.205599	0.679956	-0.0458037	-0.262178	-0.216375	1
3965	orf19.1308	CAL0003710		CAL0003710	4	W	3	2	58	54	3894	296	228	9131	1746	1763	0.26379	0.388239	0.26379	0.679453	0.103093	0.376563	0.27347	1
3290	orf19.191	CAL0003268	KIC1	CAL0003268	2	W	11	10	99	79	2092	104	101	2726	2676	2804	-0.272635	0.401711	0.272635	0.678684	0.325576	0.0422282	-0.283348	1
2951	orf19.1228	CAL0002841	HAP2	CAL0002841	1	W	9	8	214	212	1852	322	361	4019	1095	1118	-0.169907	0.250368	0.169907	0.678629	0.0135465	-0.164938	-0.178485	1
3792	orf19.1816	CAL0001605	ALS3	CAL0001605	R	C	15	3	54	52	551	13	8	124	3468	3468	0.690021	1.02041	0.690021	0.676218	0.0544478	0.70044	0.645992	1
4515	orf19.2647	CAL0003462	ZCF14	CAL0003462	5	C	10	5	31	38	324	36	34	311	1587	1587	0.392572	0.583071	0.392572	0.673283	-0.293731	0.0824622	0.376193	1
2891	orf19.4787	CAL0004593	ARG5,6	CAL0004593	1	W	15	12	123	107	970	334	328	3508	2193	2208	-0.170276	0.253152	0.170276	0.672624	0.201048	0.0261523	-0.174895	1
3610	orf19.2968	CAL0006084		CAL0006084	1	W	5	5	7	6	51	15	7	70	603	603	0.870972	1.29514	0.870972	0.672494	0.222392	1.09954	0.877143	1
3432	orf19.1277	CAL0003022		CAL0003022	4	C	8	5	12	9	77	32	35	390	1179	1191	-0.593439	0.883387	0.593439	0.671777	0.415037	-0.129283	-0.544321	1
132	orf19.4864	CAL0005433		CAL0005433	1	C	5	5	332	282	2638	385	368	6207	915	947	-0.171129	0.254994	0.171129	0.67111	0.235488	0.0651527	-0.170335	1
5687	orf19.3942.1	CAF0007000	GRR1	CAF0007000	5	C	-1	1	5389	5049	82211	17801	19956	328031	6	7	-0.23451	0.349756	0.23451	0.670496	0.0940199	-0.164864	-0.258884	1
16	orf19.2690	CAL0003545		CAL0003545	4	W	3	3	59	46	2856	36	36	3849	2694	2708	-0.38056	0.568817	0.38056	0.669038	0.359081	0	-0.359081	1
3832	orf19.4216	CAL0000101		CAL0000101	5	W	2	2	439	339	11614	593	520	11558	507	540	-0.19221	0.287648	0.19221	0.668213	0.372936	0.18952	-0.183415	1
3407	orf19.1666	CAL0000072		CAL0000072	3	C	1	1	22	30	1018	39	27	4709	1596	1607	0.723982	1.08442	0.723982	0.667618	-0.447459	0.530515	0.977974	1
4672	orf19.2078	CAL0004501		CAL0004501	2	W	8	5	101	103	2423	43	32	930	2010	2023	0.455806	0.682922	0.455806	0.667435	-0.028289	0.426265	0.454554	1
4748	orf19.3040	CAL0001403	EHT1	CAL0001403	1	W	5	5	144	159	2879	314	307	4395	1278	1292	0.17322	0.25956	0.17322	0.66736	-0.142958	0.0325259	0.175484	1
3212	orf19.3613	CAL0000306		CAL0000306	2	C	1	1	52	43	3725	40	40	7504	1404	1455	-0.320344	0.480332	0.320344	0.666922	0.274175	0	-0.274175	1
4631	orf19.3087.2	CAL0120674		CAL0120674	4	W	1	1	43	28	449	28	22	480	180	213	-0.322848	0.484129	0.322848	0.666864	0.61891	0.347923	-0.270987	1
5852	orf19.1849	CAL0001680		CAL0001680	R	W	13	7	312	330	3806	888	873	10478	2154	2168	0.110512	0.165877	0.110512	0.666229	-0.08092	0.024578	0.105498	1
3427	orf19.4785	CAL0004589	FGR43	CAL0004589	1	C	10	8	173	180	1581	393	457	3216	1128	1153	-0.153967	0.231772	0.153967	0.664304	-0.0572249	-0.217665	-0.16044	1
2861	orf19.3016	CAL0001350		CAL0001350	1	W	1	1	147	121	4070	162	160	7543	426	525	-0.217234	0.327487	0.217234	0.663336	0.280809	0.0179219	-0.262887	1
1461	orf19.4476	CAL0001960	CSH1	CAL0001960	1	C	12	7	16	7	81	28	19	227	1035	1044	-0.648549	0.978466	0.648549	0.662822	1.19265	0.559427	-0.633218	1
3921	orf19.4186	CAL0005857		CAL0005857	4	C	11	7	493	410	4824	1325	1013	14163	1374	1442	0.120824	0.182316	0.120824	0.662717	0.265964	0.387358	0.121394	1
2724	orf19.1926	CAL0002540	SEF2	CAL0002540	5	W	13	10	284	267	2599	152	161	4145	1986	2005	-0.169803	0.256429	0.169803	0.662183	0.0890512	-0.0829894	-0.172041	1
3878	orf19.3994	CAL0003173	RIM13	CAL0003173	5	C	1	1	69	113	6863	101	198	9492	1191	1203	-0.256984	0.388323	0.256984	0.661779	-0.711655	-0.971145	-0.259491	1
3535	orf19.4220	CAL0000128	ORC4	CAL0000128	5	C	5	6	524	537	3152	1061	1022	6363	552	577	0.086667	0.130971	0.086667	0.661727	-0.0353553	0.0540295	0.0893847	1
5679	orf19.3921	CAL0002896		CAL0002896	5	C	2	2	104	141	3090	138	217	5322	852	868	-0.201648	0.304867	0.201648	0.661429	-0.439112	-0.653027	-0.213915	1
4512	orf19.1479	CAL0004695		CAL0004695	2	C	11	9	65	61	873	265	287	4184	2343	2385	-0.217561	0.329304	0.217561	0.660669	0.0916305	-0.115058	-0.206689	1
402	orf19.5798	CAL0001558		CAL0001558	2	W	10	7	55	51	913	33	24	516	2787	2787	0.354486	0.536557	0.354486	0.660668	0.108934	0.459432	0.350497	1
307	orf19.2198	CAL0005484	FLC3	CAL0005484	2	W	17	9	183	155	2073	105	103	1751	2157	2172	-0.208194	0.315476	0.208194	0.659936	0.239575	0.027745	-0.21183	1
5436	orf19.3187	CAL0002425	ZNC1	CAL0002425	5	C	41	21	362	354	2825	485	514	2747	2769	2782	-0.119067	0.180641	0.119067	0.659136	0.0322403	-0.0837836	-0.116024	1
2741	orf19.4945	CAL0006305		CAL0006305	1	C	11	7	192	188	5201	319	279	10677	3645	3656	0.164436	0.250051	0.164436	0.65761	0.0303736	0.193291	0.162918	1
6021	orf19.529	CAL0000133		CAL0000133	R	C	6	5	113	105	1359	139	150	3647	2388	2419	-0.217022	0.330067	0.217022	0.657509	0.105933	-0.109878	-0.215811	1
4780	orf19.826	CAL0002681		CAL0002681	2	C	1	1	156	96	4457	19	16	3751	1857	1916	-0.494576	0.752845	0.494576	0.656943	0.70044	0.247928	-0.452512	1
3335	orf19.4376	CAL0001117	KRE1	CAL0001117	R	C	3	3	17	23	288	45	46	501	738	749	0.403417	0.614355	0.403417	0.656651	-0.436099	-0.0317089	0.40439	1
661	orf19.1404	CAL0004455		CAL0004455	2	W	5	3	164	158	4158	404	439	6040	1404	1425	-0.19729	0.300765	0.19729	0.655961	0.0537713	-0.119866	-0.173637	1
4047	orf19.3355	CAL0004158	ESP1	CAL0004158	1	W	6	6	208	281	3199	112	171	2994	1383	1397	-0.190005	0.290485	0.190005	0.654096	-0.433987	-0.610498	-0.176511	1
3348	orf19.4870	CAL0005460	ERO1	CAL0005460	1	W	20	10	1567	1547	10892	2875	2693	29759	1695	1695	0.073346	0.11216	0.073346	0.653941	0.018532	0.0943477	0.0758157	1
6036	orf19.3298	CAL0003447	CCH1	CAL0003447	1	W	6	6	16	15	2970	40	52	2758	6765	6779	-0.461146	0.70521	0.461146	0.653913	0.0931094	-0.378512	-0.471621	1
246	orf19.1881	CAL0001792		CAL0001792	2	W	9	7	295	300	4788	197	226	3969	1809	1825	-0.165986	0.253861	0.165986	0.653846	-0.0242475	-0.198127	-0.17388	1
1371	orf19.2270	CAL0006336	SMF12	CAL0006336	2	W	3	3	84	73	3437	240	240	5906	1755	1837	-0.208364	0.3189	0.208364	0.653384	0.202493	0	-0.202493	1
431	orf19.3344	CAL0004139	SIZ1	CAL0004139	1	W	1	1	8	6	1878	19	8	3372	1560	1600	0.91368	1.39874	0.91368	0.653217	0.415037	1.24793	0.83289	1
1783	orf19.5597.1	CAL0120862			6	W	0	2	3432	2650	30009	40	24	59324	192	391	0.420512	0.644015	0.420512	0.652954	0.373057	0.736966	0.363908	1
1063	orf19.5558	CAL0006188	STE23	CAL0006188	6	C	13	7	179	166	2047	768	788	8514	1605	1663	-0.137194	0.210476	0.137194	0.651827	0.108776	-0.0370893	-0.145866	1
4601	orf19.3349	CAL0004145		CAL0004145	1	C	8	8	501	546	13617	485	485	21400	3705	3752	0.122975	0.188717	0.122975	0.651637	-0.12409	0	0.12409	1
3750	orf19.925	CAL0003630		CAL0003630	5	C	5	5	354	394	9652	335	342	5031	1527	1656	0.141357	0.216968	0.141357	0.651511	-0.154446	-0.0298352	0.124611	1
4473	orf19.2601	CAL0003351	HEM1	CAL0003351	R	C	5	5	123	142	3905	533	552	11654	1695	1762	0.147925	0.227496	0.147925	0.650231	-0.207233	-0.0505327	0.1567	1
5553	orf19.1656	CAL0000041		CAL0000041	3	C	12	10	38	32	343	36	40	368	1797	1799	-0.389483	0.599734	0.389483	0.649426	0.247928	-0.152003	-0.399931	1
3189	orf19.1351	CAL0003854		CAL0003854	2	C	-1	8	66	71	612	143	131	665	834	783	0.242601	0.373786	0.242601	0.649037	-0.105353	0.126448	0.231801	1
4991	orf19.5070	CAL0001751	NRP1	CAL0001751	1	C	12	7	117	92	938	102	68	650	1296	1309	0.250037	0.385604	0.250037	0.648429	0.346803	0.584963	0.23816	1
2496	orf19.4940	CAL0006299	TYE7	CAL0006299	1	C	5	4	178	151	5295	525	403	5603	1680	1732	0.148129	0.228485	0.148129	0.64831	0.237329	0.381538	0.144209	1
3997	orf19.3626	CAL0000351		CAL0000351	2	C	15	12	175	211	1620	373	500	2851	2115	2140	-0.152545	0.235585	0.152545	0.647516	-0.269888	-0.422752	-0.152864	1
5619	orf19.4110	CAL0005583		CAL0005583	2	W	10	8	49	47	1243	40	49	902	3129	3129	-0.362989	0.560902	0.362989	0.647152	0.060121	-0.292782	-0.352903	1
[truncated: 4,204 more rows]

## Sheet: Sheet2
CAL_Name	A21_GFF_Index	ORF_Name	BS_Mean	BS_Std	ABS(BS_Mean)
CAL0000185	4671	orf19.4236	0.845872	0.105079	0.845872
CAL0003197	3682	orf19.169	-0.949895	0.133404	0.949895
CAL0006784	252	orf19.1105.2	-1.99772	0.297222	1.99772
CAL0005565	1465	orf19.1565	-1.0832	0.176977	1.0832
CAL0005913	5701	orf19.3547	-0.485143	0.082596	0.485143
CAL0005861	6130	orf19.490	-1.59043	0.277868	1.59043
CAL0120819	257	orf19.5064.1	2.26909	0.399237	2.26909
CAL0000917	3028	orf19.4311	0.326605	0.059988	0.326605
CAL0002982	6174	orf19.3947	-0.782852	0.145048	0.782852
CAL0001207	1237	orf19.1064	-0.39475	0.077163	0.39475
CAF0007466	5457	orf19.4674.1	-0.598004	0.11926	0.598004
CAL0120491	2942	orf19.1026.1	-3.74621	0.759292	3.74621
CAL0006092	1024	orf19.5515	0.743165	0.153112	0.743165
CAL0002252	3301	orf19.5806	0.676241	0.139543	0.676241
CAL0004650	5547	orf19.4009	-0.762115	0.158649	0.762115
CAL0006052	1660	orf19.2954	-0.710656	0.14941	0.710656
CAL0001406	5481	orf19.6385	0.707733	0.149602	0.707733
CAL0001059	1286	orf19.665	0.505105	0.107166	0.505105
CAL0001259	4114	orf19.6312	0.328707	0.069871	0.328707
CAL0001962	604	orf19.4477	-1.49408	0.318096	1.49408
CAL0005746	5555	orf19.4152	-0.280439	0.060893	0.280439
CAL0005171	316	orf19.2862	-1.09573	0.242314	1.09573
CAL0005434	215	orf19.4865	0.76647	0.169624	0.76647
CAL0005839	346	orf19.3523	1.09681	0.245919	1.09681
CAL0002509	2552	orf19.5113	-3.00589	0.674155	3.00589
CAL0003247	1942	orf19.3221	2.86146	0.651156	2.86146
CAL0003105	6175	orf19.1295	0.511528	0.117037	0.511528
CAL0004304	3621	orf19.2795	-0.497451	0.115524	0.497451
CAL0001764	4822	orf19.1872	0.821554	0.190989	0.821554
CAL0000898	2521	orf19.1762	-1.44679	0.343217	1.44679
CAL0004255	5538	orf19.2765	0.875995	0.208581	0.875995
CAL0004378	2293	orf19.4718	-0.522304	0.12471	0.522304
CAL0003142	6056	orf19.150	-1.34811	0.323072	1.34811
CAL0001441	2468	orf19.5742	2.2667	0.547285	2.2667
CAL0000841	367	orf19.2396	-0.563732	0.136425	0.563732
CAL0000561	4596	orf19.6271	-1.40263	0.343566	1.40263
CAF0007445	2656	orf19.3223.1	-0.749352	0.185161	0.749352
CAL0003260	2853	orf19.3227	0.90745	0.225157	0.90745
CAL0003655	4247	orf19.930	-0.403316	0.100322	0.403316
CAL0002719	4261	orf19.4532	-0.499299	0.1245	0.499299
CAL0001750	2936	orf19.4413	0.662968	0.167993	0.662968
CAL0001661	6179	orf19.1839	-0.356017	0.090222	0.356017
CAL0001762	837	orf19.5079	2.47005	0.627043	2.47005
CAL0004402	3356	orf19.5383	-0.475241	0.121091	0.475241
CAL0002882	2823	orf19.1236	-0.528692	0.135156	0.528692
CAL0001151	775	orf19.1042	0.550737	0.141452	0.550737
CAL0001281	2208	orf19.1095	0.473418	0.121597	0.473418
CAL0003511	1693	orf19.2672	-0.40268	0.106206	0.40268
CAL0002880	1939	orf19.1235	0.404948	0.107193	0.404948
CAL0000348	190	orf19.3625	2.10067	0.56244	2.10067
CAL0003912	4248	orf19.1376	0.589452	0.158638	0.589452
CAL0003616	2388	orf19.4616	-0.39097	0.105237	0.39097
CAL0001419	69	orf19.5732	-0.544884	0.147283	0.544884
CAL0000474	5393	orf19.6231	0.555335	0.150176	0.555335
CAL0006377	3350	orf19.2283	1.13686	0.307607	1.13686
CAL0000170	1291	orf19.4230	0.488809	0.133048	0.488809
CAL0000704	568	orf19.92	-0.327926	0.08939	0.327926
CAL0001993	1163	orf19.4482	2.72118	0.742558	2.72118
CAL0002204	2886	orf19.3895	-0.308467	0.084516	0.308467
CAL0000681	1059	orf19.84	3.23912	0.889518	3.23912
CAL0004818	1938	orf19.4048	-1.03302	0.286594	1.03302
CAL0006298	1940	orf19.2259	-0.611482	0.169757	0.611482
CAL0001135	3937	orf19.3722	-0.611764	0.170126	0.611764
CAL0000780	3378	orf19.2371	-0.579958	0.162178	0.579958
CAL0004969	2882	orf19.4092	-1.61428	0.451539	1.61428
CAL0005926	4697	orf19.3554	-0.410415	0.11481	0.410415
CAL0006170	3474	orf19.5547	0.667277	0.190674	0.667277
CAL0005886	4726	orf19.4192	-1.37092	0.392126	1.37092
CAL0001139	5334	orf19.687	-1.09458	0.314659	1.09458
CAL0002581	4964	orf19.1940	-0.670042	0.192737	0.670042
CAL0001692	759	orf19.1853	0.745205	0.214939	0.745205
CAL0002861	2830	orf19.3914	-0.462562	0.133732	0.462562
CAL0001199	2487	orf19.3744	-1.39364	0.403684	1.39364
CAL0000321	674	orf19.3618	0.518534	0.150546	0.518534
CAL0003644	6012	orf19.4626	0.953704	0.277408	0.953704
CAL0006205	1963	orf19.4907	0.705338	0.205332	0.705338
CAL0005666	6027	orf19.4131	-0.45803	0.13394	0.45803
CAL0005449	2356	orf19.2185	-0.682594	0.199783	0.682594
CAL0004429	1556	orf19.4736	1.02632	0.303535	1.02632
CAL0001014	2946	orf19.649	0.49485	0.146404	0.49485
CAF0006984	990	orf19.3366.1	-0.759919	0.226195	0.759919
CAL0002418	2437	orf19.3183	0.729386	0.217447	0.729386
CAL0004420	2400	orf19.4730	1.12646	0.336677	1.12646
CAL0002517	4252	orf19.2570	0.268934	0.080963	0.268934
CAL0003857	1453	orf19.1354	-0.742907	0.223758	0.742907
CAL0003639	6147	orf19.5280	-0.673806	0.203096	0.673806
CAL0002967	1553	orf19.105	0.850088	0.257628	0.850088
CAL0120823	1278	orf19.5079.1	1.85463	0.562914	1.85463
CAL0005448	1981	orf19.1528	-0.797132	0.242358	0.797132
CAL0005572	5044	orf19.412	-0.31144	0.095386	0.31144
CAF0007057	4888	orf19.5854.1	1.33476	0.412128	1.33476
CAL0001119	6052	orf19.4377	-0.529635	0.163888	0.529635
CAL0000782	2269	orf19.2372	-0.561151	0.17423	0.561151
CAL0002596	4652	orf19.1950	1.44465	0.449302	1.44465
CAL0001582	6186	orf19.1806	-0.772951	0.240597	0.772951
CAL0002273	5308	orf19.5813	2.02548	0.632063	2.02548
CAL0005315	1248	orf19.4815	-0.459366	0.143836	0.459366
CAL0002267	4294	orf19.3126	-0.657488	0.206059	0.657488
CAL0006246	839	orf19.2236	-0.786416	0.247338	0.786416
CAL0002612	4198	orf19.807	0.358122	0.11273	0.358122
CAL0000929	5088	orf19.1772	0.667125	0.210157	0.667125
CAL0005999	3489	orf19.2929	0.41212	0.130255	0.41212
CAL0003946	3705	orf19.1389	-0.450494	0.143086	0.450494
CAL0005108	2482	orf19.2831	-2.4173	0.767867	2.4173
CAL0003924	2251	orf19.225	1.66241	0.528253	1.66241
CAL0000191	1592	orf19.1697	0.497771	0.158621	0.497771
CAL0005895	1344	orf19.4199	0.963439	0.307611	0.963439
CAL0005709	4801	orf19.449	-1.30901	0.418645	1.30901
CAL0001483	579	orf19.2418	0.687271	0.219917	0.687271
CAL0001799	5669	orf19.729.1	-0.831785	0.266778	0.831785
CAL0006334	3538	orf19.4956	-0.486312	0.156023	0.486312
CAL0004519	5488	orf19.4765	-0.331466	0.106399	0.331466
CAL0003631	4436	orf19.926	0.674978	0.217056	0.674978
CAL0002069	1716	orf19.1161	0.582576	0.189312	0.582576
CAL0006417	2324	orf19.2298	-1.18893	0.387842	1.18893
CAL0004863	3520	orf19.3402	-1.08774	0.35618	1.08774
CAL0001634	1385	orf19.1828	-0.777336	0.254707	0.777336
CAL0003535	2155	orf19.5230	0.650282	0.213657	0.650282
CAL0005797	1293	orf19.6854	-0.253818	0.083482	0.253818
CAL0002131	2057	orf19.1186	0.768343	0.254008	0.768343
CAL0003365	5352	orf19.2609	0.69151	0.229657	0.69151
CAL0005539	4449	orf19.405	-0.728265	0.242725	0.728265
CAL0001424	1600	orf19.5735	1.20809	0.403342	1.20809
CAL0003680	331	orf19.4639	1.21469	0.407225	1.21469
CAL0000648	2679	orf19.2305	-0.663606	0.223957	0.663606
CAL0000904	5129	orf19.1768	-3.02588	1.02262	3.02588
CAL0004737	4501	orf19.1485	-0.484384	0.163838	0.484384
CAL0000517	880	orf19.6259	0.475831	0.161123	0.475831
CAF0006985	1274	orf19.3415.1	-0.328082	0.111223	0.328082
CAL0005635	2498	orf19.4127	0.567366	0.192748	0.567366
CAL0001261	609	orf19.6314	-0.468632	0.160294	0.468632
CAL0005414	4825	orf19.1517	0.378023	0.129439	0.378023
CAL0003171	17	orf19.3991	-0.805433	0.277113	0.805433
CAL0005176	26	orf19.2867	0.693904	0.238867	0.693904
CAL0001741	793	orf19.714	-0.50367	0.173427	0.50367
CAL0006381	395	orf19.2286	-0.345925	0.119918	0.345925
CAL0001865	3835	orf19.755	-1.03496	0.359423	1.03496
CAL0003427	5395	orf19.2631	-0.469274	0.162974	0.469274
CAL0004656	3994	orf19.1466	-0.898568	0.312162	0.898568
CAL0000641	3308	orf19.5645	-0.38424	0.133804	0.38424
CAL0006367	1521	orf19.4966	-1.35302	0.472375	1.35302
CAF0006955	4445	orf19.2511.1	0.926581	0.324228	0.926581
CAL0004121	2592	orf19.3335	0.821909	0.287752	0.821909
CAL0003799	2965	orf19.1339	-0.359332	0.125901	0.359332
CAL0002587	441	orf19.1946	0.60979	0.215841	0.60979
CAL0002401	2506	orf19.3178	0.65093	0.231047	0.65093
CAL0004197	3785	orf19.2722	-0.703573	0.250132	0.703573
CAL0004474	3219	orf19.4750	1.01375	0.360435	1.01375
CAL0004365	1538	orf19.2028	-0.929094	0.330664	0.929094
CAL0003993	5529	orf19.248	-0.620987	0.221379	0.620987
CAL0002214	1711	orf19.3102	1.08379	0.386778	1.08379
CAL0001399	592	orf19.6382	1.94371	0.69575	1.94371
CAL0004027	3058	orf19.260	0.401949	0.144446	0.401949
CAL0006096	2968	orf19.5518	-0.514903	0.186006	0.514903
CAL0005527	1851	orf19.1553	-0.327565	0.118591	0.327565
CAL0000399	51	orf19.3642	-0.268475	0.097318	0.268475
CAL0003816	1871	orf19.4681	0.865902	0.314243	0.865902
CAL0004219	966	orf19.2737	-0.369624	0.134212	0.369624
CAL0000227	4538	orf19.4248	0.343133	0.124642	0.343133
CAL0001321	116	orf19.6344	0.847834	0.308337	0.847834
CAL0001453	4557	orf19.5749	-0.334598	0.12171	0.334598
CAL0001968	337	orf19.1139	0.494514	0.180358	0.494514
CAL0005345	1742	orf19.2143	0.4265	0.155714	0.4265
CAL0003204	3512	orf19.171	0.770919	0.281468	0.770919
CAL0000495	1620	orf19.6243	-0.742132	0.271324	0.742132
CAL0004001	1176	orf19.250	-0.456688	0.167187	0.456688
CAF0006905	4842	orf19.645.1	0.467202	0.17126	0.467202
CAL0000677	4213	orf19.2319	-0.331115	0.121577	0.331115
CAL0000344	5807	orf19.3624	0.583327	0.214209	0.583327
CAL0006369	1451	orf19.4967	1.12888	0.415018	1.12888
CAL0004953	3396	orf19.395	-1.01802	0.374377	1.01802
CAF0007422	2798	orf19.4380.1	3.86378	1.4213	3.86378
CAL0006217	5635	orf19.5568	0.783147	0.288697	0.783147
CAF0006928	2	orf19.1667.1	1.45883	0.538197	1.45883
CAL0000433	3607	orf19.3661	0.575168	0.212641	0.575168
CAL0002796	6013	orf19.1217	0.404605	0.149869	0.404605
CAL0004817	4106	orf19.4046	-1.30926	0.485111	1.30926
CAL0001484	5712	orf19.2419	0.465956	0.172657	0.465956
CAL0004710	2365	orf19.6706	-0.758156	0.281096	0.758156
CAL0003416	3078	orf19.2629	0.453735	0.168266	0.453735
CAL0001900	4884	orf19.3802	-0.671239	0.249324	0.671239
CAL0005047	1033	orf19.6016	-0.587805	0.218765	0.587805
CAF0006891	5118	orf19.233.1	0.479048	0.178412	0.479048
CAL0000855	803	orf19.1743	-0.306764	0.114363	0.306764
CAL0001087	2567	orf19.1028	1.11031	0.415095	1.11031
CAL0004010	3347	orf19.255	-1.07488	0.40188	1.07488
CAL0006026	5520	orf19.3599	-0.218374	0.081676	0.218374
CAL0003813	3243	orf19.986	0.40569	0.15179	0.40569
CAL0000602	162	orf19.52	2.49067	0.933383	2.49067
CAL0002763	5581	orf19.1202	0.798897	0.300301	0.798897
CAL0005904	4545	orf19.3542	-1.00611	0.378325	1.00611
CAL0002954	1986	orf19.1254	-0.282716	0.106322	0.282716
CAL0001475	3877	orf19.2414	-0.583963	0.219647	0.583963
CAL0006126	5508	orf19.2980	-1.07237	0.403899	1.07237
CAL0005311	1649	orf19.4811	0.516829	0.194738	0.516829
CAL0002669	999	orf19.1972	0.60536	0.229309	0.60536
CAL0006403	2005	orf19.1634	-0.647726	0.245385	0.647726
CAL0002279	1782	orf19.5817	-0.556661	0.210898	0.556661
CAL0004216	2598	orf19.3391	-0.239748	0.090855	0.239748
CAF0007034	5278	orf19.5213.2	0.322997	0.122404	0.322997
CAL0000261	5649	orf19.4257	0.325997	0.123566	0.325997
CAL0002977	1322	orf19.3941	-0.436236	0.165693	0.436236
CAL0006215	3147	orf19.5567	-0.697716	0.265346	0.697716
CAL0001328	3880	orf19.3004	0.858862	0.326745	0.858862
CAL0001688	1758	orf19.5058	-0.264773	0.10095	0.264773
CAL0000625	1961	orf19.6298	-0.619221	0.236262	0.619221
CAL0005520	515	orf19.4892	0.619194	0.236332	0.619194
CAL0004912	3874	orf19.4079	-0.374307	0.142984	0.374307
CAL0003469	4491	orf19.2651	0.329265	0.125817	0.329265
CAL0003717	1849	orf19.4650	0.583748	0.223119	0.583748
CAL0002691	2261	orf19.5181	3.21541	1.23192	3.21541
CAL0001578	4464	orf19.1804	0.952136	0.365047	0.952136
CAL0005435	1879	orf19.1522	-0.329295	0.126883	0.329295
CAL0002467	115	orf19.2547	0.878039	0.339122	0.878039
CAL0003977	1781	orf19.6621	0.628949	0.243482	0.628949
CAL0002835	5791	orf19.1224	1.19496	0.462641	1.19496
CAL0000594	5573	orf19.5628	0.527192	0.204252	0.527192
CAL0000714	996	orf19.2330	0.356739	0.138606	0.356739
CAL0005316	380	orf19.4816	0.931993	0.36362	0.931993
CAL0006310	3090	orf19.4948	0.797582	0.311386	0.797582
CAL0003882	547	orf19.1362	2.2517	0.87924	2.2517
CAL0001113	2422	orf19.1031	-0.322747	0.126118	0.322747
CAL0000467	5212	orf19.3684	1.34638	0.526585	1.34638
CAL0006331	1788	orf19.4954	-0.494407	0.193707	0.494407
CAL0003502	5514	orf19.5213	-0.606226	0.237666	0.606226
CAL0001851	7	orf19.4447	0.415029	0.16308	0.415029
CAL0004251	4243	orf19.2760	0.443742	0.174404	0.443742
CAL0001349	3293	orf19.6359	-0.749109	0.295001	0.749109
CAL0003589	3437	orf19.4606	-0.43393	0.170968	0.43393
CAL0005824	3936	orf19.6860	-0.685914	0.272077	0.685914
CAL0005609	6015	orf19.422	1.02524	0.406723	1.02524
CAL0003681	2195	orf19.5296	0.627513	0.249615	0.627513
CAL0005902	2097	orf19.3541	0.492059	0.196262	0.492059
CAL0002005	3184	orf19.1143	-0.993906	0.396969	0.993906
CAL0001208	5060	orf19.1065	-0.295084	0.118079	0.295084
CAL0002451	4519	orf19.3197	-1.24874	0.50022	1.24874
CAL0000245	5140	orf19.4250	0.519576	0.208284	0.519576
CAL0001097	1423	orf19.675	0.378008	0.151587	0.378008
CAL0001612	2694	orf19.2478	0.884597	0.355351	0.884597
CAL0001998	3950	orf19.1140	-0.51534	0.207321	0.51534
CAL0000276	3802	orf19.3604	-1.25331	0.504326	1.25331
CAL0003822	4123	orf19.1342	0.241076	0.09703	0.241076
CAL0003580	359	orf19.908	-0.997545	0.401674	0.997545
CAL0001010	4144	orf19.646	0.247723	0.099945	0.247723
CAL0004755	5884	orf19.337	0.540234	0.218149	0.540234
CAL0003947	3092	orf19.230	1.3391	0.543341	1.3391
CAL0000687	1864	orf19.5660	1.28342	0.520921	1.28342
CAL0002503	4286	orf19.1907	0.568167	0.23067	0.568167
CAL0001140	5322	orf19.4381	-0.437154	0.177856	0.437154
CAL0003919	4203	orf19.223	-0.651938	0.265318	0.651938
CAL0004783	1078	orf19.1499	-0.786221	0.320172	0.786221
CAL0001967	3953	orf19.1137	-0.521869	0.212559	0.521869
CAL0001262	6112	orf19.6315	-1.93058	0.786839	1.93058
CAL0005603	2065	orf19.1575	-0.708794	0.28925	0.708794
CAL0005275	3691	orf19.2111	-0.61424	0.250928	0.61424
CAL0005815	1496	orf19.4173	-2.00331	0.819097	2.00331
CAL0004916	1575	orf19.382	0.271859	0.111226	0.271859
CAL0002857	14	orf19.3912	-0.661772	0.2708	0.661772
CAL0000059	1601	orf19.4204	0.629814	0.25779	0.629814
CAL0004714	1934	orf19.328	-0.930903	0.381632	0.930903
CAL0001075	5537	orf19.4365	0.673562	0.276481	0.673562
CAL0002367	2566	orf19.2508	2.25939	0.929792	2.25939
CAL0005868	4222	orf19.3530	0.91757	0.377805	0.91757
CAL0002524	1190	orf19.2575	0.640402	0.263726	0.640402
CAL0003673	5206	orf19.5292	-0.430082	0.177175	0.430082
CAL0004045	799	orf19.3304	0.648695	0.267354	0.648695
CAL0005150	38	orf19.2850	-0.257658	0.10626	0.257658
CAL0004180	2910	orf19.2710	0.802792	0.331179	0.802792
CAL0000460	2307	orf19.6225	0.667844	0.27553	0.667844
CAL0000277	4735	orf19.567	-0.935826	0.386552	0.935826
CAL0004171	1301	orf19.3363	-0.437457	0.180715	0.437457
CAL0003178	5702	orf19.3999	-1.48612	0.614302	1.48612
CAL0003632	1010	orf19.927	-1.98949	0.822611	1.98949
CAL0002245	4285	orf19.5801	0.51334	0.212546	0.51334
CAL0001529	5560	orf19.2439	0.498551	0.206933	0.498551
CAL0003452	4211	orf19.2641	1.1864	0.494982	1.1864
CAL0003844	1612	orf19.993	0.454501	0.190038	0.454501
CAL0005703	5753	orf19.448	0.347349	0.145354	0.347349
CAL0003995	5860	orf19.6628	1.54976	0.649052	1.54976
CAL0003196	2987	orf19.3205	-0.702872	0.294477	0.702872
CAL0005126	1425	orf19.6041	0.66166	0.278216	0.66166
CAL0001368	2227	orf19.6369	0.883709	0.371725	0.883709
CAL0001243	3568	orf19.3763	1.74201	0.734146	1.74201
CAL0001703	3093	orf19.705	1.75361	0.739363	1.75361
CAL0005940	4637	orf19.2901	-0.397421	0.167698	0.397421
CAL0002895	3167	orf19.3920	0.929732	0.392984	0.929732
CAL0004354	5543	orf19.2021	0.793414	0.335414	0.793414
CAL0004475	2104	orf19.4751	0.55717	0.23575	0.55717
CAL0000092	524	orf19.519	-1.11882	0.473457	1.11882
CAL0001864	3510	orf19.754	0.328474	0.139169	0.328474
CAL0002445	950	orf19.3193	-0.519365	0.220233	0.519365
CAL0005497	5448	orf19.4883	1.78301	0.756465	1.78301
CAL0001312	2447	orf19.3796	-0.309362	0.131279	0.309362
CAL0006196	5944	orf19.4901	1.65585	0.702904	1.65585
CAL0005616	5433	orf19.425	0.886913	0.376784	0.886913
CAL0005859	4861	orf19.4188	-0.546164	0.232609	0.546164
CAL0001857	1469	orf19.1107	1.29676	0.554587	1.29676
CAL0006415	1027	orf19.2296	0.259874	0.111237	0.259874
CAL0004162	5089	orf19.3358	-0.528398	0.226865	0.528398
CAL0002447	5375	orf19.2538	0.574303	0.246718	0.574303
CAL0002486	1361	orf19.5101	-0.532395	0.228746	0.532395
CAL0001329	2815	orf19.6348	0.76857	0.33107	0.76857
CAL0002808	5376	orf19.862	-1.06785	0.460736	1.06785
CAL0005012	3199	orf19.3456	-1.39929	0.60383	1.39929
CAL0002566	2958	orf19.2594	-0.394962	0.170445	0.394962
CAL0002321	3948	orf19.3148	1.31563	0.567926	1.31563
CAL0002754	6078	orf19.847	-0.874808	0.378276	0.874808
CAL0000869	4368	orf19.1753	-0.466496	0.201938	0.466496
CAL0002583	3122	orf19.1942	1.06243	0.461843	1.06243
CAL0001921	5482	orf19.4468	0.508523	0.221432	0.508523
CAL0000877	5910	orf19.603	-1.11566	0.486094	1.11566
CAL0004322	2930	orf19.2007	-0.564572	0.246077	0.564572
CAL0003038	4236	orf19.6506	-1.53258	0.668161	1.53258
CAL0002406	2734	orf19.2520	-0.351632	0.153463	0.351632
CAL0001795	2580	orf19.1886	0.493886	0.216032	0.493886
CAL0001572	5169	orf19.1800	1.09431	0.478675	1.09431
CAL0002741	5625	orf19.1994	-0.988966	0.432664	0.988966
CAL0002481	5218	orf19.2555	0.611773	0.268477	0.611773
CAL0006000	439	orf19.3585	-1.40313	0.616032	1.40313
CAL0001731	2410	orf19.1864	-0.393657	0.172872	0.393657
CAL0001071	5997	orf19.3707	-0.277016	0.121944	0.277016
CAL0000009	5450	orf19.4983	0.660058	0.290884	0.660058
CAL0001103	855	orf19.4371	0.196435	0.086592	0.196435
CAL0003888	6066	orf19.1368	-1.76204	0.779463	1.76204
CAL0003697	4552	orf19.1300	0.837089	0.370731	0.837089
CAL0005899	405	orf19.6883	0.522924	0.231678	0.522924
CAL0006418	3004	orf19.2299	-0.464685	0.206175	0.464685
CAL0002981	1767	orf19.3946	0.910701	0.404118	0.910701
CAL0003175	3660	orf19.3996	0.858419	0.381595	0.858419
CAL0000990	1857	orf19.4337	0.658484	0.29312	0.658484
CAL0004334	1785	orf19.2014	0.248328	0.110656	0.248328
CAL0001012	4062	orf19.4341	-0.55255	0.246277	0.55255
CAF0006895	4433	orf19.410.3	-0.63655	0.283739	0.63655
CAL0002657	1365	orf19.4516	1.03623	0.461988	1.03623
CAL0004454	3553	orf19.4746	-0.295418	0.131804	0.295418
CAL0000581	4779	orf19.5620	0.438346	0.195793	0.438346
CAL0005818	5897	orf19.3519	2.59564	1.16011	2.59564
CAL0000103	3894	orf19.1670	0.720207	0.321981	0.720207
CAL0001606	70	orf19.2473	-0.600491	0.268635	0.600491
CAF0007440	3276	orf19.2018.1	-1.47599	0.660589	1.47599
CAL0004220	76	orf19.3393	0.425649	0.190666	0.425649
CAL0001409	6002	orf19.3043	1.47871	0.662617	1.47871
CAL0005976	1145	orf19.2919	0.588797	0.264143	0.588797
CAL0002646	3449	orf19.815	-1.14089	0.512023	1.14089
CAL0001633	5552	orf19.2484	0.511656	0.229728	0.511656
CAL0005371	4608	orf19.2156	-0.701568	0.316175	0.701568
CAL0004346	1462	orf19.4704	0.203258	0.091681	0.203258
CAL0002164	1031	orf19.1199	-0.224706	0.101468	0.224706
CAL0005629	4603	orf19.4122	-1.2549	0.568179	1.2549
CAL0000607	3263	orf19.57	-0.636137	0.288155	0.636137
CAF0006945	3104	orf19.2318.1	-0.953815	0.43215	0.953815
CAL0000273	1231	orf19.3603	-0.713118	0.324618	0.713118
CAL0006136	526	orf19.5530	-0.367038	0.16712	0.367038
CAL0004203	5042	orf19.2727	-0.751639	0.342916	0.751639
CAL0004557	1543	orf19.4777	0.20091	0.091672	0.20091
CAL0001333	1150	orf19.3008	0.504731	0.230473	0.504731
CAL0006040	1012	orf19.2947	0.304266	0.1391	0.304266
CAL0001324	3593	orf19.3002	-0.393667	0.18045	0.393667
CAL0003659	1633	orf19.934	-0.988324	0.453392	0.988324
CAL0001325	4564	orf19.6346	-0.888909	0.40859	0.888909
CAL0000992	1354	orf19.4339	-0.509246	0.234198	0.509246
CAL0006139	3033	orf19.5533	-0.650477	0.299312	0.650477
CAL0001417	4854	orf19.5730	-0.695799	0.320412	0.695799
CAF0006963	1579	orf19.2711.1	0.732256	0.337327	0.732256
CAL0005779	5930	orf19.4162	1.03532	0.477637	1.03532
CAL0001337	3716	orf19.6353	2.20459	1.01735	2.20459
CAL0003199	536	orf19.3207	-0.790682	0.36491	0.790682
CAL0001410	3298	orf19.6387	-0.330391	0.152827	0.330391
CAL0002044	3779	orf19.1153	-0.247071	0.114398	0.247071
CAL0001674	5253	orf19.1841	0.926034	0.429001	0.926034
CAL0000590	4588	orf19.5626	1.50852	0.698857	1.50852
CAL0003102	765	orf19.1291	0.493917	0.229289	0.493917
CAL0004217	2789	orf19.2736	-0.424031	0.196866	0.424031
CAL0001608	5773	orf19.2474	0.503632	0.233893	0.503632
CAL0003518	2113	orf19.5220	1.82282	0.846996	1.82282
CAL0000685	5406	orf19.88	-0.425126	0.197743	0.425126
CAL0001770	5377	orf19.1878	0.809619	0.376759	0.809619
CAL0001396	1589	orf19.5723	1.43108	0.666552	1.43108
CAL0001300	3259	orf19.3787	0.344385	0.160529	0.344385
CAL0001464	2039	orf19.5750	0.248249	0.11574	0.248249
CAL0001384	3496	orf19.6375	0.435524	0.203093	0.435524
CAL0002867	1960	orf19.879	-0.913492	0.427069	0.913492
CAL0005222	1347	orf19.2884	0.30654	0.143439	0.30654
CAL0001204	2348	orf19.3749	-2.58353	1.20895	2.58353
CAL0004091	5297	orf19.3322	-0.274856	0.128866	0.274856
CAL0000854	151	orf19.1742	1.14372	0.536309	1.14372
CAL0002653	4066	orf19.5170	-0.531747	0.249678	0.531747
CAL0002685	64	orf19.828	0.248689	0.116786	0.248689
CAL0004407	2114	orf19.4728	-0.44207	0.20773	0.44207
CAL0001580	1634	orf19.1805	0.414288	0.194679	0.414288
CAL0005543	4044	orf19.407	-0.377423	0.177831	0.377423
CAL0006041	5890	orf19.2948	-0.287121	0.135317	0.287121
CAL0006073	4179	orf19.6167	-0.453341	0.2138	0.453341
CAL0004231	4200	orf19.2746	0.356606	0.168314	0.356606
CAL0000206	5782	orf19.6925	0.230381	0.10893	0.230381
CAL0000666	1823	orf19.2311	0.560814	0.26551	0.560814
CAL0004135	120	orf19.6685	-1.26905	0.600952	1.26905
CAL0004612	4903	orf19.4793	-0.375407	0.177931	0.375407
CAL0005650	1497	orf19.431	-1.27397	0.604034	1.27397
CAL0000007	4078	orf19.4981	1.757	0.833738	1.757
CAL0002984	43	orf19.1261	0.494324	0.234667	0.494324
CAL0001488	1876	orf19.5760	-0.384749	0.182679	0.384749
CAL0000319	2680	orf19.3617	1.19886	0.569941	1.19886
CAL0000187	2139	orf19.1690	-0.281101	0.133822	0.281101
CAF0006920	1670	orf19.1082.1	-0.344985	0.164303	0.344985
CAL0001107	4029	orf19.679	0.665409	0.317314	0.665409
CAL0000875	5387	orf19.600	-0.791985	0.37777	0.791985
CAL0002203	2178	orf19.3894	-1.19107	0.568395	1.19107
CAL0005618	4254	orf19.426	-0.530754	0.253567	0.530754
CAL0001790	514	orf19.1880	0.525832	0.251408	0.525832
CAL0002147	214	orf19.3870	0.25201	0.120569	0.25201
CAL0005303	2189	orf19.2124	1.3286	0.635887	1.3286
CAL0000287	4069	orf19.4264	-1.34677	0.644957	1.34677
CAL0002475	2813	orf19.2551	-0.176021	0.084438	0.176021
CAL0000610	5193	orf19.5630	0.572236	0.274594	0.572236
CAL0005130	679	orf19.6046	1.19837	0.57529	1.19837
CAL0003881	4430	orf19.1361	-0.767626	0.368579	0.767626
CAL0006098	3656	orf19.5519	-0.253814	0.122066	0.253814
CAL0002513	3550	orf19.1910	1.39022	0.669245	1.39022
CAL0000383	2784	orf19.4293	0.462827	0.222856	0.462827
CAL0002076	5727	orf19.1169	1.61677	0.780079	1.61677
CAL0006086	1642	orf19.5510	0.511653	0.247722	0.511653
CAF0006982	4241	orf19.3325.3	0.186138	0.09014	0.186138
CAL0000930	1214	orf19.1773	0.645988	0.312951	0.645988
CAL0002024	782	orf19.794	-0.70511	0.341638	0.70511
CAL0004615	1181	orf19.4795	-1.75531	0.850785	1.75531
CAL0005718	1135	orf19.4146	0.270175	0.130967	0.270175
CAL0000434	5380	orf19.3663	-0.454401	0.220281	0.454401
CAL0005013	3932	orf19.3457	0.595832	0.288853	0.595832
CAL0005097	1349	orf19.6030	0.720937	0.349771	0.720937
CAL0004460	2164	orf19.4748	0.75474	0.366397	0.75474
CAL0006349	3868	orf19.2278	-0.600444	0.291601	0.600444
CAL0002969	186	orf19.107	-0.280713	0.136451	0.280713
CAL0005122	3561	orf19.3496	0.270341	0.13143	0.270341
CAL0004514	4531	orf19.1420	-1.58246	0.769833	1.58246
CAL0001760	5344	orf19.5077	0.304336	0.148184	0.304336
CAL0002101	5973	orf19.1179	-0.438349	0.21364	0.438349
CAL0002599	2014	orf19.1953	0.344204	0.168117	0.344204
CAL0003910	5286	orf19.1374	-1.13933	0.556531	1.13933
CAL0004944	2915	orf19.391	-1.01483	0.496174	1.01483
CAL0000146	3708	orf19.1680	-0.365734	0.179189	0.365734
CAL0001447	5301	orf19.5746	0.172004	0.084361	0.172004
CAL0003720	3529	orf19.1310	-0.992638	0.487138	0.992638
CAL0002299	189	orf19.5823	0.36323	0.178595	0.36323
CAF0006971	3917	orf19.3007.2	0.477141	0.234765	0.477141
CAL0004289	2605	orf19.2785	-0.176016	0.086605	0.176016
CAL0005278	5431	orf19.2113	-0.509678	0.250778	0.509678
CAL0003929	2284	orf19.227	-0.540938	0.266295	0.540938
CAL0003701	2008	orf19.4645	-0.724433	0.356653	0.724433
CAL0001943	4076	orf19.775	-0.84638	0.416704	0.84638
CAF0006913	2975	orf19.873.1	-0.529207	0.26063	0.529207
CAL0001123	959	orf19.4379	0.484844	0.239182	0.484844
CAF0006969	1095	orf19.2959.1	-0.623305	0.308233	0.623305
CAL0002365	4555	orf19.3163	0.784913	0.388494	0.784913
CAL0005364	3418	orf19.2151	-0.353061	0.174985	0.353061
CAL0000597	339	orf19.6286	-0.560826	0.277973	0.560826
CAL0003788	3923	orf19.1332	-1.66478	0.825233	1.66478
CAL0005712	4446	orf19.4143	0.481848	0.239324	0.481848
CAL0002075	493	orf19.1168	-0.302356	0.150386	0.302356
CAL0006382	1241	orf19.2287	0.292568	0.145518	0.292568
CAL0001942	5833	orf19.3812	0.360797	0.179724	0.360797
CAL0003125	3892	orf19.6527	0.974285	0.485536	0.974285
CAL0001411	2414	orf19.3045	-0.607571	0.30285	0.607571
CAL0001003	3236	orf19.640	-1.62835	0.813061	1.62835
CAL0005596	3169	orf19.4118	0.476499	0.237962	0.476499
CAL0001559	2235	orf19.2455	-0.531129	0.265611	0.531129
CAL0002395	5880	orf19.3174	-0.448201	0.224631	0.448201
CAL0005771	527	orf19.4160	-0.949074	0.475857	0.949074
CAL0005798	450	orf19.475	0.53987	0.272993	0.53987
CAL0003534	4624	orf19.2688	-0.200627	0.1015	0.200627
CAL0004377	6059	orf19.2031	0.886401	0.448534	0.886401
CAL0002466	801	orf19.2546	-0.269916	0.136632	0.269916
CAL0004479	329	orf19.4754	0.254309	0.12882	0.254309
CAL0002070	895	orf19.1162	0.516869	0.262348	0.516869
CAL0001698	6029	orf19.700	-0.812855	0.412987	0.812855
CAL0002516	3331	orf19.1913	-0.762322	0.388213	0.762322
CAL0005519	5031	orf19.4890	-0.586344	0.299056	0.586344
CAL0005874	4253	orf19.496	1.22362	0.624831	1.22362
CAL0001219	4782	orf19.3757	0.259979	0.132902	0.259979
CAL0005983	2612	orf19.6126	0.213988	0.109603	0.213988
CAL0003014	5126	orf19.3957	0.551593	0.282771	0.551593
CAL0000972	71	orf19.633	0.476757	0.244727	0.476757
CAL0120626	1038	orf19.2472.1	-0.44065	0.226453	0.44065
CAL0005602	3336	orf19.1574	0.703866	0.362076	0.703866
CAL0002950	4535	orf19.1252	-0.315923	0.162712	0.315923
CAL0006022	4228	orf19.3593	-0.256141	0.132235	0.256141
CAL0006348	5017	orf19.2277	0.723048	0.373349	0.723048
CAL0001192	3165	orf19.1057	-1.19472	0.617154	1.19472
CAL0002043	751	orf19.4496	0.37102	0.191709	0.37102
CAL0002610	3188	orf19.805	0.308214	0.159299	0.308214
CAL0002607	5519	orf19.802	-0.470288	0.243325	0.470288
CAL0004768	3240	orf19.4033	-1.21741	0.629989	1.21741
CAL0005270	93	orf19.2107	0.543688	0.281925	0.543688
CAL0000867	1726	orf19.1750	0.610131	0.316471	0.610131
CAL0004194	4698	orf19.3378	-1.75488	0.911378	1.75488
CAL0003579	1990	orf19.4600	1.40836	0.731664	1.40836
CAL0002232	1714	orf19.6455	-0.693599	0.360624	0.693599
CAL0004860	3971	orf19.3401	0.651091	0.338989	0.651091
CAL0002703	3049	orf19.1981	0.710444	0.370102	0.710444
CAL0001170	3115	orf19.3734	1.64125	0.855856	1.64125
CAL0004118	6169	orf19.297	0.620549	0.323769	0.620549
CAL0001541	5460	orf19.2442	1.1657	0.608299	1.1657
CAL0000624	3271	orf19.6297	-0.550348	0.287464	0.550348
CAL0001486	834	orf19.3077	0.562547	0.294037	0.562547
CAL0006009	1296	orf19.6136	-0.649338	0.339469	0.649338
CAL0005852	1916	orf19.4183	0.546856	0.286084	0.546856
CAL0002660	808	orf19.5174	0.68838	0.360128	0.68838
CAL0002426	5513	orf19.3188	-0.56413	0.295217	0.56413
CAL0004252	2174	orf19.2761	0.412446	0.215861	0.412446
CAL0002202	509	orf19.3893	-0.325514	0.170367	0.325514
CAL0004034	3546	orf19.6643	-0.887451	0.465219	0.887451
CAL0006141	381	orf19.5534	0.949184	0.49792	0.949184
CAL0004301	46	orf19.2791	0.333176	0.174802	0.333176
CAL0004048	5819	orf19.6649	-1.30215	0.68335	1.30215
CAF0007442	1243	orf19.2237.1	-1.16163	0.610265	1.16163
CAL0002295	523	orf19.3138	-0.362783	0.190863	0.362783
CAF0007036	4026	orf19.5225.2	-0.296744	0.156137	0.296744
CAL0004524	3397	orf19.4768	2.55212	1.34451	2.55212
CAL0006129	1544	orf19.2983	-0.329588	0.17365	0.329588
CAL0000357	3796	orf19.3629	0.370735	0.195527	0.370735
CAL0001390	1724	orf19.3035	0.64272	0.339151	0.64272
CAL0001393	5021	orf19.3038	-0.413924	0.218425	0.413924
CAL0001037	1120	orf19.4353	-0.634128	0.334742	0.634128
CAL0005223	353	orf19.2885	-0.843412	0.445278	0.843412
CAL0000813	5896	orf19.2385	-0.350298	0.185026	0.350298
CAL0000361	2095	orf19.590	0.596135	0.315186	0.596135
CAL0001555	2177	orf19.5796	0.874073	0.462234	0.874073
CAL0001385	4342	orf19.5719	0.865202	0.457847	0.865202
CAL0004144	2536	orf19.3348	-0.368211	0.195222	0.368211
CAL0005989	3515	orf19.2923	-1.38278	0.733224	1.38278
CAL0006014	5104	orf19.2933	0.783701	0.416504	0.783701
CAL0120975	1244	orf19.787.1	-0.421308	0.223918	0.421308
CAF0007105	4369	orf19.2661	1.29584	0.69007	1.29584
CAL0004189	1117	orf19.2717	-0.27479	0.14646	0.27479
CAL0004384	5318	orf19.5377	-0.832903	0.444092	0.832903
CAL0004684	5243	orf19.4016	-0.386939	0.206719	0.386939
CAL0000008	4760	orf19.4982	-0.699686	0.373945	0.699686
CAL0005917	1747	orf19.6893	-0.45291	0.242213	0.45291
CAL0004389	3939	orf19.2036	-0.526249	0.281806	0.526249
CAL0003812	2748	orf19.985	-0.498156	0.266787	0.498156
CAL0005039	2599	orf19.3467	-0.357251	0.191762	0.357251
CAL0006324	3576	orf19.2268	0.338377	0.181662	0.338377
CAL0000353	5340	orf19.4283	0.393135	0.211102	0.393135
CAL0004177	4295	orf19.3367	0.182982	0.098269	0.182982
CAL0001791	600	orf19.5089	-1.33115	0.715142	1.33115
CAL0001295	2032	orf19.3781	-1.56678	0.842928	1.56678
CAL0003071	1710	orf19.132	0.935961	0.504343	0.935961
CAL0004952	5596	orf19.3431	-1.19068	0.642043	1.19068
CAL0004445	2842	orf19.4740	1.59956	0.862545	1.59956
CAL0001369	1965	orf19.3026	0.558185	0.30143	0.558185
CAL0005685	3068	orf19.1598	-0.711755	0.384529	0.711755
CAL0005524	3881	orf19.4895	-0.634054	0.343431	0.634054
CAL0003492	6097	orf19.2663	0.693214	0.376049	0.693214
CAL0005136	5686	orf19.2842	0.329188	0.178711	0.329188
CAL0003665	995	orf19.4631	0.333387	0.181189	0.333387
CAL0006077	3844	orf19.2961	0.829478	0.451143	0.829478
CAL0002912	2183	orf19.4585	0.373927	0.203507	0.373927
CAL0004137	790	orf19.6686	0.362817	0.197624	0.362817
CAL0004243	3754	orf19.5300	-0.535666	0.291929	0.535666
CAL0001342	4117	orf19.3012	0.813845	0.443852	0.813845
CAL0000703	4795	orf19.91	-0.772998	0.421654	0.772998
CAL0006379	5255	orf19.1628	-0.277888	0.1517	0.277888
CAL0003510	2277	orf19.2671	0.876238	0.478431	0.876238
CAL0002089	4033	orf19.3854	0.514122	0.280881	0.514122
CAL0005360	1565	orf19.5493	0.43602	0.238614	0.43602
CAL0000885	4348	orf19.4301	-0.351345	0.192517	0.351345
CAL0006102	5935	orf19.2970	-0.222905	0.122208	0.222905
CAL0005997	2733	orf19.2928	0.687202	0.37705	0.687202
CAL0004421	3669	orf19.4731	0.83714	0.459455	0.83714
CAL0000316	2021	orf19.3616	-0.334755	0.183996	0.334755
CAL0003862	6135	orf19.4699	1.12741	0.621161	1.12741
CAL0003625	5837	orf19.920	0.817419	0.450473	0.817419
CAL0006619	3288	orf19.2158	-0.338535	0.18671	0.338535
CAL0001144	3124	orf19.689	1.3442	0.742308	1.3442
CAL0001522	1280	orf19.3091	0.417175	0.230613	0.417175
CAL0001270	1957	orf19.3773	0.453816	0.250905	0.453816
CAL0003444	2688	orf19.3295	-0.627454	0.347097	0.627454
CAL0005739	488	orf19.4150	-1.82103	1.00746	1.82103
CAL0001667	1784	orf19.5042	-1.19447	0.660881	1.19447
CAL0003208	5274	orf19.173	-0.459164	0.25406	0.459164
CAL0000443	2247	orf19.6214	1.12933	0.625334	1.12933
CAF0006934	234	orf19.2107.1	0.641048	0.355003	0.641048
CAL0002282	5418	orf19.5818	0.654179	0.362775	0.654179
CAL0001723	5480	orf19.5066	-0.432207	0.239928	0.432207
CAL0003550	3725	orf19.2695	-0.428546	0.23793	0.428546
CAL0002613	1380	orf19.808	0.397859	0.221077	0.397859
CAL0004568	4745	orf19.2095	0.323094	0.179656	0.323094
CAL0005219	3646	orf19.2881	-0.343865	0.191435	0.343865
CAL0001341	1502	orf19.6355	0.234416	0.130504	0.234416
CAL0004410	5281	orf19.2043	1.41441	0.788284	1.41441
CAL0000471	1668	orf19.3688	0.552704	0.308073	0.552704
CAL0001478	3201	orf19.2415	-0.539582	0.301011	0.539582
CAL0003626	4505	orf19.921	-0.396151	0.221228	0.396151
CAL0002338	5466	orf19.3152	-0.953996	0.533299	0.953996
CAL0006396	5211	orf19.1630	-0.638836	0.357139	0.638836
CAL0001873	3334	orf19.1111	-0.514162	0.287895	0.514162
CAL0005111	139	orf19.2834	-0.646996	0.362545	0.646996
CAL0005055	2652	orf19.3470	0.473136	0.265167	0.473136
CAL0001138	5692	orf19.3724	0.460282	0.258004	0.460282
CAL0002289	370	orf19.6477	0.464354	0.260337	0.464354
CAL0004911	2940	orf19.4078	0.425971	0.238845	0.425971
CAL0002490	3661	orf19.5105	0.549825	0.30836	0.549825
CAF0006947	2547	orf19.2329.1	-0.170684	0.095778	0.170684
CAL0000661	5364	orf19.5650	0.237017	0.133241	0.237017
CAL0002774	5159	orf19.850	-0.672292	0.378212	0.672292
CAL0005089	3372	orf19.2828	0.944493	0.533172	0.944493
CAL0005100	2054	orf19.6033	0.804224	0.454117	0.804224
CAL0000715	3440	orf19.5674	0.718997	0.406382	0.718997
CAL0006095	5055	orf19.5517	0.298204	0.168599	0.298204
CAL0002662	1321	orf19.5175	0.441971	0.249886	0.441971
CAL0001719	1025	orf19.4407	0.698375	0.394916	0.698375
CAL0001118	4730	orf19.1033	-0.462421	0.261657	0.462421
CAL0003780	5976	orf19.4670	0.727482	0.412389	0.727482
CAL0005673	6094	orf19.4135	1.53819	0.872125	1.53819
CAL0006130	1826	orf19.2984	-0.683667	0.387958	0.683667
CAL0005879	1444	orf19.4190	-0.88112	0.500439	0.88112
CAL0003648	3403	orf19.4628	-0.781162	0.443888	0.781162
CAL0000649	1285	orf19.2306	-0.370052	0.21028	0.370052
CAL0002448	2319	orf19.3195	-0.489774	0.27842	0.489774
CAL0002350	2696	orf19.5843	-1.05677	0.601258	1.05677
CAL0000278	15	orf19.6948	0.442249	0.251662	0.442249
CAL0001165	1404	orf19.3732	0.39509	0.224992	0.39509
CAL0005847	4826	orf19.6869	0.470196	0.267833	0.470196
CAF0007024	2009	orf19.4862.2	0.472735	0.269653	0.472735
CAL0006366	629	orf19.1622	-0.55245	0.315157	0.55245
CAL0003069	4379	orf19.131	-1.23974	0.707323	1.23974
CAL0001681	5241	orf19.5050	1.46159	0.834627	1.46159
CAL0005530	3609	orf19.1555	-0.307515	0.175735	0.307515
CAL0002723	2510	orf19.4534	0.424724	0.243059	0.424724
CAL0001432	3129	orf19.3053	0.207049	0.118498	0.207049
CAL0000509	3643	orf19.18	0.314443	0.180096	0.314443
CAL0000613	5597	orf19.5633	-1.44913	0.830085	1.44913
CAL0000293	3107	orf19.4268	-0.306872	0.176133	0.306872
CAL0005086	3260	orf19.3482	0.452087	0.259529	0.452087
CAL0006323	4271	orf19.2267	-0.446426	0.256416	0.446426
CAL0004533	3174	orf19.2088	-0.506694	0.291173	0.506694
CAL0004235	1257	orf19.2751	-0.731529	0.420848	0.731529
CAL0002648	4542	orf19.4510	1.73648	0.999944	1.73648
CAL0004059	4239	orf19.273	-0.429671	0.24754	0.429671
CAL0006327	932	orf19.4951	0.713804	0.411298	0.713804
CAL0002875	2527	orf19.1232	0.42466	0.244831	0.42466
CAL0005252	3816	orf19.2895	-0.252775	0.145893	0.252775
CAL0004339	4546	orf19.2018	-0.61802	0.356805	0.61802
CAL0001085	786	orf19.1026	-0.245919	0.141992	0.245919
CAL0003530	3570	orf19.2682	-0.224708	0.129762	0.224708
CAF0007002	2783	orf19.4149.1	-0.154203	0.089088	0.154203
CAL0004701	1441	orf19.323	-0.465869	0.269269	0.465869
CAL0001537	3972	orf19.2440	0.684994	0.395975	0.684994
CAL0003702	3654	orf19.1303	0.433387	0.250595	0.433387
CAL0000418	1409	orf19.3653	0.504359	0.291963	0.504359
CAL0004618	3781	orf19.4798	0.345119	0.200042	0.345119
CAL0002631	4952	orf19.5168	-1.91132	1.10946	1.91132
CAL0002687	5465	orf19.829	0.448577	0.260466	0.448577
CAL0004174	6136	orf19.2709	-0.320658	0.186194	0.320658
CAL0002701	5512	orf19.5188	0.57418	0.333726	0.57418
CAL0005319	5417	orf19.2131	-1.84509	1.07372	1.84509
CAL0003402	4184	orf19.2621	-0.596257	0.347064	0.596257
CAL0001601	4769	orf19.1814	-0.276902	0.161257	0.276902
CAL0000438	1728	orf19.3667	-0.715121	0.416533	0.715121
CAL0002275	2586	orf19.5814	-1.00843	0.588972	1.00843
CAL0002589	1532	orf19.1949	-0.192802	0.112612	0.192802
CAL0000337	1050	orf19.3622	-1.36915	0.800689	1.36915
CAL0001780	2722	orf19.729	-1.63855	0.958728	1.63855
CAL0004775	1776	orf19.1490	-0.795167	0.46591	0.795167
CAL0004382	5966	orf19.5376	-0.878712	0.514901	0.878712
CAL0000889	2205	orf19.4304	0.370037	0.21689	0.370037
CAL0005820	5347	orf19.4176	0.442532	0.259703	0.442532
CAL0002507	140	orf19.5110	1.03879	0.609862	1.03879
CAL0002990	6095	orf19.1267	0.271252	0.159741	0.271252
CAL0002864	5081	orf19.3915	0.233658	0.137655	0.233658
CAL0000603	2851	orf19.53	0.421697	0.24915	0.421697
CAL0002738	2934	orf19.1991	0.382031	0.226092	0.382031
CAL0003884	1745	orf19.1364	-0.461387	0.273091	0.461387
CAL0000015	4070	orf19.1643	-0.782919	0.463533	0.782919
CAF0006929	5067	orf19.1738.1	-0.365621	0.216568	0.365621
CAF0006914	4139	orf19.913.2	0.659796	0.39116	0.659796
CAL0000468	4969	orf19.3685	0.71064	0.421303	0.71064
CAL0005807	2303	orf19.478	1.92578	1.14216	1.92578
CAL0000609	4835	orf19.59	0.216616	0.128504	0.216616
CAL0002947	2073	orf19.1251	0.386046	0.229128	0.386046
CAL0001347	5590	orf19.6358	0.639076	0.37952	0.639076
CAL0004136	499	orf19.3342	-0.484836	0.288059	0.484836
CAL0000895	5231	orf19.4309	-0.405318	0.24105	0.405318
CAL0000713	6144	orf19.5673	-1.10267	0.655846	1.10267
CAL0002272	4554	orf19.5812	-0.294428	0.175173	0.294428
CAL0002006	414	orf19.1144	0.310245	0.184817	0.310245
CAL0005941	181	orf19.2903	-0.532375	0.317625	0.532375
CAL0001427	13	orf19.6393	-0.524493	0.313079	0.524493
CAL0003726	2209	orf19.1313	-1.64824	0.985117	1.64824
CAL0000462	648	orf19.6229	-0.344752	0.206255	0.344752
CAL0000673	4534	orf19.5658	1.05186	0.629359	1.05186
CAL0000619	556	orf19.6293	-0.206886	0.12382	0.206886
CAL0002027	6085	orf19.796	0.664532	0.397917	0.664532
CAL0002229	2621	orf19.3110	1.34301	0.804615	1.34301
CAL0001662	1378	orf19.2496	0.533571	0.319675	0.533571
CAL0001392	1148	orf19.3037	0.233458	0.139918	0.233458
CAL0000141	5922	orf19.4225	0.263129	0.157803	0.263129
CAL0001272	5641	orf19.3775	-0.315741	0.189392	0.315741
CAL0006276	1311	orf19.4932	0.21104	0.12672	0.21104
CAL0004902	2132	orf19.3415	0.438056	0.263302	0.438056
CAL0000701	5873	orf19.2328	0.301607	0.181359	0.301607
CAL0002670	3037	orf19.1973	0.596551	0.358919	0.596551
CAL0000422	6043	orf19.3656	-0.325345	0.195757	0.325345
CAL0002830	4052	orf19.4565	-0.195881	0.1179	0.195881
	3371	orf19.4632	-0.543821	0.327494	0.543821
CAL0000307	1925	orf19.576	0.759828	0.4578	0.759828
CAL0005059	882	orf19.2818	-0.422339	0.254793	0.422339
CAL0004569	6061	orf19.2097	-1.00124	0.604361	1.00124
CAL0000698	3390	orf19.2325	0.784266	0.47355	0.784266
CAL0001533	717	orf19.3099	-0.246721	0.149124	0.246721
CAL0000859	3743	orf19.1747	0.266949	0.161409	0.266949
CAL0002611	2660	orf19.806	0.365209	0.220895	0.365209
CAL0000842	5059	orf19.2397	-1.16886	0.707329	1.16886
CAL0004112	1295	orf19.3331	-0.596381	0.361047	0.596381
CAL0003276	4533	orf19.194	-0.403204	0.244153	0.403204
CAL0004500	5756	orf19.2077	0.883745	0.535701	0.883745
CAL0002764	1676	orf19.4546	0.565966	0.343101	0.565966
CAL0000144	1753	orf19.4228	-0.293171	0.178176	0.293171
CAL0000693	2098	orf19.5665	0.450358	0.273862	0.450358
CAL0004595	675	orf19.4788	-0.433147	0.263645	0.433147
CAL0004642	673	orf19.4003	-0.767437	0.467338	0.767437
CAL0003523	1123	orf19.5225	0.54866	0.334148	0.54866
CAL0002955	1667	orf19.1255	-0.717881	0.437915	0.717881
CAF0007454	5419	orf19.1409.1	-0.431298	0.263168	0.431298
CAL0006160	4602	orf19.2998	-0.364242	0.222265	0.364242
CAL0004776	2626	orf19.1491	-0.625913	0.382142	0.625913
CAL0001831	551	orf19.740	0.46952	0.286794	0.46952
CAL0006244	5500	orf19.5578	-0.454767	0.277839	0.454767
CAL0001600	2287	orf19.1813	0.243488	0.149002	0.243488
CAL0001244	2478	orf19.3764	-0.987381	0.605157	0.987381
CAL0003106	5330	orf19.1296	0.605367	0.371908	0.605367
CAL0001840	4073	orf19.748	0.241394	0.148314	0.241394
CAL0001000	5173	orf19.1797	0.827284	0.50832	0.827284
CAL0001809	5329	orf19.4432	1.11366	0.685203	1.11366
CAL0002686	581	orf19.4522	-0.692117	0.426639	0.692117
CAL0004320	1183	orf19.2005	-0.232342	0.143471	0.232342
CAL0001309	4811	orf19.3793	0.524324	0.323835	0.524324
CAL0004049	4798	orf19.269	0.266643	0.164999	0.266643
CAL0005508	620	orf19.4889	0.445633	0.275943	0.445633
CAL0006024	2213	orf19.3594	0.948217	0.587872	0.948217
CAL0000763	2163	orf19.1706	0.306192	0.189912	0.306192
CAL0001798	5611	orf19.1889	0.253944	0.157697	0.253944
CAL0000478	4242	orf19.6235	-0.695559	0.432263	0.695559
CAL0004585	4485	orf19.4783	-1.25048	0.77828	1.25048
CAL0001881	3925	orf19.4459	-0.538592	0.335632	0.538592
CAL0004935	5868	orf19.3428	0.522106	0.325379	0.522106
CAL0003642	5469	orf19.4625	-0.693828	0.432674	0.693828
CAL0000210	5214	orf19.6927	-0.413053	0.257753	0.413053
CAL0002071	35	orf19.1163	1.97277	1.23139	1.97277
CAL0003024	4656	orf19.1279	0.290471	0.181371	0.290471
CAL0001870	65	orf19.758	-1.43511	0.896376	1.43511
CAL0006004	3338	orf19.6131	-0.37238	0.232786	0.37238
CAL0000893	3043	orf19.4307	0.942898	0.590808	0.942898
CAL0005317	4159	orf19.4817	-0.604325	0.378667	0.604325
CAL0004588	5716	orf19.1442	0.400694	0.251084	0.400694
CAL0001001	1517	orf19.1798	0.501442	0.314566	0.501442
CAL0005881	3987	orf19.3535	-0.722122	0.453965	0.722122
CAL0004221	1383	orf19.2738	-1.03697	0.651978	1.03697
CAL0002842	4043	orf19.1229	-0.268549	0.168902	0.268549
CAL0004234	5515	orf19.2749	0.89134	0.560655	0.89134
CAL0004364	606	orf19.2026	-0.657078	0.413368	0.657078
CAL0002806	1094	orf19.861	1.0996	0.692428	1.0996
CAL0003035	538	orf19.125	0.915343	0.577278	0.915343
CAL0002510	2900	orf19.5114	0.863575	0.54494	0.863575
CAL0004546	393	orf19.4772	0.433627	0.274833	0.433627
CAL0004492	3431	orf19.4759	0.777597	0.493132	0.777597
CAL0002403	2330	orf19.5861	-0.266965	0.169658	0.266965
CAL0001579	1798	orf19.2461	0.366136	0.233022	0.366136
CAL0005061	1363	orf19.2819	-1.57668	1.00365	1.57668
CAL0002735	2264	orf19.5197	-0.191308	0.121795	0.191308
CAL0005438	5908	orf19.4867	-0.328925	0.209448	0.328925
CAL0001157	5052	orf19.1047	0.329553	0.210004	0.329553
CAL0004705	4694	orf19.325	-0.350353	0.223353	0.350353
CAL0004434	4046	orf19.4738	0.471933	0.300916	0.471933
CAL0002414	5608	orf19.2524	-0.224325	0.143105	0.224325
CAL0000656	4351	orf19.73	-0.401804	0.256477	0.401804
CAL0006150	4016	orf19.5539	0.589422	0.376459	0.589422
CAL0001685	1648	orf19.5054	-0.316189	0.20197	0.316189
CAL0001772	563	orf19.721	-0.406188	0.259593	0.406188
CAL0001457	1445	orf19.2407	0.351734	0.224957	0.351734
CAL0003960	1619	orf19.238	0.23111	0.14783	0.23111
CAL0002711	4345	orf19.831	0.385345	0.246665	0.385345
CAL0002364	829	orf19.2506	-2.00663	1.28588	2.00663
CAL0004762	4946	orf19.339	0.484018	0.310445	0.484018
CAL0001584	1262	orf19.1808	0.567676	0.364267	0.567676
CAL0003388	2719	orf19.2618	-0.446898	0.286803	0.446898
CAL0002370	4732	orf19.3167	0.568054	0.364607	0.568054
CAL0002269	2903	orf19.3128	0.229865	0.147732	0.229865
CAL0001031	631	orf19.655	-0.163851	0.105438	0.163851
CAL0002092	565	orf19.3858	-0.646498	0.416031	0.646498
CAL0004002	899	orf19.251	-0.255476	0.164426	0.255476
CAL0001022	5992	orf19.4349	-0.246469	0.158685	0.246469
CAL0004007	3195	orf19.254	-1.11439	0.717612	1.11439
CAL0003359	2028	orf19.2606	-0.378757	0.243969	0.378757
CAL0004226	1865	orf19.3399	-0.460414	0.296659	0.460414
CAL0005849	452	orf19.3526	-0.786531	0.506813	0.786531
CAL0005287	4610	orf19.4801	0.840595	0.542	0.840595
CAL0001665	3493	orf19.5040	0.65018	0.419771	0.65018
CAL0006049	5844	orf19.2951	-0.416085	0.268838	0.416085
CAF0006921	138	orf19.1267.1	0.330573	0.213755	0.330573
CAL0001128	4508	orf19.680	0.306759	0.198475	0.306759
CAL0005329	3956	orf19.2138	0.115394	0.074666	0.115394
CAL0002765	2735	orf19.1203	-0.705625	0.457827	0.705625
CAL0003245	6143	orf19.184	-1.09324	0.710392	1.09324
CAL0005379	2523	orf19.4845	-0.259289	0.168655	0.259289
CAL0001395	4060	orf19.5722	-0.395854	0.257613	0.395854
CAL0005352	4626	orf19.4831	-0.430211	0.280115	0.430211
CAL0002361	2435	orf19.3161	0.347945	0.226685	0.347945
CAL0002353	3487	orf19.2501	-0.471578	0.307275	0.471578
CAL0005563	3048	orf19.1563	-0.493458	0.321767	0.493458
CAL0006159	1488	orf19.2996	-0.79554	0.518792	0.79554
CAL0000542	416	orf19.6266	0.513119	0.334658	0.513119
CAL0004918	4373	orf19.384	-0.286246	0.186754	0.286246
CAL0005737	2119	orf19.457	-0.286045	0.186957	0.286045
CAL0000006	3357	orf19.4980	1.36441	0.8918	1.36441
CAL0005461	5650	orf19.4871	0.213038	0.13927	0.213038
CAL0003540	2636	orf19.5235	-0.632786	0.413998	0.632786
CAL0004582	2689	orf19.4780	0.729893	0.478142	0.729893
CAL0005109	1824	orf19.2832	0.357708	0.234496	0.357708
CAL0000477	5165	orf19.6234	0.241406	0.158594	0.241406
CAL0001465	2712	orf19.5751	0.446281	0.293239	0.446281
CAL0001639	5883	orf19.2489	0.193034	0.127081	0.193034
CAL0001344	3426	orf19.3013	-0.441212	0.290856	0.441212
CAL0001209	4013	orf19.1066	0.594674	0.392069	0.594674
CAL0002829	4770	orf19.1221	0.729619	0.481654	0.729619
CAL0000116	5320	orf19.522	-0.348099	0.229851	0.348099
CAL0006053	309	orf19.2956	-0.66504	0.440218	0.66504
CAL0004215	1699	orf19.2735	-0.574216	0.380505	0.574216
CAL0001367	5588	orf19.6367	0.171994	0.114041	0.171994
CAL0004401	2675	orf19.4726	0.292363	0.193859	0.292363
CAL0004239	3980	orf19.2755	0.308321	0.20467	0.308321
CAL0006297	3402	orf19.2258	0.494481	0.328483	0.494481
CAL0000448	5934	orf19.3672	1.1213	0.746625	1.1213
CAF0007071	1460	orf19.6630	-0.519012	0.345846	0.519012
CAL0002709	5064	orf19.1988	0.422789	0.282838	0.422789
CAL0001966	1875	orf19.1136	-0.658879	0.440992	0.658879
CAL0004369	3814	orf19.4713	0.751489	0.503186	0.751489
CAL0004909	379	orf19.4076	1.18183	0.79238	1.18183
CAL0002627	5726	orf19.5165	-0.695114	0.466068	0.695114
CAL0004465	3267	orf19.2063	-0.843523	0.565695	0.843523
CAL0006304	128	orf19.1601	-0.133556	0.089591	0.133556
CAL0003794	100	orf19.1335	0.307434	0.206279	0.307434
CAL0002586	409	orf19.1945	0.770813	0.517523	0.770813
CAL0003940	5246	orf19.1382	-1.34332	0.902796	1.34332
CAL0005995	4848	orf19.2927	-0.536383	0.360585	0.536383
CAL0002228	1696	orf19.6453	-0.453125	0.30462	0.453125
CAL0002255	2170	orf19.6464	-0.627968	0.422513	0.627968
CAF0007003	2583	orf19.4191.1	-1.06045	0.713755	1.06045
CAL0002417	225	orf19.3182	-0.18895	0.127268	0.18895
CAL0000808	3762	orf19.2382	-0.307374	0.207039	0.307374
CAL0001356	5724	orf19.6360	0.504742	0.340502	0.504742
CAL0001045	3934	orf19.4357	-0.28687	0.193711	0.28687
CAL0002680	3616	orf19.825	-0.260217	0.176014	0.260217
CAL0002929	4178	orf19.894	-0.68813	0.46547	0.68813
CAL0002708	1922	orf19.1986	0.14747	0.09976	0.14747
CAL0001728	6201	orf19.1861	-0.524056	0.354541	0.524056
CAL0004553	6194	orf19.1433	0.455682	0.308371	0.455682
CAL0001054	5797	orf19.663	0.302977	0.205177	0.302977
CAL0003543	141	orf19.5238	-0.258381	0.175122	0.258381
CAL0004035	404	orf19.264	-0.439502	0.297974	0.439502
CAL0000508	3435	orf19.17	-0.639512	0.433673	0.639512
CAL0001654	232	orf19.1834	-0.525521	0.356727	0.525521
CAL0002736	1675	orf19.5198	-0.337879	0.229485	0.337879
CAL0004088	4390	orf19.3321	-0.770276	0.523644	0.770276
CAL0003494	1702	orf19.2665	-0.594986	0.404576	0.594986
CAL0005851	268	orf19.3527	0.233987	0.15922	0.233987
CAL0002928	2537	orf19.3931	-0.587315	0.399854	0.587315
CAL0120932	6191	orf19.6852.1	0.612085	0.416779	0.612085
CAL0003646	5414	orf19.4627	-0.25427	0.173167	0.25427
CAL0003650	3580	orf19.4629	-0.569381	0.387972	0.569381
CAL0003640	678	orf19.4624	-0.263977	0.179878	0.263977
CAL0005140	6104	orf19.2847	-0.237433	0.161794	0.237433
CAL0005894	2648	orf19.4197	-0.253344	0.172725	0.253344
CAL0001102	3168	orf19.677	-0.325096	0.221787	0.325096
CAL0000168	2710	orf19.537	0.554695	0.378525	0.554695
CAL0001331	5229	orf19.3006	0.203518	0.138929	0.203518
CAL0001796	1739	orf19.1887	-0.743466	0.507765	0.743466
CAL0002028	6092	orf19.4490	0.169913	0.116116	0.169913
CAL0001690	5412	orf19.5059	0.312269	0.213467	0.312269
CAL0001498	5041	orf19.2425	-1.07608	0.735949	1.07608
CAL0006225	4138	orf19.4911	-0.61264	0.419534	0.61264
CAL0002029	5434	orf19.797	-0.191138	0.131013	0.191138
CAL0002555	451	orf19.5138	-1.40749	0.96541	1.40749
CAL0006048	4572	orf19.6156	0.460628	0.316212	0.460628
CAL0002978	5175	orf19.3942	-0.372605	0.255828	0.372605
CAL0005793	1603	orf19.473	0.523831	0.36001	0.523831
CAL0003404	3284	orf19.2622	0.246009	0.16912	0.246009
CAL0005510	4330	orf19.1547	-0.669162	0.460331	0.669162
CAL0000637	602	orf19.5642	-0.35424	0.244409	0.35424
CAL0002860	5440	orf19.4570	-1.30043	0.897742	1.30043
CAL0002234	1020	orf19.6456	0.998762	0.690247	0.998762
CAL0002207	1199	orf19.3899	0.570055	0.393979	0.570055
CAL0001242	1202	orf19.3762	-0.489858	0.338782	0.489858
CAL0005361	2517	orf19.2150	0.120551	0.083402	0.120551
CAL0005084	5557	orf19.3481	0.303669	0.21076	0.303669
CAL0001553	5005	orf19.2451	-0.162881	0.113122	0.162881
CAL0005083	2006	orf19.2825	0.320062	0.223082	0.320062
CAL0006683	4313	orf19.6403.1	-0.32136	0.224175	0.32136
CAL0005385	2076	orf19.1505	-0.974422	0.680463	0.974422
CAL0001252	528	orf19.1084	-0.159886	0.111761	0.159886
CAL0001187	2706	orf19.1053	-1.28274	0.897538	1.28274
CAL0004707	3820	orf19.6705	-0.474437	0.332246	0.474437
CAL0005918	1524	orf19.3550	0.377679	0.264546	0.377679
CAL0004640	2745	orf19.4002	0.587134	0.411395	0.587134
CAL0001149	3258	orf19.3728	0.415718	0.291416	0.415718
CAL0002963	5967	orf19.102	-0.215523	0.151092	0.215523
CAL0004155	2608	orf19.3353	-0.401391	0.281578	0.401391
CAL0006187	4353	orf19.2214	0.31097	0.218192	0.31097
CAL0002428	5328	orf19.5870	0.367671	0.258022	0.367671
CAL0000075	1093	orf19.1669	-0.272325	0.191147	0.272325
CAL0001388	2334	orf19.3034	0.517364	0.363397	0.517364
CAL0002397	5262	orf19.3175	-0.185578	0.130574	0.185578
CAL0001450	5068	orf19.2404	-0.202064	0.142288	0.202064
CAL0000809	227	orf19.2383	0.494379	0.348446	0.494379
CAL0000312	744	orf19.4271	0.221128	0.155881	0.221128
CAL0000958	1454	orf19.4326	0.316638	0.223259	0.316638
CAL0005806	2373	orf19.6858	0.516088	0.364091	0.516088
CAL0004367	5222	orf19.4711	-0.522915	0.369058	0.522915
CAL0000897	5051	orf19.1761	0.232932	0.16457	0.232932
CAL0004132	5373	orf19.3340	0.363765	0.257068	0.363765
CAL0001517	389	orf19.5776	-0.238101	0.16856	0.238101
CAL0001503	5197	orf19.3084	0.637021	0.451219	0.637021
CAL0003190	4040	orf19.3203	0.464703	0.329389	0.464703
CAL0001338	2667	orf19.3010	0.550681	0.391114	0.550681
CAL0004198	4524	orf19.2723	0.545612	0.387812	0.545612
CAL0005683	5196	orf19.1596	1.4104	1.0027	1.4104
CAL0000113	2295	orf19.520	-0.477874	0.339841	0.477874
CAL0001121	5382	orf19.4378	-0.820312	0.583459	0.820312
CAL0006001	948	orf19.3586	-0.43376	0.308724	0.43376
CAL0003376	1734	orf19.2611	0.371557	0.264511	0.371557
CAL0000201	5961	orf19.6923	1.16333	0.828301	1.16333
CAL0000816	4352	orf19.2387	-0.335503	0.238913	0.335503
CAL0001956	2475	orf19.4474	-0.602541	0.42961	0.602541
CAL0000301	2216	orf19.3611	-0.793315	0.56597	0.793315
CAL0005864	1013	orf19.492	0.156758	0.112065	0.156758
CAL0006137	1193	orf19.5531	-0.171783	0.123106	0.171783
CAL0003169	4792	orf19.3990	0.500544	0.358789	0.500544
CAL0006292	4067	orf19.5597	-0.189031	0.135521	0.189031
CAL0004974	4219	orf19.3439	1.69673	1.21742	1.69673
CAL0003385	890	orf19.2616	-0.919484	0.659747	0.919484
CAL0003821	4703	orf19.1341	0.862389	0.618899	0.862389
CAL0005470	3594	orf19.2190	0.754753	0.542363	0.754753
CAL0001919	3384	orf19.4467	-0.46853	0.336815	0.46853
CAL0004717	2042	orf19.329	-0.906499	0.651968	0.906499
CAL0001366	4754	orf19.3023	-1.02157	0.735015	1.02157
CAL0005082	4663	orf19.3480	0.195602	0.140829	0.195602
CAL0002456	2589	orf19.2540	0.448446	0.322946	0.448446
CAL0000043	4166	orf19.1658	-0.518909	0.373763	0.518909
CAL0000270	1992	orf19.564	-0.73309	0.528382	0.73309
CAL0001380	5947	orf19.3030	-1.1328	0.817514	1.1328
CAL0000472	4514	orf19.3689	-0.424128	0.306234	0.424128
CAL0005521	2215	orf19.4893	0.589652	0.425792	0.589652
CAL0001323	5324	orf19.6345	0.274896	0.198567	0.274896
CAL0001228	1070	orf19.1077	-1.40104	1.0132	1.40104
CAL0006042	5240	orf19.2949	-0.488574	0.353458	0.488574
CAL0003027	3157	orf19.121	0.352372	0.255121	0.352372
CAL0005073	1043	orf19.6026	-0.291171	0.210986	0.291171
CAL0004890	5957	orf19.3411	0.735232	0.533101	0.735232
CAL0001950	3943	orf19.778	-0.259092	0.188306	0.259092
CAL0004928	5023	orf19.3425	0.44751	0.325696	0.44751
CAL0003007	4678	orf19.3950	0.776129	0.565274	0.776129
CAL0005631	2360	orf19.4123	0.243375	0.177515	0.243375
CAL0000150	229	orf19.1684	-0.758937	0.553579	0.758937
CAL0001163	4149	orf19.3730	0.364502	0.265944	0.364502
CAL0006288	2673	orf19.4939	0.403104	0.294243	0.403104
CAL0003487	3232	orf19.5207	1.14783	0.839192	1.14783
CAL0004293	715	orf19.2789	0.790256	0.578611	0.790256
CAL0002767	4472	orf19.4548	-0.399925	0.293262	0.399925
CAL0004100	3353	orf19.3328	-0.848504	0.622226	0.848504
CAL0001251	5711	orf19.1083	-0.353093	0.258934	0.353093
CAL0002123	1184	orf19.3867	-0.317727	0.233028	0.317727
CAL0004143	1712	orf19.3347	0.422898	0.310512	0.422898
CAL0001314	4584	orf19.3798	-0.199502	0.146776	0.199502
CAL0004415	2601	orf19.5389	-0.758782	0.558881	0.758782
CAL0005273	4265	orf19.2110	0.785631	0.578809	0.785631
CAL0001602	4232	orf19.2471	0.415895	0.306703	0.415895
CAL0005890	3252	orf19.4194	0.388673	0.286633	0.388673
CAL0005556	4693	orf19.4105	-0.931887	0.687388	0.931887
CAL0000212	3734	orf19.6928	-0.241571	0.178635	0.241571
CAL0005692	2967	orf19.443	0.745212	0.551508	0.745212
CAL0002588	5535	orf19.1948	0.344155	0.254763	0.344155
CAL0002211	4280	orf19.3100	0.312519	0.231346	0.312519
CAL0005973	4820	orf19.2917	-0.193414	0.143192	0.193414
CAL0005064	3360	orf19.3477	-0.2672	0.197839	0.2672
CAL0004518	1629	orf19.1422	0.531446	0.394058	0.531446
CAL0005241	1818	orf19.2890	-0.603074	0.448044	0.603074
CAL0002150	4629	orf19.3872	-0.236148	0.175445	0.236148
CAL0005856	2948	orf19.4185	0.523184	0.388811	0.523184
CAL0005320	3563	orf19.4818	-0.70446	0.524086	0.70446
CAL0006120	344	orf19.5527	-0.467398	0.34775	0.467398
CAL0002463	2603	orf19.2544	-0.654292	0.486883	0.654292
CAL0005535	5643	orf19.400	0.258877	0.193097	0.258877
CAL0001002	3733	orf19.1799	0.197221	0.147178	0.197221
CAL0001263	5138	orf19.6316	1.59236	1.18914	1.59236
CAL0004351	3979	orf19.2020	0.586316	0.437979	0.586316
CAL0005328	3571	orf19.2137	-1.21251	0.905791	1.21251
CAL0002152	5578	orf19.3874	0.330728	0.247078	0.330728
CAL0002553	5652	orf19.5136	0.481182	0.359724	0.481182
CAL0001838	4323	orf19.747	-0.549636	0.41125	0.549636
CAL0002512	5591	orf19.5118	-0.311813	0.233457	0.311813
CAL0001468	5585	orf19.2410	-0.288987	0.216603	0.288987
CAL0001313	1959	orf19.3797	0.212513	0.159289	0.212513
CAL0000074	2872	orf19.1668	0.609017	0.456641	0.609017
CAL0004160	3738	orf19.3356	-0.338948	0.254308	0.338948
CAL0006083	2541	orf19.2967	0.46689	0.350458	0.46689
CAL0004873	3666	orf19.4062	0.526732	0.395922	0.526732
CAL0003704	1088	orf19.1304	-0.332511	0.250066	0.332511
CAL0005441	5734	orf19.1525	0.32465	0.244276	0.32465
CAL0003266	2955	orf19.190	-0.76704	0.577347	0.76704
CAL0004456	5194	orf19.2060	-0.594944	0.448181	0.594944
CAL0006238	2708	orf19.5575	-0.331198	0.249607	0.331198
CAL0005141	3876	orf19.2848	-0.690837	0.521063	0.690837
CAL0006177	1289	orf19.5551	0.331338	0.250041	0.331338
CAL0004347	3327	orf19.4705	0.351119	0.265219	0.351119
CAL0004972	3289	orf19.3438	0.510018	0.385897	0.510018
CAL0003908	636	orf19.1372	-0.961109	0.728375	0.961109
CAL0001527	4321	orf19.2437	0.262213	0.198868	0.262213
CAL0003527	1567	orf19.5229	0.165018	0.125185	0.165018
CAL0000747	2403	orf19.2350	-0.73809	0.560128	0.73809
CAL0005098	736	orf19.6031	0.39719	0.301578	0.39719
CAL0002422	3484	orf19.3185	-0.161182	0.122444	0.161182
CAL0120930	3963	orf19.685.1	-0.652595	0.495877	0.652595
CAL0004039	1894	orf19.3301	-0.999693	0.759879	0.999693
CAL0005648	2186	orf19.430	0.991819	0.754042	0.991819
CAL0000750	1950	orf19.2352	0.360732	0.274398	0.360732
CAL0004877	2022	orf19.3409	-0.16414	0.124874	0.16414
CAL0004780	4486	orf19.1495	-0.272906	0.207678	0.272906
CAL0006383	4771	orf19.2288	-0.148878	0.113296	0.148878
CAL0005198	5564	orf19.2871	0.343614	0.261537	0.343614
CAL0004649	421	orf19.4007	0.604012	0.460185	0.604012
CAL0003025	3602	orf19.120	0.883825	0.673669	0.883825
CAL0003020	2075	orf19.1275	-1.62284	1.23701	1.62284
CAL0006219	4961	orf19.5569	-0.170479	0.130076	0.170479
CAL0001933	2018	orf19.771	0.337809	0.257793	0.337809
CAL0006047	3598	orf19.6155	-0.269334	0.205561	0.269334
CAL0005564	859	orf19.1564	-0.332395	0.253702	0.332395
CAL0004967	743	orf19.399	0.487986	0.37251	0.487986
CAL0003493	1074	orf19.2664	-0.452985	0.346004	0.452985
CAL0004372	1628	orf19.4715	0.190983	0.145887	0.190983
CAL0001808	3586	orf19.738	0.182314	0.139291	0.182314
CAL0005785	1122	orf19.4166	-0.705697	0.539513	0.705697
CAL0005060	1914	orf19.3474	0.569872	0.436393	0.569872
CAL0000962	4518	orf19.1782	0.362993	0.27839	0.362993
CAL0002184	4496	orf19.3888	0.170144	0.130505	0.170144
CAL0004502	3984	orf19.2079	0.372379	0.285975	0.372379
CAL0003796	548	orf19.1336	-0.187377	0.143908	0.187377
CAL0002654	3551	orf19.5171	0.431131	0.331279	0.431131
CAL0005654	6055	orf19.433	-0.694777	0.534056	0.694777
CAL0001015	3930	orf19.1002	0.964552	0.74152	0.964552
CAL0002789	2760	orf19.4555	1.2767	0.982008	1.2767
CAL0004883	1217	orf19.371	-0.2816	0.216729	0.2816
CAL0003670	4539	orf19.4634	0.427829	0.330116	0.427829
CAL0005285	2282	orf19.2119	0.286269	0.220888	0.286269
CAL0002157	1508	orf19.1191	0.373396	0.289084	0.373396
CAL0002781	1901	orf19.4550	-0.354474	0.274756	0.354474
CAL0000021	5616	orf19.1648	0.330452	0.256306	0.330452
CAL0004862	663	orf19.366	0.502802	0.390115	0.502802
CAL0001372	2031	orf19.5710	0.168976	0.13131	0.168976
CAL0001581	778	orf19.2462	-0.748645	0.58184	0.748645
CAL0002030	861	orf19.4491	0.221396	0.172182	0.221396
CAL0000084	5156	orf19.516	-1.16193	0.903699	1.16193
CAL0004623	2088	orf19.300	0.490827	0.382118	0.490827
CAL0000068	1480	orf19.1662	0.252016	0.19623	0.252016
CAL0001250	1195	orf19.1082	-0.537844	0.419366	0.537844
CAL0001564	1083	orf19.2459	1.38088	1.07675	1.38088
CAL0000955	5770	orf19.4324	0.406159	0.316807	0.406159
CAL0003979	2746	orf19.243	-0.372283	0.290394	0.372283
CAL0000844	4503	orf19.2399	0.311827	0.243486	0.311827
CAL0006343	1837	orf19.2274	-1.16616	0.911003	1.16616
CAL0001280	375	orf19.1093	-0.270972	0.211917	0.270972
CAL0004342	2943	orf19.4701	0.392588	0.307226	0.392588
CAL0002287	1410	orf19.6476	0.538498	0.421695	0.538498
CAL0003016	4824	orf19.3959	-0.241249	0.188968	0.241249
CAL0002911	3902	orf19.3928	0.534055	0.418736	0.534055
CAL0003941	6107	orf19.1383	-0.446217	0.349948	0.446217
CAL0004869	390	orf19.3405	-1.42488	1.11792	1.42488
CAL0004337	2404	orf19.2016	-0.610833	0.479363	0.610833
CAL0004036	5572	orf19.3300	0.380518	0.298619	0.380518
CAL0003061	5333	orf19.1283	0.467003	0.366601	0.467003
CAL0001872	4204	orf19.1110	0.500699	0.393297	0.500699
CAL0003811	2845	orf19.984	1.41322	1.11166	1.41322
CAL0006015	310	orf19.2934	0.250616	0.197368	0.250616
CAL0001917	4084	orf19.4466	0.867936	0.683533	0.867936
CAL0003663	4844	orf19.4630	1.02305	0.80579	1.02305
CAL0005719	4873	orf19.4147	-0.183466	0.144584	0.183466
CAL0005473	3325	orf19.2191	0.766163	0.603911	0.766163
CAF0006902	1878	orf19.596.1	-0.170579	0.134541	0.170579
CAL0001405	4092	orf19.3041	-0.584266	0.461136	0.584266
CAL0003728	1329	orf19.1314	0.283463	0.224087	0.283463
CAL0000700	4573	orf19.2326	0.411789	0.325629	0.411789
CAL0001212	4563	orf19.1069	-0.36671	0.290072	0.36671
CAL0005969	3377	orf19.2915	0.489379	0.387143	0.489379
CAL0001052	3697	orf19.660	-0.987979	0.782486	0.987979
CAL0006018	3134	orf19.3591	0.175346	0.138885	0.175346
CAL0004920	1401	orf19.385	0.120782	0.095826	0.120782
CAL0003011	168	orf19.3954	-0.448739	0.356061	0.448739
CAL0001884	614	orf19.1119	-0.148596	0.118386	0.148596
CAL0006245	6157	orf19.5579	-0.688607	0.548977	0.688607
CAL0002248	2701	orf19.5804	0.68265	0.544264	0.68265
CAL0006408	2581	orf19.1636	0.480839	0.383383	0.480839
CAL0006384	5449	orf19.2289	0.210683	0.168178	0.210683
CAL0004571	1935	orf19.2099	-0.894292	0.713994	0.894292
CAL0002274	145	orf19.6470	0.208066	0.166212	0.208066
CAL0004060	794	orf19.6653	0.383899	0.306905	0.383899
CAL0003522	2899	orf19.5224	0.199034	0.15918	0.199034
CAL0005413	3149	orf19.2173	0.410847	0.329048	0.410847
CAL0006027	4528	orf19.6140	-0.658134	0.527146	0.658134
CAL0005338	4876	orf19.5483	0.417294	0.33425	0.417294
CAL0000767	460	orf19.1708	1.12729	0.903705	1.12729
CAL0003512	955	orf19.2673	-0.363064	0.291099	0.363064
CAL0000480	2921	orf19.6237	-0.282364	0.226519	0.282364
CAL0002539	1596	orf19.2582	0.20896	0.167741	0.20896
CAL0000512	2237	orf19.6252	-0.22952	0.184367	0.22952
CAL0003542	5644	orf19.5237	0.677168	0.544024	0.677168
CAL0002855	877	orf19.3911	-0.155672	0.12508	0.155672
CAL0001806	3467	orf19.4430	0.506939	0.40732	0.506939
CAL0005525	2695	orf19.1552	-0.139526	0.112198	0.139526
CAL0001203	2312	orf19.1061	-0.868737	0.698634	0.868737
CAL0000570	3056	orf19.5619	-0.419044	0.337013	0.419044
CAL0000317	5282	orf19.579	0.239143	0.192347	0.239143
CAL0002751	2357	orf19.844	0.343292	0.277456	0.343292
CAL0006346	1002	orf19.1619	0.329778	0.267209	0.329778
CAL0002483	2346	orf19.2558	0.427227	0.346326	0.427227
CAL0000580	3967	orf19.48	-0.260147	0.211238	0.260147
CAL0004081	3900	orf19.281	1.00869	0.81968	1.00869
CAL0000424	1203	orf19.3658	0.727048	0.590817	0.727048
CAF0007416	5014	orf19.789.1	0.469873	0.381838	0.469873
CAL0006143	1222	orf19.5535	0.814344	0.662226	0.814344
CAL0004225	6202	orf19.3396	-0.373914	0.304306	0.373914
CAL0000870	5261	orf19.1754	-0.422675	0.344033	0.422675
CAL0000350	6142	orf19.4282	-0.228587	0.186073	0.228587
CAL0003556	1587	orf19.5243	-0.20107	0.163919	0.20107
CAL0001663	2637	orf19.2498	0.221543	0.18061	0.221543
CAL0002647	384	orf19.816	1.02715	0.839625	1.02715
CAL0001691	327	orf19.1852	-0.882348	0.721521	0.882348
CAL0002149	5878	orf19.3871	-0.331436	0.271601	0.331436
CAL0000328	5881	orf19.581	0.293932	0.240928	0.293932
CAL0004212	3746	orf19.2733	-0.309525	0.253726	0.309525
CAL0003431	3635	orf19.2633	-1.45571	1.19331	1.45571
CAL0003759	2994	orf19.1325	-0.878893	0.720967	0.878893
CAL0001669	953	orf19.5045	-1.18361	0.971595	1.18361
CAL0003436	110	orf19.3291	0.388402	0.319146	0.388402
CAL0002260	725	orf19.3122	0.754756	0.620481	0.754756
CAL0006326	5694	orf19.4950	-0.871486	0.716928	0.871486
CAL0004229	892	orf19.2743	-0.831752	0.684356	0.831752
CAL0002159	5362	orf19.1192	0.428799	0.352894	0.428799
CAL0000269	2354	orf19.3600	-1.28802	1.06039	1.28802
CAL0003790	5423	orf19.1333	0.351496	0.289478	0.351496
CAL0000511	462	orf19.6250	-0.228191	0.188067	0.228191
CAL0002534	1288	orf19.5129	1.25884	1.03827	1.25884
CAL0000192	1330	orf19.1698	-0.421926	0.348044	0.421926
CAL0003525	5606	orf19.5227	-0.368604	0.30411	0.368604
CAL0004924	1314	orf19.3423	-0.099371	0.08206	0.099371
CAL0000476	4877	orf19.6233	-0.196687	0.162461	0.196687
CAL0005349	1284	orf19.2146	0.647719	0.535372	0.647719
CAL0004102	1638	orf19.290	-0.300101	0.248128	0.300101
CAL0003729	3655	orf19.4657	0.440176	0.364118	0.440176
CAL0003595	3686	orf19.4609	-0.228479	0.189183	0.228479
CAL0001853	5628	orf19.4448	-0.444494	0.368187	0.444494
CAL0003949	2980	orf19.231	-0.175925	0.145888	0.175925
CAL0001908	2884	orf19.3806	0.496088	0.411495	0.496088
CAL0004932	5704	orf19.3426	-0.251249	0.208474	0.251249
CAL0002944	1597	orf19.1250	0.292878	0.243284	0.292878
CAF0006932	3323	orf19.2006.1	0.388198	0.322568	0.388198
CAL0001603	1320	orf19.1815	0.222249	0.184857	0.222249
CAL0002727	1028	orf19.4536	-0.198382	0.165083	0.198382
CAL0000642	3910	orf19.2302	0.933915	0.777256	0.933915
CAL0006254	1118	orf19.5580	-0.361665	0.301176	0.361665
CAL0005291	1761	orf19.4805	0.432982	0.361206	0.432982
CAL0001684	2502	orf19.5053	0.540608	0.451015	0.540608
CAL0005248	4376	orf19.2893	0.991787	0.828547	0.991787
CAL0001871	382	orf19.759	0.136698	0.114351	0.136698
CAL0003531	1703	orf19.2684	-0.17894	0.149712	0.17894
CAL0005636	3203	orf19.4128	0.988571	0.827277	0.988571
CAL0006146	5256	orf19.6193	-0.513895	0.430234	0.513895
CAL0001682	868	orf19.5051	-1.32777	1.11173	1.32777
CAL0005643	3555	orf19.1585	-0.425268	0.356571	0.425268
CAL0001267	5624	orf19.3770	-0.69211	0.581018	0.69211
CAL0002508	1162	orf19.5112	0.144148	0.121048	0.144148
CAL0000496	2286	orf19.6244	0.265345	0.222824	0.265345
CAL0004778	1671	orf19.1493	-0.329315	0.276718	0.329315
CAL0004735	5958	orf19.1483	0.348899	0.293266	0.348899
CAL0006175	5561	orf19.2209	-0.22568	0.189914	0.22568
CAL0006241	3636	orf19.5576	-0.248569	0.209338	0.248569
CAL0000558	2253	orf19.5612	-0.268454	0.226091	0.268454
CAL0001524	4658	orf19.5779	0.366292	0.308601	0.366292
CAL0000766	964	orf19.2364	-0.163773	0.138111	0.163773
CAL0001841	3915	orf19.4442	0.909741	0.769368	0.909741
CAL0006031	4171	orf19.6146	0.876797	0.741523	0.876797
CAL0000318	4521	orf19.4273	0.363994	0.30786	0.363994
CAL0003897	6195	orf19.216	-0.367691	0.311405	0.367691
CAL0000778	1484	orf19.2370	0.444623	0.376967	0.444623
CAL0001876	891	orf19.4456	-0.247371	0.21015	0.247371
CAL0001496	5121	orf19.3080	0.425299	0.361736	0.425299
CAL0000356	2717	orf19.3628	0.201535	0.171794	0.201535
CAL0001326	5818	orf19.3003	0.22241	0.18959	0.22241
CAL0005587	5131	orf19.4112	0.251931	0.214764	0.251931
CAL0004867	1623	orf19.4060	-0.145923	0.1244	0.145923
CAL0004175	2979	orf19.3365	-0.399235	0.340741	0.399235
CAL0004228	1411	orf19.2742	-0.320005	0.273348	0.320005
CAL0004005	2800	orf19.6632	0.33623	0.287426	0.33623
CAL0000049	177	orf19.506	-0.503404	0.430347	0.503404
CAL0002812	5855	orf19.863	-0.216016	0.184782	0.216016
CAL0000933	3926	orf19.1776	-0.451391	0.386359	0.451391
CAL0005512	2957	orf19.1549	0.225236	0.19289	0.225236
	3359	orf19.2707.1	-0.872093	0.74743	0.872093
CAL0003049	684	orf19.3960	-0.70409	0.603447	0.70409
CAL0003223	4442	orf19.178	-0.48728	0.417729	0.48728
CAL0003250	1952	orf19.3222	0.359005	0.308224	0.359005
CAL0002294	4957	orf19.3136	0.474638	0.407991	0.474638
CAL0002128	2161	orf19.1182	-0.346532	0.298639	0.346532
CAL0002068	900	orf19.3848	0.579444	0.4996	0.579444
CAL0000815	187	orf19.2386	0.553067	0.477013	0.553067
CAL0000683	2317	orf19.86	-0.259352	0.22376	0.259352
CAL0003198	485	orf19.3206	-0.305439	0.264104	0.305439
CAL0000546	3818	orf19.30	0.353265	0.30565	0.353265
CAL0000248	4692	orf19.6938	-0.278906	0.241852	0.278906
CAL0001492	6137	orf19.5765	-0.144569	0.125391	0.144569
CAL0001683	729	orf19.5052	-0.478949	0.415437	0.478949
CAL0000920	4185	orf19.4312	0.412642	0.358317	0.412642
CAL0003279	3856	orf19.3231	0.923669	0.802129	0.923669
CAL0001862	4011	orf19.752	-0.252009	0.219081	0.252009
CAL0000989	4267	orf19.4336	0.200707	0.17469	0.200707
CAL0001134	484	orf19.684	-0.480796	0.41849	0.480796
CAL0001188	721	orf19.1054	0.199134	0.173433	0.199134
CAL0003975	4667	orf19.240	0.305929	0.26694	0.305929
CAL0002250	2067	orf19.5805	-0.408648	0.356572	0.408648
CAL0002007	3214	orf19.4488	-0.170255	0.148608	0.170255
CAL0004290	280	orf19.2786	-0.284858	0.248919	0.284858
CAL0002893	5137	orf19.882	-0.215361	0.188195	0.215361
CAL0002487	6058	orf19.5102	0.755173	0.66006	0.755173
CAL0000151	4929	orf19.1685	-0.62358	0.545066	0.62358
CAL0002632	3204	orf19.1960	-0.295916	0.258667	0.295916
CAL0002815	3145	orf19.864	-0.236355	0.206607	0.236355
CAL0000678	335	orf19.81	-0.332358	0.290685	0.332358
CAL0006273	6199	orf19.2249	0.357065	0.312414	0.357065
CAL0001546	5802	orf19.5789	0.176617	0.154788	0.176617
CAL0001788	3975	orf19.5085	-0.136758	0.119875	0.136758
CAF0006911	2285	orf19.836.1	0.252544	0.221405	0.252544
CAL0005531	9	orf19.4899	-1.43664	1.26002	1.43664
CAL0004923	5075	orf19.386	-0.208052	0.182715	0.208052
CAL0003791	4193	orf19.4676	0.432241	0.379934	0.432241
CAL0006402	4532	orf19.2290	-0.343093	0.301609	0.343093
CAL0003825	4579	orf19.4686	0.405762	0.356862	0.405762
CAL0000583	571	orf19.5622	0.37551	0.330589	0.37551
CAL0003489	2332	orf19.5209	0.436874	0.384647	0.436874
CAF0007443	5368	orf19.263.1	0.236436	0.208188	0.236436
CAL0003557	4039	orf19.5244	-0.357215	0.314553	0.357215
CAL0000389	5392	orf19.4297	-0.331928	0.292482	0.331928
CAL0006072	4970	orf19.6166	-0.562946	0.496133	0.562946
CAL0002073	973	orf19.1166	-0.156807	0.138205	0.156807
CAL0004523	958	orf19.2081	0.246567	0.217319	0.246567
CAL0003619	4298	orf19.4618	0.086235	0.076012	0.086235
CAL0001194	1846	orf19.1059	0.435389	0.383788	0.435389
CAL0005480	1226	orf19.1538	-0.313854	0.277538	0.313854
CAL0002952	356	orf19.1253	0.246395	0.218002	0.246395
CAL0005432	2315	orf19.4863	0.35134	0.311414	0.35134
CAL0003352	4002	orf19.2602	0.270591	0.239899	0.270591
CAL0003505	3303	orf19.5216	0.406206	0.360153	0.406206
CAL0001758	5815	orf19.4418	0.358725	0.318206	0.358725
CAL0001768	471	orf19.1876	-0.370837	0.329222	0.370837
CAL0004963	4097	orf19.398	-0.680269	0.604234	0.680269
CAL0003792	5638	orf19.1334	-0.408029	0.362513	0.408029
CAL0001264	5629	orf19.6317	-0.095778	0.085109	0.095778
CAL0005928	1155	orf19.3555	0.363154	0.322915	0.363154
CAL0005043	4314	orf19.6011	-0.324287	0.288525	0.324287
CAL0003380	5810	orf19.2614	-0.631827	0.562207	0.631827
CAL0004316	4559	orf19.2002	-0.151311	0.134706	0.151311
CAF0006977	2569	orf19.3181.1	0.454909	0.405887	0.454909
CAL0002491	546	orf19.5106	0.242201	0.216373	0.242201
CAL0001241	2175	orf19.3761	-0.193033	0.172788	0.193033
CAL0000727	5204	orf19.2337	0.387145	0.346959	0.387145
CAL0000446	3786	orf19.3670	-1.48646	1.33409	1.48646
CAL0004204	6037	orf19.2728	0.583172	0.523529	0.583172
CAL0001754	1229	orf19.4415	0.272059	0.244457	0.272059
CAL0004031	4869	orf19.262	0.214722	0.193085	0.214722
CAL0006182	6031	orf19.5555	0.290519	0.261486	0.290519
CAL0000220	4920	orf19.4243	-0.524928	0.472799	0.524928
CAL0003244	2508	orf19.3220	0.919001	0.828698	0.919001
CAL0000936	4948	orf19.1779	-0.101958	0.091961	0.101958
CAL0000982	4481	orf19.638	-0.393462	0.35532	0.393462
CAL0002600	4255	orf19.1954	0.148624	0.134255	0.148624
CAF0007430	2944	orf19.3940.1	0.39881	0.360272	0.39881
CAL0006149	3642	orf19.6195	-0.321489	0.290503	0.321489
CAL0002179	3951	orf19.3881	-0.476034	0.43043	0.476034
CAL0001963	5762	orf19.4478	0.273627	0.247477	0.273627
CAL0000148	1622	orf19.1682	0.150496	0.136164	0.150496
CAL0005854	2112	orf19.4184	0.213879	0.193613	0.213879
CAL0002247	5672	orf19.6460	0.378577	0.342865	0.378577
CAL0005299	3055	orf19.4809	-0.183519	0.166397	0.183519
CAL0001090	1906	orf19.671	-0.334753	0.303599	0.334753
CAL0001740	1816	orf19.713	0.263521	0.2401	0.263521
CAL0003109	1501	orf19.1299	0.153752	0.140088	0.153752
	1755	orf19.4684.2	0.374859	0.341705	0.374859
CAL0004422	4403	orf19.4732	0.13277	0.121245	0.13277
CAL0005775	355	orf19.4161	-0.304814	0.278451	0.304814
CAL0002979	1072	orf19.3944	-0.214715	0.196243	0.214715
CAL0004167	2576	orf19.3360	-0.415587	0.380036	0.415587
CAL0005401	5717	orf19.1510	0.5598	0.512358	0.5598
CAL0002715	873	orf19.835	-0.184451	0.168821	0.184451
CAL0006006	283	orf19.6133	0.237603	0.217702	0.237603
CAL0001687	2298	orf19.5057	-0.329077	0.301602	0.329077
CAL0002823	153	orf19.868	0.519286	0.476071	0.519286
CAL0001560	1179	orf19.5799	0.299772	0.275058	0.299772
CAL0006294	2634	orf19.5599	-0.178599	0.164036	0.178599
CAL0000368	4958	orf19.593	0.238834	0.219523	0.238834
CAL0001141	5760	orf19.688	-0.373301	0.343387	0.373301
CAL0000390	3606	orf19.4299	-0.3486	0.320811	0.3486
CAL0002504	285	orf19.2564	-0.318402	0.293634	0.318402
CAL0001433	1928	orf19.3054	-0.197495	0.182265	0.197495
CAL0002793	2274	orf19.1214	0.197229	0.182022	0.197229
CAL0000230	5195	orf19.551	0.210852	0.194698	0.210852
CAL0005078	5699	orf19.2821	0.69781	0.644394	0.69781
CAL0006165	1048	orf19.5544	-0.220854	0.204085	0.220854
CAL0002045	1794	orf19.4497	-0.382299	0.353307	0.382299
CAL0005656	4962	orf19.434	-0.274163	0.253804	0.274163
CAL0002493	6115	orf19.1900	-0.896798	0.830233	0.896798
CAL0001006	422	orf19.643	-0.638358	0.591101	0.638358
CAL0002380	3405	orf19.5855	0.285219	0.264191	0.285219
CAL0005368	6071	orf19.2154	-0.402065	0.372527	0.402065
CAL0001068	3103	orf19.3706	0.196279	0.181861	0.196279
CAL0001034	2248	orf19.657	0.233772	0.216823	0.233772
CAL0004957	1467	orf19.3433	0.697603	0.647657	0.697603
CAF0006924	928	orf19.1336.2	-0.205684	0.191059	0.205684
CAL0004970	125	orf19.3437	0.738011	0.685598	0.738011
CAL0000294	4589	orf19.4269	-0.359716	0.334199	0.359716
CAL0001455	826	orf19.2406	-0.30945	0.287628	0.30945
CAL0002634	2193	orf19.1961	0.174727	0.162472	0.174727
CAL0001935	2639	orf19.772	0.203607	0.189377	0.203607
CAL0000445	24	orf19.6219	0.62551	0.582231	0.62551
CAL0000376	1607	orf19.597	-0.334649	0.311548	0.334649
CAL0000078	1692	orf19.512	-0.180932	0.168726	0.180932
CAL0000638	5454	orf19.5643	-0.772052	0.720106	0.772052
CAL0004052	3445	orf19.3308	-1.21276	1.1337	1.21276
CAL0000246	933	orf19.557	0.372898	0.348715	0.372898
CAL0001904	1167	orf19.3804	0.308777	0.289514	0.308777
CAL0002343	1389	orf19.6499	1.06278	0.99671	1.06278
CAL0002124	482	orf19.1180	-0.196542	0.184355	0.196542
CAL0000189	4268	orf19.1693	0.171933	0.161361	0.171933
CAL0003513	264	orf19.2674	-1.35933	1.27608	1.35933
CAL0000608	5733	orf19.58	-0.222039	0.208719	0.222039
CAL0005799	200	orf19.6855	-0.216299	0.203466	0.216299
CAL0004134	5729	orf19.3341	-0.176803	0.166359	0.176803
CAL0006320	4279	orf19.2265	-0.176005	0.165793	0.176005
CAL0005955	5283	orf19.3569	-0.445932	0.420202	0.445932
CAL0002259	4832	orf19.5809	0.216466	0.204061	0.216466
CAL0001266	3884	orf19.6319	0.186658	0.175975	0.186658
CAL0005714	1987	orf19.4144	0.211245	0.199372	0.211245
CAL0002930	1492	orf19.3932	0.652622	0.616136	0.652622
CAL0004657	1510	orf19.1467	-0.162827	0.153746	0.162827
CAL0003229	4743	orf19.3218	-0.717364	0.677615	0.717364
CAL0006373	3393	orf19.1625	-0.114362	0.108085	0.114362
CAL0005406	5705	orf19.2170	-0.148751	0.140615	0.148751
CAL0005678	2311	orf19.1591	0.128439	0.121554	0.128439
CAL0005903	4553	orf19.6885	-0.531693	0.504684	0.531693
CAL0000604	2146	orf19.54	-0.440035	0.417758	0.440035
CAL0005451	340	orf19.2186	-0.635731	0.603674	0.635731
CAL0001358	5398	orf19.5705	-0.152352	0.144842	0.152352
CAL0003583	666	orf19.4602	-0.240508	0.228868	0.240508
CAL0005569	4167	orf19.1569	-0.297162	0.282897	0.297162
CAL0002960	1297	orf19.1259	-0.249609	0.237664	0.249609
CAL0005310	5605	orf19.2129	0.635905	0.6061	0.635905
CAL0002393	3825	orf19.3173	-0.27037	0.257726	0.27037
CAL0004950	726	orf19.394	0.248965	0.237349	0.248965
CAL0003099	1376	orf19.3977	0.246657	0.235453	0.246657
CAL0004463	2409	orf19.4749	-0.374425	0.357485	0.374425
CAL0005286	4309	orf19.4800	0.505639	0.48278	0.505639
CAL0001167	4207	orf19.3733	-0.293209	0.279988	0.293209
CAL0000451	1842	orf19.3675	0.463102	0.442296	0.463102
CAL0002564	5747	orf19.1936	-0.257982	0.246509	0.257982
CAL0004029	5754	orf19.261	-0.128435	0.122741	0.128435
CAL0000442	2850	orf19.6213	0.147478	0.141017	0.147478
CAL0003185	5072	orf19.164	0.778302	0.745057	0.778302
CAL0002444	4569	orf19.3192	-0.11671	0.11175	0.11671
CAL0006224	364	orf19.4910	0.267768	0.256472	0.267768
CAL0006328	86	orf19.4952	0.30332	0.290688	0.30332
CAL0004688	5886	orf19.1470	0.133445	0.127914	0.133445
CAL0003290	876	orf19.198	-0.08757	0.083999	0.08757
CAL0005011	2862	orf19.3455	0.382067	0.36656	0.382067
CAL0005878	4852	orf19.3534	-0.354501	0.340577	0.354501
CAL0000487	5693	orf19.3695	-0.710303	0.683112	0.710303
CAL0001418	4359	orf19.5731	0.920436	0.885338	0.920436
CAL0002707	2775	orf19.1985	0.702844	0.676562	0.702844
CAL0001631	5027	orf19.2483	0.212656	0.204921	0.212656
CAL0000497	4791	orf19.6245	0.242452	0.233685	0.242452
CAL0001610	1406	orf19.2475	0.453404	0.437244	0.453404
CAL0001277	5636	orf19.1091	0.219222	0.211473	0.219222
CAL0005465	645	orf19.4874	0.218645	0.211046	0.218645
CAL0004404	2978	orf19.4727	0.207704	0.200555	0.207704
CAL0004823	3522	orf19.352	-0.343957	0.332128	0.343957
CAL0000100	977	orf19.4215	0.32575	0.31481	0.32575
CAL0006202	561	orf19.4905	1.05017	1.01496	1.05017
CAL0001213	59	orf19.3751	-0.303525	0.293583	0.303525
CAL0000177	4570	orf19.539	-1.16466	1.12654	1.16466
CAL0005838	1367	orf19.486	0.489736	0.47413	0.489736
CAL0002298	1550	orf19.5821	-0.697744	0.675679	0.697744
CAL0003257	1769	orf19.188	-0.263986	0.255924	0.263986
CAL0000211	1994	orf19.4240	-0.314953	0.305394	0.314953
CAL0002602	5663	orf19.1956	0.169206	0.164093	0.169206
CAL0000836	1570	orf19.2393	-0.257336	0.249885	0.257336
CAL0001315	3712	orf19.3799	-0.150409	0.146083	0.150409
CAL0002251	3911	orf19.6462	0.531565	0.516613	0.531565
CAL0005496	706	orf19.4882	-0.457179	0.44438	0.457179
CAL0006416	166	orf19.2297	0.337737	0.328675	0.337737
CAL0004222	913	orf19.3394	-0.887817	0.864056	0.887817
CAL0001638	1515	orf19.2488	-0.426385	0.415152	0.426385
CAL0001497	3422	orf19.5768	-0.147527	0.143777	0.147527
CAL0004796	2919	orf19.346	0.362297	0.353255	0.362297
CAL0005342	6180	orf19.5485	-1.40307	1.36809	1.40307
CAL0004676	1650	orf19.4012	1.17546	1.14624	1.17546
CAF0006997	1071	orf19.3788.1	-0.177766	0.173614	0.177766
CAL0001287	2120	orf19.6322	-0.418301	0.408605	0.418301
CAL0001345	4696	orf19.6357	0.471512	0.460759	0.471512
CAL0004161	5951	orf19.3357	0.14121	0.138098	0.14121
CAL0002615	550	orf19.809	0.232845	0.227727	0.232845
CAL0005781	4677	orf19.4163	-0.354819	0.347331	0.354819
	1174	orf19.3784	-1.39107	1.36274	1.39107
CAL0004559	2873	orf19.2091	-0.219501	0.215293	0.219501
CAL0003193	1564	orf19.3204	-0.331157	0.324913	0.331157
CAL0003219	2683	orf19.3213	0.369722	0.362842	0.369722
CAL0003239	4266	orf19.182	0.213846	0.209986	0.213846
CAL0005742	3072	orf19.458	-0.506196	0.497929	0.506196
CAL0005789	3070	orf19.470	-0.656681	0.64622	0.656681
CAL0006221	2986	orf19.2227	-0.782543	0.770358	0.782543
CAL0000791	5938	orf19.2379	-0.206066	0.202924	0.206066
CAL0120705	5228	orf19.36.1	-0.644677	0.635195	0.644677
CAL0001336	5070	orf19.6351	0.336382	0.331484	0.336382
CAL0001101	633	orf19.3714	0.870664	0.858419	0.870664
CAL0002010	4208	orf19.1149	0.471241	0.464809	0.471241
CAL0000299	2407	orf19.6953	-0.343763	0.3393	0.343763
CAL0001868	2244	orf19.757	-0.160746	0.158684	0.160746
CAL0006103	3313	orf19.2971	-0.397494	0.392804	0.397494
CAF0006949	5741	orf19.2397.3	0.751667	0.743141	0.751667
CAL0005313	3013	orf19.4813	-0.098014	0.096933	0.098014
CAL0003216	3412	orf19.3212	0.529776	0.523988	0.529776
CAL0000996	298	orf19.1793	-0.915974	0.906576	0.915974
CAL0002561	1166	orf19.1934	0.236412	0.234034	0.236412
CAL0006275	676	orf19.4931	-0.088377	0.087493	0.088377
CAL0000711	271	orf19.5671	-0.373967	0.370291	0.373967
CAL0003969	2426	orf19.1392	-0.445146	0.441349	0.445146
CAL0003248	937	orf19.185	0.147034	0.14583	0.147034
CAL0004176	2038	orf19.3366	-0.195744	0.194212	0.195744
CAL0000696	1073	orf19.5667	-0.530315	0.526409	0.530315
CAL0000481	1494	orf19.6238	-0.218633	0.21763	0.218633
CAL0001941	3504	orf19.3811	-0.294965	0.293778	0.294965
CAL0006066	936	orf19.6163	-0.442399	0.440823	0.442399
CAL0000516	424	orf19.6257	-0.087819	0.087638	0.087819
CAL0002366	1477	orf19.2507	0.235924	0.235698	0.235924
CAL0001915	3468	orf19.3809	0.210417	0.210298	0.210417
CAL0000720	5952	orf19.2333	-0.387712	0.388407	0.387712
CAL0003752	4916	orf19.4662	0.606523	0.607766	0.606523
CAL0004736	2443	orf19.1484	-0.810287	0.81228	0.810287
CAF0007032	2562	orf19.5194.1	0.227927	0.228561	0.227927
CAL0003504	4205	orf19.5215	1.0759	1.07923	1.0759
CAL0004898	4465	orf19.3414	-0.147962	0.14849	0.147962
CAL0003361	2676	orf19.2607	0.674032	0.676467	0.674032
CAL0004187	1447	orf19.3371	0.189796	0.190482	0.189796
CAL0003643	1403	orf19.5282	-0.550798	0.553016	0.550798
CAL0002221	203	orf19.3106	0.39567	0.39806	0.39567
CAL0002725	578	orf19.4535	0.52558	0.529737	0.52558
CAL0004054	807	orf19.270	0.996681	1.00473	0.996681
CAL0002386	4392	orf19.2514	0.749367	0.756734	0.749367
CAL0001124	5233	orf19.1036	-0.299481	0.302594	0.299481
CAL0002786	1446	orf19.4553	-0.272444	0.275672	0.272444
CAL0002663	3381	orf19.4519	0.333641	0.337777	0.333641
CAL0002674	4951	orf19.1977	0.373228	0.378324	0.373228
CAL0001317	2087	orf19.6341	0.248892	0.252294	0.248892
CAL0001271	2998	orf19.3774	-0.949343	0.96429	0.949343
CAL0004448	3213	orf19.1400	-0.262823	0.267075	0.262823
CAL0005900	5493	orf19.3540	-0.221952	0.225578	0.221952
CAL0004150	1220	orf19.3350	-0.168066	0.170842	0.168066
CAL0004303	4316	orf19.2794	0.186883	0.189981	0.186883
CAL0001038	1319	orf19.1010	0.75854	0.772034	0.75854
CAL0001753	2597	orf19.5071	-0.352892	0.359242	0.352892
CAF0006901	1591	orf19.544.1	0.172004	0.175237	0.172004
CAL0002962	5096	orf19.101	0.567903	0.57865	0.567903
CAL0005407	2714	orf19.1514	0.198122	0.202026	0.198122
CAL0000231	2916	orf19.6931	-0.78273	0.799482	0.78273
CAL0002420	1504	orf19.3184	0.240533	0.245869	0.240533
CAL0001500	5688	orf19.2426	0.175041	0.17899	0.175041
CAL0001686	57	orf19.5056	0.37241	0.38086	0.37241
CAL0003981	373	orf19.244	0.285547	0.292099	0.285547
CAL0003176	2489	orf19.3997	0.083216	0.085185	0.083216
CAL0004098	621	orf19.3325	-0.415617	0.42553	0.415617
CAL0006248	5145	orf19.2238	0.317316	0.325001	0.317316
CAL0004667	2453	orf19.316	0.265857	0.272312	0.265857
CAL0005761	5755	orf19.6843	0.552879	0.566947	0.552879
CAL0000832	2462	orf19.2391	-0.315547	0.323915	0.315547
CAL0000659	6111	orf19.76	-0.127846	0.131262	0.127846
CAL0005138	1169	orf19.2844	-0.199843	0.20533	0.199843
CAL0120690	2066	orf19.332.1	-0.202867	0.208541	0.202867
CAL0004995	1144	orf19.3446	0.346674	0.356422	0.346674
CAL0006412	823	orf19.1638	-0.410586	0.422196	0.410586
CAL0001436	4881	orf19.6399	-0.437226	0.450257	0.437226
CAL0120612	4085	orf19.2203.1	-0.831159	0.85646	0.831159
CAL0001286	1485	orf19.6321	-0.257563	0.265491	0.257563
CAL0000408	2148	orf19.3648	-0.349577	0.360732	0.349577
CAL0004745	2040	orf19.333	0.161804	0.167384	0.161804
CAL0002934	596	orf19.3934	-0.116508	0.120709	0.116508
CAL0001585	3944	orf19.2465	-0.46724	0.484736	0.46724
CAL0002766	716	orf19.1204	0.326193	0.338868	0.326193
CAL0004584	3462	orf19.1440	0.341093	0.354631	0.341093
CAL0000605	4416	orf19.55	-0.257913	0.268334	0.257913
CAL0002739	2240	orf19.1992	0.458594	0.477256	0.458594
CAL0005417	5263	orf19.1519	-0.168325	0.175222	0.168325
CAL0001215	1750	orf19.3753	0.546596	0.569665	0.546596
CAL0000303	3851	orf19.3612	-0.552216	0.575697	0.552216
CAL0004781	5254	orf19.1496	1.08249	1.1293	1.08249
CAL0005221	1652	orf19.2883	-0.337776	0.352393	0.337776
CAL0004396	5786	orf19.4723	0.380452	0.397244	0.380452
CAL0003442	2047	orf19.3294	0.154726	0.161573	0.154726
CAL0001784	6025	orf19.4426	0.215607	0.225377	0.215607
CAL0004408	4121	orf19.2042	-0.972583	1.01807	0.972583
CAL0001429	5001	orf19.3051	-0.233337	0.244376	0.233337
CAL0004411	854	orf19.5387	0.569742	0.597596	0.569742
CAL0004940	5066	orf19.4088	-0.424349	0.445577	0.424349
CAL0003945	2836	orf19.1388	-0.140685	0.147822	0.140685
CAL0003576	2362	orf19.905	0.390597	0.410628	0.390597
CAL0005040	8	orf19.3468	0.37343	0.392791	0.37343
CAL0004483	5244	orf19.4756	0.924097	0.972611	0.924097
CAL0000591	1947	orf19.6283	-0.255317	0.269026	0.255317
CAL0001127	3051	orf19.1039	0.652659	0.688017	0.652659
CAL0000724	3852	orf19.2335	0.136357	0.14394	0.136357
CAL0003555	6026	orf19.5242	0.194207	0.20526	0.194207
CAL0002883	2796	orf19.1237	-0.788783	0.833694	0.788783
CAL0002585	2187	orf19.1944	-0.508786	0.538008	0.508786
CAL0002306	3759	orf19.5827	0.550842	0.582504	0.550842
CAL0000283	5425	orf19.4262	1.01193	1.07021	1.01193
CAL0000463	5675	orf19.3680	-0.162552	0.171988	0.162552
CAL0005684	4544	orf19.1597	0.189491	0.200538	0.189491
CAL0001343	2432	orf19.6356	-0.332597	0.352131	0.332597
CAL0000652	61	orf19.2309	-0.305741	0.324121	0.305741
CAL0002521	3961	orf19.2573	-0.085689	0.090949	0.085689
CAL0000882	1513	orf19.607	0.930002	0.987276	0.930002
CAL0000311	5170	orf19.6958	0.5086	0.540076	0.5086
CAL0006359	2323	orf19.4961	-0.797606	0.847032	0.797606
CAL0001136	1121	orf19.685	0.155765	0.165419	0.155765
CAL0005536	191	orf19.401	0.276677	0.293936	0.276677
CAL0003152	3658	orf19.155	-0.382502	0.406738	0.382502
CAL0001229	746	orf19.1078	-0.25514	0.271548	0.25514
CAL0005987	3974	orf19.2921	0.41259	0.439182	0.41259
CAL0002874	3039	orf19.3919	0.499344	0.531923	0.499344
CAL0003657	3281	orf19.932	-0.338105	0.360624	0.338105
CAL0002884	3286	orf19.1238	0.259187	0.27657	0.259187
CAL0006505	3611	orf19.3010.1	0.204276	0.218222	0.204276
CAL0005377	5982	orf19.1500	-0.298748	0.319269	0.298748
CAL0001506	4499	orf19.3087	-0.094271	0.100881	0.094271
CAL0003585	2419	orf19.5260	0.29702	0.318152	0.29702
CAL0004272	2318	orf19.2775	0.133383	0.142895	0.133383
CAL0000622	1087	orf19.5639	-0.138441	0.148321	0.138441
CAF0006953	1915	orf19.2478.1	-0.077189	0.082779	0.077189
CAF0007418	2296	orf19.1860.1	0.12357	0.132534	0.12357
CAL0005710	3800	orf19.4142	-0.55361	0.593784	0.55361
	5154	orf19.319	-0.439508	0.471565	0.439508
CAL0000988	549	orf19.4335	0.305965	0.328376	0.305965
CAL0006335	5757	orf19.1613	0.099997	0.107329	0.099997
CAL0004747	2663	orf19.334	-0.592818	0.637105	0.592818
CAL0005393	3618	orf19.1509	-0.222666	0.2394	0.222666
CAL0003526	4979	orf19.5228	-0.216724	0.233248	0.216724
CAL0003544	3888	orf19.5239	-0.194947	0.210082	0.194947
CAL0005814	4112	orf19.3517	-0.798755	0.862006	0.798755
CAL0004028	221	orf19.6640	0.362468	0.391205	0.362468
CAL0001746	3809	orf19.718	-0.461129	0.498344	0.461129
CAL0001961	459	orf19.1133	0.341923	0.369776	0.341923
CAL0001193	3864	orf19.1058	0.210437	0.22787	0.210437
CAL0005965	5095	orf19.6119	0.28987	0.314479	0.28987
CAL0000198	4713	orf19.542	0.109551	0.118911	0.109551
CAL0001554	5570	orf19.2452	0.276993	0.301249	0.276993
CAL0003915	2423	orf19.220	0.102283	0.111305	0.102283
CAL0004406	3401	orf19.2041	0.162476	0.176822	0.162476
CAL0001471	233	orf19.5755	0.954046	1.03839	0.954046
CAL0004731	5293	orf19.4029	0.433684	0.472992	0.433684
CAL0001082	570	orf19.4368	0.949982	1.03742	0.949982
CAL0001974	4612	orf19.780	-0.380321	0.415346	0.380321
CAL0006226	4419	orf19.4912	-0.285279	0.311597	0.285279
CAL0002859	3341	orf19.876	-0.275674	0.30134	0.275674
CAL0005070	3047	orf19.6023	0.42127	0.460899	0.42127
CAL0006358	3285	orf19.4960	-0.314195	0.344212	0.314195
CAL0003656	2617	orf19.931	-0.438655	0.481338	0.438655
CAL0002676	902	orf19.1979	-0.183005	0.20156	0.183005
CAL0001875	5541	orf19.1112	-0.209462	0.230962	0.209462
CAL0003072	5621	orf19.6512	0.544247	0.601779	0.544247
CAL0004070	2766	orf19.3314	0.736152	0.814053	0.736152
CAL0001743	2933	orf19.716	-0.691305	0.764626	0.691305
CAL0002484	1630	orf19.2559	-0.188511	0.209051	0.188511
CAL0005537	2642	orf19.403	0.286331	0.3181	0.286331
CAL0003031	4724	orf19.123	0.291279	0.323627	0.291279
CAL0002038	277	orf19.3838	0.232134	0.258208	0.232134
CAL0004562	291	orf19.4779	0.317861	0.353891	0.317861
CAL0003091	2206	orf19.3970	0.705749	0.785938	0.705749
CAL0004481	1304	orf19.4755	-0.367571	0.409621	0.367571
CAL0004119	2089	orf19.3334	0.172501	0.192243	0.172501
CAL0005660	4725	orf19.437	-0.229251	0.255884	0.229251
CAL0000123	1832	orf19.526	-0.177005	0.197638	0.177005
CAL0006189	1736	orf19.2215	0.45961	0.513359	0.45961
CAL0005253	2355	orf19.2896	0.153214	0.171277	0.153214
CAL0003012	3438	orf19.3955	-0.179237	0.200523	0.179237
CAL0001812	1205	orf19.4435	-0.342437	0.383485	0.342437
CAL0006105	5372	orf19.2973	-0.277046	0.31054	0.277046
CAL0002721	2200	orf19.4533	-0.182598	0.20478	0.182598
CAL0003554	3613	orf19.5241	-0.20566	0.230816	0.20566
CAL0000646	2020	orf19.2304	0.181096	0.203273	0.181096
CAF0007005	6070	orf19.4205.1	-0.344148	0.387177	0.344148
CAL0005930	236	orf19.3556	-0.132931	0.149694	0.132931
CAL0001125	1920	orf19.1037	-0.417813	0.470691	0.417813
CAL0120670	635	orf19.3064.1	0.615313	0.693409	0.615313
CAL0002595	2728	orf19.5158	-0.301781	0.34033	0.301781
CAL0004321	520	orf19.2006	-0.451995	0.510069	0.451995
CAL0003473	4736	orf19.2654	-0.21289	0.240362	0.21289
CAL0002103	3110	orf19.6402	0.105632	0.119291	0.105632
CAL0001672	849	orf19.1840	-0.182995	0.206699	0.182995
CAL0003481	1518	orf19.5201	0.128108	0.144713	0.128108
CAL0001816	2256	orf19.4437	-0.168197	0.190099	0.168197
CAL0003793	4396	orf19.4677	0.473089	0.534717	0.473089
CAF0007028	445	orf19.4952.1	0.511479	0.578192	0.511479
CAL0003950	2121	orf19.232	0.232868	0.263494	0.232868
CAL0004381	5925	orf19.4719	0.23523	0.266265	0.23523
CAF0006942	612	orf19.2204.2	1.40228	1.58753	1.40228
CAL0002346	554	orf19.3159	0.145923	0.165372	0.145923
CAL0005281	94	orf19.2115	-0.116324	0.131943	0.116324
CAL0005790	3206	orf19.6850	0.914257	1.03751	0.914257
CAL0001895	860	orf19.763	-0.314014	0.356816	0.314014
CAL0003149	1432	orf19.154	0.22236	0.252742	0.22236
CAL0003672	3793	orf19.4635	-0.132046	0.150103	0.132046
CAL0000403	5972	orf19.3644	0.227922	0.259092	0.227922
CAL0000827	3050	orf19.1730	-0.219789	0.250137	0.219789
CAL0002127	4355	orf19.3869	0.150162	0.170959	0.150162
CAL0003939	2366	orf19.1381	-0.240328	0.273764	0.240328
CAL0006519	328	orf19.4195.1	-0.13542	0.154372	0.13542
CAL0005014	967	orf19.3458	0.334922	0.382234	0.334922
CAL0000102	3218	orf19.4219	0.159143	0.181675	0.159143
CAL0003574	4585	orf19.903	0.090773	0.103697	0.090773
CAL0000566	5034	orf19.5617	-0.226754	0.25997	0.226754
CAL0001658	4319	orf19.1837	0.232949	0.267203	0.232949
CAL0001732	3328	orf19.1865	-0.161489	0.185323	0.161489
CAL0002692	4574	orf19.4525	-0.263546	0.302456	0.263546
CAL0000064	4217	orf19.4208	0.288902	0.331862	0.288902
CAL0001588	2974	orf19.2468	1.2705	1.46033	1.2705
CAL0000320	2684	orf19.4274	-0.939675	1.08021	0.939675
CAL0002580	447	orf19.5148	0.177756	0.204456	0.177756
CAL0000057	5467	orf19.4203	-0.182641	0.210772	0.182641
CAL0005094	2103	orf19.3487	0.328851	0.380161	0.328851
CAL0004223	378	orf19.2739	0.172134	0.199375	0.172134
CAL0004738	1060	orf19.1486	0.579634	0.671865	0.579634
CAL0002310	5276	orf19.3141	-0.129399	0.150252	0.129399
CAL0002126	1719	orf19.1181	-1.23238	1.43273	1.23238
CAL0003548	1530	orf19.2693	0.68628	0.798112	0.68628
CAL0001178	2320	orf19.4393	-0.173338	0.201585	0.173338
CAL0000537	1789	orf19.5607	-0.171314	0.199249	0.171314
CAL0001828	3337	orf19.1896	0.14501	0.169221	0.14501
CAL0000340	1158	orf19.3623	-0.336783	0.393218	0.336783
CAL0002606	2901	orf19.801	-0.160011	0.186977	0.160011
CAL0003990	4744	orf19.247	-0.665118	0.777331	0.665118
CAL0005350	2111	orf19.2149	-0.436851	0.510609	0.436851
CAL0003067	4162	orf19.130	-0.320583	0.375289	0.320583
CAL0006147	5771	orf19.5537	0.259053	0.303261	0.259053
CAL0005871	272	orf19.3531	-0.350579	0.410604	0.350579
CAL0002280	2839	orf19.3130	0.160991	0.188591	0.160991
CAL0002635	4628	orf19.1963	-0.095671	0.112101	0.095671
CAL0006318	1586	orf19.2264	0.286436	0.336062	0.286436
CAL0005724	3095	orf19.451	0.171808	0.201638	0.171808
CAL0005394	2555	orf19.2166	0.126687	0.148742	0.126687
CAL0004733	1064	orf19.1481	0.243182	0.285811	0.243182
CAL0002120	4722	orf19.3862	-0.261576	0.307582	0.261576
CAL0006317	5116	orf19.1607	-0.221271	0.260235	0.221271
CAL0004486	4657	orf19.4757	-0.399237	0.469563	0.399237
CAL0004067	3246	orf19.3312	-0.190644	0.224295	0.190644
CAL0000441	496	orf19.6211	-0.302507	0.355925	0.302507
CAL0002720	5776	orf19.839	-0.166672	0.196193	0.166672
CAL0005916	3121	orf19.6891	0.145633	0.171489	0.145633
CAL0003984	1366	orf19.245	-0.330547	0.38968	0.330547
CAL0004343	2118	orf19.4702	-0.417351	0.492066	0.417351
CAL0001510	5586	orf19.5771	-0.135891	0.160441	0.135891
CAL0005436	1069	orf19.4866	0.247723	0.292677	0.247723
CAL0004393	3845	orf19.4720	-0.25992	0.307861	0.25992
CAL0004998	240	orf19.3449	0.183082	0.217294	0.183082
CAL0002333	984	orf19.3150	0.390028	0.463225	0.390028
CAL0001355	1743	orf19.5702	-0.449109	0.533442	0.449109
CAL0002468	5549	orf19.2549	-0.191295	0.227239	0.191295
CAL0006090	281	orf19.5514	-0.712255	0.847011	0.712255
CAL0002094	1416	orf19.3859	-0.13988	0.166352	0.13988
CAL0003699	2262	orf19.1301	0.330684	0.394139	0.330684
CAL0003605	2532	orf19.916	0.343955	0.410443	0.343955
CAL0003944	1905	orf19.1387	-0.223028	0.266151	0.223028
CAL0006325	6080	orf19.2269	-0.152056	0.181758	0.152056
CAL0002301	5731	orf19.5824	-0.826599	0.989195	0.826599
CAL0000016	2755	orf19.4987	0.108041	0.129362	0.108041
CAL0006211	5199	orf19.4909	-0.130177	0.155992	0.130177
CAL0002683	4095	orf19.827	0.395908	0.474797	0.395908
CAL0003177	1841	orf19.3998	-0.433396	0.52016	0.433396
CAF0007423	2542	orf19.730	-0.216771	0.260168	0.216771
CAL0006213	3849	orf19.5566	-0.156353	0.187694	0.156353
CAF0006907	2389	orf19.667.1	0.155692	0.186954	0.155692
CAL0000019	695	orf19.1646	0.134787	0.161971	0.134787
CAL0005255	991	orf19.2898	0.962401	1.15683	0.962401
CAL0001810	4685	orf19.4433	-0.403196	0.48479	0.403196
CAL0004431	3233	orf19.2050	0.362413	0.435818	0.362413
CAL0000931	555	orf19.1774	-0.400286	0.481658	0.400286
CAL0002848	2647	orf19.871	0.435816	0.524949	0.435816
CAL0000466	3125	orf19.3683	-0.135837	0.163826	0.135837
CAL0001659	4790	orf19.2494	-0.275478	0.332381	0.275478
CAL0000764	6084	orf19.2363	-0.104728	0.12648	0.104728
CAL0004550	433	orf19.4774	0.331782	0.401407	0.331782
CAL0000044	2444	orf19.1659	-0.271483	0.328722	0.271483
CAL0000364	408	orf19.592	0.436222	0.528237	0.436222
CAL0004366	3063	orf19.2029	0.193498	0.234346	0.193498
CAL0002740	1238	orf19.1993	-0.120027	0.145448	0.120027
CAL0004270	1899	orf19.2772	-0.22743	0.27576	0.22743
CAL0002592	1713	orf19.5155	0.22382	0.271541	0.22382
CAL0002371	1390	orf19.3168	-0.105421	0.12795	0.105421
CAL0003677	302	orf19.5294	-0.118591	0.143981	0.118591
CAL0004888	2326	orf19.374	0.262043	0.31837	0.262043
CAL0003694	4706	orf19.4641	0.124309	0.151094	0.124309
CAL0000367	3450	orf19.3630	-0.113894	0.138769	0.113894
CAL0003866	1964	orf19.200	-0.273631	0.333891	0.273631
CAL0004398	4905	orf19.4724	0.22452	0.274606	0.22452
CAL0002311	6117	orf19.3142	-0.337457	0.412772	0.337457
CAL0004592	830	orf19.1444	0.480194	0.58761	0.480194
CAL0004014	6011	orf19.6636	-0.316822	0.387783	0.316822
CAL0004042	6182	orf19.267	0.158012	0.19372	0.158012
CAL0000107	2239	orf19.1674	-0.21303	0.261259	0.21303
CAL0001877	4639	orf19.1113	-0.202672	0.249288	0.202672
CAL0003252	1482	orf19.3223	0.088594	0.109117	0.088594
CAL0000732	1011	orf19.2340	0.107108	0.131962	0.107108
CAL0004324	3890	orf19.2009	0.289754	0.357214	0.289754
CAL0002407	5149	orf19.5864	-0.193683	0.238934	0.193683
CAL0001525	3476	orf19.2436	0.340093	0.421599	0.340093
CAL0002697	463	orf19.5184	0.139404	0.172819	0.139404
CAL0002652	4755	orf19.4513	0.159035	0.197175	0.159035
CAL0003997	4410	orf19.6629	0.428539	0.532271	0.428539
CAL0001777	2058	orf19.4420	0.401449	0.498717	0.401449
CAL0005566	1975	orf19.1566	0.130813	0.162538	0.130813
CAL0001720	654	orf19.5064	0.317032	0.394188	0.317032
CAL0000436	3583	orf19.3665	0.233988	0.291057	0.233988
CAL0006399	3083	orf19.1632	0.332964	0.41442	0.332964
CAL0003183	4520	orf19.163	-0.29676	0.369802	0.29676
CAL0002575	3178	orf19.5142	0.418518	0.52221	0.418518
CAL0001454	2488	orf19.3062	-0.230005	0.287039	0.230005
CAF0007447	4027	orf19.4192.1	-0.31746	0.396311	0.31746
CAL0003053	5489	orf19.3965	0.360935	0.450666	0.360935
CAL0003658	1294	orf19.933	-0.14955	0.187324	0.14955
CAL0006296	4383	orf19.2257	-0.150744	0.188855	0.150744
CAL0002265	4879	orf19.3125	0.345297	0.433351	0.345297
CAL0000214	608	orf19.548	-0.152454	0.191353	0.152454
CAL0000062	5615	orf19.4206	-0.528269	0.663201	0.528269
CAL0006330	918	orf19.1610	0.645169	0.810693	0.645169
CAL0000694	2956	orf19.5666	0.262093	0.329494	0.262093
CAL0001797	6096	orf19.1888	0.525664	0.661499	0.525664
CAL0001311	296	orf19.3795	-0.360278	0.453857	0.360278
CAL0002907	5829	orf19.889	-0.587629	0.740396	0.587629
CAL0002381	1778	orf19.2512	0.368198	0.463954	0.368198
CAL0002742	4664	orf19.1995	-0.285136	0.359666	0.285136
CAL0005411	3933	orf19.2172	-0.696936	0.879391	0.696936
CAL0004169	213	orf19.2706	0.240266	0.303174	0.240266
CAL0005892	4161	orf19.4195	0.500497	0.631928	0.500497
CAL0003275	3389	orf19.3230	0.155896	0.197108	0.155896
CAL0003009	760	orf19.3951	0.272722	0.344943	0.272722
CAL0001282	6048	orf19.1096	0.28597	0.361903	0.28597
CAL0001501	4617	orf19.3083	0.202771	0.256817	0.202771
CAL0001866	1722	orf19.756	-0.492634	0.62426	0.492634
CAL0001289	5749	orf19.6324	-0.171612	0.217542	0.171612
CAL0005227	4529	orf19.2889	-0.367847	0.466558	0.367847
CAL0005049	4191	orf19.6018	0.143962	0.183066	0.143962
CAL0003986	898	orf19.6625	-0.247335	0.315035	0.247335
CAL0000147	2122	orf19.1681	0.398877	0.508072	0.398877
CAL0000880	4642	orf19.606	-0.385362	0.490941	0.385362
CAL0002579	2829	orf19.5147	-0.15782	0.201162	0.15782
CAL0006262	446	orf19.4929	0.233237	0.297465	0.233237
CAL0000515	4414	orf19.6255	-0.27722	0.353743	0.27722
CAL0002268	3634	orf19.3127	0.459334	0.586277	0.459334
CAL0002688	2812	orf19.4523	-0.338557	0.433223	0.338557
CAL0005582	1066	orf19.418	0.280405	0.359104	0.280405
CAL0004436	4895	orf19.4739	0.088991	0.113985	0.088991
CAL0006295	3361	orf19.2256	0.143414	0.183701	0.143414
CAL0005528	4955	orf19.4897	0.188611	0.241747	0.188611
CAL0004527	3780	orf19.4769	-0.249206	0.319563	0.249206
CAL0002482	3677	orf19.2557	-0.12408	0.159199	0.12408
CAL0002377	63	orf19.2510	0.456289	0.586003	0.456289
CAL0002714	330	orf19.834	-0.26241	0.337062	0.26241
CAL0005541	3100	orf19.406	0.109747	0.140973	0.109747
CAL0004687	4980	orf19.4019	0.387249	0.497658	0.387249
	4363	orf19.1770	0.493526	0.634531	0.493526
CAL0006287	5130	orf19.5595	-0.115804	0.148946	0.115804
CAL0000596	5133	orf19.5629	0.80478	1.03586	0.80478
CAL0002913	1277	orf19.3929	0.264023	0.339987	0.264023
CAL0120763	5037	orf19.4450.2	0.370032	0.477175	0.370032
CAL0006007	957	orf19.6134	0.168552	0.217612	0.168552
CAL0004172	4670	orf19.2708	-0.199331	0.257498	0.199331
CAL0006179	4362	orf19.5553	-0.194913	0.25221	0.194913
CAL0004489	3770	orf19.4758	0.117384	0.151916	0.117384
CAL0000077	2363	orf19.511	-0.223347	0.289295	0.223347
CAL0000595	3292	orf19.6285	0.242592	0.31423	0.242592
CAL0000298	611	orf19.6952	-0.317198	0.411509	0.317198
CAL0004269	3358	orf19.2771	-0.284748	0.369629	0.284748
CAL0002160	4415	orf19.1193	0.116091	0.150753	0.116091
CAL0000046	2078	orf19.501	0.079743	0.103553	0.079743
CAL0001907	2199	orf19.768	-0.296982	0.385958	0.296982
CAL0002733	5985	orf19.4539	-0.77831	1.01205	0.77831
CAL0003461	1641	orf19.2646	0.744677	0.968598	0.744677
CAL0000129	4924	orf19.528	0.135195	0.175896	0.135195
CAL0005156	4347	orf19.2859	0.234024	0.304522	0.234024
CAL0000492	6009	orf19.6240	0.148558	0.193369	0.148558
CAL0002052	3479	orf19.1159	-0.185155	0.241047	0.185155
CAL0001626	4933	orf19.1823	-0.745871	0.971537	0.745871
CAL0003973	5834	orf19.1396	0.179355	0.233835	0.179355
CAL0001882	5599	orf19.1116	0.207657	0.27128	0.207657
CAL0006265	5677	orf19.5587	0.50965	0.665895	0.50965
[truncated: 1,478 more rows]
